# Supplementary material for: Untargeted metabolomics confirms the association between plasma branched chain amino acids and residual feed intake in beef heifers
Source: PLoS One. 2022 Nov 29;17(11):e0277458. doi: 10.1371/journal.pone.0277458 (PMC9707789; doi:10.1371/journal.pone.0277458)
Supplement: S1 File — (XLSX) [file pone.0277458.s002.xlsx]

## Sheet: Tittle page
Untargeted metabolomics confirms the association between plasma branched chain amino acids and residual feed intake in beef heifers
Ezequiel Jorge-Smeding1,2, Sergio Polakof3, Muriel Bonnet1, Stephanie Durand4, Delphine Centeno4, Melanie Petera4, Sébastien Taussat5,6, Gonzalo Cantalapiedra-Hijar1*
1Université Clermont Auvergne, INRAE, VetAgro Sup, UMR Herbivores, F-63122 Saint-Genès-Champanelle, France
2Universidad de la República, Facultad de Agronomía, Departamento de Producción Animal y Pasturas, Montevideo, Uruguay
3Unité de Nutrition Humaine (UNH), INRAE, Université Clermont Auvergne, F-63000 Clermont-Ferrand
4Université Clermont Auvergne, INRAE, UNH, Plateforme d’Exploration du Métabolisme, MetaboHUB Clermont, F-63000 Clermont-Ferrand, France
5INRAE, AgroParisTech, GABI, Université Paris-Saclay, 78350 Jouy-en-Josas, France
6Eliance, 149 rue de Bercy, France
Supplemental Tables S1 and S2 containing the database of the current study
List of references for Suppl. Table S1 and S2:
RFI_class	Residual feed intake class
DMI_(kg/d)	Dry matter intake
RFI_(kg/d)	Residual feed intake
BWav_(kg)	Average body weight
ADG_(kg/d)	Actual daily gain
FCE_(g/kg)	Feed conversion efficiency
GM_(mm)	Gluteous medius
GS_(mm)	Gluteus superficiales
LD_(mm)	Latissmus dorsii
BHB_(mM)	β-hydroxybutyrate
NEFA_(mM)	Non-esterified fatty acids
Insulin_(µUI/mL)	Insulin
IGF1_(ng/mL)	Insulin-like growth factor 1
mz	Mass:charge ratio
rt	Retention time

## Sheet: S1 Table
S1 Table. Performance and classical metabolic data of the 48 extreme heifers used en the current experiment.
ID	Cohort	RFI_class	DMI_(kg/d)	RFI_(kg/d)	BWav_(kg)	ADG_(kg/d)	FCE_(g/kg)	GM_(mm)	GS_(mm)	LD_(mm)	Glucose_(mg/dL)	Urea_(mg/dL)	BHB_(mM)	NEFA_(mM)	Insulin_(µUI/mL)	IGF1_(ng/mL)
122167	2013_autumn	NEG	7.61	-1.07	539	0.658	86.398	8.1	7	6.1	80.8	10.7	0.4515	0.179478	31.615	186.172
122178	2013_autumn	NEG	5.09	-4.4	551	1.177	231.443	8.7	8.1	6.5	74	10.8	0.3253	0.1947	13.52	193.1
122192	2013_autumn	NEG	6.81	-2.19	554	0.853	125.325	8.7	7.6	7	79.6	12	0.5163	0.205674	18.79	244.182
122195	2013_autumn	NEG	7.71	-0.95	523	0.853	110.675	10.25	8.8	8.7	67.5	8.45	0.4632	0.207798	34.945	271.482
122200	2013_autumn	NEG	6.94	-1.43	555	0.663	95.628	9.6	8.9	8.7	79.2	10.3	0.3394	0.20178	22.63	203.834
122202	2013_autumn	NEG	6.61	-2.03	564	0.796	120.41	8.8	8.4	6.7	81.9	10.15	0.3421	0.662688	53.1	365.641
133015	2013_winter	NEG	7.2	-0.93	546	1.084	150.568	8.2	7.1	6.9	80.8	14.5	0.2142	1.39016	5.332	210.036
133026	2013_winter	NEG	6.96	-0.85	508	1.158	166.412	7.1	6.7	6.4	82.9	9.55	0.204	1.39	7.8315	214.671
133042	2013_winter	NEG	4.63	-1.27	400	0.762	164.586	5.4	5.2	4.6	74.4	17.25	0.2741	0.450288	7.2655	111.38
133045	2013_winter	NEG	6.14	-1.04	504	0.853	138.966	9.1	6.9	6.9	77.1	9.1	0.2613	0.726054	9.9485	249.009
133047	2013_winter	NEG	5.21	-3.12	568	1.207	231.677	8.1	6.7	7.2	76.8	9.75	0.225	0.64428	8.145	203.905
133049	2013_winter	NEG	5.54	-2.11	536	0.943	170.356	7.4	8.2	6.7	80	10.3	0.2923	0.594012	7.445	265.263
144054	2015_autumn	NEG	7.49	-1.3	502	0.768	102.598	8.9	6.9	6.3	78.3	16.05	0.2219	0.432234	8.7995	323.516
144060	2015_autumn	NEG	9.04	-1.04	658	0.979	108.301	13	11.15	8.8	68.3	16.45	0.2925	0.338778	12.85	282.719
144062	2015_autumn	NEG	7.96	-0.99	558	0.917	115.19	8.7	8.6	8.2	80.8	17.8	0.3286	0.304086	9.977	199.654
144080	2015_autumn	NEG	6.52	-1.57	493	0.649	99.491	6.5	5.6	6.2	103.8	13.2	0.3046	0.046728	10.265	309.972
144081	2015_autumn	NEG	7.89	-1.04	542	0.888	112.606	9.1	8.3	7	84.2	14.9	0.403	0.21771	20.7	285.758
144084	2015_autumn	NEG	7.63	-2.81	672	0.998	130.838	11.1	8.2	9.45	78.6	19.05	0.343	0.277182	28.98	306.193
155207	2015_winter	NEG	7.7	-2.18	473	1.128	146.438	7.5	6.8	6.5	78.1	18.1	0.3442	0.379488	13.46	211.444
155211	2015_winter	NEG	7.81	-2.22	455	1.391	178.165	8.4	8.5	7.25	80.7	22.35	0.6029	0.278244	39.42	214.083
155220	2015_winter	NEG	8.06	-2.44	527	1.132	140.487	8.9	6.3	6.9	92.6	17	0.4573	0.119652	16.12	194.084
155226	2015_winter	NEG	7.39	-1.62	410	0.992	134.24	6	6	4.9	75.8	18.35	0.4479	0.258774	7.569	159.56
155232	2015_winter	NEG	8.18	-2.57	535	1.269	155.094	8.4	6.3	7.1	79.4	19.55	0.34	0.38	13.46	260.254
155233	2015_winter	NEG	9.58	-1.38	571	1.13	117.967	9.1	8.6	8.1	80.1	16.15	0.4134	0.39825	13.85	226.194
122172	2013_autumn	POS	10.92	1.08	618	0.909	83.246	9.3	8.4	6.6	74.2	12.75	0.4578	0.257712	47.785	317.403
122173	2013_autumn	POS	10.08	1.48	507	0.869	86.136	8.1	8	6.8	75.1	14.05	0.5139	0.154344	13.045	218.223
122176	2013_autumn	POS	10.54	1.33	556	0.926	87.831	6.6	8.4	6.2	81.9	11.9333	0.5556	0.21063	40.83	236.25
122179	2013_autumn	POS	10.07	1.08	582	0.627	62.28	8.8	7.1	7	71.8	9.4	0.386	0.25311	12.6995	170.998
122186	2013_autumn	POS	9.47	1.46	478	0.73	77.054	7.2	6.2	5.9	90.8	10.75	0.3934	0.159654	11.335	189.387
122208	2013_autumn	POS	10.06	2.47	490	0.601	59.727	9.2	9.3	7.1	77	12.4	0.4692	0.301608	25.275	136.879
133034	2013_winter	POS	8.75	0.78	518	1.193	136.351	7.4	7	7.5	79.8	9.4	0.2351	0.687114	10.6855	180.486
133043	2013_winter	POS	9.49	1.52	553	1.054	111.026	8.1	7.7	6.8	67.28	0	0.24	0.61	11.49	229.624
133048	2013_winter	POS	9.09	2.37	462	0.853	93.794	7.4	6.3	6.9	81.3	9.8	0.3404	0.527106	6.953	142.286
133050	2013_winter	POS	8.42	1.08	493	1.073	127.366	8.4	8.2	6.7	92.7	15	0.3585	0.808536	10.7	225.915
133051	2013_winter	POS	8.81	1.27	551	0.733	83.2	10.95	9.85	8.2	82.6	10.85	0.2671	0.436482	8.6355	157.949
133052	2013_winter	POS	8.14	0.92	493	0.972	119.468	10.35	6.9	6.6	0	0	0.25	0.69	6.854	226.432
144055	2015_autumn	POS	12.2	2.14	611	0.859	70.413	13.4	10.7	8.5	80.8	16.7	0.3527	0.35754	8.07	234.726
144058	2015_autumn	POS	10.29	1.2	532	0.75	72.836	9.7	8.9	7.4	78.6	13.4	0.2263	0.740922	5.846	177.061
144065	2015_autumn	POS	10	1.5	512	0.948	94.822	7.4	6.6	6.2	85	15.4	0.3203	0.731364	6.8905	286.669
144072	2015_autumn	POS	9.98	1.81	505	0.607	60.822	11.3	9.2	7.9	84.7	20.05	0.3818	0.426924	9.4305	228.805
144077	2015_autumn	POS	9.51	1.11	521	0.646	67.98	10.35	9.2	7	78.8	19.2	0.322	0.358956	11.632	196.8
144090	2015_autumn	POS	9.97	0.87	563	0.841	84.366	9.35	6.3	6.6	83	15.15	0.3696	0.338778	17.45	271.986
155208	2015_winter	POS	12.56	1.96	527	1.217	96.855	10.2	7.3	7.1	83.5	19.2	0.6329	0.195762	23.075	216.795
155210	2015_winter	POS	12.64	1.28	574	1.422	112.476	10.15	8.8	6.6	82.4	20.35	0.4412	0.344088	28.395	204.533
155217	2015_winter	POS	11.34	1.04	484	1.359	119.858	9.05	6.5	6.4	79	15	0.511	0.309042	18.56	149.143
155221	2015_winter	POS	13.29	2.98	538	0.898	67.575	9.35	7.9	7	85.1	21.6667	0.3831	0.28	20.375	170.096
155225	2015_winter	POS	13.28	3.01	525	0.976	73.482	7.6	7	6.6	77	20.05	0.3215	0.254172	18.12	182.201
155228	2015_winter	POS	13.26	2.3	557	1.241	93.622	9.4	7.8	6.8	80.7	14.6	0.5335	0.305502	9.577	230.53

## Sheet: S2 Table
S2 Table. Metabolomic dataset
					ID_animal	122179	122192	155211	133051	155217	133026	144062	144090	122202	133048	122176	133049	155207	144072	155221	144060	133043	133042	122178	144077	122173	144054	155226	155208	133015	144065	133050	144084	122167	155228	122208	155220	144055	144080	133047	155225	133052	155232	122195	122172	144081	155210	144058	155233
ion	mz	rt	Annotation class	Compound	adduct / RFI class	POS	NEG	NEG	POS	POS	NEG	NEG	POS	NEG	POS	POS	NEG	NEG	POS	POS	NEG	POS	NEG	NEG	POS	POS	NEG	NEG	POS	NEG	POS	POS	NEG	NEG	POS	POS	NEG	POS	NEG	NEG	POS	POS	NEG	NEG	POS	NEG	POS	POS	NEG
M112.05052T1.21	112.051	1.21181	1	Cytidine	[M+K]+ 73.0914 [M+H-C6H10O4]+ 257.098	136088	131056	180310	99981.4	79180.6	99968	125414	123173	139210	196038	96161.8	127247	132726	118991	96113.6	133868	68337.1	196286	157082	93880.2	130887	136147	181820	130093	113962	129382	91092.6	114060	118974	72327.7	182572	88599.5	124982	121755	141910	159295	79819.8	114209	100962	119284	160841	122120	102403	128101
M115.08654T0.78	115.087	0.783985	1	Ornthine		27355.8	28893.3	32070.7	38970.7	32885.9	40046.3	35742.9	42738.5	23169.5	34708.6	44151.9	36062.6	27723.8	48084.4	49039.5	28902.4	34606.2	30936.3	33684.8	41795.6	32384.4	26508.2	26827.4	50727.6	24428.3	31119.6	30296.6	27993.9	30463.5	24760	24025.9	50329.7	36348.9	21627.2	29429.5	26961.9	22993.4	27879.7	35395.6	37649.8	30138.1	27822.5	30973.5	24944.4
M132.10185T2.54	132.102	2.53576	1	Leucine	[M+K+HCOOH]+ 47.1332 [M+Na+HCOOH]+ 63.1072 [M+H+HCOOH]+ 85.0891	563715	596086	619576	720643	601448	738774	567258	507464	459985	596536	526005	374580	497415	642819	615347	503358	456918	434034	597639	602142	545147	549388	500467	729126	465125	568794	775180	413619	592178	532208	510995	471692	624776	438884	418470	582618	574611	570581	600690	505565	664993	563106	644587	444497
M133.0972T0.78	133.097	0.782664	1	Ornithine		147485	167490	167654	230452	192360	220101	175946	208242	146513	189421	240105	164345	135030	255102	250996	157875	198890	174781	175707	222906	180541	151757	141055	282222	130540	165740	197122	171071	135606	146444	141069	302172	197750	112092	147788	139975	146471	165676	196892	203265	175064	148308	201296	122950
M141.06598T1.09	141.066	1.09396	1	Methylimidazolacetic acid		11653.1	12232.2	8034.68	6801.81	9880.13	16150.4	12383.8	15126.9	16773.1	12788.5	11081.1	10303.1	16163.6	10525.7	8749.7	11166.4	10608.8	15753	8659.24	8714.42	9615.45	12332.5	10075.9	11516.4	18196.1	11581.1	12362.2	12163.6	13833.7	7884.78	11753.9	28730.5	17892.8	11969.3	10564.7	10554.6	11442.1	9097.87	13705.1	8192.06	10351.4	10856.2	10992.4	13656
M147.1128T0.78	147.113	0.782664	1	Lysine	[M+H+NH3]+ 129.079	141238	157641	189196	229440	240109	206133	154755	181028	130724	180686	201542	123660	133026	210152	210417	179946	158524	115001	218874	171110	137163	160583	111112	226857	125837	145591	230625	135957	155594	127393	162600	189094	205260	77732.1	139683	118694	140850	182196	161452	194894	178319	138870	187348	120819
M72.08057T1.21	72.0806	1.21217	1	Valine	[M+H-CH2]+ 85.0908	5.95492e+06	7.1006e+06	7.05832e+06	8.36482e+06	7.1378e+06	6.04342e+06	7.13221e+06	6.7597e+06	5.68911e+06	6.70728e+06	7.19054e+06	6.352e+06	8.26908e+06	7.48219e+06	8.64981e+06	6.9142e+06	7.88664e+06	6.94321e+06	9.11422e+06	8.7464e+06	8.0492e+06	5.65564e+06	7.43065e+06	6.79815e+06	5.60113e+06	8.13488e+06	9.3109e+06	6.36798e+06	6.73698e+06	6.91904e+06	6.61809e+06	5.91473e+06	4.84576e+06	5.62059e+06	4.89792e+06	6.24166e+06	6.99695e+06	5.73671e+06	6.12714e+06	6.1453e+06	7.47321e+06	6.51253e+06	7.46244e+06	5.92674e+06
M86.09637T2.55	86.0964	2.54704	1	Leucine	[M+K]+ 47.1332 [M+Na]+ 63.1072 [M+H]+ 85.0891	364057	381811	393276	462008	407278	489897	367344	338846	320007	395444	339121	257689	340807	430148	418657	330664	309736	294465	400172	399328	371571	361469	317660	475919	337032	394874	511527	283586	412177	354155	353392	309741	429741	290358	279060	397445	369542	380407	407715	337771	428488	384756	420953	295696
M100.03246T0.74_2	100.032	0.743098	-	-		521472	541174	541026	527559	564855	567193	553967	536332	535372	554869	604903	545401	593059	590059	562468	561544	570291	525991	596243	526432	488640	523800	512111	483308	499360	521265	577564	500105	537052	551670	526294	507231	557512	545367	554276	552525	538763	526097	554146	483347	542020	559683	549820	554189
M101.02847T0.74_3	101.028	0.742365	-	-		28775.2	25579.2	27725.2	27172.4	27788.5	30668.6	26750.1	28640.2	28283.9	28628.8	30491.3	25873	24684.8	30320.5	30429.4	29590.5	30151.4	26681	32056.9	25844.1	27822.2	31220.9	27473.8	29374.1	32293.5	30044.6	32501.7	28428.1	31005	31006.6	30138	29080	28912.2	28197.9	28282.8	30030.1	31710.9	27459	29587.2	28203.5	28531.8	30862.6	30226.9	30793.7
M101.52797T0.74_1	101.528	0.743448	-	-	[3M+2H]2+ 67.01	148499	155410	161946	156224	156959	164612	166095	159525	153341	163262	161365	152234	148457	160270	148289	154513	151088	141162	162809	140966	135031	136485	157057	132069	135871	147409	156154	145055	152299	160541	155650	144145	155779	155740	164287	152904	153569	155868	154814	136629	160853	161069	160924	164309
M102.034T0.74_3	102.034	0.741833	-	-	[M+H+HCOOH]+ 55.026	126974	127495	125626	125015	129783	133802	129027	121361	134087	144476	136637	139567	155315	134155	140861	135346	144503	143749	150084	144045	142819	140772	140184	138835	135335	141400	138735	135365	127144	130522	146315	132499	141711	152823	140278	141041	135915	141604	136782	129148	150227	139219	125184	135927
M102.05527T0.92	102.055	0.915717	-	-	[M+H-CH4]+ 117.08	27000.5	30834.2	25699.6	31983.5	28596.2	34633.9	26233.6	25878.2	23568.4	30966.5	22586.5	16245.1	22449.7	25648.3	25460	22509.3	19843.1	31907.4	25251.8	25004.2	18559.6	25095	18961	23813.3	17547.6	24042.4	23770.2	22365.5	18683.9	23929.7	23099.5	32308.2	31269.7	21990.1	20674.5	22505.3	22741.5	29932.4	29761.4	24701.8	28960	27067.8	27118.4	25391.4
M102.12796T1.22_3	102.128	1.21822	-	-		287758	214881	153043	172883	185178	191610	202729	147320	149797	291229	146329	238304	199151	266087	184941	165850	229059	271967	226820	177947	134156	293215	120307	267319	160603	223114	74345.7	168095	189079	160030	186457	247428	241878	295486	284644	132235	191392	217530	311497	304537	48450.4	222835	68813.9	208989
M102.55286T0.74	102.553	0.735918	-	-		3878.05	3691.81	3659.29	3322.07	3445.22	3656.14	4341.89	2786.62	4096.81	4457.53	5083.34	4300.04	5637.66	4753.06	5922.44	4156.9	6301.94	5474.64	4830.02	6014.43	7050.67	5269.54	5415.56	6243.41	5371.14	7807.46	5783.61	4897.01	5284.02	4886.22	4391.21	3602.3	3758.54	4820.59	4759.12	4808.3	4866.65	3628.43	4726.24	5151.45	4304.53	5889.79	4334.89	4106.84
M102.97058T0.75_2	102.971	0.745271	-	-		245759	265397	267271	250175	284067	270960	266628	263381	269124	278144	260292	252292	256087	252032	236523	243940	249349	246213	249283	234169	231403	244624	240822	235675	235922	241613	276728	253499	255842	278229	263247	243394	281048	274400	256706	255069	244266	263424	270706	242502	270781	271729	275513	269338
M103.05107T0.74_4	103.051	0.742279	-	-		6412.11	6579.08	6640.86	5570.61	6249.84	5900.69	6952.81	6191.97	5905.24	6753.39	5581.4	5350.91	5867.09	5148.79	6938.19	5251.56	6519.68	5007.94	6538.35	4421.77	5214.66	7203.72	4728.17	5339.36	8122.32	7955.23	6471.83	6830.26	6273.82	5383.41	6841.55	6747.76	5189.73	5491.44	6683.4	7032.3	5097.85	4855.05	6210.21	6452.52	6429.25	7464.99	7610.63	7430.18
M103.05465T6.15	103.055	6.148	-	-	[M+H-HCOOH]+ 148.053	17313.9	16095	15500.9	14734.3	18140.9	17191	12993.5	12595.8	12261.9	12497	11991.3	12154.8	11574.5	14367.2	14853.1	13684.4	11579.6	14215.3	14672.8	17213.8	11894.1	15489	12396.3	15671	12374.2	13497.4	11933.6	13911.9	13634.3	11213.9	12827.9	13286.9	14030.2	11891.6	18479.5	17231.9	12641	13699.6	13870.8	11898.9	14951.3	14639.9	18451.1	14868.1
M103.13136T1.22	103.131	1.219	-	-		21452.1	16742.9	10356.7	12171	12072.4	14500.6	15493	9688.83	12158.6	19181.4	11458.5	17854.9	13683.8	19263.8	14629	9930.53	16671.4	15791.9	14198.8	12379.3	8752.1	21277.9	8622.84	20446.8	11970.1	14610.2	5289.92	13973.6	14480.3	10876.4	11389.2	19662.7	17550.3	20264.6	22817.1	7341.71	10695.8	15347.3	20834.8	21992.2	3387.62	14269.3	5313.27	15823.9
M103.5609T0.74_2	103.561	0.742447	-	-		2614.92	2902.65	3085.19	2402.1	3606	2678.47	2479.72	2843.95	3906.56	2996.13	2256.92	2313.2	2718.47	2729.29	2632.1	3216.51	3374.93	2987.94	2670.78	2508.89	3007.7	2908.59	2523.25	1871.42	3437.03	2359.81	2554.28	3968.73	2739.11	3120.22	2247.33	2729.09	2620.67	2418.05	1807.13	2829.37	3071.46	2841.47	2491.08	2574.5	3446.1	3572.6	3017.86	2989
M104.05312T1.22	104.053	1.21784	-	-		209501	201891	209786	147606	237040	273376	199009	231334	191222	279250	198175	198416	135645	216443	248992	211300	173195	133152	223627	155682	171085	201004	170856	232034	250946	249858	229704	208769	279244	145435	188678	230066	253791	167425	224809	237840	190863	199427	255494	192133	222247	272620	189864	186986
M104.07087T0.99	104.071	0.990886	-	-	[M+K+HCOOH]+ 19.1 [M+Na+HCOOH]+ 35.0739 [M+H+HCOOH]+ 57.0562	68565.1	66677.4	125233	51864.9	85193.7	144899	98247.8	79958	84928.2	124443	47464.9	69463.4	91519.8	114109	100676	115009	67125	153939	82942.7	108435	114697	107639	137654	108990	133523	120132	124315	96213.9	169338	90282.5	137544	104361	105218	107775	80745.4	103834	78972.4	132980	124078	47179.1	92919.7	79494.2	99380.3	84818.8
M104.10734T0.89	104.107	0.893181	-	-		1.25037e+06	555814	1.08544e+06	1.61517e+06	1.20912e+06	1.5668e+06	1.52981e+06	1.40329e+06	352005	1.85297e+06	500851	1.56841e+06	1.47153e+06	1.77194e+06	1.44419e+06	2.69405e+06	1.92426e+06	1.89105e+06	1.0555e+06	1.65068e+06	1.12217e+06	1.90527e+06	1.03382e+06	854549	1.81083e+06	2.1061e+06	1.63321e+06	1.93953e+06	1.49883e+06	1.58233e+06	729532	7.31792e+06	1.73097e+06	1.45094e+06	1.91051e+06	1.41696e+06	1.93151e+06	1.55223e+06	867410	312386	1.67967e+06	1.741e+06	1.78776e+06	940938
M105.03389T8.4	105.034	8.39807	-	-		2.47502e+06	3.40075e+06	3.66927e+06	2.1442e+06	2.79701e+06	3.11818e+06	3.11533e+06	3.105e+06	3.25946e+06	2.46965e+06	2.80355e+06	2.75567e+06	1.81095e+06	2.96488e+06	2.66193e+06	2.20607e+06	3.01619e+06	3.20735e+06	2.72156e+06	2.44486e+06	2.82065e+06	2.63662e+06	2.62641e+06	1.68272e+06	1.91876e+06	2.88101e+06	2.43481e+06	2.7804e+06	2.56004e+06	2.8569e+06	2.41489e+06	2.70986e+06	3.01658e+06	2.35226e+06	2.96585e+06	3.28558e+06	3.10077e+06	3.09756e+06	2.73863e+06	2.53919e+06	2.85682e+06	2.62737e+06	2.25038e+06	2.78467e+06
M105.05534T1.22	105.055	1.22249	-	-		20409	23178.8	42565.9	20198.7	30263	27401.6	25216.2	27899.8	21184.8	29900.9	34324.6	27237.6	19879.3	25760.7	20563.7	26346.9	30838.5	20220.4	20865.7	25988.8	33554.4	21155.5	27183.4	39797.2	24602	31471.7	29083.3	25128.3	26085.5	30948	32668.2	19676.1	27788.1	25802	23109.6	15040.1	29028.6	18459	36670.8	21096.9	27675.5	23658.1	20139	22339.1
M105.07031T11.15	105.07	11.1521	-	-	[M+2H-HCOOH]2+ 254.136	25260.5	20219.9	18663	8052.84	24658.6	16011.8	18087.9	17771.4	20530.1	25279.7	23127.4	18401.4	14328.4	13572.7	17858.1	19318.4	16624.5	20037	12513.1	13328.6	13403.8	13772.4	13652.2	14919	9488.36	20589.3	15891.3	25194.5	11514.3	14097.1	5704.55	11148.2	15109.4	15011.8	11870.7	17381.2	20154.1	10725.9	27975.2	14565.6	11465.5	20889.8	13547	18447.4
M106.03725T8.4	106.037	8.3974	-	-		169294	238977	254306	154083	201530	221527	219902	227228	235413	172127	214140	206798	150301	232282	208189	188460	246996	256757	218761	192392	210502	191649	203545	125466	146099	215666	190958	214569	200914	226235	190926	201938	218860	170819	235567	249614	217871	233801	209137	191171	216589	198799	167472	202162
M106.08661T0.88_2	106.087	0.88338	-	-		13216.4	19536.5	13799.3	17414.1	14056.4	14095.5	18970.5	22196.7	20562.6	15484.5	18028.5	18615.7	25617.6	12661.3	10302.8	19034.2	13302.5	13270	22916.4	14882.9	15465.6	14202.8	20435.4	30998.1	32912.8	28335.3	47519.9	25371.1	21736.5	32674.3	30549.7	65793.5	18224.4	17022.8	13298.9	27167.6	13960.9	17078.3	16691.2	18509.1	48224.4	13473.7	43043.3	10772.6
M107.03953T8.4	107.04	8.39769	-	-		10027.2	11701.6	16309	10204.8	12478.7	13981.3	15103.3	13326.5	15511.9	11995.2	12339.5	12779.4	7831.86	13970	13841.6	10656.9	12857.4	14175	11834	10719.8	13508.8	11665.9	11959.9	7128.2	8837.53	11536	11877.3	12058.8	10415.9	13830	13112	11472.4	13099.2	9812.21	11895.1	14422.9	13655.3	12483.9	12581.9	9853.58	12180.1	12577.8	11580.5	11372.8
M107.04955T8.66	107.05	8.66027	-	-		58637.7	110517	147879	59596.5	66035	60012.8	72240.7	68554.1	59889.2	59625.4	51492.1	60122.6	4786.21	95739.4	69036.4	43940.1	60050.3	60213.2	97550.7	55860.3	77410.4	40663.6	4605.21	-13342.1	59812.9	65936.3	60070.8	59965.9	34008.3	53545.5	37970.6	90778.4	57211.8	42477.9	60159.7	137459	60540.2	61331.3	96783.1	61454.2	71646.8	44829.6	45057.5	52351.3
M108.53685T0.74_1	108.537	0.744925	-	-		430158	461102	488387	421905	508013	497059	472999	496265	477937	534518	551557	467710	478890	492450	436410	478814	450418	433268	511115	419651	395630	412558	410665	382941	419690	441608	531067	478323	477495	498401	452275	458853	481670	474545	487649	473058	467253	480260	485301	434337	472051	495462	487020	496615
M109.02862T0.93	109.029	0.926806	-	-		16536.8	15583.2	15205.1	12512.2	14839	11664.8	15320.3	12902.4	15454.6	12894.7	9269.72	12716.5	8825.85	8384.95	10267.1	11384.2	9709.3	12285.1	9911.16	12106.3	9867.55	12381	11378.9	11527.8	10129.9	11090.9	10640.3	9018.01	11067.1	11107.2	10920.4	10742	15756.4	12070.4	11696.2	10513.6	11345.3	18181.9	13457.4	8821.48	11570.4	12589.6	14754	11561.1
M109.06504T9.06	109.065	9.06458	-	-	[M+H]+ 108.058	163508	390639	421427	165423	323590	190225	246110	224170	194848	218119	325422	191075	69061.9	296939	233578	157627	193654	350164	262447	207462	210975	152654	80836.6	-14551.6	164481	240334	175576	206320	98801.2	189847	109010	267686	194308	153181	228573	388513	206118	181996	243306	177243	218064	152486	163664	166364
M110.00865T0.74	110.009	0.739609	-	-		2.94974e+06	2.70436e+06	2.78037e+06	2.44796e+06	2.54152e+06	2.8045e+06	2.9693e+06	2.53179e+06	2.83127e+06	2.62797e+06	2.50118e+06	2.73895e+06	2.54281e+06	2.60259e+06	2.90804e+06	2.92294e+06	2.67545e+06	2.73315e+06	2.67307e+06	2.61155e+06	2.7225e+06	2.95276e+06	2.63598e+06	2.78252e+06	3.0639e+06	3.10912e+06	2.72761e+06	2.67151e+06	3.18154e+06	2.67115e+06	2.57688e+06	2.53723e+06	2.80301e+06	2.52234e+06	2.43938e+06	2.97764e+06	2.96923e+06	2.8638e+06	3.00349e+06	2.25043e+06	2.7617e+06	3.14835e+06	2.79469e+06	2.86387e+06
M110.06835T9.07	110.068	9.06813	-	-		13435.6	25837.1	29962.5	13158.3	22356.1	14833.3	19658.9	18216.4	13363.6	16350.9	20557.5	14467.4	6129.89	21651.9	16247.1	12120	14366.4	25862.7	20023.8	13780.8	15116.1	11526.1	6754.88	-213.339	13423.3	19076.3	13778.8	16713.4	10138.5	18661.1	9609.35	21190.3	15972.9	12820.4	19031.9	29771.7	17651.7	14862.2	21744.9	15013	16407.2	14442.7	13532.1	11311.2
M110.9754T0.73_1	110.975	0.730872	-	-		-26495	-26276.4	35982.6	1861.37	36158.3	1153.33	6594.1	5448.12	-26742.4	1390.22	-27028.2	1766.97	36289.5	6040.78	36575.3	5182.39	1312.42	998.613	-26546.6	5736.58	333246	5578.37	36301.7	36654	422067	5505.81	864.873	372063	-26919.8	36129.5	-26545.7	35492.3	5420.15	5587.11	605.258	36138.2	893.719	36058.7	367530	-26209.1	5658.79	35964.3	5059.14	36130.4
M111.0098T0.74_2	111.01	0.740065	-	-	[M+K+NH3]+ 55.026	439511	405553	425104	373395	377608	429057	440689	391451	426973	399233	391742	411598	387944	389665	438201	452747	434880	420571	407949	387448	401285	436900	402576	433162	454089	486133	408505	406729	484694	413632	387632	391980	440756	395553	365056	462240	443386	441493	468104	343144	421280	479909	442854	438356
M111.08051T9.19	111.081	9.18751	-	-		366372	663702	765735	323097	450720	433887	581319	479835	323313	498481	376530	458698	178612	739953	584820	305917	461415	790140	596655	508073	606421	291268	302526	-81216.4	313106	554655	379196	502932	378122	503545	554456	641383	450207	311051	594626	710574	521572	489930	494309	409259	538409	504185	346177	558982
M111.54029T0.74	111.54	0.741936	-	-		10904.7	10824.5	13068.4	9796.17	10189.6	11969.5	10492.5	12679.5	12003.3	11078.4	11711.1	13401.7	12568.4	13723.8	9584.35	11579.8	11171.9	9941.68	11946.3	10650.6	10703.4	10273.7	11276.8	11734.5	10253.8	9461.43	12777.4	9639.84	10885.2	11383.5	11228	11308.4	10671.9	10049.4	10426.7	10058.1	10558.9	10139.9	11884.3	9272.28	12166.5	9574.63	9301.58	9804.16
M111.55794T0.74_1	111.558	0.737347	-	-		10939.7	10421.7	10074.6	12639.6	12734.1	11793.6	11384.5	14180.3	10426.4	12799.3	15234.8	12938	13393.9	14704.5	13356.6	13564.7	15344.4	11480.6	11832.7	11883	10718.3	10923.4	14899.9	12592.8	12438.5	14067.6	13168.4	11278.1	17341.8	10763.5	9873.15	10269.5	12361	11578.9	9189.77	12143.5	12553.5	11082	11925.3	10666.1	11779.7	13718.5	10712.9	13389.8
M112.00614T0.74_2	112.006	0.740622	-	-		398012	372462	381311	339723	345447	383645	399940	342253	383282	355962	352934	376509	356813	356055	397785	403659	388078	368303	384386	361018	380019	412884	364542	383836	402769	434564	384483	374060	426886	384413	345334	344709	383954	338094	330767	406372	402787	392495	421970	302905	361208	420103	388887	378751
M112.05868T0.74_3	112.059	0.736872	-	-		2826.12	3381.81	3325.62	3251.51	4019.51	3290.4	3161.06	3315.73	3058.94	3080.38	2297.88	3105.58	2509.96	4139.39	3019.94	3335.95	3504.69	2617.97	3066.05	2925.11	2988.87	3191.1	2663.59	2618.46	3897.56	4044.09	3621.71	3811.18	4544.81	3017.57	3427.42	3483.92	3517.05	2873.57	4057.21	4176.92	5014.02	2928.48	3353.21	3459.36	3608.17	6127.15	3869.02	3900.26
M112.07573T1.1	112.076	1.09733	-	-	[M+H-NH3]+ 128.096	12904	20581.4	16735.8	8833.41	13854	24496.6	17918.2	14914.1	13249.1	13273.4	13083.2	11233.7	10787.8	11724.1	11383.5	13573.3	26190.4	10986.2	16078.1	23661.7	23474.6	17016.8	15419.2	13922.4	17096.3	20294.4	15997.2	11825.1	13482	16376.4	19724.2	17214.3	18639.6	8913.92	10747.9	17522.5	18951	21582.8	14524.9	13563.9	14959.5	15870.1	16563.9	19335.8
M112.08383T9.19	112.084	9.18723	-	-		32462.6	59213.8	57591.3	22488.3	34592.1	30732.2	43098.4	35923.2	22712.8	36879	29280.6	33543.3	13678.5	54527.5	37409.3	22246.3	35801.1	58571.7	38643.3	36709.9	40889.2	22665.9	20338.6	-6071.2	21868.2	37403.6	27103.5	39033	24928.2	38352	35416.2	45546.8	31983	23140	40756.2	50267.7	39128.6	40555.5	28380.2	31234	37233.5	37634.9	24858	38926.7
M113.03418T1.22_1	113.034	1.21905	-	-		19534.7	14031.9	11917.1	5025.38	9894.25	11738.7	15583.4	17643.5	11047.4	15771.5	13667.1	14075.6	11686.6	19843.3	17690.1	4404.79	15301.3	17290.9	18339.8	19055.5	9436.68	7814.92	15109.9	15237.8	16602.7	12241.1	14750.6	9545.44	6943.29	15023.1	15807.2	12010.6	17077.4	14592.6	16243.5	17639.9	13691.4	19326.9	7614.18	13250.2	14412.9	11865.3	15189.5	10002.8
M114.0661T0.96	114.066	0.960561	-	-	[M+H]+ 113.059	1.773e+06	1.72939e+06	1.69332e+06	1.00768e+06	1.50399e+06	1.67797e+06	1.98001e+06	1.48529e+06	2.01575e+06	1.70386e+06	1.16087e+06	1.7597e+06	1.10913e+06	1.06007e+06	1.28482e+06	1.58019e+06	1.29841e+06	1.60146e+06	1.30707e+06	1.21226e+06	1.18346e+06	1.82351e+06	1.33287e+06	979103	1.49945e+06	1.29939e+06	1.26584e+06	1.20761e+06	1.49161e+06	1.4763e+06	1.23278e+06	1.60055e+06	2.56488e+06	1.54236e+06	1.43541e+06	1.62353e+06	1.74394e+06	2.31783e+06	1.93919e+06	1.41222e+06	1.18167e+06	1.64119e+06	1.4603e+06	1.83491e+06
M115.06936T0.96	115.069	0.96036	-	-		77913.5	73221.6	65368.9	40578.1	60895.4	66253.9	81627.2	70028.3	86802.5	74964.7	51638.7	79643.1	51036.1	46571.2	57973.9	72799.5	57785.9	70241.7	58835.3	54953.8	52181.6	83288	61085.6	48921.1	68748.3	55238.8	55482.9	47635.6	59997.2	64197.1	53585.7	70751.9	104380	64161.8	64056.5	72510.8	74448.8	95127.1	89967.4	63157.1	49826.7	69530.7	65549.7	78662.5
M116.07059T0.78	116.071	0.782626	-	-	[M+H-CH2]+ 129.079	75818.1	89306.1	87349.3	112499	89680.7	110229	87994.2	111500	64588.4	99470.9	116168	93804.1	67299.7	114993	119574	83597.5	86806.3	88635.6	89040.6	110489	86375.3	72887	76149.3	153070	70921.5	99006	104194	94000.7	83997.7	74335	74119.7	170560	106889	67172	89274.2	75751.5	80160	80854.7	103304	118696	94815.3	74969.2	100546	74296
M116.07059T1	116.071	1.00286	-	-		4.43788e+06	5.62141e+06	6.32097e+06	4.2355e+06	5.72241e+06	6.00731e+06	5.91583e+06	5.50231e+06	4.04505e+06	6.04304e+06	4.68665e+06	4.3997e+06	5.27918e+06	4.61167e+06	4.76303e+06	4.89306e+06	4.34713e+06	4.77332e+06	5.44771e+06	5.1661e+06	4.64327e+06	4.68187e+06	3.89444e+06	4.8006e+06	4.2285e+06	5.32056e+06	5.56192e+06	3.34946e+06	5.09841e+06	4.81434e+06	4.43517e+06	5.24649e+06	6.28938e+06	3.61067e+06	4.36137e+06	4.43513e+06	4.36651e+06	5.45604e+06	6.00472e+06	4.46415e+06	4.53331e+06	4.96252e+06	5.90363e+06	4.0827e+06
M117.07398T1	117.074	1.00259	-	-		249325	324829	378085	246661	314200	331017	323225	306991	225105	348183	256345	245583	282349	251153	268831	268523	241610	252188	300290	285358	256371	261269	225902	259120	222294	294794	282392	186176	267145	253811	241334	264045	340207	189118	247192	247589	244956	298945	333073	237992	252543	269526	324225	221179
M118.04992T1.21	118.05	1.21221	-	-	[M+Na]+ 95.0683	265958	260586	262695	258074	257843	257921	-676751	-677429	270772	255682	259266	263462	265672	-676867	264997	-682763	259735	261334	259487	-676359	265240	-676794	260665	266338	294075	-681987	262244	-683871	261508	264194	262613	266483	1.06055e+07	-664571	256727	258940	258502	259613	268074	258736	-681596	263792	-676523	258765
M118.08628T0.94_2	118.086	0.935286	-	-	[M+H]+ 117.08	5.72802e+06	6.43285e+06	6.86258e+06	5.86911e+06	7.04626e+06	5.92645e+06	3.62057e+06	5.20156e+06	4.35476e+06	5.38687e+06	5.15496e+06	4.99861e+06	6.16723e+06	5.50805e+06	5.53244e+06	6.91943e+06	6.86224e+06	6.77128e+06	6.15626e+06	5.11524e+06	8.18878e+06	6.40196e+06	7.67631e+06	4.24369e+06	4.78356e+06	7.65093e+06	5.86322e+06	6.20833e+06	6.88245e+06	6.46816e+06	6.88988e+06	4.99036e+06	4.64154e+06	7.95185e+06	6.61217e+06	6.27347e+06	5.23562e+06	6.01516e+06	3.00086e+06	4.77703e+06	7.51115e+06	6.65788e+06	6.16037e+06	4.95742e+06
M118.08631T1.2	118.086	1.20465	-	-	[M+H+NH3]+ 100.057	1.37948e+07	1.63981e+07	1.60531e+07	1.65225e+07	1.59633e+07	1.54415e+07	1.58827e+07	1.46613e+07	1.45152e+07	1.55067e+07	1.45157e+07	1.40286e+07	1.5934e+07	1.5984e+07	1.81355e+07	1.5381e+07	1.52953e+07	1.52749e+07	1.80149e+07	1.77285e+07	1.6061e+07	1.35549e+07	1.51595e+07	1.53153e+07	1.16863e+07	1.62863e+07	1.78178e+07	1.39065e+07	1.45336e+07	1.37645e+07	1.37938e+07	1.28032e+07	1.24582e+07	1.24819e+07	1.14784e+07	1.47243e+07	1.51022e+07	1.48753e+07	1.45844e+07	1.28807e+07	1.52661e+07	1.4038e+07	1.64527e+07	1.32782e+07
M119.08965T0.94	119.09	0.936077	-	-		305270	328865	355605	299507	366914	301509	198238	265541	221759	297727	283161	280351	348999	300734	304391	382393	383054	367514	352942	280269	451465	349809	414795	232235	273194	399350	330263	344435	380911	366481	391939	280192	258841	464951	358491	359331	299919	340663	166956	273652	424728	370869	339587	268400
M119.08968T1.2	119.09	1.20479	-	-		729352	886522	818267	861498	840491	819142	816601	753093	736320	800034	813583	765501	880053	910634	1.01971e+06	850421	830915	828940	997383	993785	895418	758774	828629	825088	653201	858049	984315	743744	802166	765299	770260	697640	709088	695624	643543	831417	844475	825833	805053	703835	852143	769512	907453	747465
M120.06553T0.91	120.066	0.908061	-	-		65657	78872.9	70170.4	57319.3	66066.3	89233.1	80648.7	78645.5	61000.4	99853.4	39273.5	63536.8	57383.3	68002.5	76651.3	57927.9	42303.7	52170.2	83675.3	53063.3	42414.2	59788	44778.6	61730.1	43033	55624.4	78344.5	39965	41836.8	52554.3	53282.3	66050.1	79441.6	57685.1	43636.3	60305.2	50578.3	83252.9	82439.8	64970.8	67237.2	62799	66074.9	62362.7
M120.08085T2.4	120.081	2.40098	-	-		105785	105556	103389	92401.7	88237.3	100604	92176	72219.5	79372.3	67213.9	98753.5	88024.8	68535.3	104575	117305	96891.9	70230.3	81067.9	104965	78799	77550.5	106309	88281.5	122345	99041	107613	114663	116589	96079.8	75873.7	106532	76516.9	114716	69913.2	145344	132113	105809	107248	97569.6	88109.7	121682	99416.1	88701.4	90923.6
M120.08085T2.73	120.081	2.73247	-	-	[M+K]+ 81.1176 [M+Na]+ 97.0916 [M+H]+ 119.074	77970.3	112645	107544	84491.4	95531.7	94949.8	87992.2	68790.5	79846.5	64990.5	100480	89324.7	61254.6	95499.9	104564	64404.2	41424.3	83775.8	105586	77048.1	56877.9	112879	90750.6	53010.5	85613.1	91135.9	116374	107588	61670.9	62098.3	84019.1	78812	106703	43936.8	118303	122723	84128.9	108617	89867.1	80729.6	106396	62996.2	76094.7	90568.5
M120.08087T6.15	120.081	6.14751	-	-		334941	302127	295248	297525	310954	330700	301252	239868	246537	283185	236649	214566	255651	276082	274980	275965	210832	268064	284626	314078	230950	301714	261275	312840	266880	255370	263397	270606	280863	250624	267865	241878	306530	207810	306040	328023	280976	293689	291913	260597	289173	275174	301740	239854
M120.09101T1.2	120.091	1.20307	-	-		77219.1	89671.3	77556.3	78943.5	85431.5	72319.6	76730	67520.7	76413.7	73967.2	76338.6	69599.6	78964.4	79499	87253.3	78815.5	75245.2	73734	87756.3	84436.5	80839.5	64289	75191.2	78844.9	62230.8	84772.8	94787.1	67427.4	83179.8	75621.1	13267.4	60750.8	70723.9	71411.8	60736.2	71429.2	82542.8	75824.3	79082.8	73662.4	81703	71567	83566.2	72461.8
M120.96612T0.9	120.966	0.899768	-	-		12130.7	15250.9	18008.5	9457.18	14883.9	11130.9	11202.9	14993.1	12763.5	13426.5	11926.6	11245.1	10279.4	13175.3	10947.3	12690.5	13570.3	18445.7	14083.1	14695.6	11751.2	14910.5	11905.9	11973	11789.5	12060.6	11813	11052.9	14881.2	11618.3	12175.1	16143.7	14608.7	12671.9	12001.4	13091.9	16383.1	17080.4	15826.5	13466.7	11835.6	11463.8	14647	11148.6
M121.02854T7.6	121.029	7.59549	-	-		4308.24	4806.91	4021.13	3320.67	5050.61	5518.14	5011.04	4825.52	4948.03	4230.37	2718.38	3794.36	4668.65	4124.41	3266.19	4360.45	4471.83	3923.84	5274.73	4759.61	5621.5	5429.07	6439.64	3741.73	4411.25	2813.84	5611.56	5451.49	4594.17	5018.93	4349.11	4199.91	4167.25	3645.95	3812.45	4378.47	4687.61	5174.78	3628.7	4464.88	5278.51	3063.45	3101.76	3945.4
M121.07198T0.96	121.072	0.957191	-	-		101022	110276	151905	100277	88678.1	95284.7	128813	100047	106846	99928.4	119613	109559	105625	121036	146502	128167	106345	151379	120181	131930	103694	107342	107085	108876	140078	105069	140556	104306	127746	75666.6	109526	94556.3	119946	107357	124184	150723	107104	120079	124873	123914	114117	121153	114059	111341
M121.08422T6.15	121.084	6.14728	-	-		28647.4	24844	25504.7	24834.8	24751.4	25522.5	24127	18469.6	19605	20824.4	19281.4	20733.8	20096	25987	24121.8	20954.7	17775.8	23387	22792.2	25743.9	18650	22818.2	22355.4	26747.7	21391.5	23533.2	25082.2	21719.9	24886.4	21606.5	23897.6	19289.8	26039.7	18782.7	26860.7	25107.5	23653.7	25983.9	24917.4	22190.6	27190	27342.1	28325.5	20784.9
M123.04439T1.22_1	123.044	1.21822	-	-	[M+Na]+ 100.057	35284.9	45895.6	34372.4	34075.2	43639.6	54186.2	35249.7	34763.6	29051.7	46986.8	45887.7	35553.1	25940.3	38508	55462.8	43924.3	33867.1	32857	30569.8	36747.7	34328.3	39484.1	34019.6	28755.4	34206.1	40528.9	42803	37799.6	39391	32565.3	38549	40509.8	44592.8	30466.1	35105	50149.3	36530.2	41739.7	42712.4	29508.8	45786	42793.6	35135.5	33038.6
M123.05533T1.22_2	123.055	1.2154	-	-	[M+Na]+ 100.057	115983	98844.3	164413	152308	139937	174455	165019	240215	105327	205531	115378	172445	105164	168961	201062	190991	168707	221180	115894	185908	116195	152959	168580	163153	169193	159731	161270	155072	119717	120646	139333	363370	168743	169664	108737	184021	182370	164399	170620	104931	160577	158982	149515	133629
M123.92801T0.84	123.928	0.844123	-	-	[M+K]+ 84.9642	4190.97	3193.78	3643.34	4232.34	4896.37	4171.82	5495.11	3504.77	3716.97	4129.06	3070.39	2994.01	4680.14	4110.37	4043.54	3296.85	3440.37	4058.29	3755.72	3330.86	4320.85	3865.12	3726.54	2979.25	3795.43	2814.2	2847.11	4265.14	3018.6	3089.42	5116.03	3624.34	4368.14	4056.26	3476.39	2954	4294.28	5242.92	4494.52	3276.57	2556.91	3526.56	3092.19	2349.5
M124.02436T0.74_2	124.024	0.741732	-	-	[M+Na+HCOOH]+ 55.026	26251.9	23434.6	22972.5	21247.6	21482.9	25592.6	22030.5	18177.2	24863.3	23110.6	20256.3	23832.6	23252.8	23663.7	28244.1	26044.3	22687.8	24448.6	23851.8	23470.3	20966	27594.1	19989	25357	25537.2	26043.8	24224.1	24739.7	28656.3	21404.1	22532.8	21503.4	25630.2	20923.7	26485.4	23183.2	23966.1	27040.2	25989.6	19796.6	20532	24561.9	23331.2	23189.7
M124.50024T0.74	124.5	0.741832	-	-	[3M+2Na+K-H]2+ 55.026	8148.54	7770.19	8434.53	9243.41	7372.31	9051.01	8899.98	8888.11	9524.91	6378.46	7595.32	8664.57	7832.89	9856	9554.81	9581.31	11298	6917.96	10222.4	6519.64	7891.63	7407.17	8357.61	7339.52	7154.23	10071.3	9285.92	5697.58	9313.32	7554.2	5823.1	7408.5	6898.28	7284.03	6205.31	8794.12	8628.24	8139.98	7397.4	4399.19	7487.33	7959.04	7275.59	7118.77
M125.98622T0.74_1	125.986	0.738001	-	-	[M+Na]+ 102.993 [M+Na]+ 102.993	6.6254e+06	6.31566e+06	6.69e+06	6.0961e+06	6.51757e+06	6.78922e+06	6.78969e+06	5.99643e+06	6.71242e+06	6.37034e+06	6.2075e+06	6.24052e+06	6.37392e+06	6.4141e+06	6.25467e+06	6.47485e+06	6.3602e+06	6.34336e+06	6.58023e+06	6.32953e+06	6.59659e+06	6.55725e+06	6.66994e+06	6.33039e+06	6.08077e+06	6.05433e+06	6.50689e+06	5.84831e+06	6.03519e+06	6.34321e+06	6.05329e+06	5.50182e+06	6.62379e+06	6.48394e+06	6.38536e+06	6.39083e+06	6.26968e+06	6.27344e+06	6.45886e+06	5.26568e+06	6.47412e+06	6.452e+06	6.18195e+06	6.43048e+06
M126.0663T1.21	126.066	1.21363	-	-	[M+H-C5H8O4]+ 257.098	15154.8	11521.6	12135.6	11129.8	9902.69	12066.7	11257.4	10541.7	13752.9	14755.1	12329.7	13554.3	11839.9	10599.9	11478.9	14345.7	10616.6	11776.2	13346.1	7407.12	12167.8	14242.4	15513	11782.4	13863	15414.7	11669.2	12600.4	13406.4	8944.4	18474.7	10116.9	12436.2	15047.9	15670.5	20192.8	9260.71	11819.8	11235.3	10368.5	19147.5	15629.9	9434.02	13118.5
M126.9895T0.74_1	126.989	0.739164	-	-		214004	229850	213407	210656	212488	227165	227979	200222	229590	209302	197771	201506	206786	203014	203627	212338	206179	214529	214104	213931	214540	209262	218925	220474	213724	219926	232392	208209	210121	233102	210724	200154	226225	218907	219834	204928	210435	218357	225467	185521	224641	220081	212156	224481
M127.03699T1.23	127.037	1.23207	-	-	[M+H-CH4]+ 142.063	16622.6	35265.3	30446.5	18128.1	31608.5	21549.8	14833.7	20139.9	-342.047	23589.9	25987.6	25371.6	20135.4	15327	18900.2	20751.3	20927	18052.6	12989.1	21418.4	-840.014	13085.2	3396.93	31189.4	5945.28	20194.2	18902.7	19259.5	20098.6	25585.6	29800.6	18758.1	23317.9	21866.7	16369.9	19426.7	18966	3906.89	29770.4	18240.8	21612.7	19560.5	14568.9	3460.6
M127.03895T0.93	127.039	0.925751	-	-		46306.2	46933.5	46363.9	32308.4	51043.7	44567.1	48477.4	46281.3	49957.5	51384.7	34877.4	47056.9	34286.4	27365.7	37536.5	48698.5	41060.1	42361.8	34202	42610.5	35197.7	45734.8	40512.4	38603.9	34282.4	36591.2	38857.8	30187.1	41320.4	41213.4	38783.6	33464.6	47746.7	38435.3	32492.6	38536.3	38779	47178.5	47477.9	36323.4	34939.5	42352.4	41994.5	37970.4
M128.01946T0.74	128.019	0.741833	-	-		976126	807061	945489	736371	866593	894853	981897	873681	950976	940867	883562	932012	828214	856475	914484	966300	888805	820090	867444	770212	797257	902933	808865	832558	895394	949917	887569	868695	1.01205e+06	841360	822139	832843	894115	815886	784229	977751	997779	946725	1.01656e+06	729260	918786	1.02041e+06	952098	935696
M128.07067T1.15	128.071	1.15111	-	-		17865.3	26465.9	22605.3	28034.3	30496.4	15958.8	24499.4	19778.6	15582.5	7389.29	32356.6	11489.8	17102.5	20326.2	25813.4	24057.9	22157.7	20478.3	35863.8	33847.9	17402.9	18390.4	18744.3	26829.2	3409.29	17038.7	36477.9	17903.8	19413.6	17186.5	14202.5	12524.4	20951	12201.2	6228.58	21768.3	35570.1	16382.3	16294.5	21015.1	20685.1	22632.7	20225.6	17820.3
M128.55206T0.74_1	128.552	0.740622	-	-	[M+2Na]2+ 211.138	3418.08	3880.04	3926.13	4371.89	4290.54	3889.72	3489.73	3874.2	3984.23	4925.75	4782.02	3671.44	4794.88	6340.29	3310.4	4524.8	4379.5	4195.68	5385.86	4873.65	4316.41	3446.68	4698.37	5577.98	4309.78	4794.07	4867.83	4442.34	5005.93	4685.74	5443.42	4458.07	5017.12	4940.05	4988.67	4194.08	5630.52	4188.14	4043.46	5723.55	4868.67	6114.91	4284.58	4656.91
M129.0659T0.98	129.066	0.980186	-	-	[3M+2K]2+ 60.0704 [M+Na+HCOOH]+ 60.0704 [M+H+HCOOH]+ 82.0551	90886.6	109581	85988.5	45671.6	87514.5	161616	123069	85147.8	92873	207239	57467.6	76746.1	62229.1	69132.5	104764	93019.2	65497.5	96845.2	100466	72853.1	84457.8	133539	81066.2	62476.5	86748.9	97237.8	72401.4	46222.7	121204	97687.4	52018.4	135494	185155	113807	65815.2	154825	96213.7	124741	106339	75363.9	57836.5	77353.6	97698	100579
M130.04984T1.7	130.05	1.69808	-	-	[M+K+HCOOH]+ 45.0812 [M+Na+HCOOH]+ 61.0551 [M+H+HCOOH]+ 83.0371	36927.2	44979.6	40232.3	-605.404	37428.4	38164.3	33296.2	42515.6	38059	64059	27254.6	42916.3	34742.3	41617.3	35040.2	39615.5	29746.2	38323.4	40184.5	35316.3	47461.5	39421.9	43460.6	35019.7	26777.5	42637.8	62892.9	32351.6	43868.9	43529.5	34491.9	43249.2	37052.6	43263.5	32211.3	38828.2	60528.2	35619	34224.9	30273.2	35152.7	34008.6	36719.6	37802.5
M130.04994T1.22_1	130.05	1.21716	-	-		321542	313444	295224	18385.2	298751	249200	290998	350089	329983	441462	213889	375927	286065	311009	317622	330129	306423	316438	299325	283393	404850	321293	391772	261680	314457	351406	476693	315629	390588	332142	396252	350638	309974	403356	335135	325732	557720	341742	260172	258527	292455	282886	282508	357982
M130.0499T0.9	130.05	0.898798	-	-	[M+H]+ 129.043	95783	104083	105543	88778.3	125277	90480.9	90155.5	109376	106861	110279	77197.1	103822	107076	102286	105273	80645.9	83659.8	94483.3	108302	103876	89752.1	82346.8	73990.5	81726.4	79502.1	90567.3	101972	87211	105019	81229.6	78175.5	57594.9	98117	64844.8	78084.7	106646	94523.4	98753.1	107892	90995.4	77967.7	81507.9	123910	86686.6
M130.06512T7.57	130.065	7.57218	-	-	[M+H-CH2]+ 143.074 [M+3H-CH3]3+ 402.201	28536.9	29925	20288.6	18508.1	27016.3	26529.9	25188.6	25995.5	24505.5	27965.5	21741.6	21170.2	27780.8	23506.4	21695.4	20273.8	21610.7	22065.1	25269.3	23648	20826.9	20872	22833.6	28412.1	24563.2	21242.5	25286.5	20675.7	19925.9	19088.7	21453.5	18437.4	24439	22650.5	19185	22163.3	23217.2	22370	19832.1	21303.2	23834.6	24851.8	21493.2	18881.8
M130.08635T1.21_2	130.086	1.21184	-	-		200522	265111	255539	149041	211206	195049	217276	205960	226371	209439	184156	194642	199498	202742	223984	196179	206672	250746	213970	229841	193436	213101	213671	227065	250701	213651	201776	197530	192010	193306	211189	199392	198020	186993	218843	195474	185704	153778	202517	193823	175622	226072	250320	188251
M130.08639T0.78	130.086	0.78216	-	-	[M+H]+ 129.079	29161.5	36811.6	44103.3	49674.4	50727.4	38087.9	37265.5	36247.7	27011.4	33977.1	44328.3	28672.2	25157.6	44533.3	46758.5	35993.9	33345.1	23976.9	40013	41032.8	29742.4	36396.6	23470.6	50924	25833.7	31170.1	48925.9	31158	32339.8	31494.9	32073.5	39862.2	41587.1	16390.8	32888.3	26623.9	30131.8	38049.8	34032.5	46091.5	35582.3	29888.2	40503.5	20801.3
M130.0864T1.04	130.086	1.03645	-	-		29507.5	33711.1	95113.3	27995.3	55620	29154.5	30614.6	31043.9	30166.3	29905.2	39693.9	26203.2	-8345.63	31075.5	-2290.59	28569.2	36712.9	30070.4	32799.1	32559.1	33008.8	31757	15947.7	163435	53712	34347.4	28989.4	30931.1	28309.8	-4930.4	31106.9	5349.92	40129.4	28157.8	25427.7	-28829.1	35486.5	-28779.7	37738.5	27945.8	31403.9	68051.6	33955.7	54202.7
M130.96525T0.74_1	130.965	0.738891	-	-	[2M+K]+ 45.9982 [M+K+HCOOH]+ 45.9982	46726.9	50907.7	52371.8	38945.6	45560.9	49051.5	47772.6	41866.8	47138.4	43558.2	42651.5	44219	40710.2	38727.9	43527.8	45483	36821.3	49348.5	43843.4	48172.9	40231.2	44269.8	40008.8	44579.8	40485.2	42141.4	43573.4	37903.9	40660.9	40743.6	41091.7	39758.5	47543.5	42007.7	39674.3	42316.6	39735.2	49756.9	46919.5	36819.7	44755.3	39404.7	37454.9	39360.2
M131.01135T0.7	131.011	0.703307	-	-		44111.9	48343.4	56310.7	7798.57	9481.74	52703.1	45170.3	39193	44528.4	6958.44	39987.2	47812.1	44507.8	36016	9469.43	42853	40324.8	53003.7	41193.5	45575.5	37537.6	41625.1	43798	48424.3	44033	39471	47158.7	35182.1	37972.5	44541.7	38408.5	43544.6	44938.5	39335.5	43212.4	46133.7	43274	53664.2	44306.9	34084.7	42116.5	43186.6	34727.6	43141.5
M131.05321T1.22	131.053	1.21774	-	-		21616.3	21695.3	26520.3	3147.55	18723.1	18524.5	18279.6	22122.6	20494.5	29940.1	14737.1	29959.9	17828.6	18382.4	20147.2	19687.2	20138.5	21317.8	19884.3	21472.7	29499.6	20025.2	22276	26961.1	19818.1	20552.3	27717.2	21348.5	21747.1	17761.5	22587.3	20396.5	18209.7	26669.9	18438.8	20456.1	28128.5	17007.5	14712.4	15747	20866.8	17013.1	17242.1	19768
M132.06581T1.23	132.066	1.2307	-	-		1.40644e+07	522464	-1.21946e+06	633248	-1.23677e+06	639701	1.59531e+07	291734	496418	627373	493616	642987	-1.23952e+06	647226	1.69803e+07	288252	871624	1.30835e+07	510942	520335	521319	289401	-1.05465e+06	-1.21933e+06	614718	552614	638084	286990	498549	-1.22066e+06	798633	-1.22328e+06	396895	300406	633556	-1.11201e+06	634214	1.52753e+07	500470	496381	295431	-1.22853e+06	452811	-1.22613e+06
M132.07687T1	132.077	0.995836	-	-		5.83566e+06	9.3245e+06	7.78937e+06	5.18232e+06	5.96574e+06	5.75321e+06	6.42636e+06	7.01929e+06	6.09752e+06	3.87037e+06	5.0497e+06	5.27394e+06	5.53777e+06	7.55867e+06	8.54163e+06	6.56555e+06	6.32558e+06	7.80505e+06	8.18057e+06	7.2216e+06	5.7874e+06	6.63303e+06	5.28096e+06	5.06424e+06	4.17933e+06	7.84907e+06	7.32826e+06	4.48602e+06	4.22735e+06	4.90745e+06	6.4251e+06	3.80576e+06	3.52775e+06	4.81411e+06	5.11146e+06	4.27971e+06	7.32732e+06	1.05416e+07	5.14111e+06	4.14498e+06	6.1259e+06	6.25677e+06	6.06003e+06	6.31643e+06
M132.10187T2.23	132.102	2.23114	-	-	[M+K+HCOOH]+ 47.1332 [M+Na+HCOOH]+ 63.1072 [M+H+HCOOH]+ 85.0891	470814	477789	536860	527728	516806	610510	461146	430753	389837	495292	421272	325398	410274	538386	431350	376766	388269	366350	501305	462441	459539	448929	416918	615744	377731	522981	641730	364367	495821	419584	385740	371760	462504	360225	336335	434132	431097	447881	477194	405656	509505	423486	459612	372822
M132.10197T1.22	132.102	1.2181	-	-	[M+H+HCOOH]+ 85.0908	1.8486e+07	1.84934e+07	1.83186e+07	2.29377e+07	2.00931e+07	2.32498e+07	1.77131e+07	1.56217e+07	1.63069e+07	1.84584e+07	1.54677e+07	1.40299e+07	1.66375e+07	1.82219e+07	2.05022e+07	1.85103e+07	1.75911e+07	1.32888e+07	2.03049e+07	1.59131e+07	1.77176e+07	1.85489e+07	1.73968e+07	1.87913e+07	1.4074e+07	1.89517e+07	2.18716e+07	1.48722e+07	1.86054e+07	1.55873e+07	1.68308e+07	1.44474e+07	1.8744e+07	1.52021e+07	1.24569e+07	1.74652e+07	1.93168e+07	1.85103e+07	1.74527e+07	1.44025e+07	2.03279e+07	1.78397e+07	1.89493e+07	1.59867e+07
M132.99824T0.74_2	132.998	0.741153	-	-		8296.71	6332.2	7716.44	6321.44	7008.99	9221.7	8226.55	8458	7872.57	8896.32	8063.43	7768.52	6274.85	7105.48	8507.14	8846.75	7322.51	7839.44	8094.67	7471.52	7135.95	7059.67	7158.18	8252.98	6688.92	7954.02	7512.71	7622.96	8985.78	7783.02	7550.66	6460.3	9383.73	7797.21	8437.72	9338.21	7325.04	10113.5	9262.79	6238.52	7601.33	9204.75	8542.09	8250.96
M133.03181T1.43	133.032	1.42586	-	-	[M+K]+ 94.0686 [M+Na]+ 110.043 [M+H]+ 132.025 [M+H-NH3]+ 149.051	5748.48	6209.9	8188.21	4670.07	9747.76	8382.74	5481.56	6890.8	5530.77	9229.15	5527.11	4657.19	4306.84	7317.34	5725.58	4848.15	5320.68	4668.79	6789.48	5491.42	5523.84	5356.4	4064.68	6547.03	6429.3	6737.66	7203	5596.79	6810.21	4618.98	5821.85	7140.19	7837.93	3172.43	4791.75	5512.71	5657.05	6345.79	7696.69	6966.87	8302.61	7531.16	7844.56	5148.72
M133.03189T1.21_1	133.032	1.21485	-	-		144858	135359	168731	102722	167553	208465	154642	182702	141772	201306	151112	140978	97899.7	159922	181222	143549	122738	100651	153295	130704	117042	137637	121971	154254	182134	174755	159275	142192	184143	109469	133483	176470	192184	120129	180883	182062	145759	160368	208149	161618	174105	192359	139617	139779
M133.07998T0.99	133.08	0.994959	-	-		296416	448736	375892	246849	296331	287414	322737	353448	295706	188697	238148	245831	264928	347846	439358	339730	318046	386552	417894	343266	277684	303782	246228	260406	220316	391053	370484	219317	215851	244267	323715	187326	185404	232171	256183	207983	350155	504700	243508	201691	301048	293508	286057	304932
M133.10517T2.23	133.105	2.22741	-	-		33783.2	33808.5	39939.1	36494.8	37112.4	42192.6	30853.5	29949.5	28272.6	33879	28273.8	24598.8	29117.6	36649	28298.1	25942.6	27127.6	24281.5	34664.1	31329.5	29030.1	30485.2	24749.3	40349.2	26422.9	34420.5	41118.8	25039.6	32664.4	33297.9	27546.7	25775.4	32256.3	25847.8	22899.3	31167.6	35445.6	31064	34297.6	30550.7	43843.2	33448.9	33349.8	25647.2
M133.1052T2.54	133.105	2.53721	-	-		40178.5	38165.2	44451.5	48188.6	42148.1	47531.9	36801.5	39313.6	33494.7	41874.3	37591.9	28885.8	36136.7	50021.8	47362.4	37611.1	35182.7	33436.4	43962.1	43986.7	44151.5	41037.5	34522	47749	36912.6	40739.1	55028.1	31102.5	39787.7	36829.3	37904.9	37260	45153.6	31779.4	31027.3	38786.1	39214.9	41090.1	42232	36133.4	43407	44151.1	42157.6	32625
M133.10531T1.22_3	133.105	1.2181	-	-		1.19865e+06	1.21983e+06	1.18731e+06	1.49892e+06	1.32822e+06	1.50635e+06	1.15991e+06	1.03275e+06	1.10378e+06	1.20329e+06	1.03617e+06	958359	1.0872e+06	1.28883e+06	1.47248e+06	1.34551e+06	1.23905e+06	955577	1.47311e+06	1.02991e+06	1.16221e+06	1.2073e+06	1.12987e+06	1.27414e+06	997713	1.32023e+06	1.52271e+06	1.02965e+06	1.29445e+06	1.09322e+06	1.15518e+06	1.0136e+06	1.26938e+06	1.0229e+06	822373	1.17073e+06	1.29661e+06	1.24085e+06	1.15317e+06	968414	1.31709e+06	1.19439e+06	1.23309e+06	1.06454e+06
M133.97607T0.74	133.976	0.737912	-	-		10694.8	13661.3	13541.9	10603.8	12305.7	12010	12936.2	11012.2	12103.7	13884.1	11975.5	12036.4	12293.1	14355.2	11050.8	13090	11815.4	12518.4	11617.6	12859.1	13238.5	12039.3	12030.3	12862.1	12971.1	10937	13378.7	12529.2	13364.1	11228.2	13056.4	10567.7	12627.7	12428.4	12517.2	13879.2	10917.2	13484.9	11847.9	11379.2	10837.2	12513.5	11599.7	11493.7
M134.06015T8.39	134.06	8.38944	-	-	[M+H-HCOOH]+ 179.058	8464.19	10210.4	12924.6	8935.44	11529.3	10734.1	11778.4	11040.8	12114.9	9359.64	12565.8	9991.49	8657.83	12963	10391.2	9032.51	10308.9	13049.9	11512.7	10805.4	10769.1	9894.75	11624.3	6741.51	8998.72	10800.5	9223.18	9389.47	9076.26	10368.5	10779	8878.34	10005.5	9825.53	9510.93	11984.2	11696.2	9673.34	10252	9622.09	9173.91	10761	8851.55	10027.3
M134.08124T0.99	134.081	0.994446	-	-		42421.7	61892.1	50573	32993.4	41111.6	43092.3	42960.4	51405.9	37533.1	33181.3	32900.5	30540.9	37035	45708.2	49277.1	39258.4	41013.7	45437.5	46533.3	44558.8	37465.4	44609.7	36843.7	39572.4	33200.8	58594.1	57109.3	34344.7	36737.7	35426.4	45750.9	31580.4	33820.2	37973.8	34427.7	40552.3	47490.4	68015.6	37827.3	30087.2	41441.3	44481.8	47325.8	47531.8
M134.0812T1.19	134.081	1.19248	-	-		24505.3	23819.6	24769.9	118313	30044.9	4619.9	27025.7	20731.3	18382.9	7013.89	14545.3	77999.4	21533.6	23483.7	24447.6	24705.9	93166.5	-1149.35	18045.2	22274.8	88608.6	117496	16810.5	118240	32181.1	18742	9572.62	21029.9	16127.9	20308.3	19353.9	20138.4	32734.2	19801.5	1325.98	27568.5	1121.08	27604.6	24063.6	72112.2	18154.1	21991.8	25091	17811.4
M135.11694T13.97	135.117	13.9688	-	-	[M+2Na]2+ 224.258	4600.69	6790.17	6090.74	7201.32	6505.82	7524.96	9319.04	8694.36	9604.33	7388.31	5169.89	4719.02	9438.14	8708.74	8886.41	9735.16	9894.24	11422	11130.1	7025.79	4607.88	5401.41	9032.3	9945.7	5636.52	9794.75	8357.19	11276.3	10201.3	7984.31	5406.2	4664.65	5546.28	6762.77	8844.19	7728.48	8320.2	7044.2	8462.84	7880.28	2281.07	5127	2979.73	5077.68
M136.00807T0.74	136.008	0.737912	-	-		24960.2	25812.3	28897.5	28699.2	24965.7	30744.1	30962.5	25091.8	27194.6	28409.6	30716	28193.6	30903.1	33037.9	27693.9	28309.9	32641.8	22291.5	30153.5	19831.8	29509.5	28124.4	27368	28686.4	31385.2	37229.8	32623.1	27393	30782.8	25905.2	29213	28925	28368.8	31318.9	28100.3	33993.6	32751.7	26235	29064.8	23952	34950.3	33023.6	27899.6	35921.7
M136.04275T1.11	136.043	1.10783	-	-		23285	22587.9	30625.6	21338.8	19227.8	23612.6	23876.9	18221.8	24325	22377.6	19454	17454.1	21558.4	19891.1	28051.3	22222	21981.3	13204.4	20960.6	29667.8	21612.8	23654.8	15920.3	28580.4	20643.6	16635.3	22985.5	21530.4	16054.3	18222.3	18244.4	13457.1	23224.4	17319.1	19002.4	25725.6	18593.4	24385.3	32310.9	20758.5	18116	20452.2	32722.8	20876
M136.04811T0.95	136.048	0.947013	-	-		43527.3	48785.6	63462.3	35767.7	41978	41405.9	50821.4	41808.1	42074.8	42983.2	39884.1	47953.9	38811.6	37849.5	37735.9	40376.4	41452.1	50175.2	38144	44649.3	47960.1	54606	40115.8	34354.8	44793.6	35404.2	43128.3	37979.4	44679.5	47752.6	35277.2	44131.4	61016.6	44742	46246.3	46007.4	42079.1	43178.3	51726	52161.4	34463.7	43103.5	42114.3	45199.2
M136.07583T1.22	136.076	1.21726	-	-		113980	139587	109008	119958	149746	176886	125081	109610	120839	153179	118238	115235	77432.7	129035	169001	138469	100629	94893.7	136542	112047	108541	130005	111929	111969	120245	122616	123261	119324	126902	87106.1	121360	115402	135133	97419.9	124175	162152	119509	139909	146684	107847	151917	149003	116897	104896
M137.03079T8.83	137.031	8.83008	-	-	[M+H]+ 136.022 [M+2H]2+ 272.047	2743.87	3089.24	4299.16	2565.95	3313.73	4027.35	2258.38	3274.12	3552.98	2275.93	3269.6	3274.45	3202.43	4144.68	3848.98	3647.58	4370.72	3177.7	3738.58	3479.65	3550.2	5591.36	3472.12	1270.08	4679.2	2908.07	3128.56	3579.72	3009.96	3448.69	3607.76	3942.19	2508.63	2728.44	2102.18	3132.96	3645.19	3565.11	3208.59	3530.44	3765.52	3847.68	3541.2	4084.23
M140.06816T0.92	140.068	0.9238	-	-	[M+Na]+ 117.08	14831	15613	17790.7	11633.3	19967.5	14491.7	6106.66	9825.69	9144.85	14949.3	7339	12967.5	10653.1	6804.23	9605.95	17252.3	10589.4	11656	11148.8	10555.9	11476.4	13130.7	14614	7776.8	7370.26	12115.1	9740.39	9355.44	12676.4	3864.23	10892.8	7418.16	7825.98	15549.6	8378.95	12742.8	7045.9	12806.7	8224.19	6296.72	14538.2	11318.8	13516.2	8017.17
M140.15162T14.11	140.152	14.1066	-	-		788.384	1216.01	1437.67	1139.44	1594.43	1548.61	1658.98	2105.01	1594.4	1671.28	889.822	996.629	1303.54	1675.89	1639.83	1791.61	2051.51	2488.34	2240.29	1670.27	967.012	916.05	1594.05	1536.23	1615.28	1683.25	1331.57	1493.98	2481.34	1588.03	1130.74	1215.09	1738.7	1251.39	1522.51	1528.94	1528.97	1976.29	1873.94	1476.99	352.056	816.9	1136.98	1243.17
M142.08634T1.21	142.086	1.21196	-	-	[M+Na+HCOOH]+ 73.0914 [M+H+HCOOH]+ 95.0683	4578.49	6516.35	5000.64	5918.78	5078.73	5766.43	4226.75	6706.86	5931.92	5790.54	5364.18	4180.57	4337.86	3020.44	7589.26	6206.97	5626.9	5212.85	5270.79	6019.17	4500.76	5987.02	5552.42	6112.78	5057.38	4463	5455.26	6317.83	6581.1	4684.04	5564.8	4757.27	6181.83	4458.94	5325.11	8133.85	5241.01	3639.53	5857.16	4171.76	4413.55	4679.63	5545.79	3982.14
M142.94795T0.87	142.948	0.873198	-	-		42398.4	34550.2	41618.2	36046.4	38677	39142.8	35270	47441.2	34201.1	47698.9	31196.6	33299.4	30907.9	31490.8	38058.3	35584.9	46216.5	51420.2	42608.8	43102	43729	50297.5	50550.4	38799.6	31248.5	48517.9	47012	48650.1	62496.3	35658.2	45258	42732.2	47004.7	38350.8	33242.3	47274.3	56669	47791.8	46208.7	35972.5	38351.3	41251.3	29041.9	39784
M143.08161T1.06	143.082	1.06046	-	-		21405.7	28399.8	31724.6	25823.5	23892.8	22638	24755	20929.8	29647.3	28476.1	21979	23534.9	19305.6	21118	29840.4	25296.6	21917	23172.6	29007.8	29175.4	23957.1	27789.5	20438.7	27626	26600.4	20996.3	25228.3	25510.8	22459.7	28684.3	29279.8	24168.2	26226.3	22563.7	25723.4	27102.7	26408.2	22067	24840.8	25811	21193.6	21600.5	37758.4	26862.7
M143.99694T0.74_1	143.997	0.738298	-	-		806529	847458	847463	812346	846813	842243	841307	794006	843587	912484	879578	825593	868294	873611	798696	849461	826202	780594	902691	779925	813275	836944	851125	749845	781567	790850	922164	804026	817625	856969	803805	759376	890354	866057	823776	849751	833745	835852	868256	718847	852454	874715	835603	875698
M144.10196T1.2	144.102	1.20218	-	-	[M+H-C2H4]+ 171.127	107712	125160	228426	87238.1	161280	101396	130313	142493	151655	130395	105182	114331	129557	88668	-1358.17	132185	122040	122063	143787	117038	101194	101871	62088	197067	117028	158803	127138	101359	108565	101354	138599	85684.1	146520	99601	96254.1	5221.22	147017	-15343.5	95911.7	115963	104435	272717	85416.8	182011
M144.49748T0.74_3	144.497	0.738805	-	-		3484.95	3231.2	2633.76	4178.38	3029.56	3045.7	2925.79	2929.19	2863.6	3770	3072.48	2797.52	4056.13	3806.15	4262.08	3468.09	3012.41	3211.04	4784.85	3705.59	2977.91	2637.57	3357.5	2730.39	3547.08	3006.33	3767.68	3418.33	3321.17	4035.04	3383.38	3175.75	2904.12	3356.61	2721.38	3186.78	3120.17	2826.25	2969.24	2820.09	3393.81	2492.19	2934.59	2700.76
M144.99218T0.74_1	144.992	0.73541	-	-		115939	112847	117137	111881	115505	114421	115719	111263	118340	108716	109592	113930	111757	112660	110655	113936	112734	120457	112465	115315	115726	113832	117914	112150	109575	115773	112236	110485	108322	118204	111752	110634	116374	117541	117045	119335	114343	116665	121937	116927	121765	110443	116569	120834
M145.0351T0.74	145.035	0.742837	-	-		115939	112847	117137	111881	115505	114421	115719	111263	118340	108716	109592	113930	111757	112660	110655	113936	112734	120457	112465	115315	115726	113832	117914	112150	109575	115773	112236	110485	108322	118204	111752	110634	116374	117541	117045	119335	114343	116665	121937	116927	121765	110443	116569	120834
M145.04943T0.93	145.049	0.925711	-	-	[3M+2H]2+ 96.0225	55044.4	60832.3	61479.2	43921.5	58112.1	54447	53030	50819.6	55349.4	53025	42482.3	50494.6	41969.8	38843.3	48869.8	47747	45963.3	49709.3	41530.6	58358.4	43148.7	53970.7	45689.6	46253.7	41496	51168.2	45853.9	37764.4	51005	47238.7	50104.9	47063.1	55796.3	54345.3	45168.3	47818.9	51915.3	59677	61895.8	44755.3	47741.4	51352.2	55941.2	50001.6
M146.03024T0.74	146.03	0.742261	-	-		48232.3	45445	47369.7	38293.3	46090.2	47507.5	50264	49722.5	51632.4	53363.7	50376.4	46364.8	48979.9	48688.6	46834.1	51400.9	46336.4	50404.4	45427	44201	41651.5	44422.7	42887.3	43784.1	55350.6	55704.8	52468.7	51706.2	65175.3	52917.7	52920.6	51193.3	52121.8	46087.5	44684.4	49643.3	54969.7	51358.9	53293	44712.6	45258.8	58606.4	51313.7	51227.6
M146.06021T7.57	146.06	7.56989	-	-	[M+3H-C4H8]3+ 491.217	12750.7	10791.4	12340.6	8290.27	13139.4	13743.5	13776.1	11648.6	11685.4	15074.7	11833.7	9128.44	14498.7	13173.8	9684.57	10779.2	11231.3	10557	13646.3	9571.6	10153	9552.51	11682.7	14480.9	9374.6	8655.53	14732.9	9277.54	11002.3	8879.51	9821.86	7392.6	11848.9	13536.5	7221.46	9901.09	11496.9	12952.4	11270	11491.6	14296	11517.5	10985.2	10631.6
M146.08116T1.22_1	146.081	1.22467	-	-		16509	17227.5	14254	11625.7	13588.9	21216	17328.7	12321.7	16198.5	12888.9	15063.5	13834.7	14390	16604.3	14796.7	14821.9	21922	13002.4	21785.9	14583.8	23074.3	19899.6	16063.2	22578.1	20694.4	22446.9	19646.5	17926.1	15573.4	21212.5	15767.2	18286.1	15826.6	18090.3	16801.2	15825.6	17807.5	15055.6	15120.8	13219.6	18367.3	20503.6	13176.9	14839.7
M146.11767T1	146.118	1.00374	-	-	[M+H]+ 145.113	138249	140241	136118	161975	125052	164266	131091	208197	150369	215370	132507	129616	146644	146965	159044	143694	129460	161458	130259	143231	134400	161406	141204	106301	139323	159222	152240	139136	152674	152157	142929	234431	164959	143137	145015	162684	121911	166701	147371	112078	108356	145670	164944	138333
M147.02884T1.21_1	147.029	1.21358	-	-	[M+H-HCOOH]+ 192.027	32131.7	37356.3	34905.5	7056.79	27257.3	28209.3	38529.4	28100.7	40524.3	24070.7	25799.1	33831.1	30775.9	33457.6	24292.3	28253.6	36503.9	38127.4	32891.5	29575.1	35194.3	31248.8	26710.5	28179.6	33967.9	28519.6	30851.9	29615	38378.1	42097.3	15394.3	33814.7	33165.8	36364.1	32873.3	29826	31413	26399.9	31888.9	27580.5	21677.5	27634.8	24919.9	31533.1
M147.07635T0.89	147.076	0.892007	-	-		253326	280155	276239	153565	334986	236003	237600	308748	322780	317620	191511	278427	269281	226382	254367	197099	215401	185575	287043	242090	222729	226907	199075	198494	207257	237715	316434	224363	263837	216393	194334	169232	275293	171425	191594	237540	272175	268252	288137	242191	231371	248588	334561	241107
M147.07648T1.22_2	147.076	1.22174	-	-	[M+H+HCOOH]+ 100.057	13559.7	15445	13883	10791	10605.2	13973.2	8198.92	14370	13632.1	14210.1	11197.3	12677.2	11739.3	13628.7	10000.4	14286.8	6614.34	17938.3	10315	12244.5	10599.2	13581.9	16527.1	12432.5	11958.3	14632.9	13640.3	10863.3	19742.2	13373.3	13584.7	14163.2	13943.2	11412.4	11585.3	10027.4	17981	16005.4	10963.9	10930.2	12634	15610.1	19606.2	15036
M147.51598T0.74_1	147.516	0.738891	-	-	[M+Na]+ 124.531	10350.9	9841.85	9697.13	9077.47	7376.13	8568.33	11330.6	9423.65	8396.29	9504.18	8682.96	7044.69	9230.46	9750.15	10633.8	9979.62	9190.28	7523.4	11176.8	8630.6	8201.36	7209.09	8047.99	10231.1	9996.04	9922.18	12733.3	11174.5	11603.2	9522.58	7298.59	7472.13	7632.19	9238.58	7837.25	10133.7	10504	7336.62	7971.01	7222.7	7754.95	7971.68	7076.28	11469.1
M148.06037T0.92	148.06	0.92248	-	-		121014	111009	132051	181678	126680	158511	105293	143287	123870	128441	118777	53281.9	92823.3	107928	115675	119963	98883.2	207860	97072.2	133922	109986	129141	120764	114481	85995	127998	64865.4	123413	114208	134808	108119	173210	165419	111226	160739	115643	85853.3	131615	159702	125760	114987	131382	124845	118290
M148.09683T1.21	148.097	1.20993	-	-	[M+H+HCOOH]+ 101.084	265618	290786	292133	254757	276935	286011	308006	267162	318316	326679	289438	276169	324299	278152	307857	261525	308346	273651	340869	338618	330282	302667	313249	275999	296112	288223	302464	265401	262292	299071	288210	257991	301104	276890	284301	271849	285575	274387	283244	248097	305603	299254	306285	306613
M148.09692T1.04	148.097	1.04315	-	-		52160.7	57882.9	59329	-1293.38	8782.01	73855.9	46554	46462	32487.7	50013.9	53332.8	47241.2	45105.7	52850.8	75677	44045.3	53196.5	39776.6	55173.2	66961.5	56612.8	51762.7	57091.7	55308.1	58007.1	39761.6	63609.1	55825.4	61714.8	51734.6	54271.4	60762.6	68713.8	48346.9	48088.4	65932.5	52450.6	57639.9	44763.3	43901	64284.2	43795.1	37884	42293.9
M149.05968T6.14	149.06	6.1407	-	-	[M+H]+ 148.053	10837.5	9750.49	7786.64	9450.91	10822.2	12886.5	8345.62	8321.79	8058.86	10919.8	8735.69	7127.82	11558.8	10986.7	10147.2	9691.45	7483.23	11877.6	10412.9	10920.2	8047.21	9691.11	9762.96	10341.3	7694.11	8839.15	8930.61	8566.33	8781.61	8545.66	8552.89	8149.38	11234.2	6251.56	8455.75	10811.1	9367.09	8916.23	10515.2	8834.62	8416.04	7553.59	10018.3	6887.29
M149.06363T0.93	149.064	0.925976	-	-		6279.61	6341.19	7212.81	8275.7	7545.27	9884.73	7835.36	8948.47	6777.72	7379.19	6735.97	2244.41	5452.63	5851.34	7598.6	7079.51	4361.84	11862.6	5394.31	7144.09	6771.13	7174.97	6618.13	6033.96	3510.9	7327.79	4123.7	7526.31	5742.95	7768.98	6096.33	11981.8	10404.1	6109.63	9500.11	7090.74	7843.95	8135.68	8389.75	7143.66	7487.76	7546.41	7680.91	7585.21
M149.10019T1.2	149.1	1.20467	-	-		21457	19106	22389.3	18919.7	21726.4	19768.7	24605.3	21845.9	23404.5	23970.6	23772	21415.8	22133.5	20723.7	21081.5	17421.8	22964.7	18962.5	23627.1	24882.5	27255.6	21499.7	21729.4	20950.9	24195.6	19479.7	21993.7	18233.1	17000.6	23323.7	19994.3	21874.4	19605.2	19477.4	20904.6	16680.7	19507.4	16322.6	19576.1	17827.2	22206.5	22414.4	20360.4	19714.2
M150.05823T1.43	150.058	1.42579	-	-	[M+K+HCOOH]+ 65.09 [M+Na+HCOOH]+ 81.0639 [M+K+NH3]+ 94.0686 [M+H+HCOOH]+ 103.046 [M+Na+NH3]+ 110.043 [M+H+NH3]+ 132.025 [M+H]+ 149.051	39701.6	45810.7	48166.6	31321.8	54698.2	57301.5	42095.8	51531	36822.1	57695.3	36495.2	30640.9	29618	40341.7	41819.7	37307.7	33976.6	28096.1	41794.8	36123.6	33008.9	37047.2	29430.2	40919.2	40926.6	44009.9	47528.8	34087	49089.7	31845.4	36863.6	53146.5	50544.8	28625.1	36958.6	41347.1	40481.7	46689.3	58394.7	42296.7	50069.3	51048.7	50642.8	33696.9
M150.0583T1.21	150.058	1.21256	-	-		952207	1.00435e+06	1.20032e+06	728639	1.11886e+06	1.31527e+06	1.15732e+06	1.29214e+06	922342	1.39449e+06	1.0931e+06	939530	839622	1.20731e+06	1.18016e+06	929976	760685	834901	1.0954e+06	936882	886254	897055	786460	1.1887e+06	1.2787e+06	1.1213e+06	1.03976e+06	954483	1.22105e+06	907626	863323	1.34934e+06	1.20516e+06	759633	1.17726e+06	1.05146e+06	855890	880150	1.32929e+06	1.14146e+06	992737	1.15527e+06	1.08716e+06	883195
M151.03521T0.74	151.035	0.735624	-	-		627528	551277	613826	528262	547033	606027	627302	571530	612813	563811	595177	643462	605672	609803	665089	666375	644130	590764	638760	601689	567528	613601	555741	574665	657686	685626	606911	583897	716666	576296	565831	566998	581724	555495	528063	670754	660111	619497	653330	508762	628735	719744	621342	631806
M152.03666T0.74_2	152.037	0.736392	-	-		111468	102215	109900	92638	97709	111673	122244	97120.7	116904	115360	102424	115695	110798	109299	125475	121705	111172	105863	114559	105226	105706	119985	105701	103805	118981	116773	108936	107442	127219	102757	101707	97086.8	105890	94905.6	90864.7	118090	113116	108834	114110	89203.1	109284	124359	114481	119840
M152.05419T1.21	152.054	1.21217	-	-		44619.8	44318.3	44977.5	35723.5	42444.2	56009.5	47789	55340.4	41487.6	59888.4	48219.4	47837.5	35805	54245.1	47119.7	45819	36191.2	35814	48678.7	46630.3	40954.9	41045.4	114764	38723.8	58098.7	48650.1	47462.2	44136.4	51470.5	31490.8	42549.2	51373.2	56795.9	36154.2	53095.6	41207.7	41712.9	38673.4	61425.3	50144.4	45244.8	49328	49982.6	35925.9
M152.0705T8.39	152.07	8.38934	-	-	[M+H-CO]+ 179.058	17064.1	20392.7	21016.9	14819.3	18659	21021	21719.7	22205.9	21047.9	16996.4	20719.2	18648.3	13171.6	19633.2	20150.4	15714.6	23652.2	23130.4	17729.7	17037.7	24334.5	18969.2	16329.4	15152.9	14191.1	19529.1	17100.6	21430.8	16578.7	20674.2	17401.7	20151.5	21981.7	15919.5	20461	22327.8	19106.1	21628.4	19107.3	16596.9	20100.3	18181.6	15247.2	22045.1
M153.03286T0.74_2	153.033	0.735857	-	-		95216.1	84162.2	95217.7	78321.2	85245.5	90947.7	96808	84726.7	88674.9	88400.7	79183.6	89854.9	84489	87814.8	106229	101182	94386.9	92118.3	91643.4	81030.8	83820.3	89729.5	84377.3	86522.3	98962	102367	87282	87671.7	106085	86941.8	84600.4	79364.8	86626	83861.3	77317	97994	98731.8	87543.4	97065.9	76542.2	90828.5	101937	94135.5	90919.6
M153.12737T13.97	153.127	13.9661	-	-	[M+H-C4H8]+ 208.183	4237.71	6218.2	5293.61	5955.99	6579.44	6782.82	9750.81	7470.13	8860.55	7873.98	4739.75	3305.44	6863.25	8141.22	8606.03	10784.6	10042	9198.74	11391.2	6795.97	4510.25	5411.78	7796.63	10777.1	8271.51	6427.12	9121.9	10556.1	9221.2	6889.89	5232.56	5218.82	5335.96	6344.13	6145.54	7646.02	7050.23	9948.21	9955.81	6076.81	2096.28	3311.08	4879	5063.08
M154.03603T0.74	154.036	0.738298	-	-		6703.94	5524.57	6805.56	5756.64	7411.89	6310.11	6938.98	5867.48	6880.2	6104.44	5839.01	6833.24	6350.96	6992.98	6815.74	6495.45	7168.82	7028.06	6833.36	7223.19	7182.48	6822.54	5780.27	7580.53	7258.17	7564.65	7711.44	7461.06	8574.42	6547.91	6944.91	5287.2	5849.06	5755.79	4881.73	8094.59	7622.06	6029.22	6055.92	5053.86	6929.77	7473.13	7143.1	6867.07
M154.08452T1.22	154.085	1.21683	-	-	[M+Na+HCOOH]+ 85.0908	4549.02	7560.96	6879.53	10622.2	6938.09	7024.16	5623.72	6686.03	3581.45	10503.9	20210.6	5741.11	5066.26	7003.4	8452.56	6089.44	8297.28	6354.52	6183.37	9643.96	6979.72	6907.57	7990.46	10175.2	4927.3	9030.97	6901.32	5718.33	5329.52	6115.05	10159.6	6814.27	6627.44	6793.17	7004.69	6433.39	6558.69	8599.43	5478.97	4375.21	8411.79	5209.51	7379.26	7241.34
M155.07912T0.81	155.079	0.808193	-	-	[M+H-CH2]+ 168.087	10846.8	13037.8	12503.4	14273.8	10774.2	16823.9	13590.4	13113	9881.38	15674.5	15004.6	14670.8	9438.48	13377.3	17003.2	12114.6	13200	14278	12309.7	17304.8	12233.6	10677.2	11155.6	18845.8	8491.75	13637.8	14280.5	12309.3	12213.6	11830.7	11107.5	21042.5	18056.1	10257.9	12860.4	12627.6	11726.2	12424.8	16975.2	16158.1	15075.4	13838.8	14777.2	12805.8
M155.50459T0.74_1	155.505	0.736872	-	-	[3M+2H]2+ 102.993 [3M+2H]2+ 102.993	4086.64	3963.64	5795.44	5202.09	3975.87	3671.92	4159.21	4540.34	5068.35	4540.13	3618.31	3867.46	5645.58	5585	3749.67	3242.55	4801.74	2536.86	5468.05	4032.03	4634.83	3837.31	3607.95	4204.93	4169.91	3392.29	4192.55	4175.31	2769.52	3813.42	3001.07	2504.44	3211.03	3549.55	3056.15	2873.94	3748.55	3094.06	2942.39	3261.82	4424.41	2916.04	2139.58	4107.26
M156.07678T0.85	156.077	0.854219	-	-		24047.5	18988	24449.4	17221.2	18703.6	33790.8	24856.5	27154.8	22548.9	23159.6	17070.6	19119.8	18916	12725	17016.1	24037.6	18370.1	24871.6	25637.8	26930.1	17315.9	19044	21036.1	26508.7	13466.2	17475.4	28878.6	22860.1	24045.1	23861.9	21402.1	14916.6	23695.8	19352.4	11752.8	26224.2	22596.8	27576.5	28493.4	19447.2	24104.1	22408.5	20913.5	21531.6
M156.10188T1.2	156.102	1.20141	-	-	[M+H-CH4]+ 171.127	2.46785e+06	2.04506e+06	2.13728e+06	1.06358e+06	2.16619e+06	2.08697e+06	1.84168e+06	1.88211e+06	1.90458e+06	1.98462e+06	1.83391e+06	1.80558e+06	1.34839e+06	1.95159e+06	1.9465e+06	2.11476e+06	2.22129e+06	2.14899e+06	2.19438e+06	1.70367e+06	1.95187e+06	2.43112e+06	1.94272e+06	1.79748e+06	2.2416e+06	1.77148e+06	1.87121e+06	2.21004e+06	2.29423e+06	2.23022e+06	1.7564e+06	2.02228e+06	2.4075e+06	2.2245e+06	2.42915e+06	2.21634e+06	2.40797e+06	2.39559e+06	1.69043e+06	2.32853e+06	2.0327e+06	2.1121e+06	1.76168e+06	2.01774e+06
M157.10524T1.2	157.105	1.20146	-	-		208941	175898	178939	97948.2	177051	180698	156616	150743	168553	169752	159669	154058	113688	160499	173688	166708	181820	178687	177479	142968	169519	216725	179193	156063	194764	157884	170607	206765	214607	198683	161653	178272	227334	198526	228863	199333	223148	208471	154434	209915	189538	188651	155409	177683
M158.11741T1.21	158.117	1.21048	-	-		24069.7	88314.7	32439.6	21640	36202.5	26723.2	34851.2	29784	30055.4	35533.5	26613.3	23344.1	17760.5	21236.7	25337.4	29324.2	22810.4	25113.1	34950.8	40549.1	25012.2	31068.3	34964.2	81724.7	31233.8	35069.1	34202.2	19712.5	13603.4	24439.9	14910.7	37360.9	43036.8	23442.5	33950.3	3407.35	23331.1	13297	16220	39656.2	20760.9	38111.5	23710.3	7500.13
M158.52245T8.4	158.522	8.40202	-	-	[M+K]+ 119.555	1883.96	3245.94	2593.51	2468.51	2011.49	2777.59	2290.97	2869.46	2833.09	2218.25	1885.96	2227.3	2760.42	2357.54	3099.99	2163.28	2355.02	3420.45	2575.41	2694.65	3224.27	2705.59	2737.15	2976.3	2320.61	2607.8	2288.96	2513.25	2336.92	1479.38	2616.08	2403.61	2659.67	2422.8	2288.18	2377.1	3361.67	2437.22	1679.85	2732.13	2215.94	2395.59	2178.78	2407.96
M158.92191T0.88	158.922	0.875274	-	-		8856.05	5906.81	8648.38	6254.29	6861.2	5479.09	5667.18	7928.99	8737.12	7547.93	4810.02	6299.36	5411.25	5643.6	8471.18	7167.91	8930.28	7641.38	8767.76	8690.36	9654	10935	9705.35	7401.7	8280.12	10056.5	9337.73	10150.8	12790.3	6125.28	8079.15	9271.4	9259.58	7761	6934.71	10073.2	12879.9	10400.9	7584.42	6397.98	6195.83	7333.3	6493.95	6247.57
M159.00612T0.7	159.006	0.698029	-	-		165948	149160	157454	197429	160881	188290	179654	162996	151647	179421	163076	181217	160498	180140	163965	7069.32	199420	21077	170538	168311	172401	176281	172339	166043	208350	191428	197782	181648	165874	166462	162428	165961	177661	181979	188792	154100	190332	150542	153008	157649	180192	166845	173177	175447
M159.05126T0.98	159.051	0.984219	-	-		96490.9	111228	99656.6	76534.5	122423	107037	99472.1	121044	89505.4	81618.3	90906.9	108988	90249	60227	47418.8	103370	93154.9	113488	78970.2	110606	80800.4	105392	87189.9	79732.7	54990.7	59641.5	83223	77116	86746	92299.4	89582.6	114536	96262.4	60371.6	71813.3	71068.5	75647.6	77095.7	91011.1	110437	95507.6	94935.8	84873.5	97279.6
M159.07633T0.93	159.076	0.92894	-	-		19774.8	20504.8	20426.1	16861.3	15270	24471.7	18888.6	19988.8	23452.5	16423	13259.4	16440.1	15819.1	18107.1	18900.8	24759.3	17961.9	27755.6	18523	20648.9	19129.2	23051.6	17768.6	20159.1	20579.1	19855.1	19387.5	18966.9	23462.7	18201.9	18802	18979.1	19758.5	17060.8	16351.4	22645.6	19507.1	23520.9	20742.1	21553.8	18065.1	27821	21505.7	21144
M159.07644T1.09	159.076	1.0936	-	-	[M+H-CO]+ 186.064	13682.4	6264.79	6826.89	7260.19	8269.81	10176.6	6621.58	6046.15	6786.82	7534.85	5803.29	6834.35	9326.08	7805.72	8284.82	23535.2	7265.55	8351.02	6395.59	7065.03	7260.32	6219.1	7421.37	7035.99	9138.58	5421.16	8582.62	6840.51	7448.78	7975.57	12218.4	7304.91	7555.67	6294.53	8325.95	7690.48	8676.92	9116.33	7714.51	8071.36	7510.43	9588.83	7361.9	9435.85
M159.09168T7.57	159.092	7.56713	-	-	[M+H-HCOOH]+ 204.09	14286.1	11538.8	10909.4	7719.88	13135.9	12289.6	13881.6	11867.2	11084.9	14885.4	10472.3	10447.6	12191.9	13278.3	10420.8	8124.9	11223.2	8974.36	11493	9711.98	8874.28	10826.4	9250.91	11418.8	9961.97	7821.92	13734.2	10765	12216.5	9183.36	8928.1	9904.09	12187.2	12189.9	8416.07	11818.6	12767.6	13958.1	11316.6	10485.7	13610.9	13502.6	12103.4	10674.4
M160.06086T1.03	160.061	1.03152	-	-		186428	175921	185918	169979	181150	180203	189438	173216	183545	177057	162052	168471	175780	166646	172380	167196	159889	168062	172949	174172	178885	183809	165819	162615	178658	185842	188323	179103	172852	182444	181227	183201	185697	176597	182114	175017	187999	207107	176798	164749	156949	171816	188408	163826
M160.09668T7.53	160.097	7.53167	-	-		32834.2	19371	25498.6	33191.9	19844.2	19530.2	28939.9	25267.3	16758.1	10904.8	11453.2	47313.2	23844.7	23133.4	26716.8	27014.8	25779.7	35006.4	24388.8	26723.8	30729.4	33978.4	30297.1	20253.4	7677.03	27896.9	18866.2	20522.8	37358.8	29129.2	45317.3	30518.1	24665	30850	52015.4	18977	20156.8	27605.8	14850.5	23778	24820	28701.7	25228.3	37654
M160.13319T1.2	160.133	1.19968	-	-		180807	227885	184788	175413	203294	161321	229604	233470	250382	204001	225304	149678	166824	226475	205991	163604	214010	210060	230579	220048	219623	183719	152914	216639	205614	164715	263379	179117	165840	220164	167409	314662	265517	193505	270842	139545	221024	200286	193638	233092	160510	259276	216548	172450
M161.0642T1.03	161.064	1.03426	-	-		12773.1	12694.7	11355.6	9273.9	10901.8	12135.8	12603.2	10238.2	12914.6	11581.6	10442.7	10093.8	13052	11346.5	10873.2	12659.9	10959.9	10238.4	10756	11320.6	11217.4	12535.8	11370.5	13160.9	13784.9	13056.1	13357.4	11230.6	12758.8	13405.5	12731.9	12309.3	13121.6	12976.8	14141.1	11917.8	12978.4	12589.6	12752.7	12292	10463.4	10292.8	12846.8	13170.6
M161.12847T0.85	161.128	0.846705	-	-	[M+H-C2H4]+ 188.152	11968.8	12577.7	13248.1	23147.8	15286.9	9535.1	10479.1	12082.8	12698.9	17630	11325.5	14588.4	11410.1	11209.3	13981.2	12580.6	13406.9	10865.1	11297.2	10901.3	12603.9	13251.2	10346.8	12451.3	-12119.1	11529.4	2945.85	10439.8	12005.1	13299.6	12132.3	12129.1	10717.5	11260.8	17508.9	9773.18	14470.2	11520.2	11575.9	10902.4	12119.1	9712.58	15733.4	9145.05
M161.54594T9.19	161.546	9.19004	-	-	[M+2K]2+ 245.164	2378.03	4341.08	3649.48	1756.45	3119.08	2864.99	4294.16	3098.72	3397.89	3535.1	3187.38	4007.37	3101.07	4825.63	4087.4	1687.92	4013.85	4484.78	4123.4	3050.36	3382.32	3054.9	3571.84	307.078	1292.59	3452.98	2643.89	4227.09	3037.42	3957.18	3808.54	3632.63	3741.53	2454.35	5586.2	4058.37	4095.04	3683.65	3618.24	3274.35	3700.42	3256.77	2675.71	3839.22
M162.00767T0.74	162.008	0.73815	-	-		33764.7	34191	38691.8	31138.4	36655.8	35382.7	36130.2	32886.6	35994	41247.1	35719.4	35300.4	33433.9	34078.6	32091.2	38314.9	34928.5	29355.2	33639.1	29839.2	30859.6	33251.1	33359	27799.7	31300.8	31173.5	41872.4	33621.4	37322.8	36877.6	35272.4	34356	39862.4	36445.5	35032.1	39479.5	34571.7	33459.8	37349.1	33741.5	38324	36103.1	35079.9	36699.8
M162.05491T8.39	162.055	8.38944	-	-	[M+H-H20]+ 179.058	28899.5	46248.6	40381.2	28998.9	34840.2	34548.8	32976.9	41549.2	35552.9	32320.7	29565	34537.8	22941.2	31155.6	29571.5	27930.2	38536	35813.5	30127.9	31639.2	31268.7	31154.4	32373.5	22291.1	24489.3	37479.6	36885.5	37713.7	37300.3	47529.2	36748.5	38435.6	39549.3	33125.8	39780.2	34633.3	37741.4	41312.1	33541.3	38650.6	37958.3	33371.5	27985.6	32537.5
M162.07607T1.02	162.076	1.01791	-	-		13497.1	10215.8	11118.5	16962.6	35046.5	15169.5	16268.6	14916.4	7600.75	13695.2	11844.1	17112.5	9483.31	16354	11854.2	23593.6	15916.1	13699.2	15457	17312	12567.8	17598	30497.4	14051.3	15783.1	11457.4	15595.5	14604.6	13233	13682.9	11330.8	20780.6	17347.8	11046.3	14815.1	11973.3	17561.2	12189.7	9329.26	7088.46	13569.1	9892.35	18145	11642.7
M162.11242T0.93	162.112	0.925292	-	-		473070	448367	451773	706618	434597	365724	607743	839260	618332	406478	642132	477944	839553	714392	810844	357478	696540	629356	600818	697501	472198	432275	316773	365008	651402	312243	464714	378561	422013	424541	545833	498365	493732	251375	471657	426381	353837	581097	555136	614633	313651	566392	869159	552044
M162.11247T1.21	162.112	1.21358	-	-	[M+K]+ 123.152	11068.5	11880.8	11255.7	11712.8	8543.77	12987	11540.4	9609.55	8449.32	10912.8	10412.3	9230.83	11838.6	9243.23	14091.6	10137	11339.7	10738.7	10478.1	11337.3	11757.2	11090.9	12334.8	10561.9	12105.7	8479.44	12544.4	15333.7	14775.1	10307.3	13068.8	13299.9	16389.7	10632.8	11928.4	12642.1	8298.77	11993	10329.4	8426.75	12451.1	9795.32	11159.9	10741
M162.54613T9.19_1	162.546	9.1912	-	-		2628.96	2591.88	3513.96	1233.94	2239.29	3387.91	3029.95	2452.84	2908.6	4346.29	2334.94	3190.35	2543.19	3575.68	2972.8	1869.68	2863.62	4588.94	2602.96	4012.09	2907.01	1293.25	2854	1070.27	1215.77	3420.19	2352.23	2987.34	3585.18	4563.31	3767.15	3724.79	3079.2	2382.74	3605.56	2473.45	2825.65	2980.83	2869.53	2976.58	3294.99	2524.97	2538.61	2475.69
M162.5651T9.19_2	162.565	9.18933	-	-		2431.24	2866	3125.5	1327.72	2357.51	2448.03	2549.64	2807.94	2603.31	2999.72	1959.53	2215.79	1112.74	2921.09	2679.79	2120.49	2070.99	2867.83	1608.17	3060.27	1983.8	1690.18	1656.08	188.808	1088.49	2604.46	1625.92	2070.14	1637.4	2534.99	2490.3	2680.51	2453.84	1322.14	2984.96	3096.39	2783.14	2451.36	1744.23	2132.71	2848.86	2489.01	1682.91	3759.29
M164.92993T0.86	164.93	0.859547	-	-		35607.1	41498.1	49029.4	24858.6	38113.7	28527.8	33657.4	43714.1	32074.5	38638.5	35688.2	27005.2	24682.5	33371.6	42217.1	32466.8	47792.7	47678.3	36589.2	38577.7	36296.4	45167.2	42078.4	41229.7	37456.7	39071.8	38627.8	40882.6	52908.2	33632	33928.7	38517.8	42351.5	34695.2	40856.4	38256.3	43021.9	40549.8	38146	33906	34429.6	35206.8	37708.3	32580.2
M165.05087T0.73	165.051	0.734036	-	-		6661.41	5924.11	6046.68	5215.26	4950.06	6632	4816.43	5065.99	5773.87	7706.35	5400.83	6093.04	4953.17	4733.34	6559.6	7182.9	5705.55	4872.55	6236.05	5414.74	6084.42	7408.25	5764.59	5931.42	7383.27	7908.93	5804.05	7354.9	7926.86	6120.1	5539.48	5322.26	7262.17	5056.95	5569.22	7250.55	6067.13	8258.51	6056.79	4874.65	5404.62	5153.1	4919.03	6218.24
M165.05465T1.22	165.055	1.21578	-	-	[M+Na]+ 142.063	128816	146697	145439	108828	150544	192043	147278	124572	123204	174245	145908	125862	80367.2	153258	184357	143780	102468	124580	140242	133468	104383	140784	117141	144974	144784	135237	145043	132901	163816	97907.4	139552	129566	171395	115421	167550	192157	125794	147979	168069	146776	155780	159767	122077	125752
M165.0546T2.6	165.055	2.59547	-	-	[M+K]+ 126.091 [M+Na]+ 142.065 [M+H]+ 164.047	12315.7	14543.4	13505.3	12418.9	15650.4	17942.7	12602	12450.2	10960.3	15656.3	12680.5	10700.6	8082.35	13329.9	14930.2	12818.5	8855.39	10097.3	15908.5	13322.9	11026.4	13263.3	9450.42	13624.7	10687.6	12412.7	14726.6	10561.9	12789.9	11051.6	10464	12072	14073.5	10413.6	12358.3	15503.5	11847.5	13868.2	14223.1	11354.4	15328.7	14849.9	11543.6	9532.23
M166.02604T1.06	166.026	1.05981	-	-	[M+K]+ 127.063	6921.55	9575.87	7846.97	7813.89	9537.78	8795.51	7896.43	7505.41	7849.41	7875.31	9507.7	7908.19	8170.8	8263.29	9698.48	10535	9629.02	7696.94	8670.21	7447.78	8477.85	7068.13	8156.01	7139.93	8052.32	7962.04	9057.11	6825.41	7603.95	7683.36	7245.58	7605.66	7367.41	11270	7378.23	7579.83	6825.55	7288.25	7893.42	6510.62	7666.48	8502.96	8376.2	8973.6
M166.08618T6.14	166.086	6.14015	-	-	[M+H+NH3]+ 148.053	1.20811e+06	1.10307e+06	1.07593e+06	1.03769e+06	1.1241e+06	1.19608e+06	1.02295e+06	841292	900349	1.0287e+06	844875	788215	938093	975620	1.01556e+06	976158	744555	954169	1.01253e+06	1.11119e+06	812762	1.05509e+06	949037	1.09846e+06	900083	922772	1.03613e+06	980364	955420	877432	923878	856358	1.07876e+06	767376	1.04139e+06	1.12035e+06	955436	1.0114e+06	1.03583e+06	942477	1.06509e+06	976634	1.14829e+06	901585
M166.08619T2.77	166.086	2.76773	-	-	[M+K+HCOOH]+ 81.1176 [M+Na+HCOOH]+ 97.0916 [M+H+HCOOH]+ 119.074	328523	380436	351481	251721	311275	333423	239408	236105	258204	228275	307015	316543	188364	260859	284872	297004	172922	268133	330389	227256	142742	376515	281827	401977	268808	261034	294044	338014	225068	203034	277334	133047	406739	163436	404430	435399	278390	395681	326871	288901	373967	295040	302335	200675
M166.0862T2.43	166.086	2.43358	-	-		372550	386093	397451	327534	338079	386517	309129	272923	279779	252856	362303	332702	249909	379048	409026	348825	252570	267074	369877	264077	266135	373118	296712	421207	332183	369799	372450	376136	344243	260634	369451	250695	398281	229473	478121	430190	354010	364832	322740	291370	414492	323585	323196	316176
M167.01273T0.74	167.013	0.735624	-	-		652518	690272	691523	636040	657310	661916	672463	581236	658080	623137	621505	638800	656372	656003	641495	642990	666135	630709	640137	646959	687117	651828	681121	648622	633665	658323	672936	593067	617708	641434	619087	551583	646377	669497	647070	638141	635039	606804	622180	540114	666104	648896	601159	622704
M167.08952T6.14	167.09	6.13876	-	-		114276	108809	103709	97320.7	103021	109314	99513.9	81974.8	90071.6	94223.3	82202.2	75788.2	90702.2	95377	99004.4	90528.5	77442.1	104554	101482	107716	76344.9	103446	90413.7	111747	99899.5	90514.3	101914	102545	102904	93080.5	100349	85035.5	104510	86091.5	109770	111971	92694.9	102831	101356	89128.3	103818	91544.2	103217	86192.2
M167.08953T2.79	167.09	2.78674	-	-		27916.6	35664.3	32392.3	22413.7	28223.6	30801.4	22979.2	21014.8	28150.8	21646.3	28784.3	31488	17864.1	23836.2	22350.7	28680.1	19028.2	24194.8	30306.5	19426.7	16518.5	37195	25549.5	34159.3	19289.8	29561.5	28500.9	31048.2	17596.3	21132.9	27976.2	21119.6	38336.6	16396.9	30538.4	34695	28942.4	38047.4	32579.8	29589.4	29392.4	23269.1	26797.3	25861.7
M167.08956T2.38	167.09	2.38455	-	-		23472.1	15697.6	27054.7	37388.1	23670.5	34901.5	36557.1	22375.2	28125.8	23213.6	41946.4	25489.9	30625.4	38690.7	45238.1	37494.4	30333.5	25919.7	44583.2	30175.6	29890.4	35185.4	28530.4	42849.1	34142.4	33755.6	40098.6	35600.2	33461.3	23703.8	34454.3	26679.4	29593.8	21551.8	50405.1	38141.9	36679.2	24325.4	22715.7	32164	42214.1	35715.4	23975.3	40635.1
M168.01587T0.74_2	168.016	0.735675	-	-		35245.7	35092.4	38436.5	36458.6	35315.7	39686.1	37088.9	33710.7	35524.3	33612.9	39088.3	37093.7	39019.2	41110.2	40757.2	40105.6	42542.7	39370.5	42062.8	41633	38766.1	40250.5	37318.3	40955.5	41514.3	36366.5	36265.9	38894.3	36848.9	37321.7	36626.6	33128.6	37122.4	38359.7	36552.7	37677.1	36651.3	32740.6	37928.6	35761.4	32919.9	39573.7	33980.8	39298.4
M168.10184T9.18	168.102	9.18208	-	-	[M+H-H20]+ 185.106	7705.14	11778.8	12708.4	6528.75	7662.86	7845.07	9929.65	9496.69	7112.81	9289.8	6988.55	8981.27	4519.69	13963.7	10392.4	5708.82	7943.73	12945.6	10652.7	9099.14	13074.2	6415.87	7264.58	301.492	7005.14	10194.4	7495.59	8703.24	7739.69	9076.15	9906.78	11463.7	10257.6	5885.15	10212.5	11369.2	9405.15	7949.88	8966.73	6884.48	8265.97	9839.3	5830.13	11202.8
M169.03561T1.21	169.036	1.21123	-	-	[M+3H]3+ 504.091	29678.2	72721.7	61583.2	43533.1	43839.7	40211.9	51471.2	76274.3	50932.5	61476.8	51536.6	59435.9	36356.5	66218.8	70823.7	44660.5	51760.7	71406.2	78706.6	54360.4	78784.3	43726.4	72549	54475.3	77401.4	64699.4	42558.3	57655.5	47226.6	64491.6	81124.9	74275	42559	61020	66280.5	35923	53639.6	59494.8	25823.3	42860.7	71007.9	68935.5	56071.4	46977.5
M169.04585T0.74_3	169.046	0.735796	-	-	[M+Na+NH3]+ 129.034	35304.5	34193.6	37898.4	31383.6	32488.2	35072.6	37316.1	35903.1	37082.6	37046	38655.7	38341.8	32853.8	36872.3	40184.1	36793.4	36916.5	34089.6	38312.9	31309.9	31007.9	36260.1	29429.1	30991.8	34875.7	38112.3	39298.1	35410.3	41774.2	37165.7	32301	32673.2	34630	33385	32454.9	38227.2	39243.1	35634.4	37452.7	31514.5	36146.5	42146	34972.5	37419.5
M170.06618T0.74_3	170.066	0.736392	-	-	[M+K]+ 131.105	16814.6	20071.3	15359.5	13695.5	17412.6	17380.3	19747.3	15703.3	19731.8	17187	18193.4	18137.8	14673.3	17005.1	18284.3	16569.5	15043.6	15543	16740.9	15061.6	16840.9	19382.8	16433.8	15378.1	17883.9	17500.7	16401.3	16242.6	4285.54	16097	17173.5	15845.6	17568.2	13887.7	14421.9	17796.4	18944	16731.7	19570.8	13828.6	15416.7	17920.2	17242.5	19395.5
M170.09246T0.87	170.092	0.873883	-	-		22739.6	15773	13247.8	9963.22	13951.8	20567.4	15030.4	13664.8	15699.1	13744.7	11690.2	11978.4	12938.9	10051.1	13120.6	16372.5	13139.7	16077.5	14257.3	12780.3	11964.9	17210.2	15690.2	9698.55	15877.6	15769.8	14948.5	12157.8	14981.1	13043.5	18358.8	13499.8	19888.7	12066.1	11019.6	18301.8	12283.1	14793.9	12649.1	11975.3	14454.1	14717	13441.1	19882.9
M171.07644T1.06	171.076	1.06357	-	-		19573.9	16892.2	12095.5	9226.07	9623.53	16695.1	15368	14965.4	23056.9	14149.1	10753.2	18748	11840.1	10798.4	10124.3	17938.5	14753.8	13397	10027.7	12994.9	13269.2	24106.6	11932.9	6734.3	16499	14748	14109.4	12384.1	13699	19634.3	19535.3	20581.9	22632.3	11535.5	15418.9	13837.8	14892.1	24992.7	18302.6	10123.1	9579.05	15072.8	12281.1	22861.7
M171.55149T9.19	171.551	9.18982	-	-		2767.52	2318.21	2884.4	1125.94	3195.04	2369.04	3149.26	3371.91	2534.19	3302.9	3186.78	2345.18	3132.86	2678.36	3139.18	1476.42	2186.51	3408.54	2383.26	2990.06	2035.62	1886.94	1546.73	511.479	928.235	2771.76	3453.27	2636.76	2301.44	2591.63	2147.83	2746.51	3308.34	890.52	3001.32	2274.2	2771.03	2356.84	2127.87	3747.77	2720.03	2501.12	1878.72	2879.09
M172.0968T1.21_2	172.097	1.21212	-	-	[M+H-C3H2O3]+ 257.098	20918.8	27833	27015.9	22458.1	25126.1	18325.4	21456.2	24272.2	16604.4	18058.6	31624.8	20592.2	18926	31238.8	23748.7	23115.5	32495.9	26599.6	28225.2	24946.9	24155.2	28628.4	21162.6	25281	20865.2	22481.3	25509.5	24033.7	21773.5	26554.7	21047.5	26432.3	24999.4	20132.5	22394.2	25863	37716.2	27624.9	17668.8	37255.7	28142.6	28854.8	28962.5	25820
M172.13317T9.12	172.133	9.12182	-	-		6933.07	6091.77	12658	4223.3	10318.4	11214.4	13764.6	15327.5	14177.4	5426.97	22615.9	13482.9	8312.64	4806.95	11238.1	14248.8	13039	12751.8	7535.97	6054.07	10899.1	3944.45	11335.6	4528.9	21898.1	11395.4	16472	21945.6	20459.6	14476.2	9574.6	5968.86	12338.4	5366.4	6122.06	12354.9	21809.1	19277.1	15366.2	9788.63	11069	10578	19759.7	18974.1
M172.16955T13.24	172.17	13.2409	-	-		76575.6	59022	60162.1	75501.6	75549.8	67541.7	74427.2	65968.8	61521	72881.5	95674.5	79671.3	69458.5	79856.6	84652.6	85619.2	70990.2	76136.3	81760.7	84421	81262.2	69744.9	79709.7	87144	70155.4	81490.5	87752.2	88273.9	99026.7	81125.2	76578.9	101219	85294.7	97766	102531	87994	103128	89595.5	96819.6	85493.5	69461.6	71895.9	89849.4	83667.5
M173.17286T13.24	173.173	13.2406	-	-		7985.46	6861.78	6837.06	7590.09	8965.97	8209.02	8954.41	8062.29	6560.85	8670.02	10988.3	10202.4	7689.69	9584.01	9451.51	8279.98	7708.54	8850.36	9280.95	10723.7	10811.2	7784.84	8766.42	10687.2	8376.56	9155.03	8641.21	9086.73	9491.17	8564.73	9240.4	11468.4	9284.15	11839.9	10696.5	9795.12	10969.7	10353.2	11282.9	10535.9	7579.95	8290.48	9283.08	8748.27
M175.02371T1.21	175.024	1.20878	-	-	[M+H-H20]+ 192.027	52629.9	79963.3	65537	15350.5	19407	59477.5	72011.3	49976.6	110249	45949.2	60753.4	66613.1	80752.7	82563	64901.9	72967.3	85141.9	76143.6	83769.2	68275.9	93669.3	76253	66501.8	51288.4	66461.6	59410.4	63302.2	57703.2	70396.6	75770.5	-1288.1	68228.7	44371.4	65987.8	54726.9	54501.7	76311.5	65322.3	42307.2	51808	52361.3	68360.9	56043.9	77352.4
M175.10771T1.09	175.108	1.0923	-	-	[M+H+HCOOH]+ 128.096	182447	248324	156876	117417	160988	312421	190744	154353	162397	166667	131152	124052	86647.4	162170	139676	164020	253110	113181	171450	193776	258581	196725	152877	186170	176185	215978	173190	166031	168947	154922	204115	168943	254965	93440.2	110390	185121	198210	285283	158034	137617	167870	198272	149105	233404
M175.11895T0.87	175.119	0.866588	-	-		91119.1	97215.7	125520	87447.2	129987	107605	115414	115213	101274	111574	101413	87430.7	68022.3	98755.4	105005	75419.5	95107.8	79719.7	104089	102499	83805.2	92797.2	96517.2	121633	84823.8	77097.6	86566.1	97428.9	106263	75082.5	97229	67015.6	114637	66586	86787.3	88766.3	91420	94946.5	117351	105932	109944	86331.1	93142.9	100108
M175.94134T0.83	175.941	0.834272	-	-	[M+Na+NaCOOH]+ 84.9642	3347.11	2665.37	3547.43	2839.88	3110.19	3810.75	3234.89	4109.79	3904.13	3528.28	3596.67	3611.58	4001.02	3335.29	4364.75	4758.77	3227.89	3999.83	4008.16	4229.01	5161.75	4102.21	3071.87	3558.87	4393.2	3266.38	3663.2	3945.11	3312.85	3736.18	4297.98	3820.74	3460.66	3298.34	4530.97	4514.97	3357.96	3525.26	3128.07	3874.24	2865.74	2594.58	2510.35	3270.68
M176.10292T0.93	176.103	0.929723	-	-		87047.1	90939.8	88525.9	69494.6	68797.6	104299	75540.5	74924.3	91242.6	77011.1	59573.6	74024.9	66436	71978.8	86991.2	111915	75670.9	105518	75537.1	86117.8	77748.9	104548	71474.6	81743.4	88254.7	72738.6	83041.4	76241.3	100199	72241.9	78104.8	77519.7	87972	70287.9	58704.7	95846	82172.4	92842.2	91431.4	82737	70029.8	102367	83292.5	80800.8
M176.93632T0.84	176.936	0.835612	-	-	[2M+2Na+2K-H]3+ 203.961 [M+H-C2H4]+ 203.961	9587.59	10107.3	9062.71	11131.5	9126.32	10238.8	9725.3	9617.74	9630.77	10745	11227.2	11035.6	10028.1	12192.6	11681.3	12506.1	10156.4	8947.91	10380.5	10589.6	10565.1	12441.1	13414.3	11839.1	12840.1	12832.9	12368.5	12761.3	10437.9	10906.2	11928.7	13014.3	10155.4	9434.39	11185.1	11265.1	11920.7	11651.2	9398.4	13256.6	10024.1	10280.4	10404.8	10416.6
M177.10214T5.88	177.102	5.88307	-	-		1039.23	1033.29	2978.91	3762.62	2655.23	3626.02	3059.01	2791.75	-503.933	3684.42	-36.7273	3414.2	1835.64	2432.44	2106.86	9744.41	3645.82	3518.13	-209.95	2489.85	6219.08	3689.54	2173.18	2326.61	4120.94	3078.8	3713.13	2812.54	3741.5	5016.01	2879.35	15203.5	3001.6	4735.8	3915.06	1825.75	3689.37	2010.85	9143.08	-1377.96	2739.29	3980.63	4279.48	2741.35
M177.10608T0.93	177.106	0.929494	-	-		6805.87	7374.92	7458.01	5905.41	5363.23	11990.5	6666.95	7519.18	9059.19	8680.9	5260.79	5597.95	5868.42	6789.58	9980.46	9432.27	6072.9	10220.8	7549.89	7049.37	7340.68	9348.79	6623.32	7619.05	7745.59	6199.87	5096.91	7274.81	7993.31	5739.22	5517.15	6568.21	5860.86	5331.49	4742.71	6908.63	5721.22	8534.52	8202.69	5592.87	6546.77	7573.42	6201.23	5984.68
M178.05319T1.08	178.053	1.0778	-	-	[M+H]+ 177.047	6707.47	5056.92	5447.45	2891.69	6226.61	5034.74	5870.67	6431.18	7900.21	8112.55	6079.94	5387.21	4791.71	6425.78	8656.46	4035.73	4088.71	4346.43	5996.89	3607.48	5647.85	5827.95	4361.35	6557.65	7012.93	4506.94	6954.96	10887	4585.82	8163.94	5149.53	-340.52	4705.5	6951.5	7144.94	8512.65	6332.67	7048.47	9333.8	3955.5	4625.33	5671.99	5356.7	4134.04
M178.05874T0.85	178.059	0.849462	-	-	[M+K]+ 139.102	6438.93	6894.1	6409.33	5459.26	7111.69	8917	6030.95	7383.38	4797.24	6152.39	7253.03	5671.07	6036.28	7592.08	6293.29	6902.61	6219.98	8234.61	6925.58	7076.73	6733.39	6203.42	4695.21	9366.58	4338.52	4879.19	8082.2	6945.68	6409.91	7839.57	5905.01	5148.6	8026.47	5147.67	5717.81	7208.71	4304.88	8107.1	8813.08	6870.85	8568.73	8197.98	7686.97	6029.53
M178.08634T9.99	178.086	9.99035	-	-		9268.86	5970.49	7434.03	4801.91	9474.04	5006.47	9184.81	3680.87	5559.72	8710.74	4887.7	5299.28	6855.72	2270.54	4995.3	4109.41	3745.62	6816.59	8062.43	5653.82	5415.92	4602.28	5157.33	6474.95	6975.63	3224.54	9014.99	13464.5	9766.75	7711.17	10169.5	2231.23	3765	13608.6	6591.19	5275.11	5048.49	5885.18	6133.31	4761.66	8040.23	5028.31	6596.04	11678.2
M180.06547T8.39	180.065	8.38755	-	-	[M+H]+ 179.058	2.54945e+06	3.74706e+06	3.56094e+06	2.38314e+06	2.97385e+06	3.24179e+06	3.08942e+06	3.3637e+06	3.50614e+06	2.62088e+06	2.76993e+06	2.8306e+06	2.00729e+06	2.92781e+06	2.66525e+06	2.34052e+06	3.29293e+06	3.32949e+06	2.71107e+06	2.48505e+06	2.75642e+06	2.74396e+06	2.78205e+06	1.8683e+06	2.01364e+06	3.01699e+06	2.70863e+06	3.09003e+06	2.60113e+06	3.16625e+06	2.66772e+06	3.07668e+06	3.20992e+06	2.41239e+06	3.25472e+06	3.23666e+06	3.0946e+06	3.34496e+06	2.97245e+06	2.89982e+06	3.33521e+06	2.92422e+06	2.52033e+06	2.92888e+06
M180.06844T1.19	180.068	1.19202	-	-	[M+H-CH3]+ 194.078	3835.92	6331.57	7308.51	3080.79	4771.55	6493.36	5715.96	3683.46	4244.01	4842.98	3038.49	2291.84	3816.76	4082.57	6127.22	4057.43	3187.48	4380.97	5104.8	4077.28	4749.52	4342.87	4096.95	3217.89	5015.4	4306.01	6430.63	4709.91	4270.5	4322.61	5043.74	3817.17	5755.95	4268.89	3151.78	3871.06	4960.69	3701.24	5385.08	3966.03	4106.4	4396.48	4825.05	4484.32
M181.06881T8.39	181.069	8.38737	-	-		250540	359882	339489	230167	268319	310285	293564	315274	325543	260222	268610	275114	196593	294642	260572	235963	318504	326796	258758	238990	271265	268283	273650	170904	192947	287388	282512	300527	261685	319264	260085	319000	328792	248783	318838	334117	310306	335471	303246	300823	339433	291727	261819	304353
M182.07071T8.39	182.071	8.38918	-	-		26535.8	39686.8	35129.6	22522.6	28806.8	31934.6	31841.1	30361.8	35698.3	24589.8	30114.9	26565.3	21802.1	30671.9	29411.6	22909	35454.2	37866.5	31250.3	24371.3	26318.5	26714.2	26823.9	17651	20794	32303.1	28871.6	34060.6	27037.4	33821.1	27307.4	34804.3	34881	25282.4	28970.4	32613.8	34355.2	32950.2	27532.6	29102.4	30658.5	27208.3	26558	29590.2
M182.08111T2.59	182.081	2.59302	-	-	[M+K+NH3]+ 126.091 [M+Na+NH3]+ 142.065 [M+H+NH3]+ 164.047	96533.5	126391	116306	91242.7	130094	154836	113187	96175.9	96586.9	134158	109048	94606.9	81969.1	128338	150098	118718	91168.6	105329	136778	123159	88859.1	110862	96433.1	108293	101255	108425	130243	91099	122066	86253.1	99127.1	114032	129196	90489.9	108882	146126	101953	108574	141327	109303	129441	131243	114488	84158.2
M182.08112T1.21	182.081	1.21497	-	-	[M+Na+NH3]+ 142.063	1.2034e+06	1.2775e+06	1.42352e+06	998982	1.24432e+06	1.71697e+06	1.36991e+06	1.20241e+06	1.15628e+06	1.60008e+06	1.38177e+06	1.28143e+06	892860	1.5442e+06	1.86826e+06	1.41137e+06	950708	1.29227e+06	1.34444e+06	1.42218e+06	1.01641e+06	1.27395e+06	1.0549e+06	1.32952e+06	1.37785e+06	1.20777e+06	1.27697e+06	1.25264e+06	1.44612e+06	1.03813e+06	1.27631e+06	1.35249e+06	1.56683e+06	1.08961e+06	1.57177e+06	1.88047e+06	1.26604e+06	1.45399e+06	1.76417e+06	1.51615e+06	1.5045e+06	1.43187e+06	1.21533e+06	1.09039e+06
M182.08115T8.66	182.081	8.65631	-	-		45894.5	128398	169792	76569.1	92240.7	76987.8	90742.4	84596.9	92078.1	77363.3	82213.8	76741.5	2297.47	125666	93483	55152.4	76883	77417.3	107277	70671.8	126341	52406.9	8418.09	-19995.2	76574.3	86272.8	76642.9	81910.4	31792.1	80698.6	43207.6	113580	73515.5	53625.9	76312	187408	76639.5	66086.7	116226	105312	89123.7	57424	57034.9	69285.8
M183.08449T1.21	183.084	1.21444	-	-		116461	127585	149547	101075	110208	165281	143474	128131	119349	169816	141332	131748	85553.3	146859	177863	134529	90151	126493	125288	146042	109714	138897	116405	132827	142849	115145	128141	125594	153082	107182	136041	141415	154839	106730	156139	194332	129580	149037	176250	152713	154176	143043	121070	108072
M183.0845T2.6	183.085	2.59919	-	-		10014.2	17276.4	12479	10557.5	13020.9	17132.9	12252	11442.2	10691.7	13673.6	11496.1	11186	7159.4	14438.6	17782	11623.1	7691.46	11233.1	12482.4	12186.2	10638.3	13900.2	11130.6	11887.8	11194	11320.5	12430	11197.6	13999.6	10732.5	10751.3	13579.3	15030.5	8963.43	14046.4	15220.7	12155.7	11713.5	16455.5	11789.5	13514	13159.1	11998.8	10002.2
M184.09675T9.05	184.097	9.05473	-	-	[M+H]+ 183.09	187672	364409	415496	194216	336569	219421	265185	253731	189993	245483	326911	223844	76185.4	329951	281552	184097	224605	378832	299557	226487	287219	180061	87238.4	-15023.9	191290	256074	204429	244382	107794	249223	145272	306435	235566	180870	261515	418706	234539	205187	301228	264197	257676	226492	194967	220984
M185.02334T0.74	185.023	0.735675	-	-	[M+K+NH3]+ 129.034	48229.7	46909.7	49207	41337	49064.2	49478.9	49432.8	43842	49513.8	49385.9	48524	47819.9	50130.6	49647.7	47776.3	47225.2	51292	52269.3	54755.4	50880.3	46756.2	47792.9	53172.3	48706.5	48535	52089.6	60164.4	58632.3	54371.6	49343	52524.2	45682.8	48546.8	49156.5	51483.3	50127.4	49686.8	49556.9	50995.1	42577.9	46883	49987.4	45818.5	47193.1
M186.11245T1.21	186.112	1.2121	-	-		12345.6	17633.9	16458.8	17383.8	17246.9	19541.5	17107.6	17432	11291.4	16298.3	20627.1	13035.6	12467.8	19022.3	9194.18	11072.9	14966	19840.9	16599.1	21501.8	17629.1	11709.5	11113.5	23349.9	13011.4	14262.9	15615.6	12897.8	17623.8	17723.1	17390	17923.6	25679.2	15391.2	17674.1	18545.4	20493.3	15766	18652.2	19245.3	16379	21358.9	17744.2	19052.3
M186.1124T9.18	186.112	9.17618	-	-	[M+H]+ 185.106	2.20707e+06	3.53702e+06	3.60892e+06	1.60963e+06	2.51268e+06	2.27539e+06	2.84426e+06	2.63323e+06	1.67818e+06	2.54527e+06	1.74952e+06	2.32802e+06	985545	3.30075e+06	2.70153e+06	1.4891e+06	2.31632e+06	3.87276e+06	2.51868e+06	2.41363e+06	2.90115e+06	1.47824e+06	1.42706e+06	-423881	1.54378e+06	2.76046e+06	1.90298e+06	2.57627e+06	1.77195e+06	2.77672e+06	2.90255e+06	3.39438e+06	2.40988e+06	1.56641e+06	3.04e+06	3.22814e+06	2.54698e+06	2.55046e+06	2.41969e+06	2.47898e+06	2.83622e+06	2.76776e+06	1.86608e+06	2.64522e+06
M187.07129T1.09	187.071	1.09409	-	-	[M+H]+ 186.064	12109.9	11295.9	12278.8	13217.1	11989.2	12293.5	12673.9	10401.8	11114.8	12168.1	11407.1	12762.3	13056.5	13103.9	12232.1	12474.6	11793.3	13151.7	12147.1	11239.7	13601.8	12766.3	11985.6	13530.9	11431.7	13031.6	10339.9	11873.8	10883.5	11127.6	13336.8	11789.8	11674.9	12476.2	13072.8	11466.3	10190.9	11195.2	11252.7	11608.4	9772.17	11048.2	12333.8	12122.5
M187.11574T9.18	187.116	9.17511	-	-		220299	328362	336460	160312	239650	224491	289833	251341	152967	258384	192918	241964	92537.3	340583	289481	151992	230020	382237	281698	241742	298993	152562	148916	-45624.6	154797	271893	189394	253473	166672	278301	278108	333780	242282	162269	305979	343045	261813	260035	268213	241574	288167	267633	186912	288833
M188.0706T7.31	188.071	7.30891	-	-	[M+H-NH3]+ 204.09	149194	164383	153459	79985.3	147571	173703	182508	147761	154733	165440	180336	190285	159017	173321	171161	163164	144257	159890	221111	125530	127593	172138	184088	199143	179689	148806	191090	148836	143860	130683	160729	118325	196262	149813	166540	171172	168998	187510	162168	135359	168282	162164	142571	134697
M188.0706T7.57	188.071	7.56656	-	-	[M+H-NH3]+ 204.09	658875	613868	528890	422072	691382	696730	727231	597067	597646	740730	524028	543392	682054	681492	537952	434276	514718	514576	714197	509458	519132	592900	580953	693720	567669	517170	737901	524231	605501	474717	529201	439082	656531	647954	489979	580888	630276	640999	598574	552580	698636	687927	550243	598626
M188.09175T1.21	188.092	1.21123	-	-		7967.38	11229.5	9027.35	8965.34	12458.7	13813.8	8988.47	9771.94	8816.98	8278.95	17355.7	5400.2	9638.47	12367.6	14192.8	11429.9	7938.24	8074.22	15658	10487.8	9753.29	11254.4	8952.83	11112.2	13193.1	11421.8	8767.71	10309.1	7544.49	10325.5	11658	10317.5	11249.2	8307.66	12507	11093.2	11550.7	9886.9	6947.21	11890	12209.9	12795.9	11798.5	9794.91
M188.11761T9.17	188.118	9.1737	-	-		20910.2	36677.8	35946.5	16243.5	22307.5	23691.9	29772.4	25582.8	20853.9	26876.2	18907.5	23789.3	8873.71	34731.8	30264.5	15781.9	22713.4	39065.5	26034.9	24344.5	30029.7	15555.6	14555	-4147.25	15741	31062.9	20637.8	26518.9	22758.4	29651.7	31596.5	34550	25053.4	15574.2	33999.7	39744.8	27255	25333.7	28456.1	22383	28885.8	28400	19556.7	26940.7
M188.16436T9.63	188.164	9.6313	-	-		2091.47	4868.46	5250.56	3781.42	7321.02	6319.55	6008.43	5298.55	9016.09	3312.63	5721.2	6283.84	5652.37	2893.24	5951.5	9092.36	6021.54	6138.74	7070.63	3970.33	8127.63	2389.85	4952.54	2808.41	8604.32	7458.31	6422.24	7067.66	6801.64	5319.76	6991.39	3103.07	8173.77	5164.61	3743.47	7615.69	7415.62	6713.84	6344.02	3272.36	4963.7	5683.62	8102.33	10210.8
M189.07391T7.31	189.074	7.30929	-	-		17671.1	19508.4	21210.7	10951.4	19603	20836.5	21111	14084.6	19093.9	18133.8	20230.1	22784.2	19584.3	21710.3	21775.5	19291.4	20562.6	18047.3	25814.9	16208	17206.6	22940.4	20660.8	20339.7	19031.1	18991.2	21606	18227.8	18698.9	14468.1	18943.9	14177.4	26246.5	17688.1	19555.3	22886.1	19572.8	22726.3	20055.9	18794.4	21476	19987	17253.8	17810
M189.07397T7.57	189.074	7.56713	-	-		81093.7	86023.9	68883.7	53183.3	81260.7	82927	94123.2	74355.8	74994.1	88407	68660	65347.7	88105	86142.1	69661.5	55917.9	73252	64681.3	88400.8	62101.9	64467.9	75535.3	71401.5	88481	68034.4	66678.8	95081	67555.6	74998.6	56838.8	68113.3	58062.3	81092.6	76785.4	66000.5	75774.5	84292.3	78311.5	71436.1	74725.3	85012.8	87266.8	71941.5	73195.6
M189.08698T1.08	189.087	1.08055	-	-		157331	135669	132301	138773	145060	148823	138946	139658	145136	151277	146427	146314	147144	137651	146913	144999	139277	130967	136469	145684	142253	149184	140162	134541	134920	137814	131673	130154	136059	139541	139907	151836	147190	141282	148994	135921	146236	149393	147274	148216	134735	136400	154536	142622
M189.08698T1.27	189.087	1.26554	-	-		45142.9	54677.5	40686.3	46904.3	60055.5	46541.4	57469.1	47430.9	47295.1	47434.9	43443.3	52712.2	49989.7	47890.1	47865	48569.9	63808	49544.2	50813.5	65104.3	48799.4	48829.4	47860.2	39555.7	44926.6	50159.8	42066.2	50928.6	50651.4	43893.3	46758.1	49057.1	44294.6	47754.4	39949.2	45435.7	43584.5	51913.2	51071.7	45044	21380.9	41247.8	46396.4	58649
M189.12338T1.21	189.123	1.20805	-	-		47958.2	57360.9	56374.7	47593.1	54195.6	48397.5	55645.9	48809.3	50834.4	55759	44498.1	55174.7	39242.4	47310.1	44709.8	47948.1	54011.7	55765.3	50086.3	56036.6	44799.8	39544.5	45772.9	37534	30828.1	38296.2	36636.8	39599.2	42584.3	39903.6	39672.6	47241.8	39964.1	38980.4	37566.4	43635.1	41996.3	55245.9	34653.2	58016.5	47349.5	40972.3	49757.2	44413.2
M189.15974T0.84	189.16	0.841779	-	-	[M+H]+ 188.152	73558.5	83077.3	61911.1	62628.8	75498.5	93265.8	79035.4	82437.1	74510.5	81547.9	62432.3	89646.3	62207	72657.2	66432	89683.2	91290.4	75471	52127.1	72751.1	67517.4	88115.5	68058.7	59534.7	79609.3	77736.8	91664.3	84702.8	67410.5	83807.1	60525.2	171834	101984	83609.6	73341.6	80622.7	76565.7	92498.4	64628.5	67078.6	74611.3	76659.7	81220.9	89480.7
M190.00219T0.74	190.002	0.735918	-	-		15849	15522.9	14803	14118.2	15307.7	15879.7	15755	16741.7	14506.9	16509.6	15532.8	16972.6	16596.8	14264.9	14849.6	17396.6	16477	14899.7	17393	14740.5	15043.1	15413	16974.7	15837.2	13511.3	16204.7	19251.2	15131.6	17147.5	18038.9	16323.2	14506.7	16989.8	16163.3	15717.5	16754.4	14414.9	16057.3	15684.1	16318.4	14472.5	16152.6	15535.4	12930
M190.07637T7.57	190.076	7.56656	-	-		6390.08	7099.78	5285.84	4548.95	6733.66	5464.49	6402.99	6126.56	6175.41	7552.4	5314.76	5051.81	8093.25	7121.5	5153.51	6685.3	6180.07	4907.71	7081.15	6031.48	5210.85	6038.34	6914.02	8594.15	6097.73	4945.37	8863.96	5984.43	5056.96	4968.24	5601.97	5515.22	6449.06	8467.37	5187.08	6117.09	7775.9	5323.09	7176.23	6533.2	6211.84	7971.7	6017.75	5812.23
M190.08612T11.08	190.086	11.0825	-	-		7100.62	18656.2	10667.5	3405.1	21940.3	11373.7	8390.08	7285.61	17011.9	11517.1	17685.5	8866.44	6750.69	14906	7853.75	15715.9	8311.78	12516.2	6858.29	9392.7	6978.88	12754.4	15083.8	8242.64	17419.4	8840.6	8853.04	10282.1	6530.52	8628.24	6955.55	4913.8	7849.83	8318.13	7191.92	16556.3	9058.37	4620.45	4923.61	7899.46	8161.9	6001.37	8985.02	9623.4
M190.09017T1.08	190.09	1.08189	-	-		14680.3	11615.5	13530.4	13896.7	12489.3	13051.4	11598.4	14014	14127.9	12685.8	11660.5	13362.5	14466.3	12876.2	10450.3	12476.6	11938	12143.6	13268.1	13299.3	11955.3	12827.4	11530.7	12121.3	13472.1	13174.4	12719.4	13544.1	12434.9	12695.3	12095.1	12788.7	13043.3	11438.3	14402.6	12491.3	11527.8	13750.5	15290.5	11970.2	12193.2	12783.8	11888.2	13275.5
M190.14363T7.49	190.144	7.49287	-	-		4844.89	7347.81	3906.94	2204.79	5339.69	2854.87	3722.91	4554.86	6290.55	6615.69	4362.62	6068.87	4999.39	5098.16	2473.01	3877.8	7419.48	2122.65	4281.65	5339.88	2840.69	3470.62	5901.76	9713.04	6112.29	6547.34	7581.41	6943.95	4007.07	6518.98	4870.71	5025.21	3429.55	6312.65	3592.95	7117.42	1835.16	4275.39	1974.7	3288.93	6630.65	5541.52	8513.99	3630.01
M191.07673T0.81	191.077	0.814324	-	-		9903.31	12411.6	17499.4	15260.5	16677	14872.5	12829.3	12271	10947.9	13160.1	14975.2	11554.6	8061.83	11499.2	14361.6	12616.5	11004.1	8410.28	15191.2	14392.6	8868.07	13563.8	8919.33	17217.7	6410.4	10827.2	14675	9761.52	11406.4	8932.06	14236.6	12176.8	14574.5	5885.54	11178.6	12213.4	12922.4	13350.3	13994.1	14345.8	17579	12998	17494.1	10886.8
M191.17937T13.92	191.179	13.9213	-	-		5279.21	6553.17	6106.82	9087.05	7078.05	6262.23	10196	10863.4	9608.4	6417.22	5311.24	5461.49	6737.08	8022.06	9857.41	9487.17	10363.1	9080.86	9963.83	7179.99	6866.24	3740.4	9997.92	9569.14	6580.46	9541.93	11007.8	11342.8	9576.37	8277.61	5880.55	4697.51	8319.63	8298.97	7963.95	10163.2	9364.99	10920.6	10168.4	7913.92	2693.75	4944.45	3597.82	4934.12
M192.06551T6	192.066	6.00306	-	-		14450	11512	15694.2	8534.9	12613.4	14410	9018.94	16970.5	10571.3	15354	12274.4	13967.3	5810.21	11195.8	10861	10491.7	17810.2	17166.9	14570.5	12038.8	13742.2	20418.2	15282.1	8746.69	12888.2	16148.5	13048.6	8451.3	12550.8	17512.6	13662.7	15559.9	17184.1	14854.8	11408.4	16765.5	9411.07	14029	21006.3	10651.5	10958.1	14807.1	16981.3	17030.3
M192.9102T0.84	192.91	0.84083	-	-	[2M+Na]+ 84.9642	5996.85	6086.63	4984.77	4782.49	4890.07	6075.49	7903.79	5951.03	5006.47	5012.29	4248.16	4891.31	6479.88	4982.42	5804.06	6117.77	4642.07	7171.51	4718.63	5024.92	5687.62	6566.78	4349.02	6232.81	6031.42	7116.91	6131.58	5326.75	5591.49	5489.77	7099.76	5949.67	5410.68	4757.07	4945.38	6354.26	6353.67	8693.44	4853.21	6666.37	5092.18	5767.67	5634.76	4889.63
M193.03425T1.21	193.034	1.21449	-	-	[M+H]+ 192.027	25832.2	33957.2	27350.7	7309.32	23890.7	21825.4	32473.9	23800.9	32800	20401.7	24515.4	25629.5	27328.6	28180.2	23246.1	21735.2	31980.5	29551.1	29065.1	25472.1	37770.1	26075.6	24383.4	18968	27258.2	27571	23310.7	28664	26272.2	33700.1	12219.8	24501	21650.8	27999.5	29860.8	22831.8	28316.2	26712.9	24062.6	21769.2	24206.5	24858.9	21080.5	31138.1
M194.08113T8.83	194.081	8.82905	-	-	[M+H]+ 193.075	249755	488609	543148	369011	368862	376095	334014	368151	430865	318068	315356	315332	165814	513963	484601	435562	391199	359262	406939	333349	459493	456417	238356	13372.2	585517	358367	394170	388385	445744	367109	405507	568356	313226	344963	334440	534149	384517	522741	464770	291678	511810	408290	331392	474803
M195.0845T8.83	195.085	8.82894	-	-		26228.1	59928.5	57176.2	42487.3	47635.8	42546.8	39133.6	40887.6	50050.1	35143.1	41676.9	37547.4	19087.4	57685.8	52179.8	46123.8	47921.3	37349.7	43562.7	36092.3	49155.6	48341.4	25998.7	1482.79	60954	41208.5	42339.3	46210.8	43544	42050.5	47999.9	63351.3	35410.7	38740.4	37282.4	56883.9	43400.3	54492.5	47469.1	32517.2	53034	46150.9	39186.7	55565.9
M195.21059T14.11	195.211	14.1057	-	-		4343.08	5441.39	4995.69	5695.49	4659.66	5237.08	5851.4	7338.64	7252.21	3965.56	3731.17	4460.27	5318.23	7538.81	8791.57	9285.33	7968.87	7976.13	9105.56	6008.01	3309.06	3400.67	7724.37	5796.35	7187.91	7000.54	7184.8	9369.34	9505.89	8796.76	3751.91	4894.05	5275.8	5938.52	7905.6	7559.46	8338.09	8585.18	9966.37	6746.1	2957.82	2572.96	4466.84	4737.44
M196.06043T9.29	196.06	9.28559	-	-		3699.88	2924.69	6998.44	3066.89	3259.53	5030.37	8381.19	4881.34	3886.93	4462.24	3194.76	4312.2	2590.36	3929.11	319.807	2783.83	4505.25	4461.24	4447.07	3331.96	3653.87	3090.9	4183.75	15405.5	2473.75	4528.25	3925.1	3946.11	4829.16	3923.69	7011.69	1359.06	5273.43	3347.96	3998.12	1531.1	5572.51	2339.3	4664.12	4419.06	5976.61	6080.21	2441.74	3921.69
M196.06044T7.59	196.06	7.59008	-	-		6340.04	5951.78	8312.35	6365.11	5586.1	7664.79	5777.61	6001.46	6050.68	6212.12	2427.18	4868.47	5870.65	7481.42	4340.56	4686.05	4479.79	4478.05	6511.11	5771.85	6603.8	6824.96	6623.92	4023.11	5187.54	4431.31	5574.52	7190.79	7816.39	7019.22	5931.66	4808.18	7001.99	4938.81	5577.21	6562.06	5928.04	8187.96	4866.09	6284.73	8562.67	5605.81	3848.73	5577.74
M197.12847T7.56	197.128	7.56328	-	-	[M+Na]+ 174.138	58678.5	67993.4	68457	44869	58850.5	77016.5	69750.8	52082.8	48699	85992.9	57660.5	45734.1	51339.2	53081.5	51271.9	52585.2	58742.2	59129.9	47484.2	52707.2	78348.3	65567.9	82438.9	81402.1	47751	53172.9	61247.5	50465.5	59117.1	43903	54672.2	52916.4	65358	56797.9	43718.4	46058.5	43742.3	47975.4	52127.2	35210.1	63908.2	51452.7	54186.7	53598.9
M198.93999T0.74	198.94	0.735675	-	-	[3M+Na+K-H]+ 45.9982	103112	95431.7	100748	84696.1	91095.7	101054	110269	86248.9	97847.9	98526.2	86845	93123.4	89260	94066.3	102789	105422	95040.3	92197.9	98208.9	100187	97762	102411	97832.8	104245	105621	105641	97983.2	88593.6	110548	97861	84838.9	87522	96001.3	87313.9	85346.5	107324	108098	88320.9	108394	72989.8	99053.8	103348	95423.2	100284
M199.9414T0.74_1	199.941	0.738001	-	-		15587	15388.6	15369.9	12684.4	14135.6	16773.3	18037.7	13481.9	16960.8	14911.7	13190.5	15103.4	14314.8	13952	16200.9	17434.8	15242.1	13315.2	14340.4	13431.3	14085.2	18188.9	15395.4	15595.7	14957.1	16277.2	14068.1	13072.8	17730.4	15011.9	14955.3	11390.5	14773	13367.4	11344.2	17131.8	16190.7	14056.9	14378.3	12535.9	16357.7	15560.6	15660.3	19871.3
M200.93771T0.74_1	200.938	0.735259	-	-		16199.8	13931.5	13908.7	12871.3	13303.8	15475.5	16810.6	13524.6	12084.7	13919.5	14450.1	14526.1	14797.7	14712.8	15972.9	18153.9	15160.3	13721.5	14568.1	12731.9	13300.6	14282	13661.3	14550.4	15482.2	15491.5	13937.3	13737	15390.6	14158.8	13885.1	11942.9	14310.4	13617.8	12953	16102.6	13552.6	17112	17640.3	11213.9	15490.7	16137.5	17240.8	18455.3
M201.6519T0.74_1	201.652	0.735555	-	-	[M+K]+ 162.686 [M+Na]+ 178.664	2669.21	2445.44	2989.56	2167.58	2804.71	2478.67	2450.24	2334.83	2631.91	2226.13	2083.92	2849.14	2418.2	2826.85	3796.91	2734.15	2995.83	3368.02	2669.66	3344.44	2910.57	3074.52	2725.47	2823.77	2597.78	2887.31	3122.04	3229.71	2359.67	2818.14	2350.94	3072.41	1841.38	2511	3153.32	2558.14	2599.23	2029.06	3901.79	2560.31	2240.22	2594.81	3597.09	2440.54
M202.04744T8.39	202.047	8.38816	-	-	[M+Na]+ 179.058	251545	357698	336852	224840	296274	307528	296441	316464	338868	250377	261844	275306	180723	282286	253212	219506	316794	301433	246747	236772	254292	256736	257433	177309	175776	279595	269286	328544	246942	300497	251622	291497	298953	229618	317860	320957	302790	333871	280737	289389	319470	284235	247882	279405
M202.08622T7.45	202.086	7.44868	-	-		9059.79	7209.61	3951.43	1503.23	6799.32	1071.49	4687.53	6937.39	3431.12	4133.75	6519.43	5763.54	3875.3	3556.59	4725.76	4939.96	13157.2	15485.2	6324.09	4167.64	6566.51	5015.09	5503.1	8468.19	3348.4	4174.65	4911.08	7659.63	6418.25	5423.96	5208.17	5033.29	7168.79	5242.48	3857.27	6190.28	3169.09	4142.76	3286.87	3460.17	5290.57	4674.67	5187.39	5239.64
M202.93287T0.74_1	202.933	0.736872	-	-		3232.9	2079.31	3336.11	1753.73	3112.44	2416.66	2603.63	2613.83	2572.95	2805.42	2167.71	2386.35	2751.41	2566.95	2340.14	3485.34	2670.3	2212.86	2558.49	2542.82	3220.29	2347.57	1940.6	2803.17	2585.13	1996.01	3291.66	2625.82	2030.8	2012.05	2345.17	1746.39	1945.95	1569.95	1536.6	2354.62	2036.59	2225.65	1656.49	1615.1	2528.32	2305.53	1914.26	1812.32
M203.05077T8.39	203.051	8.38767	-	-		25060.6	37740	36962.7	24003.1	30936.9	32637.6	31005.2	34515.6	38870.8	26321.6	28517	33016.5	19277.5	27804	27971.3	23999.3	36173.4	37125.1	25205.6	24704.1	28277	30165.2	30256.5	20990.2	21954.1	33177.7	29536.7	35185.1	30048.3	34269.7	30395.1	31922.3	32812.3	25134.1	33120.9	35265.7	29771.1	36771.4	28156.9	36893.2	33448.1	27502.4	27718.3	27542.3
M203.05258T0.92	203.053	0.924685	-	-	[M+Na]+ 180.065	571977	608336	654972	449800	641122	561492	585049	534942	663959	575580	495384	602809	464536	481951	561757	557032	531886	602888	547134	596204	480227	570824	491201	539755	502808	543693	563609	455617	542943	548446	528726	496964	677225	616498	533063	543653	557280	668258	676471	489486	503145	569572	635385	577329
M203.05263T1.12	203.053	1.11561	-	-		14679	12926.5	14288.4	19265.9	9574.38	23045.8	9201.52	11492.2	7632.12	577.569	10462.4	21255	12138.8	8388.91	10113.3	8341.63	7778.16	21506.4	10149.1	11477.9	12438	12750.3	8683.09	10757.6	2027.51	7996.89	8490.19	11162.1	9473.03	17433.6	8905.36	13816.4	12345	12077.3	3805.72	13322.9	11419.5	10090.8	10858.3	17262	13106.3	13150.1	30612	15582.7
M204.05428T0.74_2	204.054	0.735918	-	-	[3M+K]+ 55.026	2374.48	2750.11	2716.16	1916.16	2378.3	3226.84	2516.72	1986.66	3213.9	2726.17	2522.75	2385.7	3106.75	3243.45	2412.9	2844.17	2154.34	2652.57	2251.44	2858.93	2622.7	2405.93	2356.38	2155.52	2567.95	2094.11	2986.64	2093.3	2393.11	2623.27	2301.87	2161.12	2691.93	2610.47	2264.74	1731.77	1947.17	2615.99	2892.74	1849.82	2207.52	3201.36	2664.46	2758.13
M204.05607T0.93	204.056	0.925724	-	-		42145.9	41920.2	42972.9	32482.8	44784.4	38814.7	39111.5	40240.8	47074.3	41690.5	38495	43550.5	34186.8	35087.4	38860	41322.2	37349.8	41949.7	37598.8	40649.2	35686.1	43509.3	34823.3	36130.9	31413.6	35587.2	38675.8	29426.3	36047.5	40062.8	35149.9	34615.5	40988.6	40525.3	32748.2	34140.9	35600.6	44596.9	43185.5	30449.7	33839.4	40272.9	45719	40558.8
M204.12304T1.21	204.123	1.21358	-	-		280156	367755	399526	318355	266163	243746	341505	635888	611179	279538	382011	312571	364248	419512	368875	293600	536928	394048	351719	420275	358979	291853	286799	616939	514492	297111	307039	316142	305800	310729	407345	337516	233991	331713	289893	280505	320839	442604	373979	348653	327096	318583	475341	391539
M205.05716T0.93	205.057	0.925737	-	-		8378.22	10871.1	7347.86	9635.51	6892.35	9803.23	9996.67	9815.06	9999.81	11077.5	7679.57	9951.1	4863.88	6847.78	5983.31	9254.35	9523.37	9532.3	20939	9344.66	8510.21	18410.2	5111.98	6181.79	8922.97	7871.93	8825.72	6477.61	8079.51	4864.88	8756.33	4807.32	9746.58	8718.45	8638.15	5571.47	7986.14	6786.16	9760.64	6198.91	6666.17	6225.46	10885.9	49398.9
M205.0819T0.98	205.082	0.98054	-	-		15196.6	18929.9	15664.2	8332.57	14000.2	16266.3	13331.5	15061.1	21614.1	18112.4	7471.29	17988.3	12116	13583.2	13435.3	14527.7	12244	10949.2	15031.4	12582.1	11419.3	16781.6	15587.6	11184.6	11871.4	13795.2	18247.5	13253.2	9969.44	12431.4	12043.2	16263.4	18260.2	10673.1	11417.1	14637.2	18077.2	20491.8	21124.1	12696.5	12500	14093.9	22546.3	16989.8
M205.09711T7.31	205.097	7.30891	-	-	[M+H]+ 204.09	500992	531207	554471	279101	512319	586445	624154	465361	513077	543336	571286	600970	509040	532715	611978	542849	507781	566808	767999	420940	420480	590158	600525	638335	595112	533262	674802	527694	480595	456389	545150	410183	675463	498280	501888	561891	551604	585978	537620	440196	588417	526154	438293	470323
M205.0971T7.57	205.097	7.5656	-	-	[M+H]+ 204.09	2.31478e+06	2.19248e+06	1.92354e+06	1.54496e+06	2.38378e+06	2.41727e+06	2.48322e+06	2.07373e+06	2.07723e+06	2.53398e+06	1.80114e+06	1.79942e+06	2.339e+06	2.3051e+06	1.9536e+06	1.61827e+06	1.84533e+06	1.83995e+06	2.58374e+06	1.71075e+06	1.74412e+06	2.04066e+06	2.03821e+06	2.5495e+06	2.06731e+06	1.93571e+06	2.76556e+06	1.88362e+06	2.15697e+06	1.73877e+06	1.90408e+06	1.62382e+06	2.31054e+06	2.34512e+06	1.56508e+06	1.95169e+06	2.19545e+06	2.26166e+06	2.0615e+06	1.93586e+06	2.43257e+06	2.24808e+06	1.81404e+06	1.94169e+06
M205.11829T1.01	205.118	1.01153	-	-		60792	62347.6	59388.6	55686.8	60167.7	63760	62212.9	54714.7	63596.7	65014.4	59803.1	52216.7	55836	64252.8	66043.4	59422.2	52863.6	45946.6	60898.2	53243	59835	74295.6	58093.7	64703.2	18390.3	65509.3	49296.2	56078.4	57959	67891.6	60504.8	56884	66685.8	64827.4	93383.3	60149.5	83400.7	74323.1	66815.6	59266.9	44517.9	47748.5	73481.9	68012.8
M206.07879T9.06	206.079	9.05778	-	-	[M+Na]+ 183.09	10479.6	24110.5	31056.2	14017.5	23171.6	15129.1	18529.8	17998.4	8373.3	17562.3	25069.1	16669.8	4671.18	24982.5	20043.7	12699.2	16207.4	27049	27340.7	15728.9	22101.1	12532.2	4552.8	-587.473	14081.9	20147.5	14728.5	18202.4	6905.35	16490.8	6227.05	23879.8	16872.1	12268.6	18229.5	28547.3	16193.3	16329.9	24508.1	17768.4	19768.3	17428.1	13122.3	17268.2
M206.08109T9.91	206.081	9.90616	-	-	[M+3H-HCOOH]3+ 661.217	35478.8	32310.2	37376.2	34517.5	24255.9	33990.1	35164.8	27453.9	20151.8	10034.5	23682.9	49677.1	25780.6	31579.2	39391.5	26090.9	45742.2	40004.1	42234.8	33265.7	41070.7	38752.9	34800.2	35156.9	12570.1	35319.6	36777	31180.2	32584.9	38726.7	53879.6	38751.2	37302.5	39078.7	31234	25444.9	32670.3	31983.9	28815.7	32998.6	32617.3	30921.1	31885.7	37102.5
M206.10039T7.31	206.1	7.30867	-	-		61398.7	63254.3	69347.7	36719.8	67297.7	74370.6	80562.5	42666.8	69026.1	62064.6	77055	78000	62768.6	74476.9	73842.9	68944.7	58859.2	64794.7	89458.1	59244.6	58042.1	74136.1	76960.9	78580.4	69309.7	64694.4	77123.3	64224.4	58439.1	54053.6	63960.3	46013.6	77873.2	62195.2	68381.4	70730.4	68830.2	80125	66083.9	55722.1	73412.1	65140.1	58522.2	56092.2
M206.10039T7.57	206.1	7.56602	-	-		270916	266805	225250	176714	292802	308422	309881	238915	255374	307423	223077	225949	294968	291443	222114	187690	214268	208753	299374	209149	221274	263912	248200	292190	243789	231707	328156	232385	272770	204611	237848	212351	292410	282046	213492	262902	279740	277879	268516	246439	319630	314748	256873	268030
M207.10279T7.31	207.103	7.31165	-	-		6338.29	6226.5	6981.11	3655.26	6789.91	7146.99	7843.6	3941.79	6426.36	6520.42	7003.76	8524.56	6434.66	6286.27	6937.2	6987.61	5103.49	5804.33	7556.63	4594.94	4868.7	7829.92	7366.22	7684.86	6405.13	7589.47	7656.69	5276.59	6980.7	5822.65	6740.05	5151.1	8299.85	7017.7	7004.64	7042.41	7214.82	7558.98	8080.65	5724.95	7293.14	6203.4	6196.25	5184.64
M207.10281T7.57	207.103	7.56713	-	-		24896.4	23946.8	21021.6	15670.9	27986.3	24234.2	27638.6	23672.7	24962.1	33275.6	23811.2	19157.4	26067.2	26102	23967.7	18775.8	19609.1	22466.4	25921.5	16912.4	19099.2	23023.1	23087.8	26384	20029.1	20099.4	28318.4	21255.4	23365	17990.1	19989	15248.8	23784.6	26432.2	19119.1	23378.4	24616.8	25439.1	24303.3	20899.5	28906	27143.2	23447.3	22335.3
M208.04439T8.39	208.044	8.39299	-	-		5711.56	4594.55	4837.86	3889.4	4793.85	3972.17	4867.32	4394.86	4251.89	4546.6	5167.99	4017.07	4800.2	4017.74	3527.35	3955.89	4892.99	4355.27	3496.53	3984.24	4578.52	4147.07	4497.38	3794.81	3702.67	4323.34	5357.25	5342.81	5224.9	5505.96	5147.64	5242.17	5476.92	5514.1	7492.44	4613.5	5502	5656.14	4429.64	6036.43	6113.09	5430.52	6315.56	5753.21
M208.09439T9.18	208.094	9.183	-	-	[M+Na]+ 185.106	75167.6	107745	125845	55088.1	85735.5	72694.6	100930	88532.6	70520.3	82556.3	74656.4	81868.6	29556.8	118740	97126.4	50126.9	76779.2	126645	69378.3	78251.1	79679.7	48714.3	47322.4	-15317.7	52587.9	98538.9	67824.1	89488.5	67395.7	95727.7	107940	112046	84182.3	50964.9	111443	119204	90611.7	91213.1	83103.5	90116.4	94698.3	86384.9	59468.8	87792.4
M208.97577T0.74	208.976	0.73815	-	-		6243.98	7697.99	9239.48	8625.43	8045.58	10144.9	7741.84	9651.34	8066.27	8731.77	7739.28	7215.19	7908.77	9522.79	9643.6	8544.54	7667.8	6458.45	10660.6	7145.51	7863.77	7130.28	8901.13	8609.26	7092.71	6956.92	9332.36	7637.47	7131.54	8161.36	8675.69	5978.15	7977.03	11349.1	9994.79	9065.6	9719.23	7367.71	7502.15	9667.6	8759.75	9752.54	7875.13	7618.47
M209.09208T2.76	209.092	2.75802	-	-		16523.3	7875.92	24385.1	19522.4	15708.2	25224.8	23996.9	25200	17065.3	20157.5	30036.5	24590	12153.7	27099.5	29670.1	26891.3	34738.1	32891.4	35049.3	17891.4	31323	42317.8	26054.9	16649.9	28032	23501.1	24328.6	14581.9	22404.2	21764.9	24089.2	24683.3	20906.2	14630.4	25799.6	34393.4	21564.9	17710.7	22905.2	17156.1	25086.6	29663.1	21952	31217.7
M209.09209T3.08	209.092	3.0809	-	-		26252	24875.8	31313.3	13885.7	24078.3	27005.1	21217.3	31990.6	20753.4	19038.3	23847.6	30669.6	6523.21	17758.1	22495.6	15812.2	24674.4	32253.2	27338.1	19090	21294.3	47224.7	28187.8	13884.3	26123.7	20908.2	24930.8	16466.9	17550.4	21177.3	23075.7	20634.9	33967.9	15846.5	21513.3	33496.4	11720.8	32604.1	37709.8	20601.8	22346.7	16409.4	26883.4	38707.8
M209.09209T6	209.092	5.99922	-	-	[M+Na]+ 186.107	98074	78783.3	111994	62809.4	94842.8	103292	75881.3	133504	78028.9	116779	75897.5	90371.5	44135.8	70761.6	74263	71951.5	103747	116737	101668	84614.8	91648	144657	97573.2	55974.1	90223.9	82739.6	82739.6	52734.8	86002.7	105250	96368.1	114285	105224	88564	66725.4	105153	68728.6	86557.9	128821	76011.1	82969.2	96235.2	107702	115039
M209.18998T13.96	209.19	13.9649	-	-	[M+H]+ 208.183	16143.1	22508.5	18622.7	20827.3	21498.2	21209.3	30226.8	27970.1	27499.5	16165.4	14916.1	12888.2	21767	23782.5	25248.7	29706.8	28959.5	27871.7	34216.8	19164.2	10858.3	12565.2	19969.1	25544.6	19228.7	24868.4	26482.7	28674.9	27415.4	23777.8	11446.9	14222.4	19029.2	20247.9	24444	22356.7	30541.6	36619.7	29812.3	23510.2	6443.73	9813.72	14828.2	18067.4
M210.06083T1.63	210.061	1.63015	-	-	[M+H+NH3]+ 192.027	11501.1	10779.7	9603.91	2051.96	9121.02	10951.8	11167.9	7003.53	12745.6	9235.64	5022.34	8175.21	9973.86	9677.88	7314.67	9118.28	10851.2	8865.71	9697.26	7722.9	8362.74	10902.5	7665.75	7476.88	7085.36	7200.31	9813.05	8736.99	10568.8	10388	3585.21	7795.56	8541.63	10252.7	9098.73	8934.86	10211	8393.36	8729.89	7603.69	8956.09	8327.56	7777.03	12062.3
M210.0761T7.23	210.076	7.22591	-	-		4587.03	5062.67	3012.13	3086.71	4121.85	5258.59	5271.99	5573.22	5590.42	3487.91	2874.5	4304.55	3290.09	2849.84	2849.08	4852.01	7903.12	3379.87	4579.92	4322.09	4342.46	6108.76	4983.89	3968.12	6034.85	3965.36	6848.61	7364.87	7102.73	4915.62	6197.42	6046.63	2455.66	4813.54	4850.55	5347.1	4538.77	8490.68	4490.69	4741.46	9041.38	4734.5	3957.94	8816.97
M210.09534T6	210.095	5.99829	-	-		12393.9	7925.9	10358.8	7451.49	11867.3	10285.6	7522.47	15695.1	9173.8	12216.8	8247.04	9434.8	4559.38	7712.5	8426.4	7494.73	11275.2	13635.3	11927.1	9910.62	9477.7	15857.1	10146.3	6460.37	8798.18	7777.74	8600.29	6011.62	9721.31	10525.9	10286.2	13182.8	11373.9	10440.4	9177.52	13261.9	9210.94	10761.3	14160.3	8339.67	9049.99	10964	14619.3	12951.2
M211.0035T9.12	211.003	9.1208	-	-		8790.24	10279.2	11416.1	7054.96	9715.34	9692.7	10476.7	9595	11512.9	11003.2	10990.9	9954.68	8624.24	9058.37	11667.5	11058.3	8990.19	7578.96	8625.64	8981.59	10058.5	10111.3	9806.4	9770.66	10180.9	8174.33	9966.35	11668	12442.7	8501.9	8339.74	8814.29	8478.79	12355.8	10413.4	9479.15	11771.3	11293.8	9448.73	9517.19	10540.8	9968.26	7986.18	9427.62
M212.11824T8.84	212.118	8.83504	-	-		18049.2	17763.7	9080.06	9086.49	2143.57	142672	7386.5	10718	22502.5	65219.5	25727.9	-1244.62	3666.09	3692.39	2799.66	1078.06	6361.97	-1376.84	18565	7719.05	18763.3	44276.6	97193	4612.66	-1110.4	117726	3227.78	10305.3	18072.2	49184.5	20224.8	2469.11	24860.4	2408.26	9505.18	40239.7	4473.85	7065.72	19262.2	18609.1	434.991	7768.89	3301.74	7684.75
M212.98296T7.12	212.983	7.12452	-	-		2560.73	7333.17	6115.84	2765.71	4830.23	3474.59	5242.65	4345.06	4910.58	5301.94	6162.6	3572.68	2981.33	4784.59	3917.77	3604.89	3527.28	4407.47	3601.34	3656.25	5529.82	3121.38	3375.63	2114.59	3088.29	3720.79	3578.24	4277.65	1930.1	3811.81	2471.48	3904.78	3495.14	2980.45	3921.76	5197.35	3846.27	2720.52	4007.47	3067	3784.01	3276.87	2934.76	3700.91
M214.09138T9.19	214.091	9.18832	-	-	[M+H-CO2]+ 257.067	3062.45	4260.64	5613.72	2524.33	5803.07	4179.12	5791.83	5916.24	3959.62	4809.96	4185.71	3901.47	3785.34	6171.38	4844.74	2132.61	4539.67	6587.12	5150	4338.48	4901.28	1305.75	4892.63	-634.875	2589.44	5435.79	2996.06	3930.28	3649.87	3891.92	4143.6	4189.66	4774.76	2184.62	5679.77	3778.45	4593.38	4829.57	4901.75	4140.9	4467.28	3596.72	2519.44	4377.5
M214.91753T0.74	214.918	0.735918	-	-	[3M+2K-H]+ 45.9982	330266	345284	355478	330410	348206	359082	353574	303516	348798	313501	309084	332351	338863	326377	343427	344416	333810	359469	351350	342313	339295	342320	331831	331057	303802	310814	342129	301723	321773	342949	319548	268110	371037	352497	335689	334595	316805	337686	351945	273194	346177	335652	324868	351778
M215.01621T1.22	215.016	1.21747	-	-	[M+Na]+ 192.027	124517	219883	135289	52965	137643	145635	166429	125962	206693	137370	139673	157122	158412	187690	171384	152886	192069	152942	157231	134752	180047	160853	157778	133728	161305	166425	164725	149379	189249	168756	82416	126340	129322	199103	159680	159685	183838	150842	135795	104877	141027	148258	118524	184235
M215.01627T1.63	215.016	1.62507	-	-	[M+Na]+ 192.027	18228.7	22409.2	18748.8	3989.39	15596.1	20775.7	20018.8	15193.3	20918.9	15174	11331.6	16413.6	16072.6	18828.8	15164.6	17146.6	20968.3	18104.2	20996.3	15763.1	20183.5	20471.7	18081.4	15495.1	17311	16805.5	19174.4	17019.7	22343.6	20285.1	7102.96	17679.8	19497.7	19919.8	16014	21170.8	21738.8	17355.5	21034.7	13142.5	18482.9	20699.9	16621.1	19419.3
M215.6676T0.73_1	215.668	0.732344	-	-		2779.94	2124.28	2716.89	2549.94	2141.02	2624.56	2963.58	2237.38	2655.36	2699.89	1729.18	3079.25	2654.71	3577.83	2998.18	2580.92	3043.28	2066.81	3617.57	2891.07	3092.01	2652.12	2580.35	3204.49	3022.8	1953.98	2886.56	2780.07	2762.82	2427.99	1887.66	2454.1	2204.21	1606.69	2216.6	2176.8	1781.28	2012.03	2613.83	2125.68	2100.7	2614.63	2950.75	2518.11
M215.92102T0.74_2	215.921	0.736865	-	-		12781	13954.6	14971.6	13194.8	13439.7	13822.9	12528	11155.3	14205.3	13554.2	12360	13053.4	11335.7	13165.3	12907.8	12283.1	10642.6	13829.5	14606	13184.3	13835.5	12173.4	15043.8	13545	11397.1	10202.3	10494.7	11541.9	10560.6	11410.2	9891.2	9265.62	13746	11892.2	9406.72	10450.4	11538.1	10961.3	10317.9	8284.88	11627.2	10796.4	13277.3	12649
M216.01959T1.22	216.02	1.21747	-	-		6663.5	13519.4	9140.7	3016.68	10332.3	9652.69	10210	8627.98	12958.5	7254.04	8229.98	9775.72	10816.7	12138.8	11768	8456.51	13578.1	11184.3	11085.9	10603.3	13879.8	9487.27	10390.4	9011.85	13208	11704.8	10948.9	10274.9	12247.4	12114.8	6059.96	8993.45	9492.12	13427.2	10144.8	10580.3	12045.5	8242.66	11155.6	7305.78	9521.18	11024.9	9010.64	10538.6
M216.06313T8.83	216.063	8.82927	-	-	[M+Na]+ 193.075	14645.4	24685.1	26890.8	19802.5	19919.7	20000.7	17814	19631.1	19951.5	19129.8	15934.9	17150.4	7704.21	25418.1	19553.5	20752.5	19938.3	20506.7	16505.3	21370.5	25989.6	27357.4	14052.5	448.445	32638.7	22117.4	23975.1	22059.6	26640.6	21091.5	21194.1	38203.9	19219.1	18784.5	19260.5	29676.4	22387.5	32102.7	31521.7	16864.3	29857.5	23002.5	18310.1	30045.7
M216.95064T0.74	216.951	0.735482	-	-		60429.4	59043.6	63734.1	50944.5	58150.3	61066.5	66320.3	59203.3	59930.7	68651.6	66355.9	62456.8	59882.7	62864.5	62725.7	65315.2	61435.5	65491.2	62515.5	59061.4	56641.3	66502.9	55073.2	60160.8	60195.7	65167	63678.4	60453.1	74092.7	60483.8	61375	61025.9	66012.6	57175.4	54839.5	67573.9	71562.2	65434	68720.3	49667.7	60097.1	69509	60470.3	64889.8
M217.08188T1.01	217.082	1.00867	-	-	[2M+Na+K-H]+ 78.0685	336824	362621	270137	267539	260535	315486	283749	278462	390799	268576	228795	269183	254391	261727	264615	290859	243035	255438	218309	272582	245075	283462	265757	266563	275544	276731	275063	268769	175364	290886	195414	283271	291520	264965	304676	284665	278406	330278	361037	289000	261640	284934	272564	250997
M217.15463T1.21	217.155	1.21449	-	-		5019.91	5965.71	4674.65	6698.41	6870.5	6082.7	4928.12	5757.45	6246.77	4297.78	4763.9	4994.86	4547.93	5254.18	4753.8	4751.43	4645.36	3941.7	4582.52	4669.8	3854.19	4491.81	5516.27	3746.21	4342.03	4809.9	3635.72	4929.6	3987.99	4614.22	3648.03	4654.18	5376.63	5078.84	4438.89	5459.15	5022.49	4023.3	5326.3	4069.16	4816.91	4275.76	4658.77	6387.46
M217.952T0.74	217.952	0.735603	-	-		9725.7	10291.9	10151.2	9107.47	10603.5	10672.8	12150	10486.1	10475.9	10422.7	9785.25	9946.23	11030.7	9968.98	10763.9	11581.9	9210.6	9905.12	9474.28	9978.57	7148.77	8572.75	8414.74	8760.03	8936.58	9718.05	9825.04	8617.14	11774.6	9759.2	8579	8797.44	9215.33	8723.6	8773.68	8647.56	10143.3	8553.75	8731.45	8075.58	8968.74	11320.9	9668.62	10846.9
M218.02123T8.39	218.021	8.38937	-	-	[M+K]+ 179.058	14267	17970.5	18443.8	14141.5	14793.3	18191.4	19198.8	17507	21166.1	14906	17180.3	16099.9	12106.1	18796.6	17178.9	14415.7	18729.9	19655.5	14710	12664.6	12292.7	17055.7	16203.6	11995.5	14262.6	16970.5	16491.1	18947.5	15394.5	22353.3	20640.2	20023.9	22020.4	15828.6	19525.6	19436.5	20694.5	19333.6	18823.8	20277	18965.4	17264.5	14164	17401.6
M218.08513T1.01	218.085	1.00979	-	-		35128.2	29781.8	27473.9	27830.1	23628.9	28435.7	27661.7	26690.5	30717.1	23215.4	24120.8	23629	23558.7	24533	23690	24644.2	22481.3	21544.3	19251	24625.7	22243.1	25741.4	24365.3	24402	26279.7	26032.1	25939.7	25220.3	14992.9	25859.9	20482.6	27385.6	29255.7	25660.7	31699.7	28947.2	27303.3	30685	33669	27565.4	24345	28318.6	29232.3	25327.5
M218.13871T1.22	218.139	1.21758	-	-	[M+H+HCOOH]+ 171.127	54083.4	259210	228794	103571	127066	114498	126223	125076	152034	127569	270459	115784	60834.6	136125	205634	115995	133498	160187	41825.3	120652	65241.3	107166	73797.1	125673	95906.8	115368	106724	117676	37516.7	64419	17239.4	98418.8	132363	102740	120525	158926	119725	80881.2	341346	53829.7	119949	97962.2	117937	114866
M218.91047T0.74_1	218.91	0.739918	-	-		14938	13921.3	13989.2	16216.5	15424.3	16221.2	14891.1	12769.7	15125.6	13893.9	11985.8	12968.9	13465.4	15478.3	13939.2	14905.9	13394.8	15769.8	16903.9	15323.5	15647.1	15298.9	16385.6	14433.3	13291	14172.2	16536.5	12264.6	13094.2	15955.9	16335.1	13167	16536.8	16328	15683.3	15731.9	13640.5	14965.5	16560.6	15376.8	15564.2	15100.3	15102.8	16078.6
M218.94851T0.74_2	218.949	0.736865	-	-		10618.5	11635.6	11098.1	17113.4	10847.8	10155.5	16228.2	13867.2	12334.4	14774.5	12104.3	10986.9	10212.7	11103.3	10851.6	10321.8	10762.7	8042.6	11331	9547.23	11994.5	17134.4	9469.74	10987.3	11530.6	11557.8	17106.7	12537	12152	11128	9846.63	13926.5	10165.9	7840.56	7793.54	8977.93	11575.3	14862.7	15827.4	8683.55	8154.23	14469.9	9600.97	11226.2
M219.0265T0.92	219.027	0.918094	-	-	[M+K]+ 180.065	93890.9	90698.5	90638.4	66439.4	90362.9	85551	99951.4	73898.9	96042.2	80111.3	67117.4	84498.3	77017.4	72521.9	80441.1	81771.8	75050.2	81229.8	75548.5	91472.9	71381.7	92204.1	67461.2	69450	75481	82559.3	86965.7	66688.9	68793.2	82866.1	78743	81559.8	90029.3	85893.2	79416.1	82680.5	89583.1	121050	95568.4	76350	65512.1	82299.9	104974	81650.8
M219.09757T1.21	219.098	1.20883	-	-		15292.8	26304.4	19228.8	9961.37	24864.6	20281.3	17607.3	17062.1	37597.8	22401.7	21709.6	20769.6	19642.6	24700.6	29733	19437.3	24020.3	22612.4	24476.4	23748.6	17310.6	18022.1	17115.6	18049.3	17757.9	23623.9	27126.1	22574.4	18518	18767.4	11012.8	15361.1	21333.2	14429.6	13132.4	22090.4	27975.1	22474.3	14195.9	15630.8	19506.3	19466.9	26085.7	21337.2
M220.11797T6.89	220.118	6.88563	-	-		11815.6	12084.9	9464.55	8269.99	11243.8	5730.84	7024.43	8711.02	8869.36	5396.41	5106.72	11614.5	9996.38	12093.2	11524.3	9199.98	11868.5	7410.1	11825.3	8140.55	8920.69	9672.21	9606.35	8840.7	11036.8	10084.8	7452.73	8015.96	10851	5770.04	6462.14	8857.3	7346.64	8782.58	9155.7	10309.4	11573.2	4640.01	6373.18	9936.69	10769.8	12962.9	9516.24	6141.75
M221.06336T0.93	221.063	0.925292	-	-		5849.1	7258.73	7726.72	4449.74	6818.94	5422.69	6783.96	6130.63	8129.42	7822.11	5377.22	6006.44	7270.68	5764.46	6970.74	7758.29	5338.86	6988.99	6463.98	6223.42	4456.52	6795.08	5771.56	4192.38	5120.28	6468.78	6437.37	3647.19	4992.19	4886.85	4550.58	3917.44	5562.34	4653.41	4948.78	4900.85	5707.61	6354.96	7403	4538.16	4829.99	5713.79	5985.86	6078.47
M223.0747T9.13	223.075	9.12785	-	-		6937.12	9653.77	9524	7156.37	10708.6	10631	10147.4	7780.96	11245.1	7956.99	10095.4	7214.94	7506.64	8375.36	12452.4	10262.5	6158.62	5578.03	10854.4	6519.57	8057.26	8843.41	7110.82	4491.86	8816.47	4357.53	7506.8	9713.2	7720.04	6583	4882.49	6672.29	6002.71	10185.2	6870.63	10494	10113.6	7722.9	9243.17	7324.27	9248.42	8491.26	6642.65	6321.22
M223.98898T0.74_2	223.989	0.73541	-	-	[M+Na+CF3COOH]+ 67.01 [3M+Na]+ 67.01	42985.2	37150.3	44060.8	36154.1	34313.9	42087	43429.3	36667.2	41061	43316.2	40409.9	41884	38414.1	42340.2	53683.1	46260.6	44672	41257.9	45103.3	38473	40845	49689	38367.8	44464.1	52483.6	54868.6	39155.2	41857.5	57124.3	38854.9	37705.2	40140.5	41377.7	37812.6	32227.7	46920.8	49010.1	42217.9	43124.5	35245.7	40590.9	49053.7	44178.2	47053.3
M224.99024T0.74	224.99	0.735555	-	-		16337.1	11141.3	12824.4	10331.6	11166.8	11917	15593.9	10260.5	15304.1	11130.9	11722.2	14492.6	9492.05	11826.2	14381.6	15134.2	14676.2	12108.4	13887.6	13160.5	13329.8	13685.7	12420.5	15176.6	16893.1	18426.8	14117.7	13951.9	17525.9	12772.4	10228.5	14555.4	12592.5	11689.6	11925.7	15897.6	16886.6	14800.8	15302.5	11050	16596.8	17066.8	12620.2	14983.8
M225.01593T0.92_1	225.016	0.924919	-	-		5008.93	3225.44	3171.43	2527.18	4614.4	2717.91	3388.42	3637.96	2025.1	3201.53	2613.72	3488.12	3094.69	2779.3	2540.14	3039.69	5357.48	3784.51	2395.07	2981.67	2371.31	3415.53	2937.39	3033.99	1956.51	3488.13	2069.69	2786.6	3492.97	3168.29	2887.52	3621.34	3776.92	3026.1	2449.62	3467.83	2533.66	3855.11	3159.71	3372.05	4131.12	4590.24	4402.82	2759.4
M225.03447T0.92_2	225.034	0.92276	-	-	[M+2Na-H]+ 180.065	5403.51	4907.83	5847.4	4109.59	4954.34	5534.18	4491.6	3118.21	4333.28	3589.32	2907.66	3896.57	3201	4342.07	3957.84	2863.2	3704.03	5471.71	4799.27	4161.82	3658.37	3821.8	3506.19	3777.59	4054.28	4197.66	4203.81	4369.72	3217.98	4104.3	3973.8	3213.29	4989.33	4105.49	3460.28	4219	3546.31	4245.63	3693.19	2583.01	4329.78	4446.36	4282.67	3600.42
M225.98694T0.74	225.987	0.735325	-	-		16136.1	12637.4	12327.5	12973.1	11262.3	11737.4	15250	12507.2	13419	12986.3	11322.4	13061.7	12596.2	12417.8	17116.4	15573.9	14430.8	12839.7	14026.5	12529.5	11981.8	15538.3	12789.3	12838.4	15682.4	16460.4	12215.4	14159.2	18545.9	13330.7	12429.4	13346	12073.6	13132.5	10727	15671.8	15397.7	12387.6	12742.9	9879.54	12316.2	16493.3	12656.4	14455.5
M226.08632T1	226.086	1.00072	-	-	[M+2H]2+ 450.159	8546.34	6829.09	9019.33	5750.73	8681.46	8044.25	10271.7	9323.35	8131.83	4405.51	5199.87	5510.68	8865.05	6236.18	8131.8	7746.02	6913.82	5946.62	8361.7	8726.45	10085.7	7783.19	6162.22	7213.32	8648.65	8973.46	8090.65	5082.66	5316.37	8543.41	5284.55	6336.6	12594.6	7707.65	9260.38	10650.8	13386.3	11278	12482.7	6348.44	12729.9	13136.8	10723.7	9880.1
M226.10542T1.08	226.105	1.07649	-	-		2746.74	2105.16	3821.37	2672.48	1974.61	2467.19	4177.81	2168.39	2800.99	3042.14	2448.79	2110.43	3685.93	2882.84	2661.94	3632.69	3193.1	1838.42	1748.96	3586.85	2799.33	3441.73	2017.16	1070.73	5222.99	3076.73	2103.91	2189.66	3335.93	2606.93	3321.83	3238.26	2932.4	1410.18	3604.46	3640.89	2199.87	3402.79	3906.03	2752.3	2684.47	4112.84	3711.55	3661.82
M226.18012T18.87	226.18	18.8699	-	-		4927.93	23367.1	13827.4	30118.6	31148.3	29313	14644	23896.3	17092.1	60728.3	38249.9	25757.6	7606.72	24060.4	33074.4	13903.9	14348.7	18230.4	11087.4	9071.09	48734.8	9861.11	41753.6	64767.8	13909.2	7618.5	41159.5	50842.8	70741.8	24679.7	31611.4	-4565	27442	76216.5	37900.8	29199	29552.6	20572.3	14707.5	58235	25797.3	46971.9	57259.7	31577.6
M226.18013T18.68	226.18	18.6832	-	-	[M+H-H20]+ 243.185	3337.91	34140.2	16632.8	46123	42415.7	25714	18256.6	26290	16077.3	80851.8	56601.3	19477.8	7496.22	28156	44724.5	8654.89	9372.86	20102	13388	10608.3	49047	10441.8	45138.4	90561.9	15193.2	9279.99	65546.9	78330.1	107684	34899.5	45794	-6172.41	38060.9	109811	54321	32884.7	49176	27612.2	21297.6	66603	25235.1	62861	69282.8	33353.5
M226.95144T0.83	226.951	0.830222	-	-	[M+Na]+ 203.961	1.53893e+06	1.53798e+06	1.56512e+06	1.6252e+06	1.61413e+06	1.57125e+06	1.42129e+06	1.49781e+06	1.5058e+06	1.5209e+06	1.53922e+06	1.57009e+06	1.47045e+06	1.39386e+06	1.50246e+06	1.6296e+06	1.63039e+06	1.60527e+06	1.59772e+06	1.45051e+06	1.48589e+06	1.45188e+06	1.53678e+06	1.52626e+06	1.45307e+06	1.46504e+06	1.52653e+06	1.5719e+06	1.60472e+06	1.66255e+06	1.58432e+06	1.45876e+06	1.6122e+06	1.62791e+06	1.54479e+06	1.4982e+06	1.38624e+06	1.33923e+06	1.6022e+06	1.47137e+06	1.67375e+06	1.63297e+06	1.46779e+06	1.45663e+06
M227.08154T8.56	227.082	8.55871	-	-		356403	461527	366165	171264	395801	461993	323670	369852	273153	346497	229836	325957	279936	285541	287287	375044	343980	465252	370824	328163	512037	409852	394604	266055	292297	363368	417300	344400	369136	387639	405233	343905	380767	385375	331464	390894	410955	366684	275496	295111	344595	388571	355740	398825
M227.95493T0.83	227.955	0.830063	-	-		49561.1	53213	46857.6	52797.9	52408.6	49658.4	46536.9	49606.1	49396.7	48403.6	51948.7	52514.8	44844.6	49938.3	46967.7	50437.4	52793.7	48064.5	51805.9	49667.9	52706.7	47681.5	51742.7	47778.9	46752.7	49882.7	46834.1	51781.7	47492.7	54763.9	51365.5	46459.7	56497.6	49395.5	53575.4	55605.8	49648.5	46913.5	53404.6	47229.9	55038.2	57901.9	49754.4	53973
M228.08475T8.56	228.085	8.55845	-	-		55593.2	65529.7	56167.6	21890.2	54731.3	65092.1	47080.7	48817.9	39351.5	46253.6	29861.8	38991.3	34609.3	39008	39286.5	50780.9	41072.8	56158.7	40896.3	43160.9	65035.7	54604.8	53501	36949.9	35174.9	48794.8	58194.8	46878.7	47534.5	50118.5	54003.9	48277.8	50332.9	52845.4	48376.3	49970	60629.8	47303.9	40887.3	40277.6	46948	51634.7	49408.7	56111.2
M228.19582T18.87	228.196	18.8701	-	-		4266.1	16480	11815.9	21681.1	21920.2	22038.7	10921.7	16675.1	10259.3	35290.9	30651.5	18106.2	5414	12820.3	26194.9	12370.8	10035.2	14676.5	8632.15	8120.01	31839	8395.92	22271.7	43820.7	8920.31	7037.42	22425.4	37205.1	36383.8	15631.2	19813.2	-1469.12	19888.8	41227.1	22434.6	15540.1	17223.1	14555.6	11210.9	31968.7	13372.5	22689	28461.8	18112.5
M228.9332T0.74	228.933	0.735108	-	-	[M+H-CO2]+ 271.919	5110.63	4167.34	4074.48	3870.43	5209.43	5850.17	5191.8	4625.77	4720.41	4956.19	5356.12	4935.97	4722.92	3901.63	4290.47	4135.57	3447.01	3926.38	4534.71	4544.71	4208.23	5338.24	4541.36	4417.97	3290	3120.08	4172.05	2901.75	4067.65	3806.86	3501.86	3319.61	4680.89	4980.46	5484.6	4869.05	3900.08	4663.18	4674.22	2837.73	3505.32	3135.4	3830.64	3706.14
M228.9558T0.83	228.956	0.8308	-	-		19408.5	17596.4	19359.8	18707.5	20186.7	18093.2	19904.6	18045.4	18434	19061.1	19893.5	19436.3	18326.1	19905.2	17497.6	18770.7	19289.7	20198.3	17956	20272	19670.2	19629.3	21167.9	20805.5	18917.6	17245.5	19501.6	19710	19041.6	19502.9	19792	16924.6	18224.3	19454.1	19673.3	18877.9	18829.2	16531.7	21452.9	18220.4	18248	19215.6	18541.7	19554.4
M229.08739T8.56	229.087	8.55774	-	-		6457.31	8027.99	5850.87	2759.33	5251.61	7139.58	5414.49	4596.45	4519.85	5471.1	3611.61	3835.98	4135.67	4586.91	4285.13	5396.78	5161.16	7347.73	5955.4	4542.72	7083.03	5983.45	6216.77	4070.24	4531.59	6127.52	5500	5442.06	5908.4	6888.28	6011.91	4745.41	6513.71	5765.97	5936.76	6091.06	6694.8	5604.65	3432.98	4031.91	5247.13	5350.54	5443.69	6570.66
M229.11834T1.16	229.118	1.16471	-	-		126503	335985	251535	153976	197634	269320	225936	222318	231182	202778	97304.9	251733	212224	273422	197403	174476	214361	337796	227761	354628	303426	324472	166113	117452	209042	159517	245014	116832	283844	247816	162832	245660	121173	182882	183058	245220	211140	302747	214767	221135	178758	263821	321900	208689
M229.15467T1.21	229.155	1.21212	-	-		104085	100905	91702.7	71561.2	83167	89868.7	124120	102064	111833	110374	96495	122243	93752.9	103617	95511.1	94554.9	119247	96364.1	92467.2	95836.1	128810	122919	103275	84466.6	124325	104353	122714	100665	103413	122177	103982	147128	134739	128628	111520	130488	87960.5	111151	103738	103994	86859.7	111896	93558.1	117200
M231.09755T1.19	231.098	1.18554	-	-		9532.59	11434.5	13463.2	11342.9	10252.5	10332.5	13216.1	10642.5	17082.3	9818.77	6781.6	10074.5	9668.27	9648.07	10081.8	11053.5	11748.7	10897.2	10735.2	11592.2	11623.4	11695.4	9689.36	8967.39	8607.14	9872.91	11098.8	9075.87	6025.87	9354.85	8114.54	11404.2	8241.36	9418.39	7430.38	9788.33	10623.7	12408.6	7218.77	6969.85	8664.24	9639.98	10355	8756.9
M232.11805T8.11	232.118	8.10502	-	-		4078.16	3245.99	2868.38	2066.45	3374.82	2546.8	2160.16	2546.66	2011.18	2501.93	2160.14	3248.29	2263.71	2484.9	2775.15	3100.8	2425.9	1969.97	2118.6	2275.4	2750.6	2676.61	3190.53	2541.84	1896.92	3407.02	2727.99	3141.65	4625.22	2603.35	2855.55	2239.8	2578.01	4391.05	5019.86	4182.41	3649.94	2943.69	2776.92	2168.81	3887.18	2544.41	2460.18	3581.52
M232.15439T7.02	232.154	7.02297	-	-		11381.1	8093.66	18177.3	7792.89	13618.3	9630.54	10144.4	11612.3	10316.7	10786.9	6974.61	12180	7747.21	12654.4	9574.83	11620.6	10277	20967.3	5601.83	11611.5	14400.4	9626.43	11638.9	10495.4	9036.09	9956.85	10583.5	14866.6	12237.3	9132.88	12690.1	10428.2	12008.7	10691.1	13338.4	12891.5	10664.1	10961	21018.9	11887.1	9141.05	9907.07	11786.8	11148.1
M232.92822T0.74	232.928	0.736865	-	-		118930	126430	130968	112486	120912	129568	128151	111436	127400	119185	120875	119010	119990	113569	107906	113848	112096	121973	119917	122740	114326	115193	124474	108509	105926	111505	139680	113021	119749	126986	116151	105108	135019	132098	119223	126559	117972	127400	127536	99340.8	132475	118090	114284	126439
M233.9316T0.74	233.932	0.735857	-	-		4854.07	4309.74	4648.07	4775.78	4714.06	4372.7	4049.72	4026.09	4328.67	4095.93	3665.9	3327.72	4404.65	5326.54	4084.66	3616.08	3929.87	4678.18	3960.07	4535.01	3810.98	3613.27	4412.76	3865.85	3418.65	3993.05	5558	3808.64	3587.89	3999.85	4480.04	4161.87	4022.67	5071.99	4808.91	3861.36	3872.34	4833.18	4398.72	3924.02	4542.26	3837.32	5355.03	5136.71
M234.9415T0.88	234.941	0.880895	-	-		91129.4	99539.1	68311.1	78749.1	107125	104577	78000.8	65880.7	118414	87148.5	74429.4	66893.7	93577.4	104785	89093.7	95035.6	103056	66884	87831.6	63473.8	88404.9	100418	67185.9	78180	89729.5	84891.8	89735	58675.3	54826	91506.2	49455.9	79840.9	98024.6	79534	83143.9	62669	84068.2	105932	81058.7	60157.3	79124	89158.8	107257	82520.2
M234.96155T0.74_1	234.962	0.737912	-	-		15782.9	14028.4	18564	13975.4	15242.8	15147	17805.8	17066.7	16667.3	18150	16141.2	15237	14732.7	14211.9	13889.8	15759.4	16177.4	13499	14900.4	12242.5	12833.5	14547.9	13659.3	14949.7	14579.3	16930.3	16212.4	17560.2	17359.9	17372.5	14970.7	13129.5	16301.5	14852.3	13340.7	15993.9	19160.8	18016.7	19859.5	14794.7	16771.5	18276	17682	17904.9
M235.09247T1.06	235.092	1.06178	-	-		133123	120281	103966	124045	150367	130677	112886	143043	119905	128761	119812	120055	137518	130537	153519	130332	122513	117100	118948	136567	133011	119791	120249	127698	131308	126869	128357	123742	129212	132740	137520	121830	132550	131611	134450	128773	134239	128109	132378	140856	124326	118869	129887	118502
M235.19026T12.13	235.19	12.1319	-	-		5967.6	4878.2	2352.68	4390.87	3817.82	3977.34	2854.33	2877.24	2346.57	4993.42	2920.49	5138.9	4959.92	5421.47	2971.27	2646.99	4222.48	4394.31	5442.95	3647.04	2899.87	5782.31	2537.11	5321.9	2508.76	5180.91	2260.18	2698.54	2536.73	3507.38	3912.52	5402.09	3723.79	5911.76	5170.98	2030.79	2537.4	2968.98	5252.79	5849.61	1662.98	5486.86	3201.43	4251.98
M236.09571T1.06	236.096	1.05586	-	-	[M+Na+NaCOOH]+ 145.113	14042.2	13200.4	15354.8	12041.9	13488.3	12363.9	11200.5	14483.2	12842	13219.2	11987.9	12929.8	14296.5	13733.4	14803.2	14951.5	12280.8	13228.2	11871.7	11671.1	12983.3	15497.2	13842.8	15037.9	14937.1	13690.9	14267.4	13934.6	13467.5	13052.2	15448.8	13051.6	12041.4	13143.8	14938.6	12750.1	12956.9	11810.2	15543.1	14563	12816	12146.3	14556.8	12086.4
M236.09578T1.63	236.096	1.62976	-	-		4107.01	4329.78	4188.61	3659.81	3820.98	5512.5	4812.21	3833.65	4281.38	4327.92	4588.95	5171.93	5409.84	4818.28	5091.88	5090.79	4750.03	4660.46	4274.7	4761.9	4873.24	4720.96	4141.6	4329.66	5010.07	5985.71	4227.82	4451.97	4787.99	4813.3	4460.13	4014.88	3862.04	5057.59	4393.85	4885.19	4602.09	4838.67	5304.97	4104.83	4508.88	5639.04	4156.34	4886.68
M237.08714T7.8	237.087	7.80256	-	-		788.57	5938.73	5709.79	3350.92	5734.86	4188.16	4203.3	4577.79	6136.12	4241.59	9638.55	5159.08	2054.3	5071.94	4757.72	2856.04	3779.66	4738.06	3554.84	3819.69	2855.29	3051.34	2774.42	2095.24	3162.96	4483.03	3863.33	4635.82	4883.7	5542.78	1548.7	3098.46	4051.92	2757.79	3903.94	6101.45	4130.89	4047.57	5606.53	3039.88	5371.76	4118.25	3807.11	2652.72
M237.0871T6.6	237.087	6.60388	-	-		6520.78	4558.6	7677.41	4713.46	5414.94	4916.47	6826.96	4379.77	3303.55	4668.32	3746.6	5197.71	3508.03	5187.28	2880.36	3436.03	5994.44	5149.45	4889.88	5249.77	4451.99	3197.38	7980.5	3435.42	3681.06	3197.72	5466.42	5407.72	6753.55	2874.33	5173.65	5863.3	5597.54	4655.49	4524.9	6122.88	4779.86	5330.31	6937.48	3415.25	9116.73	5708.37	4738.65	4195.18
M239.96658T0.74	239.967	0.735857	-	-	[3M+K]+ 67.01 [M+K+CF3COOH]+ 67.01	207026	192512	201701	177438	182318	203245	217793	182599	207016	191294	182723	201210	190494	194410	225511	211571	206307	194144	206477	190660	202228	211255	190990	217413	224249	232562	209492	199735	220596	197016	186292	167009	187177	192086	177181	221449	207706	187433	208906	160835	211397	229168	193091	213834
M240.09787T8.39	240.098	8.389	-	-	[2M+H]+ 119.555	8372.32	11410.7	10903.7	6815.45	6886.71	9838.37	8830.82	11247	9197.35	8735.35	9638.6	7604.05	6447.99	9780.32	8023.34	7498.16	11501.1	11849.6	8295.5	8113.5	8105.11	9991.12	7947.07	6032.36	7526.39	8609.41	9894.47	10242.4	10326.8	11679.9	10787.8	9512.83	8751.53	8457.12	10017.5	12106.5	9735.63	10767.7	9119.51	8170.68	11178.4	10422.4	8362.82	10332.2
M241.01405T10.11	241.014	10.1083	-	-	[M+H]+ 240.003	1801.87	5362.83	3338.44	1718.49	3126.54	1783.76	2642.86	1780.37	3445.83	2248.03	4444.31	1738.84	1441.82	2047.12	2366.51	1803.26	1497.86	2821.09	1002.32	1961.92	1214.84	1645.55	1198.84	454.229	1606.47	2002.65	1789.99	2682.39	1304.95	1098.6	1588.66	2973.7	1844.12	1898.92	1762.13	2448.95	2114.07	1520.16	3152.86	640.029	1926.89	1922.9	1645.08	1990.45
M241.96441T0.74_1	241.964	0.736869	-	-		35400.9	28921.5	34526.4	28614.8	27970.1	30978.1	35387.9	27078.1	31453.5	31605.9	30526	32905.1	30504	34099.9	37620.1	37283.4	36052.4	33379	34834.2	31840	31104.9	32692.2	33837.5	37176.1	37325.3	36450.1	36381.5	32868.7	35941	30149.6	30880.8	27137.2	33754.8	32170.6	30365.2	36308.9	34402.8	30795.6	35952.8	27106.2	31768.7	37904.1	29521.1	30985.9
M241.99972T0.74_2	242	0.735325	-	-	[3M+2K-H]+ 55.026	33427	25262.6	32568.8	23930.6	26755.5	29898.4	32357.9	28082.5	30090.2	32150.1	31495.4	31904.2	25929.7	29588	31143.9	32344.4	34773.5	25693.6	29573.7	23474	28378.2	30662.2	24280.3	33935.3	32137.7	39888.8	32514.1	36256.6	46627.1	29476.1	23712.7	31732.9	33294.1	24879.9	26302.5	36272.4	38253	31331.1	34277.5	25553.9	35033.5	39874.4	32092.4	34654
M242.99947T0.74_2	242.999	0.735174	-	-	[M+H+NH3]+ 224.966	12793.6	10570.7	11782	10560.5	9767.18	11689.5	13142.7	10579	12244.1	13954.1	10894.7	11169.3	10847.1	11262.8	13706.4	13361.7	11199	10355.8	10049.4	9357.32	11426.8	11950.3	9529.99	11602.6	14940	14691.7	11100.6	12548.7	14462.3	9933.34	10564.3	12211.2	10624.3	10846.7	9021.38	12394.1	13101.6	11435.7	12140.2	8939.13	10513.5	13170.4	12088.5	14587.2
M243.13386T8.56	243.134	8.55593	-	-		3786.71	7575.48	6232.23	9093.13	8240.64	3363.02	4306.62	7903.75	5177.08	7160.42	10577.6	5114.64	5696.59	5931.75	6633.72	6251.79	6276.95	8989.65	5067.84	5086.61	7856.24	6804.68	6448.79	4953.02	7252.41	5301.25	3199.17	4825.02	6305.85	8205.19	4767.92	6048.25	8390.52	6766.35	5092.6	6931.73	6091.05	5490.57	8783.79	5536.41	6670.53	4190.28	4770.4	3938.27
M243.92882T0.83	243.929	0.83498	-	-		23730.9	24750.9	25457	27405.2	28727.5	26859.6	28224.6	25376.7	26986	25435.5	26849.7	23953.8	25945.6	24896.1	21078.1	23642.6	23118.6	22514.9	21332.4	25323.9	27441.2	23258.1	22478.8	22820.2	21591.6	24033	22751.7	22530.6	19831.2	20611.4	22542.1	23559.3	22919.3	23286.1	24566.8	24456.8	23916	27555.6	23812.2	25118.6	23290.8	24545.3	25862.4	25408.7
M243.95963T0.74_1	243.96	0.73696	-	-	[M+Na]+ 220.972	5086.33	4381.66	5090.35	3891.5	3753.54	10334.3	5975.8	5619.97	11930.1	10699.6	4710.61	6011.88	5998.38	6097.52	6322.83	6253.05	6214.31	7296.59	12421.4	6949.39	5965.5	13749.6	9872.81	6408.26	6064.07	8528.28	12083.2	8705.06	8896.96	4959.12	13585.6	12905.3	15442.8	8414.94	4685.85	16521.3	18168.6	5158.52	8391.13	6249.94	7566.94	9020.07	7403.24	14696.1
M243.99747T0.74_2	243.997	0.735796	-	-	[3M+2H]2+ 161.995	12367.6	11310.9	10976.4	9736.9	10449.9	11925.5	12230.9	13999	11760.2	11800.2	12178.8	10658.9	11043.1	11119.7	11953.5	12293.5	10859	10152.1	10738.5	10270.1	9749.54	11095.7	9570.99	10003.7	10824.1	12985.3	10010.6	9672.94	11945.8	13546	9143.48	10392.9	10106.7	9183.7	9760.39	12456.4	12743.8	9968.97	12486.6	7347.37	10880.1	14025.5	11009.4	10459.9
M244.19074T18.87	244.191	18.8705	-	-		3297.73	10397.7	6681.56	18338.9	14060.9	16538.7	7681.42	12419.3	8203.75	28655.6	21290.7	15137.8	5442.96	11996	18687.2	9389.09	7842.93	10583	7140.9	6264.32	30529.2	4987.33	23042.3	38133.7	8818.79	4843.09	22934.2	30787.9	41118.9	14272.3	15171.1	-436.185	15732.3	42025.3	19045.9	12824	16169.4	12709.2	8182.1	28864.2	13676	24912.3	30015.3	19487.1
M244.63797T12.92	244.638	12.9153	-	-		4199.96	5194.53	3529.2	1780.1	4571.78	3747.14	2205.26	3556	2447.64	6243.11	3633.09	4770.95	2634.7	3085.08	2825.57	5344.1	4048.06	8021.56	4003.25	4139.73	10502.9	9423.37	7810.06	6741.11	10163.9	4955.45	2969.85	8174.35	7460.83	5864.18	5441.72	4529.72	6247.98	5849.58	6116.5	3755.65	7172.36	5905.85	6384.72	3561.08	4670.81	8503.59	6025.81	7006.09
M244.66337T7.35	244.663	7.35316	-	-		6783.56	10700.5	9173.28	25942.3	9316.04	24346.7	9838.01	11687.9	5179.97	1464.15	5744	7786.02	8504.7	9798.8	12556.4	14495	11015.3	3952.48	5775.16	9615.82	4058.97	10674.5	9357.27	8049.26	2728.93	9497.18	3636.79	12304.2	4241.95	8164.88	5867.66	22443.4	10910.8	9509.25	12659.1	11971.3	8556.14	10302.3	6332.15	4849.2	10225.1	9284.88	9952.62	9385.42
M245.14956T1.21_2	245.15	1.21221	-	-	[M+K]+ 206.189 [M+Na]+ 222.163	58637.7	53404.7	55101.7	39933.1	37051.6	58866	59983.4	82964.4	67270.9	53982.7	36763.6	60292.4	53149.9	68977.8	62536.4	45264.2	67747.3	75430.2	57252.9	66637.6	63080.1	69649.3	64699.8	48625.7	80747.2	62018	67294.9	66141.4	99705.6	81276	64745.9	65833.6	54605.2	68861.6	69370.8	80340.6	66315.7	76318.8	61903.9	73615.7	61999.4	62544.5	51282.7	70906.5
M245.18601T8.35	245.186	8.35113	-	-		21586.4	21242.5	21788.9	56540.1	22601.6	25239.7	20889	21951.7	20226.2	19798.8	21276.8	6537.31	22499.8	23828.2	22073.2	25729.9	38270.3	-5049.36	20934	20870.8	20939	22888.5	22212.4	22233.6	16706.3	24365.7	-2798.77	22334.9	20799.9	21597.3	21068.1	25688.1	22503.3	21658.3	6187.42	24832	57881.2	22087.4	22224.7	20763.6	20909.1	22143.8	23528.8	21700.2
M245.18609T8.17	245.186	8.17218	-	-	[M+H]+ 244.184	27809.1	27135.6	26733.6	79019.5	27480.3	47769.4	28771.7	27818.6	27289	20079.2	26592.4	34279.6	28087.6	27243.4	27307.9	27088	45674.8	15900.9	26840	26618	26835	26488.7	26492.1	27444.2	-278.846	26932.7	155.114	28093.2	27620.7	28865.4	27237.8	27287.9	27846.7	28514.2	33420.7	28761.1	12605.7	29011.7	28176.9	27183.7	27830.7	28405.3	28450	25818.6
M246.14475T9.18_1	246.145	9.17511	-	-		12252.5	13874	16993.1	7191.33	11497.9	11422	14027.6	12960.3	7496.07	12970.1	8841.14	11244.7	7575.09	15588.7	13080.8	7222.84	11380.3	19785	10637.2	13625.4	14910.8	6874.39	9092.01	-917.327	7009.88	14005.1	9009.68	12423.6	10404.7	14365.9	15981.8	13118.9	12662.6	7547.32	14860.8	15304.1	14966.6	14477.2	13491.8	12500.4	15125.6	13049.2	9438.75	13865.3
M246.17008T8.01	246.17	8.00941	-	-		36410.9	18387.8	33106.1	13798.8	29832.8	19492.3	19352.2	26950.2	23047.3	21898.1	10842.2	23305.8	17690	29780.8	24593.6	24912.7	24522.3	41580.3	10799.6	21041	24782.2	20303.9	22188.2	15480.3	12516	23694.4	15008.8	21295.3	30422.1	13883.7	29195.2	18324.7	18909.4	16329.4	24226.4	22511.1	16567.9	18070	19621	18140.8	23858.9	25467.1	19439.8	24720.3
M246.17008T9.19_2	246.17	9.18782	-	-	[M+H]+ 245.164	4044.07	10623.3	7206.92	2469.81	9005.43	11632.1	13924.5	10332	12628.6	2646.29	13271.6	11472.5	12474.3	4400.31	9809.14	9517.07	9129.92	10104.5	12194.7	5988.62	6694.63	3542.64	8701.94	4215.77	28084	11232.4	7212.26	18731.1	14486.7	11317.6	10080.3	1845.11	14540.5	8243.5	3606.25	9341.53	16412.8	10892.7	11203.3	4869.14	4043.98	12853.1	7914.15	14747.2
M247.0925T1.05	247.093	1.05116	-	-	[M+H-HCOOH]+ 292.091	91279.5	87500.7	88788.4	91109.2	87533.7	86561.2	87075.3	87004.9	86818.2	88313	85543.4	90261.5	88787.8	83029.3	85982.8	86150.9	84117.1	85644.1	86818.7	93021.3	79800.2	87164.7	86099.1	84782.7	81005.1	88882	82152	84479.1	81964.4	89836.5	88910.4	95175	89083.4	93577.7	92520.2	81582.3	97056.6	94966.9	87848.7	98898.1	91148.4	88748.7	97044	95377.3
M247.12195T12.92	247.122	12.9156	-	-	[M+2H-CO]2+ 520.235	20446	22830.6	16890	9207.9	18427.1	19483.5	10706.2	14032.1	10756.4	23071.6	16188.5	17700.9	17760.5	15738.3	15514.1	33828.8	22358	32292.7	15451.4	26175.5	38929.7	33504.2	34167.2	25430	34808.9	22639.4	13926.1	28928.9	27077.7	22506	23908.9	18730.3	26261.7	18139.2	22363.4	12958.3	21952.7	21632.2	24544.2	13911	15028.4	30561.9	16211.5	26616.9
M247.12893T1.51	247.129	1.50828	-	-		7657.79	9793.99	8976.53	3391.65	6656.34	7419.6	6745.03	6790.81	7764.8	7564.68	7063.32	8448.83	3675.47	7767.54	6715.53	6782.35	5306.31	6246.81	8483.48	6216.85	7529.13	7285.41	6403.62	9370.27	4634.36	7466.95	13999.9	6274.42	5687.69	5760.67	7521.32	6657.86	9967.8	7205.58	7264.7	11368.9	9130.47	9757.41	8501.4	5619.65	8394.98	6321.54	8241.65	7475.2
M247.12897T5.99	247.129	5.99263	-	-		10568.8	12283.4	11906.7	4707.94	9743.42	13242.2	10792.7	10372.1	10415	11045.6	8354.41	9733.93	8295.22	11199.1	9025.81	8576.98	7307.88	9569.69	9907.19	11272.5	10393	9053.89	9229.72	11423.7	6556.64	10539.9	16485.2	11356.7	10533.5	10372.3	8037.31	10905.8	10683.4	8823.63	9117.32	11052	16349.1	12216.2	11975.4	9208.93	10989.3	12454.9	13689.2	10723.9
M247.17337T8.01	247.173	8.00608	-	-		4094.35	2686.15	4703.15	1996.42	3787.94	2328.07	2876.8	3317.91	4308.45	3678.29	1122.92	2751.61	2756.29	3609.09	3752.68	3087.22	3618.6	5400.48	1362.41	3065.74	3795.5	3121.96	3334	2218.34	1800.56	3826.51	2497.09	3641.32	4992.15	2898.96	5951.06	2764.9	3882.47	3453.94	4920.67	4463.14	4251.2	2881.79	4036.64	2544.94	3581.03	3812.5	3523.12	3613.42
M247.62359T12.92_1	247.624	12.9152	-	-		6562.52	6109.83	4816.58	2679.11	4092.31	4343.92	3237.47	3082.58	2903.29	6498.63	4091.22	3875.71	3994.36	4393.67	2936.35	9576.26	5996.85	9273.18	4253.48	5482.44	11402.6	10587.1	9687.48	7416.93	10661.3	7494.94	4436.08	9355.6	9499.1	7379.5	7654.84	6817.54	8941.03	6149.47	7681.72	5220.75	9101.79	6783.56	6937.8	4646.86	4502.01	9503.77	5171.24	9324.63
M248.09663T1.06	248.097	1.05573	-	-		12878.3	11777.9	14504.3	11660	11987.4	13028.9	14159.7	12354.1	12921.9	11585	12025.2	13796.9	12375.5	12109.9	11483.9	12365.3	11047	14463.6	10979.5	12124.1	12576.4	12636.8	12237.7	11499.1	13344	10861.7	12252.7	12385.5	11967.4	11350.1	12288.6	13301.6	12331.8	10010.6	10671.1	11483.9	10373.2	12516.3	12775	13698	11512.1	11561.9	12341	10891.1
M248.12002T12.92_2	248.12	12.9155	-	-		9150.26	8288.56	6384.32	5400.69	7642.97	9437.39	5416.54	5326.37	4972.28	10456.7	7083.24	6666.82	8602.44	8457.52	6829.93	14031.2	8622.56	16731	7804.85	10272.7	19182	17266.7	16438.3	11893.9	16325.9	10379.6	6962.75	13095.6	12561	9440.23	11083.9	10456.2	11563.6	7709.92	9443.02	5717.46	8043.88	9542.77	10778.8	6624.42	5281.57	11041.6	6399.94	11211.2
M248.62111T12.92	248.621	12.9155	-	-		3682.6	3055.71	2631.8	1648.97	2972	2346.51	1712.23	1476.88	1374.91	3325.33	2874.23	2133.08	2810.13	2453.8	3591.08	5937.75	3867.61	5408.19	2861.39	3143.64	5786.23	4989.79	5167.92	3974.61	5692.46	4315.22	2427.49	3750.94	3710.09	3217.65	3052.85	2430.15	2783.58	2947.41	2323.9	1376.28	3834.88	3551.42	3313	1849.99	3263.87	4121.63	2479.97	3410.43
M249.00817T9.12	249.008	9.12285	-	-		5185.82	5602.24	5165.37	6217.57	5441.47	5972.36	6323.79	4542.37	5786.98	4951.85	5277.21	5837.32	5650.16	5723.94	5371.68	5771.23	5644.4	4260.45	5974.91	6259.21	6108.86	5258.3	5420.88	6481.62	6952.95	5897.58	7493.91	7389.66	7398.67	5024.28	7327.02	7310.77	6257.92	6445.08	6352	7041.97	7789.78	6753.5	6133.75	6949.07	6736.15	5995.25	5163.55	6111.83
M249.07578T8.98	249.076	8.98477	-	-		6130.54	9386.37	4892.05	7611.4	6584.81	6455.03	4288.76	6598.07	4574.97	5201.48	2978.53	6532.91	4339.78	6775.24	7153.57	7690.04	6887	7105.62	6388.07	4125.24	6001.93	10900.7	4954.05	3186.69	6321.1	9734.39	8815.28	6199.64	13133.8	8821.95	11962	10292.2	6166.03	6704.08	6610.82	9115.41	7662.63	8915.81	6877.64	4011.53	8089.89	6355.69	5496.39	8156.51
M249.10808T1.02	249.108	1.0247	-	-	[M+H-CO2]+ 292.091	273779	257782	276304	280598	245963	262037	283708	246652	267002	258532	255707	279035	263455	247352	263150	241151	250292	261012	263491	264699	263901	277285	258333	241065	124823	275652	252204	256505	258118	290560	275637	265894	280857	277769	294470	257976	311625	298736	272974	249725	239408	241209	295882	284275
M249.99232T11.15	249.992	11.151	-	-	[M+H-H20]+ 266.997	5645.22	5381.69	5470.61	2802.87	6728.59	4968	7090.5	6070.79	5823.76	6953.39	7747.73	6116.99	6284.63	5049.33	7990.48	6903.79	6911.18	7013.2	6421.52	5888.77	5894.32	4503.88	5260.31	6595.45	4807.42	6513.43	7661.36	6536.54	5356.8	4898.44	6419.36	5374.86	6365.1	5271.25	5307.62	7154.65	6373.92	4274.38	7127.65	5526.49	5289.78	5096.47	4915.78	5270.06
M250.11137T1.02	250.111	1.02196	-	-		31105.5	29738.6	30980	30148.7	29183.4	29413.3	30542.9	27590.5	29727	32579.3	28457.2	30402.1	30965.3	27103	28999.8	28672.6	24223.5	30599	29559	29241.1	28888.4	32414.2	29082.7	26097.6	17047.6	34578.9	28306.6	28901.8	29799.7	35401.3	30537.9	27447.4	28172.6	33989.9	29426.9	29703	35236.5	34143.3	29925.3	28624.3	25569.2	27808.6	35326.2	32290.3
M250.21648T13.96	250.216	13.9634	-	-		5625.17	6159.65	7024.91	7310.4	9334.46	6965.04	11152.1	11910.6	9489.84	5834.42	4198.54	3700.64	5644.53	7300.8	7863.63	12958	10993.1	9456.52	11006.9	5366.42	3899.44	3704.41	7395.96	8259.35	6691.64	7650.27	7700.97	9800.5	10736.6	8222.34	4729.93	5309.46	6073.57	6591.6	8841.87	10101.2	11413.5	11514.5	10299.8	8342.77	1770.02	3597.08	5301.66	5312.54
M250.93925T0.74	250.939	0.74187	-	-	[2M+2Na-H]+ 102.993 [2M+2Na-H]+ 102.993	29175.6	31814.8	33419.4	26573.3	31368.6	32600.8	32349	31541.6	29744.1	32485.7	28474	29025.6	25929.5	26973.6	24335	27940	26086.3	27086.9	31817.1	26478.4	25399.8	27443	27877.7	23583.7	26137.8	25219.6	30841.2	27124.2	30573.7	28560.8	27503.3	29994.1	30050.5	31495.3	28068.5	29240.7	28416.4	29676.6	28588.3	26698.3	30318.1	31552.1	28293.5	29688.6
M251.10274T8.03	251.103	8.02917	-	-		183.67	14632.6	17596.7	8413.12	14504.4	10872.3	10633.7	12111	38652.6	11428.1	23393.3	9955.81	5614.93	11958.4	9637.59	8344.92	11430.1	10403.7	5414.13	10457.3	632.505	8046.69	7801.63	5380.11	8889.7	11534.3	10840.6	11446.1	7912.93	10275.7	-3389.17	9890.25	11986.1	8708.55	10877.3	15989.6	11183.4	9261.09	22662	13748.8	11890	10241	8868.07	9792.16
M251.11275T11.81	251.113	11.8084	-	-	[M+2H-H20]2+ 518.222	9384.75	13318.5	4464.32	6798.91	8649.61	7290.07	1857.51	8275.45	9121.88	13431.3	6086.25	7263.68	7503.66	3620.7	7031.23	13429.3	5363.31	8362.36	8853.91	6555.22	11506.1	11420.4	11897.6	5519.35	9414.37	12627.1	4966.95	10766.6	6491.42	11222.3	5344.22	3727.65	8419.53	9138.88	14592.5	11420.8	14729.1	10795.7	11755.5	9036.64	9171.17	16403.1	18237.8	14884.4
M251.11299T1.03	251.113	1.0259	-	-		5810.49	4651.91	6261.86	5506.65	5967.54	6974.58	5633.34	4135.68	6076.87	6667.24	5282.44	5008.17	5911.47	5223.78	6691.55	6392.97	7583.29	5775.42	6343.87	6927.34	5652.36	5011.23	5450.28	3686.58	1754.48	4981.04	5397.03	5114.43	5739.14	5944.89	5201.35	5208.08	4609.79	5350.57	4754.95	5506.05	4738.33	5463.59	5746.25	4629.17	5236.83	4333.61	6023.15	4214.64
M253.14333T12.1	253.143	12.0971	-	-	[M+K]+ 214.186 [M+Na]+ 230.16	5379.77	3843.93	4445.14	2819.98	3550.68	4050.7	3938.51	4526.92	3633.8	3652.22	3364.69	3238.47	2453.71	1921.26	3462.49	4022.93	4093.66	3358.01	4315.75	3050.92	4482.18	3310.16	3451.97	2778.7	5857.16	3565.68	3949.46	5392.47	4512.79	5132.32	4494.76	2959.5	5480.64	4395.19	3576.66	5178.25	4186.11	3334.85	4163.52	2363.9	3830.7	5394.98	3003.74	4296.53
M253.98208T0.73	253.982	0.734622	-	-	[M+Na]+ 230.995	2704.55	2539.22	2707.95	1906.34	2845.95	2530.07	1914.73	1992.53	1944.53	1694	1540.96	2224.8	1707.63	1885.55	1308.23	2598.22	1963.94	2397.17	2031.24	1390.62	1611.58	2014.8	2541.61	2434.42	2623.81	1899.67	2800.04	2650.68	2631.64	2170.19	2701.31	2397.76	3036.86	2375.96	2674.82	1715.81	2126.08	2533.19	2462.87	2107.04	2124.17	1875.57	2312.75	1958.25
M254.24793T16.91	254.248	16.9068	-	-		7089.36	7158.56	11657.3	9412.46	13884.3	17229.6	24796.6	17558.2	9577.87	6766.36	18597.4	21340.2	18195	4012.55	22541.8	10539.2	15739.3	14701.2	14213.1	7509.26	18680.6	3093.37	5385.92	5639.93	4969	16413.6	11707.5	7704.35	12355	10939.3	7470.92	5298.87	11190.3	3026.75	4402.75	664.695	10196	9903.82	13133.2	8808.06	9083.91	6165.77	16732.4	21383.6
M255.2108T18.2	255.211	18.2027	-	-	[3M+K]+ 72.0918	5738.72	3312.26	6863.22	2197.36	6837.89	6956.7	4911.75	8075.71	8441.87	5904.89	3950.22	4612.93	4930.27	4000.7	4209.89	3451.21	3308.44	4335.28	5675.14	4920.49	6207.1	5660.57	5029.52	5621.81	6621	3978.93	5900.83	5232.2	7003.86	5263.78	4580.7	1941.13	3973.12	7842.6	5336.2	4051.28	4445.04	4171.09	4104.66	4095.43	5287.05	5820.28	2413.14	5007.32
M255.94407T0.74	255.944	0.736395	-	-	[M+H+HCOOH]+ 208.93 [M+H]+ 254.934	221837	238005	234738	223858	231219	249000	239604	198167	234605	216320	209713	213779	219296	226333	213679	221037	217916	225896	228965	230480	238180	225688	246471	222861	209257	204834	232299	198188	198288	234150	205360	165958	222776	232746	224936	221928	200798	212238	216227	180015	231531	211064	203893	221675
M256.12718T12.92	256.127	12.9152	-	-	[M+2H-CH4]2+ 526.274	6278.04	5623.18	4930.24	2940.97	6492.64	5774.77	5158.56	4164.49	3139.12	5509.17	4709.23	3759.56	4056.51	4957.71	4231.59	9549.03	6715.08	9915.72	5936.68	7343.74	9674.02	9358.85	9946.7	6045.16	10917.6	5333.83	4252.11	8062.15	6322.66	6015.71	6612.03	6027.2	7094.21	6428.15	6036.87	3107	5213.6	6572.52	6593.96	4433.86	3625.81	8991.53	3729.67	8389.41
M256.94727T0.74	256.947	0.736872	-	-		13641.4	12342.1	14896.1	13759.6	13361.9	13291.9	13665.7	12528.7	14682.7	12618.3	13341.9	12186.8	13335	14258.9	13674.3	12257.2	14263.1	12114.3	14255.1	12578.3	13061	14277.3	14158.5	14947.6	12956.4	12934.2	16081.9	10196.7	12233	13044.1	12766.4	10864.6	13773.4	14740.3	14469.4	12550.1	13212.1	12895.6	12408.7	10002.6	15086.3	11715.3	12035.7	12889.6
M257.97721T0.74	257.977	0.735675	-	-	[M+Na]+ 234.99	91849.3	83116.7	101803	77507	86117.7	94295.4	100559	87685.5	92812.7	106238	94298.5	88831	89350.2	92338.6	104380	100179	102795	89023.8	111378	88518	85863	88914.6	84970.1	83199.7	96245.6	100915	96349.6	93789.5	111523	94461.5	87410.3	83074.3	92307.1	96674	88787.4	101192	104012	94800	92744.4	77816.4	91845.9	105986	87404.8	91796.6
M258.10915T1.2	258.109	1.20479	-	-	[M+H]+ 257.098	12111.7	10731.4	10814.9	11890.8	10092.7	9021.63	10374.8	8994.17	9372.67	12181.8	10798.4	11628.5	12430.5	9826.47	10180.6	12034.6	11010.1	12177.1	11936.5	10628.3	9635.78	10752.8	13819.9	9573.78	11403.5	11146	9154.44	10252.2	8144.12	9583.16	13670.1	8189.04	9556.39	10253.5	8470.83	11687.9	9171.26	8918.3	8477.78	9229	12285.4	12717.1	12319.2	10415.9
M258.11024T0.9	258.11	0.8997	-	-	[M+Na]+ 235.116	75458.9	88782.7	97990.7	12328.6	84710.9	67696.4	90255.5	76013	77205.2	83220.9	81754.5	99296.9	75581.9	82357.6	84320.1	76823	12405	89242.3	81481.3	86949	74098.5	84053.9	73848.3	68811.3	120569	70825.1	129776	69400	72795.9	75171.5	76323.7	58680.3	84840.4	70251.1	62129.4	73569.2	72520.9	91420.8	75700.8	86177.5	64016.2	70781.8	80667.1	81565.1
M258.1337T9.34	258.134	9.3408	-	-	[M+H]+ 257.126	85257.3	343673	307187	140407	285082	221407	212431	208417	200067	230063	291572	183601	33841.3	280598	127601	120380	187934	205397	217674	165137	142716	91977.4	215830	763.235	141169	226618	144317	247735	270724	211459	121098	151055	203867	123362	208247	316856	215451	207006	150093	145356	178342	119525	138307	220967
M258.97737T0.74	258.977	0.735918	-	-		20054	18195.7	20614.9	19901	18342.2	21816.2	20743.8	21487.5	21172.1	22893.1	20173.7	20554	21304.1	18886.1	22571.3	23400	23577.5	19474.7	23599.3	17913.1	20500.5	18211.9	20301.2	21864.2	18724.8	21708.4	17687.3	22689.1	21429.2	19034.8	17579.4	16052.8	18415.1	17019.1	15985	20387.9	22682.5	17084.2	19843.3	15986	19436.3	23497.6	20178	19033.3
M259.09261T1.16	259.093	1.16488	-	-		9052.39	8424.92	9870.62	1496.79	8758.67	6499.95	7059.58	11620.7	8891.28	11064.7	6665.35	9218.55	4587.65	5584.82	5710.65	7117.11	4688.47	7611.1	5932.39	6012.92	6502.08	7333.93	6590.72	6937.06	7316.82	4787	6902.26	6668.01	6940.26	5553.16	7535.36	6307.26	10450.8	8160.22	9123.55	8519.91	11575	9605.46	8257.84	6787.66	9816.05	10153.6	7034.16	9050.59
M259.13693T9.34	259.137	9.34107	-	-		14025.5	49878.8	45187.5	20103.9	42143.3	31019.7	29792.5	29084	31552.2	31917.5	37154.6	25975	4481.81	39761.6	16925.9	18009	27441.2	29086.2	33293.6	22940.1	20382.7	14063.2	27224.9	296.342	20242.2	32859.4	20202.3	31805.8	40681.8	29306	16361.4	21073.5	30090.5	18416.9	30779.5	44024.6	29788.6	31323.9	20675.2	16391.7	24514.7	17438.7	20311.9	32223.1
M259.20567T17.98	259.206	17.9769	-	-		21380.8	40303.6	22059.6	51365.9	24723.5	6644.42	21200.2	24189.4	17161	2055.24	34658.5	10910.4	20989.5	24756.5	22006.4	24667.1	43838.7	7505.64	21420.9	21010.5	15199.6	23594.1	20433.5	24644.2	23121.1	27054.1	24531.4	21596.7	19274.9	21932.1	13170	24060	22356.5	22024.3	-3737.45	24248.7	63975.1	23629.4	11256.9	19958.4	22757	26069.6	21799.4	22209.1
M259.93697T0.74_1	259.937	0.735857	-	-	[M+K]+ 220.972	10338.6	11014.8	9452.61	11957.6	10997.3	10036.4	10459.7	9703.62	9749.7	11084.2	8501.74	13687.7	10379.9	12939.4	11709.6	11801.5	10683.5	11261	12337.8	11484.8	14423.4	13880.3	15124.5	12458.1	12107.1	10225.4	11445.5	10881.3	10093.5	10219.9	11931	8455.15	10847.9	9822.11	9876.96	11492.2	10081.1	9131.08	10143.3	8445.56	8222.47	8895.91	8485.2	10437.6
M259.9751T0.74_2	259.975	0.735555	-	-		16568	17014.3	17090.7	15250.8	14302.3	16441.5	17912.5	16057.5	16432.1	20668.2	15239.8	16084.5	15175.7	17467.1	16469.1	17266.6	15229.1	15701.8	16979.2	15012.8	16672.9	18871.5	14658.6	16358.2	17813.8	16116.4	17868.3	15386.1	17526.5	17950.7	15463.7	15243.7	15176.9	15079.7	12789.1	18484	16414.7	16112.4	18335.2	13332	17235	17783.4	16185.1	18138.4
M260.11971T11.81	260.12	11.8133	-	-	[M+2H]2+ 518.222	5969.18	8786.34	3613.78	4401.26	6157.75	3597.4	2548.24	4577.91	4964.78	6099.25	5390.37	5419.78	3517.48	1361.46	5724.72	8081.3	3400.94	6227	4887.24	5421.38	8965.64	6514.96	8680.26	2423.51	6844.38	8542.77	3148.81	8491.04	3914.73	8256.61	3931.03	3124.01	4679.56	7492.48	7967.52	7079.99	11302.7	6071.27	7961.48	5612.74	5739.56	7271.33	7301.52	8831.46
M260.12401T1.1	260.124	1.09537	-	-		3481.27	4580.85	5745.7	3727.65	3963.05	4090.98	6491.76	3198.9	6612.93	5822.45	2859.81	4113.24	4489.45	4028.57	3309.84	3295.52	4327.83	3922.8	4020.69	6871.61	4570.31	5330.03	2230.34	2230.34	4225.04	2218.4	3942.79	5293.6	5769.42	6809.61	2875.14	3125.21	3227.76	1991.92	4209.05	5691.02	3950.99	6274.08	5398.91	4265.85	4163.76	3399.65	4232.73	3076.26
M260.18576T9.02	260.186	9.01775	-	-		7678.69	10857.6	19944.4	7969.74	8512.23	6937.16	7311.95	7929.14	1947.77	6848.64	8242.82	7899.51	6883.24	10195.3	6745.34	7076.96	6976.86	7106.63	2861.56	5510.66	14161.1	5578.78	5477.91	5287.79	8028.46	7273.84	6596.69	7319.59	5129.76	6337.47	9525.01	2838.7	7545.23	7484.99	6848.29	8100.78	6628.55	5205.51	12440.7	6325.68	7654.32	4781.82	4969.63	5735.25
M260.20893T17.98	260.209	17.9767	-	-		3444.82	9691.7	4481.03	8644.11	5462.63	1560.17	4993.99	4671.82	3686.71	-617.804	7152.4	2057.99	4279.29	4657.76	4656.68	4622.64	10532	3861.6	4967.4	4634.68	1836.93	5200.75	4079.56	4539.25	5408.26	5847.12	6194.14	4600.55	3673.66	4975.85	3007.22	5233.79	4742.07	4714.97	-1566.28	5295.01	13544.1	5218.73	3402.67	3590.36	5032.13	5547.94	4392.79	4341.52
M260.62179T11.81	260.622	11.8073	-	-		7021.13	9924.29	2838.99	5380.92	6822.31	4170.32	1895.73	7368.99	7133.82	10102	4553.49	4883.05	6816.76	1634.92	7225.75	8771.57	3633.02	7085.6	6069.29	5579.5	10876.2	7259.6	7496.71	2173.2	6609.87	11351	3622.55	9374.55	4391.95	8675.85	3960.5	1641.74	4558.15	8206.7	10108.7	8307.28	10883.1	7043.49	8124.7	5529.63	3684.1	10707	11430	11365.7
M261.01129T0.93_1	261.011	0.925724	-	-		85522.7	77102.4	88262	80294.6	81227.7	84443.8	84330.5	67919.3	96720.4	74052.3	71150	78948.1	74874.6	73999.7	76749.6	83484.2	90635.1	80822.7	92326.1	79097.3	83403.1	80777.2	86173.3	82351.9	74619.4	84467.5	86039.9	75501.6	78110.5	77373.7	81770.9	60056.3	83823.3	103313	80355.1	86299.3	82482.2	86096.2	80310.6	64282.2	86390.9	89490.4	77702.2	91852.1
M261.03694T0.93_2	261.037	0.925292	-	-		87084.8	56478.4	50076.6	43328.8	56296.5	44065.7	49394.3	71302.4	40873	62305.7	43094.9	52850	46210.7	48259.4	59775.4	49247.2	68078.3	67707.7	43805.1	63533.5	76857.2	63862.9	63661.7	54079.3	47092.6	60078.6	53182.9	57389	62632.7	50865.7	44057.6	63047.2	67266.7	52583.7	51274.6	54655	66720.5	73355.6	52901.8	48335.1	45674.3	62817.1	57832.1	51583.3
M261.14461T7.61	261.145	7.61466	-	-		42106.8	39211.4	42606.9	17415.2	40273.9	52814.6	37947.8	39572.4	35376.2	59141	36771.2	35514.3	34399.3	47111.8	44018.4	36606.6	30190.3	18726.7	43951.2	47407.1	47544.7	40995.8	36721.2	48322.8	30498	43367.9	71094.9	37173.2	39737.7	39044.7	38609.3	37343.2	45329.2	25915.6	19603.4	44034.5	59540.1	42747.3	49077.3	31846.4	40523.8	45058.1	49010.7	36391.5
M261.62232T11.81	261.622	11.8131	-	-		4911.41	8227.89	4369.72	4876.24	6662.2	4287.09	2151.67	6239.12	7006.21	8896.77	4099.42	5923.48	6276.29	3202.26	6857.57	9083.94	4209.22	5623.99	7715.37	5311.17	8691.32	6040.85	8758.17	4304.74	7482.05	10998.8	2297.6	6434.39	3682.67	7249.3	4540.17	2442.04	5229.4	5441.34	8077.47	6148.35	7999.86	6509.53	6175.7	5752.81	5236.3	7096.44	8777.59	7472.5
M262.01349T2.44	262.013	2.44177	-	-		10993.8	14201.4	17087.2	8223.54	13403.9	11561.2	7762.43	11961.7	6696.35	11107	13271.1	10940.9	5839.02	11384.6	5348.16	9701.44	12574.9	9175.75	6884.36	9907.2	11534.6	5542.1	11703.1	16614.7	7728.89	10375.6	13499.2	9509.48	11035.5	12960.5	9982.69	4473.02	12528.7	10107.9	6068.77	4975.96	9274.27	6429.23	10721.2	7689.81	12192	10646.9	6478.77	7970.25
M262.01475T0.92_1	262.015	0.924523	-	-		6034.62	5310.07	6664.94	5488.85	6248.24	6071.17	5312.54	5364.83	6565.12	4713.55	6389.94	5569.5	6672.47	4678.59	5821.23	5980.59	5847.28	6093.66	6317.08	5929.81	6565.9	5393.62	4523.77	6511.1	6256.81	6244.23	6658.52	4772.15	7068.48	6421.96	5379.35	4641.32	7197.62	7031.21	5954.39	5271.23	5856.49	5444.38	5283.65	4181.04	5750.69	5620.26	6071.54	5886.53
M262.03992T9.12	262.04	9.1229	-	-		5433.85	4188.56	4888.74	6152.65	7091.48	5088.29	5358.92	5611.32	5247.35	4995.86	5155.01	5077.7	6534.49	5099.37	4316.49	4862.2	5698.16	4835.71	5579.43	4759.35	4820.34	4715.34	4614.89	5197.45	4677.16	4562.41	5022.93	6199.45	5506.07	4358.09	5174.3	4795.37	5028.93	5921.7	5612.63	5605.08	5048.72	5191.77	5910.26	5640.93	5442.66	4870.71	4853.79	4950.9
M262.04058T0.92_2	262.041	0.924323	-	-		3999.41	4251.38	7817.05	5635.12	7088.71	6070.97	4029.17	4048.47	6962.25	3699.78	3089.49	4819.29	4178.53	2926.06	3719	4743.06	4343.97	4998.12	5747.97	4438.48	5723.55	4169.4	3757.24	3847.72	4638.54	5675.05	2564.78	4058.43	3313.96	3306.97	3300.54	4608.79	6898.25	3694.39	4857.07	3804.62	4918.22	4608.27	5226.47	4542.92	6549.05	6095.39	3963.17	2360.7
M262.90668T0.92_1	262.907	0.917175	-	-		2593.29	2699.1	2469.94	2864.97	2414.51	1950.43	1939.44	3774.61	1928.05	1809.99	2625.54	1948.63	2283.81	2952.56	2135.88	2388.09	2765	3262.38	2590.28	2653.47	2475.54	3581.6	3100.35	4396.85	2995.83	2397.17	2765.6	3078.07	4105.8	2701.79	3501.28	2935.92	2555.81	1889.34	2779.99	2751.17	2548.26	2086.57	2680.47	3477.11	3450.06	3356.35	3374.86	3401.94
M263.0085T0.92_2	263.008	0.924685	-	-		29053.9	24384.3	30333.5	24797.4	28256.5	29175.9	26899.2	22771.5	32358.6	24513.5	26076.9	27479.3	26471.1	26279.6	27070	29185.6	32648.8	28540	30440.7	26552	28285.1	27441.5	25505.3	28747.1	28078.1	29922.9	32022.5	23681.7	28039.6	28726.1	26154.2	21119.5	31490.6	33916.2	24499.4	26514.9	26066.6	28726.9	26932.9	20262.2	25369.2	32276.3	28088.5	27851.6
M263.01975T2.43	263.02	2.4294	-	-		2239.34	3688.24	4686.31	2568.31	3867.65	2988.56	2694.88	3476.69	2270.31	3091.37	4113.3	2767.58	1785.23	3438.16	2158.89	2582.77	3494.24	2295.04	1443.5	2702.93	3606.39	2053.54	2710.06	4580.49	2173.28	2520.01	3044.98	2545.9	2601.88	3573.15	2369.9	1484.34	3556.33	2689.66	2017.89	1363.66	2782.64	1140.81	3322.17	2157.16	3583.89	2948.94	1715.2	3260.44
M263.02382T11.15	263.024	11.1511	-	-	[M+H-COCH2]+ 304.025	10736.6	10452.3	11023	4365.81	9111.6	8027.71	10207.9	8132.3	9853.48	11076.8	13475.2	10716.8	7439.1	8583.57	10038.9	8107.41	8428.81	10288.2	7319.4	8396.05	8594.35	7282.21	7496.07	8839	6172.69	9970.94	10248.8	12552.1	8782.3	9529.35	8236.52	7244.7	9252.45	9242.47	8561.89	10161.7	11865.8	7151.88	11077.8	7383.85	8153.59	11271.2	9376.67	9951.02
M263.08722T0.98	263.087	0.976656	-	-		11036.4	14691.3	10252.6	13315.2	12465.3	14239.6	12885.1	13815.2	11179.2	9882.4	11334.1	9388.12	12733.5	12671.6	11573	12631.5	12540.4	14302.4	11525.9	13531.2	11635.9	13912.7	13995	11070.2	14732.4	14642.3	13533.3	13047.6	15327.5	15359.1	15084.8	14300.5	13838	15949.8	17084	14012	16400.7	19775.8	19399.4	15482.3	11845.3	16872.1	14892.2	11253.3
M263.16422T11.61	263.164	11.6058	-	-		3044.72	4213.27	3920.69	1734.42	4201.47	4431.77	2386.14	3234.85	4547.39	3517.66	3183.02	4283.23	3732.54	8713.52	5437.87	4518.85	2862.88	4551.82	5374.32	3443.68	5603.63	3334.16	6036.68	2382.59	5757.96	3958.44	7187.62	3415.39	5316.12	5146.55	2718.44	4642.42	5309.52	6333.77	4473.8	5291.29	5324.49	3358.76	6754.4	3900.43	4927.14	5127.91	4393.18	4689.88
M263.1642T13.34	263.164	13.3435	-	-		33128.2	23545.4	26528.2	16601.4	22718.6	27388	28652.8	27028.9	28256	26350.2	25482.3	25826.9	21904.4	27542.7	22761.2	29222.2	24167.7	20477.8	21800	25169.4	23359.5	27449.3	17413.9	22834	29984.5	36656.6	32238	20474.8	23887.9	26323.1	20803.6	22928.4	21046.2	20983.3	16954.9	32876.7	29684.3	20980.5	29134	21005.4	16722.2	38370.2	23904.3	29213.5
M264.94975T0.74_1	264.95	0.737347	-	-	[M+2H-CO2]2+ 571.878	11032.4	11884.4	13024.6	12642.7	13236.8	9372.75	9227.34	8746.72	12086.4	9896.93	10418.7	15593.5	11558.7	11264.6	8980.18	9373.33	18917.9	9496	19523.3	8722.47	10950.7	10279.3	12364.4	10672.2	9898.54	9161.11	11297.2	17930.9	10232.5	12374.5	11057	10978.5	16677	17273	14266.2	11151	11287	13547.8	13507.2	11089.7	23238.5	22361.1	11666.8	13311.3
M265.01561T0.74_2	265.016	0.735108	-	-		18304.1	15955.6	20734.7	15533	15813.5	17443.6	18350.4	14799.9	16766	16236.2	15736.6	17267.3	17883.5	17307.9	20920.7	20400.9	21386	16029.8	21334.7	16376.5	17698.6	19295.1	15793	19347.1	25527.7	28458.8	18928.1	19788.3	24522.9	15990.7	17725.4	18218.8	16888.6	17332	14324.3	22584.5	21846	18141.9	20406.6	14186.2	21410.1	23296.2	19567.9	21251.8
M265.11839T8.37	265.118	8.36887	-	-	[M+Na]+ 242.128	696.732	12686.1	19611.1	9608.97	19853.5	11626.4	9019.36	13281.7	33295.5	10736.4	17305.1	10584.4	3721.97	14198.5	10321.6	10938.5	11585.7	11538	9201.55	10751.7	3960.79	10296.8	5064.94	1853.54	12254.2	11216.6	12249.2	14077.3	13290.1	10745.7	201.065	13990.9	10020.6	9886.53	11877.7	17296.7	11384	10498.4	26869.8	10031	12783	12699.6	10484.5	11297
M265.17981T16.13	265.18	16.1281	-	-		4513.92	3513.69	3165.32	3001.96	3484.7	3513.49	2556.7	2595.67	4933.96	3224.59	3370.43	4884.07	4731.73	3581.19	5619.03	5845.72	4564.37	3422.02	5123.64	3276.6	4065.77	3288.74	3074.89	2375.2	4961.69	8152.82	5906.33	4128.98	4436.81	3687.23	3736.36	2453.98	5585.13	4631.7	3691.3	6718.78	5355.33	4716.51	6896	4302.28	1787.01	6134.39	6415.69	5684.17
M266.01693T0.74_2	266.017	0.735796	-	-		6236.25	5702.41	6021.45	4593.28	4737.08	6960.1	5691.49	7086.17	5417.76	6051.98	5766.43	7161.03	5076.88	7190.58	7907.62	6471.57	7029.05	5546.7	7901.79	4434.7	6202.76	6509	6354.36	7478.18	6927.6	8930.98	6855.7	6642.95	8948.79	4829.66	5689.6	5745.66	5331	5470.86	6218.44	7370.82	6789.71	5514.2	6522.87	4807.09	5997.81	7747.07	6314.96	7289.07
M266.10729T14.64	266.107	14.6432	-	-		6500.46	5587.92	5348.61	5178.17	6489.38	4334.97	5070.05	5878.1	5443.84	5716.07	7189.5	4960.24	2152.34	4705.25	5843.05	5145.65	4358.39	5073.88	4287.8	4390.34	4691.91	7567.73	3438.66	6873.19	6722.38	6272.06	5416.92	6923.06	3822.25	6383.96	6826.02	4352.81	4904	4458.24	6065.08	4587.53	6578.62	3871.94	8179.8	4620.95	4454.06	7613.79	7084.93	9898.21
M266.13881T8.29	266.139	8.28642	-	-		5338.02	10201.5	4672.76	2465.09	6956.73	5813.58	4205.16	5877.35	7984.18	4424.7	5004.77	4787.09	3804.96	5738.23	6218.81	4898.05	4737.74	10758.1	6846.44	5350.68	7117.8	6580.93	6643.44	5401.72	6022.72	7386.12	5659.32	8758.34	5364.43	5507.91	6009.34	5410.3	5557.71	6057.69	7772.66	9094.8	5546.16	6295.92	7642.61	4782.23	7387.11	9542.95	10409.1	8656.18
M266.60241T13.96	266.602	13.9618	-	-		8129.72	6195.47	6417.43	5618.31	3439.5	6697.08	6541.68	3893.52	7011.57	6776.12	5050.76	5900.6	7514.61	7114.86	9965.62	10710.6	6458.62	6558.01	8971.19	6048.65	5318.03	6933.12	4209.19	5098.05	6674.53	8376.97	7608.95	8096.99	5894.02	8108.71	7099.86	6083.22	4966.42	4603.76	6021.39	4794.46	6761.11	5217.76	6485.42	5681.53	5194.09	9727.43	6229.6	8134.24
M267.01371T0.74	267.014	0.735857	-	-	[3M+2Na]2+ 162.686	6289.14	5518.34	5503.5	5002.24	5665.06	6605.21	7001.66	6136.28	7980.18	6396.38	5660.16	7111.6	6283.5	7401.63	6782.68	6808.44	6751.9	5450.73	6831.92	5770.51	4848.19	5660.07	5594.59	6441.01	6113.36	7625.72	5352.14	5464.36	8102.7	4653.51	4345.51	6191.14	4886.89	4909.19	4363.98	5346.41	6975.54	6744.42	6701.32	4048.06	6416.2	8408.34	6207.18	6673.98
M267.10893T6.91	267.109	6.90673	-	-		4111.09	3370.13	2743.27	5721.67	4640.87	2179.23	2864.15	5596.17	3890.17	3786.12	2760.31	4224.68	3918.82	1580.51	3177.95	5311.01	4676.95	2222.98	4062.85	2651.45	3477.6	4655.92	5669.85	3058.65	4224.84	2467.77	5001.97	3545.04	3719.15	4096.66	3560.69	2814.6	3203.81	4500.91	3297.99	2594.21	2816.94	2239.58	2967.28	3235.79	3139.89	4847.7	4315.18	4029.64
M267.61025T14.64_1	267.61	14.6433	-	-		15788.4	15847.4	13590	12399.2	19401.1	16023.5	19104.3	8738.09	16067.2	19181.1	14955.4	12724.6	13805.7	14181.3	20422.2	18852.5	13243.8	13914.5	14103	15542.1	14867.4	19823	10103.9	16412.7	14914.6	16763.8	17132.6	17562.7	13798.4	15134.1	16679.9	9945.34	12454.1	12094.1	14211.7	10647	15024	10810.2	17016.4	13245.7	11492.5	18188.1	14981.4	23129.7
M267.64714T15.24	267.647	15.2373	-	-	[M+H+K]2+ 495.33	4274.64	5158.03	5399.71	3784.5	4166.58	4042.03	2957.32	3761.95	3526.2	3905.17	3398.36	3821.23	2500.56	2911.04	3059.35	3237.47	4225.09	2718.87	3140.86	3961.04	3400.65	3974.12	2696.34	3402.67	4770.88	4575.49	3186.95	4022.65	4355.02	3128.8	3897.45	3956.07	4653.98	4049.36	4027.23	4474.28	5652.84	4935.61	4646.29	4146.93	4647.96	4715.97	3604.66	3921.11
M268.21853T20.34	268.219	20.3353	-	-		47962.8	25415	48759.9	13863.3	61699.9	50614.8	37176.8	90962.3	68412.7	75060.3	51251.7	48754	24987.8	36454.3	36045.4	23472.2	17282.5	25679.8	32469.5	10289.8	41568.7	18181.8	30348.3	28192.9	60589.3	22407.2	50639.8	45880.6	51347.9	42672	53895	29748.3	55371.8	80344	61780.5	69944.2	50729.8	62574.8	64101.9	59469.1	83204.4	67649.8	45177	46298.9
M268.60848T14.64	268.608	14.6432	-	-		8838.78	4696.9	6686.71	4797.79	7737.02	7972.52	5657.52	5384.43	6710.85	9762.09	6889.64	5855.45	5543.34	9611.98	8632.08	9735.54	6087.49	7853.57	7886.58	7027.84	7452.85	8442.86	5942.1	8467.22	7119.72	8010.93	6700.39	6232.09	6523.93	6528.75	7167.26	7443.06	4095.01	3581.66	6427.11	3036.61	5702.24	5030.71	7110.98	4867.99	5324.77	6992.97	6699.02	7763.08
M268.61811T15.53_1	268.618	15.5322	-	-		8905.7	6285.52	8682.16	8310.79	11919.3	8334.97	10018.9	8431.16	11570	11167.4	10800.8	7748.35	5495.82	8294.79	8031.22	11025.8	8689.44	8841.3	8715.74	6518.55	8024.08	9941.48	7857.14	7530.28	10752.6	9449.72	9492.22	11720	10309.1	8843.34	9452.33	11521.9	6989.34	7980.21	10943.2	9579.65	9213.56	10445.9	10630.5	3554.2	6805.92	7391.77	10306.3	10183.6
M269.11993T15.53_2	269.12	15.5318	-	-		2344.1	1324.25	1957.08	2243.74	2505.37	2339.58	2186.81	2386.81	1868.86	3255.51	2906.47	1753.93	1682.68	2285.75	1843.81	2497.83	2142.61	2665.89	2160.66	2110.93	2220.48	2681.92	1838.35	1756.03	2447.98	2706.66	1973.34	2097.73	1608.61	2891.58	2032.7	2461.26	2223.24	2300.55	2293.22	1694.57	2022.21	3140.95	3364.37	1146.69	2399.97	3733.13	2617.86	2991.27
M269.22199T20.34	269.222	20.3356	-	-		9541.25	6897.96	12310.2	3101.68	13031.5	12812.8	6636.65	17017	14821.6	13623.5	8572.16	10224.2	4752.86	5702.49	6018.14	3305.45	4531.95	4790.96	6924.86	1305.39	10858.4	5268.68	5340.1	6310.75	11289.8	5637.84	11035.3	13580.8	11847.1	9050.32	10612.8	6166.23	12221	18424.3	13693.8	14162.1	10642.5	15704.7	13555.4	12071.4	18307.8	13758.7	9542.84	10344.8
M269.22642T18.2	269.226	18.202	-	-		241052	116456	255475	83761.3	259150	207369	155069	238854	253540	246964	141587	164446	137869	191301	152931	166043	150857	156051	232646	161120	271125	222183	211666	216836	283882	166810	217075	249065	231088	180912	189424	78438.3	189397	233307	219627	243266	202804	206512	192088	204422	234356	222434	136426	178441
M269.61633T15.53	269.616	15.532	-	-		3122.06	2166.04	2777.26	4178.25	4038.47	2849.33	2841.38	3455.32	3682.71	3794.66	3004.93	2701.17	1596.75	1721.16	2355.69	4182.32	2544.99	3286.52	1785.08	2712.31	3105.75	2879.99	2201.44	2423.63	2818.99	3513.75	2784.59	2542.38	2989.96	3739.92	2992.99	5067.86	2682.57	3897.25	3193.81	3100.59	3496.42	4191.73	4019.79	2604.18	3826.54	3213.9	4676.67	4224.4
M269.95966T0.74	269.96	0.735108	-	-	[M+K]+ 230.995	2738.04	2243.73	1672.71	2465.37	2858.05	2626.86	2833.65	2324.13	2642.1	2500.31	2102.24	2979.49	2293.08	2204.93	2466.99	2985.37	2348.79	2511.96	3214.95	2084.37	3109.55	2939.82	2375.22	3605.5	2218.7	2362.3	2720.19	2555.74	1700.56	2327.91	2886.31	2505.65	2789.21	2485.15	2774.47	2926.48	3226.62	2736.59	2518.61	1957.14	1961.02	2600.37	2930.37	2087.52
M270.22987T18.2	270.23	18.2016	-	-		54695.7	25092.8	54471.3	17332.6	56798	44688.5	32230.6	51987.1	57020.8	53618.7	29131	36203.7	31903.8	41799.4	32025.4	35641.1	32456.5	32627.1	47760.3	34768.3	55016.9	44615.7	44140.2	46012.5	55580.6	37193.5	45850.9	49432.2	47787.8	38038.9	40927.7	18253.6	38393.3	49470.2	45753.5	45247	45908	42753.5	38860.3	43885.1	53594.8	49172	27311.6	37621.8
M270.27928T17.04	270.279	17.0374	-	-		19684.1	20176.9	9172.34	11135.3	12853	9427.13	8482.74	9470.79	7926.71	17007.4	8499.68	10665.2	13525.3	16183.8	10819.5	10350	9697.47	15295.6	13540.4	9321.26	7618.09	18098.9	8451.04	12790.8	9856.56	10882.3	10156.8	8761.45	11678	16264.6	15175.6	18805.3	12767.5	28326.3	16500.2	8035.96	10971.4	14484.6	12465.1	14657.7	5836.76	14071.9	11324.9	10532.4
M272.18582T9.02	272.186	9.01695	-	-		5305.81	6154.89	5838.82	9402.6	8579.88	6000.64	1990	7866.93	10065.6	5538.65	7215.68	6904.3	8506.92	13402.6	14847.2	9212.5	5385.01	8250.1	5481.5	8191.46	7220.29	3097.8	6744.92	803.971	5317.36	8555.97	4745.68	8171.8	5830.34	3199.24	10516.1	3767.09	2497.73	1933.41	8948.68	11951.4	4626.51	3457.14	7197.88	5146.45	6464.31	8921.24	7760.41	2527.02
M273.1489T11.81	273.149	11.811	-	-		5436.55	7798.06	3717.89	3808.45	5010.73	3425.88	1297.25	5858.46	6098.83	7881.62	4180.75	3714.28	5242.3	1776.19	4030.48	8153.7	2689.18	4624.7	4386.87	3495.76	5845.64	5331.32	6018.2	1708.22	4967.38	7268.89	2271.4	6642.07	3064.58	5270.3	2948.57	1702.39	3173.88	4743.49	7227.96	4958.42	6386.42	5154.33	5495.21	4206.81	3294.31	7054.17	7056.93	8224.83
M273.9547T0.74	273.955	0.738001	-	-	[M+K]+ 234.99	72678.5	80952.4	91813.7	80477.1	92494.7	85982.8	83486	80202.9	88225	90719.3	86032.9	81962.3	89737.6	88953	85706.6	86089.7	85487.3	85142.6	96224.2	80180.5	78943.3	77881	74469	70134.4	76080.8	73851.1	89098.2	83665.7	79479.7	84356.9	81491.8	73869.4	84090.6	84359	85862.2	80771.7	71938.5	73826.5	79336.2	71388.5	80032.3	82860.6	76515.6	79266.1
M274.12242T14.26	274.122	14.263	-	-	[M+2H-HCOOH]2+ 592.234	19766.7	15752.7	16546.3	12692.9	12496.7	12582.2	16782.3	13504.1	13634.8	15232.1	14673.5	16754.4	10394.2	17174.7	18648.3	12003.3	13347.5	12955.1	12056.7	9865.07	12978	13951.6	11316.1	14917.7	18820.2	16520.2	17451.2	14190.5	13715.6	18069	16345	14205.5	16240.2	17669.3	14998.6	13631.1	17029.1	16648.4	20031.4	10951.4	14884.1	15830.4	14619.6	14701.4
M274.1224T14.44	274.122	14.4373	-	-		6959.15	5464.24	5234.4	3987.84	5315.44	5242.55	5813.75	5809.21	5624.28	6354.24	4613.59	5195.97	4022.68	5588.29	4836.25	4190.92	3779.85	5009.37	5842.64	3399.87	4470	5130.37	4465.07	4447.7	8319.23	7240.14	6434.24	5628.05	5860.46	7057.37	6701.23	5887.01	5554.38	7347.45	6312.31	6969.92	7541.22	7719.64	7836.76	4981.62	5098.57	5567.06	6839.43	6117.91
M274.62408T14.27	274.624	14.2669	-	-		7102.66	4586.68	5073.68	4004.23	5428.55	4264.11	5743.21	5521.14	3949.06	5168.15	5504.8	5622.54	4210.47	4538.26	4880.92	4669.55	4994.59	3761.46	3385.54	3722.4	4760.14	5747.32	3820.98	5047	6786.05	4442.22	5169.89	5007.88	6554.83	5856.1	5476.2	4655.15	6227.49	6661.6	4354.87	6839.86	9730.64	5979.02	8703.1	3622.72	6592.7	6971.15	5972.45	6083.35
M274.93158T0.85	274.932	0.845627	-	-		22790.1	19365.7	20388	21422.1	21518.6	25618.7	28145.4	21278.1	22656.3	20933.7	16407.7	21176.9	21270.1	21555.2	22103.3	21370.6	20219.2	17552.7	21137.3	24987	23391.7	21829.2	24395.5	23589	25811.2	26470.2	22902.6	23481.4	19020	19253.1	26412.2	26727.8	19160.1	23748.6	24098.6	21146.9	26098.4	32283.2	21512.4	28035.3	17525.4	19722.5	25062.9	22216.1
M274.95178T0.74	274.952	0.736865	-	-		10484.1	9651.48	9622.16	10084.3	10417.7	10849.2	9331.2	9104.43	8640.73	9933.36	9216.46	8420.1	9390.49	10122.5	9401.48	8702.28	9252.25	10564.9	9790.85	9432.08	8450.85	9017.87	10584.4	8321.87	8763.22	10139.3	10986.9	10332.2	9467.55	10213	11325.2	10133.9	10935.1	10145.1	10770.3	9548.37	9867.07	8958.19	11503.3	9522.97	9326.82	10099.8	10686.3	10583.8
M275.01146T8.39	275.011	8.38552	-	-		3807.46	4050.65	3982.47	5059.8	3411.24	4272.65	3660.93	3675.47	3817.79	3788	4936.92	4105.38	4799.14	4654.62	4345.62	4485.79	3930.23	4619.62	4605.85	5058.08	4866.79	4784.85	5029.83	5536.55	5707.91	4669.08	4813.68	4315.76	6093.93	5544.6	5580.86	5008.1	4557.77	6073.56	5161.43	5040.09	5349.89	4444.04	5069.83	5561.73	5564.38	4568.71	4764.49	4554.4
M275.13295T15.24	275.133	15.239	-	-	[M+2H]2+ 548.253	3489.41	3028.2	2973.03	2759.37	3299.56	3607.76	3701.47	3419.18	3269.52	3556.98	3240.2	4038.6	2504.6	2821.37	3680.43	2790.89	3082.48	2853.68	2962.81	3269.63	3690.54	3113.68	3453.06	3644.72	3854.02	3677.26	3660.24	3952.43	3862.29	3389.59	3720.08	3818.47	4391.99	3777.3	4486.96	4445.29	5041.17	4530.07	4761.93	4761.06	3777.52	3445.2	3877.55	3386.24
M275.13376T14.12	275.134	14.1198	-	-	[M+H]+ 274.13	5176.17	8607.99	6897.16	2217.02	5548.03	8871.14	4265.27	9888.98	6867.54	4009.81	7451.53	4687.8	6286.5	6316.8	7896.23	11993.1	9082.44	7179.82	11873.2	7416.46	6431.64	7196.34	11065.8	6768.44	12526.5	8725.58	11767.7	6668.82	7568.96	6496.91	4887.42	6863.88	5665.92	5170.33	4771.36	5837.92	7362.22	7759.38	7108.05	5472.51	3253.06	5917.09	6650.49	5873.81
M275.62586T14.43	275.626	14.433	-	-		12972.8	10915.4	8241.19	5098.46	9625.1	11412.6	11261.8	8016.3	7524.58	11308.4	5609.03	9192.36	9214.62	12389.4	12249.7	9689.36	9038.96	10583.7	10846.6	8251.09	9110.79	9444.3	8231.16	10193.3	10499.5	10902.5	9162.48	8524.57	10224.8	9033.19	9156.36	8866.28	9956.37	9534.76	10787.1	10667.8	10157.1	9601.42	11650.8	7460.33	8357.51	9810.39	8579.79	9173.65
M275.62603T14.26	275.626	14.2629	-	-		19856.4	19486.1	18695.7	13462.2	19503.3	17033.8	21968.7	17499	17318	16672.9	12262.1	16955.2	17190.6	25768.7	20711.2	18041.5	20179.3	15143	20934.7	17141.8	20096.7	20799.7	16094.7	21349.2	27984.8	17239.6	20853.8	17311.3	19231.3	18170.8	19158.9	15424.4	18528.5	17020.9	18148.3	18283.7	22928.6	18410.3	23531.5	13187.2	13466.4	20162.8	16746.1	17535.6
M276.11904T1.01	276.119	1.00959	-	-		24141.9	29106.4	22081.3	18525.2	25940.8	23186.2	20837.4	30126.9	37571.9	32143.8	25561.4	29851.7	22608	27339.1	29383.2	24833.4	23138.7	19706.4	27469.6	25147.8	20753.1	24394.7	19131.4	16849.7	23933	24399.6	34936.7	30645.5	27446.5	29839.3	17412.5	29005.1	35834.2	16504.6	20218.7	38100.9	35697.2	24122.8	40216.2	35687.7	25576.5	36660.7	28881.7	20798.1
M276.12828T14.26	276.128	14.2581	-	-		6430.47	8414.75	5520.63	3744.96	5820.57	5553.14	7759.97	3322.48	4599.91	7677.78	3274.18	6038.73	5578.73	5869.07	6666.98	7324.51	7226.21	5547.88	5081.53	5707.61	6322.8	7691.34	5770.1	6492.59	7411.51	6787.76	7601.27	5334.72	6495.3	5558.76	6438.77	5736.09	6046.35	6749.9	6777.31	6488.58	7776.5	7313.74	7503.75	5499.32	5535.34	6989.24	7125.87	7318.91
M276.62407T14.43	276.624	14.4343	-	-		4613.15	4212.61	3595.2	2823.06	4143.07	3815.19	5317.59	3585.98	4130.92	4159.77	3785.54	6425.87	4498.44	5933.96	6162.41	4644.77	5584.45	5144.59	5869.23	4413.5	4947.4	4208.81	4132.52	4672.76	5467.76	5263.08	4870.01	4134.87	4484.12	4604.85	4477.88	4802.91	4254.15	4858.96	3736.07	4509.45	4582.22	4972.59	6661.17	3781.3	3558.95	4424.58	4921.62	4577.44
M276.6241T14.26_1	276.624	14.2629	-	-		9267.85	9219.13	7608.43	5798.51	6870.08	8877.07	8774.62	8301.92	6596.56	7269.88	5783.81	7043.73	6777.21	12106	12770.4	9271.96	10402.7	7891.94	10420.7	8090.37	9267.77	8173.45	7148.75	10289.3	13922.3	7672.96	10601.9	9076.5	7662.24	9929.3	7814.88	7752.34	7575.15	7769.23	6033.91	8228.48	9672.06	8476.87	10953	7676.89	7787.45	8735.01	8771.58	8785.04
M276.63357T15.24_1	276.634	15.2386	-	-	[M+2H]2+ 551.26	8992.1	8321.37	8535.72	8550.82	10039.1	9774.49	9276.52	8533.52	8612.35	8930.56	9362.73	8645.97	7293.45	10147.4	8679.68	8208	8889.46	6736.05	8640.66	8107.24	9149.46	7549.61	8843.53	9354.5	8432.23	8057.23	9272.06	8665.69	9204.47	9936.52	8433.36	9182.86	10722.7	8310.08	9383.86	6948.2	9802.74	8910.13	10295.2	8929.69	7545.06	8833.38	9932.47	8498.39
M276.65273T15.24_2	276.653	15.2397	-	-	[2M+H+K]2+ 256.675	9379.73	6021.88	7391.83	5454.16	7402.26	5890.84	7942.56	6517.33	6423.76	9306.03	7487.6	6957.85	5002.29	7486.58	7989.6	6714.96	6087.87	6168.98	7019.88	6241.32	7370.32	7758.92	7986.03	7878.08	11175	8687.88	8449.53	8100.2	9565.48	8220.01	8212.94	9468.76	9232.55	11282.5	12491.2	8868.33	8859.51	9738.31	10512.5	8944.02	6816.01	8269.23	8300.7	6866.77
M276.98528T0.92	276.985	0.922287	-	-		23828.2	19582.4	24250.1	21408.9	21848	20930.7	24723.6	18201.2	26848.4	23240.5	20167.2	23216.5	25078	22272.2	27966.3	22530.9	24364.8	22709.5	27381.7	25164	26775.2	26211.9	20254.2	22603.4	22287.5	26948.2	26459.2	20375.9	22890.4	19670.9	19312.1	21365.9	24431.8	27059.4	22342.3	23324.2	25881.1	31437.7	23353.9	15518.9	19672.6	20231.3	22529.2	22090.9
M277.00325T10.25	277.003	10.2528	-	-		4103.14	6591.88	6797.4	4015.89	4886.37	3923.86	3767.51	4225.58	4429.31	3830.82	11527.4	4175.4	2379.22	5293.06	5681.86	4125.38	3806.28	4393.19	593.959	4737.85	4717.66	4618.22	2161.43	938.538	6259.23	4447.46	4549.63	5230.69	2148.14	2693.13	1989.66	6152.21	4136.63	4646.85	4408.52	9229.9	6418.74	4307.64	11797.4	4130.75	5012.9	5222.77	5079.36	4871.03
M277.10314T1.19	277.103	1.19493	-	-		16038.6	12935.2	16227.6	3913.55	14212.6	19580	14431.4	19105.8	20668.7	22176.4	19169.1	11228.2	12520.3	14440.1	13232.2	11688	14104	9737.01	14109.2	18237.2	16018.9	18331.3	16162.7	13167.7	13003.1	19287.1	20987.7	16095.3	10653.8	20627.9	13953.6	20522.3	21101.5	12690.7	17690.6	16714.7	32300.2	16203.4	17976.4	17357.4	13816.9	18602.1	14122.2	15153.9
M277.15438T15.24	277.154	15.2419	-	-		2595.98	2291.14	3348.93	2269.89	1885.08	2445.03	2380.68	2166.16	3016.47	2489.84	2461.51	2289.74	2410.34	2700.77	1883.62	2345.79	2683.3	2473.85	2499.95	2937.96	2684.47	2666.23	3016.17	2160.18	2977.76	3252.85	3622.98	3066.53	2690.23	2752.41	2606.49	2530.1	3380.68	2075.67	3357.07	2389.65	2207.35	3111.4	3658.85	2337.92	2382.68	2581.92	2301.21	3587.41
M277.63158T15.24	277.632	15.2386	-	-		4547.96	3060.99	2749.65	3378.63	4167.24	3744.09	3408.44	2385.28	3041.26	3311.15	3866.06	3389.43	3243.95	4632.36	4446.61	4197.5	3804.66	3994.51	4557.01	3639.62	3273.63	4574.73	5159.28	3965.63	4296.6	4604.81	4970.75	4244.64	4800.94	4494.85	4683.55	4737.13	5128.65	4217.07	4781.52	4461.51	4728.95	5264.22	4891.02	4276.18	5164.41	4354.02	5334.19	4487.6
M277.94777T0.74	277.948	0.737823	-	-	[3M+2K-H]+ 67.01	3495.55	4544.96	3700.53	3996.67	3925.39	4818.11	4344.52	4041.75	4590.48	4407.86	6068.09	3679.86	4671.44	4574.46	5945.05	4639.41	3948.61	4606.99	5480.42	3954.72	3698.52	4669.94	5261.07	3432.89	4019.55	4170.51	4546.92	4177.27	3634.52	3519.62	4621.31	3856.61	4018.92	4488.11	4633.98	4877.49	4480.89	4343.91	3627.53	2998.5	4197.76	4244.95	4237.06	3735.46
M278.10253T9.94	278.103	9.93906	-	-		22225.5	26262.2	25586.4	15372.2	15438.5	30651	17532.7	20846.7	16641.4	17082.6	18595.3	21425.5	10964.7	17865.4	21958.1	18074.2	24982.5	12409.6	28659	15247.4	19942.6	22035.6	26824.5	27104.6	17451.6	23679.1	19835.3	18382.6	27978.7	22904.1	27715.8	22316.8	33790.2	24856.4	29827.3	23971.6	26769.1	25175.6	23115.1	22471	27959.3	21554.3	28727.7	25198.1
M278.12108T13.73	278.121	13.727	-	-		9638.79	9568.34	8052.28	8409.72	8655.82	9351.51	8350.51	8858.13	10633.6	9455.74	9350.94	7385.37	7084.04	7957.24	9471.1	7241.31	8868.93	5831.18	5732.86	9395.65	3862.9	8103.36	6709	6558.29	9490.08	7160.27	9544.75	6862.78	8467.34	8164.39	6841.23	7770.47	7796.3	10557.2	6028.32	7840.96	9172.09	8610.87	12610.5	5246.22	6165.92	9612.83	9014.41	8933.02
M278.63964T14.03_1	278.64	14.0278	-	-	[M+Na+K]2+ 495.33	16045.6	17042.6	14811.8	13554.3	16131.2	13529.2	20120.3	15390	17532.2	16157.2	20958.7	17790.1	15898.8	15854.7	19785	15231.3	18560.4	13715.4	17084.5	12534.4	13272.3	16472	12658.5	16151.8	17952.6	19470.7	20910.5	14915.3	14443.8	18753.3	14683.1	15329.8	13899.5	20647.4	13789.6	14475.3	20337.2	17992.3	19495.6	17435.7	15246.5	17425	18284.9	18654
M278.98251T8.39	278.983	8.39459	-	-	[M+H-H20]+ 295.988 [M+H-H20]+ 295.988	7371.23	8649.24	8538.83	8614.92	8471.45	8961.77	7483.86	8488.57	8462.88	8601.78	9285.56	10080.7	10017.9	8692.11	8719.07	7972.78	8496.27	9233.26	10093.2	10234.8	10691.5	10396.5	8861.98	9806.63	8047.96	9978.75	9184.12	8855.87	9692.3	8025.35	9029.94	9670.25	8357.86	8290.16	9891.06	7411.6	8168	8646.05	7754.59	8823.11	9039.45	9151.12	8137.59	8608.06
M278.98269T0.92_1	278.983	0.924847	-	-	[M+H-H20]+ 295.981	8488.2	10305.8	10607.1	8928.87	8225.98	10246.7	10067.9	15243.9	11229.9	10013.4	6898.54	8692.96	9816.49	7026.22	10877.4	8827.1	10733	8243.28	9948.69	9841.47	9759.08	8147.62	8470.82	7460.13	9729.05	8951.36	10774.7	6799.29	9537.84	9170.36	10109.4	9491.22	12870.4	10591.2	10055.7	10714.3	10729.7	14637	9892.6	7703.57	8702.25	8424.34	11753.3	10926.8
M279.04773T0.92_2	279.048	0.924919	-	-		13220.2	14276.7	10931.9	10729	13669.5	9100.51	9508.89	14891.4	10118.2	14328.5	9797.49	10693.2	8496.7	9248.2	11339.4	9172.04	11490.4	14159	11750.7	11454.2	11876.3	14135.8	12280.9	12309.5	9932.22	13956	11994.8	14308.1	13473.8	11832.1	12363.5	13893.7	13052.3	13283.1	9956.98	10968.3	15080.2	16396.7	12499.9	12521	11407.1	12485.1	11764.9	11578.4
M279.6473T14.72_1	279.647	14.7172	-	-	[M+Na+K]2+ 497.346 [M+H+K]2+ 519.331	11980.9	13761.8	13061.9	11515.5	12004.7	9714.86	12313.6	10372	10655.3	12921.4	11830.5	12428.3	8489.45	10950	10907.7	8962.82	9906	9746.51	10101.2	9477.66	8844.09	10089	9849.1	13031.3	12058.8	12776.1	12342.3	10221.9	9275.65	13785	11088	9618.41	12397.7	13184.8	10569.5	10081.9	12388.5	11974.2	14778.6	12974.8	11644.2	10814.9	12276.3	11047.6
M279.98861T8.39	279.989	8.38816	-	-	[M+2H-C5H8O4]2+ 690.009	3231.24	3728.33	3273.44	3417.58	3684.83	3007.56	2461.14	2479.18	2939.06	2938.78	2849.83	3654.31	4152.14	3529.25	3095.61	3623.66	3124.82	3017.86	2832.22	3407.35	3932.6	2697.43	2640.99	2858.33	2778.62	3541.11	2935.61	3105.57	3221.91	3263.09	2997.23	3741.37	3109.39	3139.81	3011.77	2539.3	3111	2680.74	3246.5	3056.7	2765.4	2978.22	4224.91	3176.15
M280.11574T9.34	280.116	9.34063	-	-	[M+Na]+ 257.126	12188.8	33054	30674.4	15065	30391.5	23313.2	23136.2	21933.9	20109.1	24333.8	25848.3	19638.3	4241.03	33076.6	13875.2	12160.9	21158.5	22073.2	29877.8	16875.3	14260.4	10677.6	23357.3	-789.532	15100.2	24683.5	15181.4	24248.2	28593.4	25128.8	16210.4	17785.4	22112.1	13314.7	24754.1	34356.8	23024	22491.2	19618.1	16602.3	18312.4	14129.3	16403.4	21293.5
M280.13919T1.21	280.139	1.21213	-	-	[M+Na+CF3COOH]+ 123.152	140182	200686	147780	131052	128224	105396	123572	166616	136173	151662	174687	103986	143481	135230	144456	128784	168375	133117	140651	125435	111522	71774.6	120489	188361	144078	136059	217931	76216.5	121853	143448	144789	170121	135023	164568	108320	89689.8	113914	99714.6	124787	118430	223682	183315	136437	64317
M280.19092T15.17	280.191	15.1716	-	-		5935.3	5256.27	5712.9	5677.8	10050.6	6175.54	3201.61	7251.05	10055.7	6829.8	7597.42	5588.84	5504.57	7226.28	6257.93	8021.3	5096.74	4251.04	5238.25	3257.91	4533.31	4238.74	6237.66	4591.31	7196.9	6182.39	10424.3	6738.68	4986	7744.38	6520.87	6667.83	3872.76	8720.61	5656.4	5291.74	5925.54	7936.94	4758.53	4457.86	8446.97	5030.48	9428.92	5560.87
M280.26354T14.69	280.264	14.6855	-	-		3198.52	2904.35	4338.49	2961.14	5787.39	3983.98	9575.06	4416.66	4268.67	6109.58	6202.37	7588.06	7035.73	3167.21	6468.07	1217.18	3904.19	4862.05	5848.39	2780.86	4084.9	3461.37	2049.63	3150.66	4816.87	4071.09	3541.71	1792.32	2666.2	2326.45	1877.59	5100.24	3362.72	2659.49	1310.64	1076.34	1236.76	1706.33	3909.93	4530.84	1745.31	2016.91	7286.55	4479.58
M280.26358T17.31	280.264	17.3112	-	-		15310.1	11887.2	6307.25	10623.9	15351.9	15064.6	47115.6	11162.3	11670	20099.9	19641.7	44176.1	25983.8	3270.69	34009.6	4214.48	17037.3	11559.7	28508.2	2406.96	23734.2	1535.23	15991.4	59295.8	5574.63	18576.6	24253.3	72823.2	56354.6	10456.7	11859.2	21843.3	3298.71	6819.68	6630.52	12781.7	9964.32	8886.42	15782.5	15156.9	24878.9	3363.77	37250.3	19081
M280.26362T17.6	280.264	17.5977	-	-		11245.5	9225.99	11472.1	10649.9	15623.8	16059.9	43508.8	11845.8	11917.4	17050.4	15481.3	35393	27836.8	5090.56	28039.8	4855.34	18244.6	13715.8	26755.6	5291.97	24645.9	3044.46	5132.14	10607	6089.69	20612.1	16515.8	6687.9	12554.7	9106.52	8504.19	13016.7	6015.09	4871.27	2211.87	1218.93	5670.64	6365.94	7963.33	10590.2	9401.79	5090.86	34018.7	21733.1
M280.2636T17.45	280.264	17.4519	-	-		17135.8	12389.3	15352.5	17883.7	26883.9	29465.4	80527.2	17770	18534	25217.5	23063.3	63091.6	44098.6	8438.91	51497.7	6198.37	31497.8	19736.3	43018.1	4526.75	39248.7	3263.25	5148.96	16804	4790.28	32677.8	22913.6	13892	20397.6	13593.5	12246.6	23577.9	5129.86	2839.06	2073.28	2730.5	4693.78	6574.3	15092.3	18274.7	13630.6	7829.77	56725.6	31527.8
M280.65501T15.62	280.655	15.6196	-	-	[M+H+K]2+ 521.344	5753.42	4373.84	4976.3	5445	4542.43	3914.23	3702.33	4729.05	4294.22	3593.91	4063.07	4219.31	2763.97	3525.08	3418.28	2961.97	3174.73	4073.41	3391.04	3905.37	4917.18	3797.67	3070.03	3974.98	4940.62	6064.12	4601.98	4889.25	4153.53	3969.85	3916.6	4195.62	3916.61	4280.27	4347.08	4321.48	5577.05	5303.11	5063.98	3512.46	4785.71	5388.18	6005.17	6638.37
M280.99306T0.74	280.993	0.73541	-	-	[M+Na]+ 258.006	10325.1	11547.9	10978	8737.85	8590.71	11398.6	9063.78	9248.22	10091	10528.4	8898.21	10827.5	11417	12039.7	12756.3	11009.3	11568.8	11231.4	11150.2	10537.5	9770.54	11032.6	8865.6	11021	10914	10048.3	9617.41	11155.4	10665.2	9610.41	9743.58	8641.61	9857.38	11107	8751.18	11250.8	10366.4	10285.8	10610.3	8847.02	11405.8	11814.1	9850.94	11124.4
M281.03497T11.15	281.035	11.1506	-	-		6375.12	6980.93	7312.65	3565.85	6839.19	6151.31	6217.7	7068.72	5786.98	6919.14	7207.83	5810.69	6915.43	4979.51	6421.52	6181.12	5498.01	8266.66	5496.05	5982.59	4930.97	5158.17	3959.62	5828.56	4661.92	5813.68	6729.6	7172.67	6127.52	6122.8	6772.82	4673.86	6097.07	5539.12	6044.55	7270.58	6915.87	4340.68	8745.44	6662.4	6302.55	6292.98	6103.67	6638.69
M281.05838T9.19	281.058	9.18951	-	-	[M+H]+ 280.054	3401.46	3182.66	3884.11	2232.87	3997.45	3530.63	4087.77	5088.5	4350.05	4530.87	3661.85	3909.86	3572.61	4390.82	4654.94	2182.36	3333.91	5574.9	3195.72	4393.13	4337.57	1381.08	4107.81	597.154	1777.24	4893.26	2748.31	3120.03	2917.95	3507.29	3486.47	3403.71	3163.38	2600.67	4437.43	3858.51	3047.34	3043.19	3387.53	3923.55	3886.37	3008.4	2018.17	3570.36
M281.13076T14.93	281.131	14.9321	-	-		11910.9	14998.7	11111.6	10560.2	11881	8643.55	9998.76	9004.58	11503.4	12888.9	11642.3	13177.7	7182.54	10497.5	12493.5	11464.2	10286.6	9446.79	8536.25	8583.29	8763.66	12259.4	8390.25	9662.78	10550.6	13250.3	13088.7	11849.7	11054.9	12781.4	11387.7	12562.1	10771.1	14012.5	10688.2	12519.4	14214.8	11484.5	12400.3	9427.19	11547.5	12843.4	12003.2	12329.7
M281.13527T11.81	281.135	11.8075	-	-		5474.43	7555.52	4175.64	4733.37	4721.73	2852.58	2076.02	5912.12	5135.69	7012.76	4446.07	3516.33	5483.57	2465.75	5305.34	7261.84	2954.57	4605.05	4758.94	3911.22	6567.7	4854.49	7227.76	3328.74	5113.72	8864.4	2439.14	7082.69	3758.49	5441.04	3660.15	2117.57	3325.43	3503.27	7678.71	5560.53	9206.01	5217.63	6057.04	4027.95	3755.59	5602.08	6836.54	5667.72
M281.17487T13.07	281.175	13.0728	-	-		14255	10200.2	12220.9	10153.5	9794.32	11457.5	7092.96	10031.4	9696.51	13217.6	10628.7	12914.8	6811.53	6198.79	12838.9	18410.2	11375.7	9684.94	13736.1	9188.2	13326.9	11698.8	12503.7	7023.05	16987.7	19823.9	12894	9406	15386.6	14941.1	14416.8	11081.6	16255	14702.4	11777.3	16969.7	12230.1	15214.1	17451	12549.3	7988.27	16494.6	17689.5	12592
M281.26693T17.43	281.267	17.4319	-	-		3488.56	3248.73	2870.47	3694.37	5476.29	5048.18	17428.1	4852.24	3478.77	5488.69	5367.06	10973.4	9859.78	1341.92	11528.8	1775.57	5854.79	4359.04	8893.04	1884.23	8543.57	1126.57	4430.83	3711.34	524.708	8239.22	4198.5	4265.88	9975.7	4125.41	2511.62	4329.02	1831.37	1719.78	1114.98	2501.42	1084.64	1825.99	3346.62	3899.7	3379.98	1260.19	10546.5	6471.82
M281.6322T14.93	281.632	14.9306	-	-		3472.03	3737.21	3571.45	3457.45	3141.37	3590.2	4217.63	3237.77	2899.38	5221.28	3697.37	4628.5	2078.7	2747.61	3097.44	3398.59	3094.04	3908.55	3543.37	3250.51	3009.61	3811.15	2975.47	3622.62	3997.71	4866.7	4218.28	4886.56	5820.57	4487.87	5485.73	4914.66	4848.64	4555.53	3935.68	4949.19	5660.19	4943.04	4355.29	4317.8	5437.06	6744.74	4729.79	5460.98
M282.13534T11.81	282.135	11.8074	-	-		12361.3	19517.4	10789.6	10902.3	15555.3	8867.97	3041.03	14683.9	15157.7	17816.9	10890.7	11132	14583.1	5182.01	15529.6	19117.7	7272.91	16906.7	15880	14873.9	20817.2	15595.7	16247.2	7066.67	16028.3	20959.8	9067.59	18720.3	10087	17347.5	8304.35	6380.61	14590.3	14490.5	21426.7	15112.4	19706.3	13861.7	19053.4	14059.3	13249.7	22119.8	19694	19605.3
M282.14161T14.78	282.142	14.7828	-	-		7691.11	15446.7	11196	9637.57	11881.7	18890	12421.1	17089.1	7890.17	16618.4	12345	10699.7	12056.9	11039.2	11564.8	14982.6	10893.6	9414.61	11181	9020.27	10104.8	7612	12142.7	10392.7	11258.1	7533.01	7402.04	9329.44	12056.1	9356.09	7230.36	8322.77	11199.5	8906.24	6804.62	10077.5	10642.2	10880.5	9499.78	8524.35	6720.19	9892.04	11499.3	9588.23
M282.27911T18.24	282.279	18.241	-	-		381167	263841	431627	337177	545380	576286	1.64862e+06	466115	482895	545269	592531	1.36697e+06	968383	203204	1.12934e+06	196044	580079	472422	836187	188212	764747	132551	165084	367455	199353	626502	594518	274704	457313	312959	266678	400557	233697	86817.1	86844.9	13339	254643	211101	424208	437523	386989	196960	1.12982e+06	831094
M282.27918T18.41	282.279	18.405	-	-	[M+Na]+ 259.291	90335.1	63986.5	115115	65249.8	115191	112085	268843	81487.9	118334	135714	115904	233940	171499	57531.3	172518	28637.8	121385	119638	160865	40033.7	166739	42198.7	33762.9	87929	53002.2	147586	120412	52414.9	76697.2	52194.3	54008.8	123460	52911.8	34027.8	16193.9	7153.64	47645.6	28868.5	74392.9	94565	74662.3	48106	269008	193546
M282.63383T14.94_1	282.634	14.9356	-	-		21569.4	22119	20133.4	17660	23208.6	23743.2	23455.7	20869.5	20212.1	25832.4	22381.3	24912.3	16475.4	22902	27981.5	24509.2	22293.9	26549.8	25880.5	20302.9	22702.7	27558.4	18120.1	22536.3	28127.4	27758.5	24846.9	23982.9	28239.7	26748.5	26124.9	24190.1	24377.9	25871.3	19235.1	24658.5	31076.9	27202.1	25586	19746.3	22645.9	28420.9	23430.7	27989.6
M282.63695T11.81_1	282.637	11.8124	-	-		4111.71	5735.22	2513.26	4184.66	4207.69	2802.89	1338.69	2739.34	4894.21	6041.62	3216.92	3039.6	3701	968.881	4460.77	6912.1	3262.97	4670.41	5096.48	4961.44	6299.16	4830.25	7581	2196.21	5120.88	6748.06	2979	5978.22	2845.87	5767.2	3127.62	2040.12	5464.09	6184.62	6919.9	6415.77	8390.98	5178.66	7871.77	5925.1	4848.21	7324.69	6951.07	6538.6
M282.65142T15.98	282.651	15.9835	-	-		3293.31	3342.23	3730.15	5619.31	4171.67	5435.32	4385.64	4128.81	4190.36	3463.6	4117.41	3392.47	3556.21	4273.56	3766.27	3493.85	4214.65	1933.38	3523.86	3963.2	3298.92	4446.52	3941.66	3583.78	3959.53	4375.7	4949.26	3743.41	4425.44	4326.92	4319.6	5399.35	4656.73	3765.87	4377.41	3882.25	4608.2	4905.67	4587.91	2971.68	3499.3	4183.58	4742.19	4027.28
M283.01127T9.05	283.011	9.05155	-	-	[M+H-H20]+ 300.018	9607.33	8817.76	6708.58	3986.34	10629	8051	8669.89	4797.64	7449.92	7735.87	8977.8	6111.23	10195.7	7404.09	5845.84	4570.87	5527.53	8484.12	9051.97	4271.46	6149.25	4360.19	6447.55	7934.3	5115.7	6692.09	8194.34	17117.6	7381.27	5411.44	6987.31	5168.69	5011.46	9961	5719.17	6624.17	8266.99	4471.48	4473.71	3922.89	4937.59	5054.52	3498.19	6800.9
M283.13365T11.81_2	283.134	11.809	-	-		6296.48	9604.67	3919.35	5062.14	6320.81	4172.08	2666.39	6282.52	6053.27	9260.43	4356.96	4832.95	7511.89	3834.12	6392.13	8954.38	3734.76	6252.84	7005.67	6265.69	10068.1	7598.13	9287.21	2978.15	7203.34	7534.93	4236.06	7324.71	4954.48	8406.48	4089.18	2658.28	4840.14	7408.76	8786.22	7069.36	11265.3	5499.23	7574.51	5392.74	6166.06	10164.1	9586.86	8255.67
M283.13586T14.94_2	283.136	14.9356	-	-		8264.66	8823.72	6522.35	5286.03	8135.67	8598.04	8875.88	7643.74	8444.53	8798	7200.05	8496.71	7171.22	8037.07	9239.06	8462.38	7784.7	8421.19	9572.77	8250.51	7457.75	9155.81	7299.98	8094.69	12158.6	8362.54	10885.1	10274.2	9570.01	10469.7	9819.49	9328.64	9822.02	9650.25	7601.91	10010.5	11869.1	9515.55	10272.7	8609.1	8073.11	9480.31	8914.22	10254
M283.28257T18.24	283.283	18.2427	-	-		85510.3	57578.4	89951	67147.4	112601	121930	356488	101551	105998	110153	130411	310025	218383	40771.2	243833	39379.6	129194	106717	175277	32878.3	168103	22671.1	31405.7	84580.9	38542.1	134087	132824	58858.1	93219.1	60724.1	55442.1	82079.4	44838.2	18555.3	14989.5	860.432	46473.7	41069.6	93503.9	88285.4	78229.8	41611.8	260367	181575
M283.2826T18.4	283.283	18.4046	-	-		17252.2	13502	23510	13851.3	23538.7	23289.4	56067.6	18483.4	25992	26815.7	23716	54725.3	38691	14461.9	36976.6	6128.81	25608.1	26033.7	36518.3	8716.94	37960.1	10075.5	8071.76	18505.4	10024.3	27522.8	25495.9	12670.8	17601.5	10787.3	12838.6	25237.4	11621.3	6308.07	2652.02	1223.46	8826.04	6301.91	13962.3	18531.8	14282.5	10293.6	59307.9	42510.3
M283.63209T14.94	283.632	14.936	-	-		8264.29	10009.4	8379.59	7278.37	10046.4	11158.7	8306.21	7728.36	7195.07	8315.95	7980.7	9450.67	6560.68	9394.34	8982.78	10041.2	8832.3	10888.5	7767.82	7003.59	7418.52	10741.6	6376.94	8464	9035.01	9389.11	12451.2	11035.9	10993.1	10449.7	10478.7	8934.76	9332.56	10438.4	7293.32	10268.4	11689.1	10827.5	12582.4	7506.25	11178.2	12393	8822.34	11728
M284.13477T14.97	284.135	14.9678	-	-		10489.2	9891.28	10789.1	8429.41	11261	7904.63	10220.4	11795.2	10282.5	13256.5	10019.3	11262	7968.76	11614.5	11813.3	8301.8	8470.37	7989.04	9712.73	6999.59	9717.46	8766.39	9291.41	10519.4	11711.3	10648	11105.6	9598.88	9698.85	10179.2	8835.38	8163.64	9548.84	9442.77	9174.61	8301.67	9428.29	8738.82	10516.4	9087.07	7835.67	8699.37	9814.78	8861.27
M284.13928T14.12	284.139	14.1197	-	-		3520.36	5648.38	4407.69	2225.9	3367.91	5266.67	4373.85	5691.33	3666.18	3527.55	4456.35	4371.99	4387.26	4967.76	3202.37	6844.5	4896.27	2965.18	5453.01	3084.82	3833.14	3486.36	6251.58	3726.49	6754.19	3410.47	5245.64	2035.55	4115.88	3134.51	2080.19	4005.09	3857.2	3977.46	3189.74	3111.73	3821.72	6152.06	4413.69	4189.88	3099.5	4741.8	5307.16	3647.47
M284.13987T15.24	284.14	15.2386	-	-	[M+3Na-H]2+ 500.314 [M+2Na]2+ 522.294	4486.88	2558.9	2300.69	2395.83	3195.3	3564.6	4150.94	3716.64	4581.23	2425.35	3077.97	3991.55	3496.33	2903.68	3053.82	2844.55	2599.64	2455.9	2894.42	3058.53	2865.56	3559.1	3277.28	3081.6	3685.52	2670.75	3029.1	3253.38	3474.86	3160.53	3253.86	2769.26	3930.33	2799.04	4186.73	3578.8	3358.79	3338.29	3913.93	2858.7	2815.33	3544.46	4206.7	5112.64
M284.43241T0.74	284.432	0.736872	-	-	[M+H-C3H2O3]+ 369.419	4746.48	3443.44	3537.36	3667.86	2602.06	3756.01	4859.32	3434.06	3388.87	2660.09	3700.19	2999.32	4164.05	2929.76	4120.7	3777.99	3812.81	3410.65	3365.6	2431.82	4918.15	3762.94	4652.64	4633.97	6401.29	4916.44	5192.45	3634.72	5392.3	4361.93	4297.85	3999.23	6609.45	4840.39	4202.47	5306.83	4458.89	3942.65	2996.19	3411	3825.76	4205.62	3874.74	3370.35
M284.63127T14.44	284.631	14.4406	-	-		9262.13	7534.9	6224.16	4387.33	5648.81	6542.53	7551.76	6327.67	5251.66	5777.75	5092.09	5742.26	6111.67	8449.98	10215.7	8561.85	5608.23	7731.08	8513.14	3670.81	4894.2	5810.78	5165.3	5868.38	7748.96	6679.54	7079.44	6453.67	6896.83	6899.1	4847.52	5911.86	6277.04	6569.99	6291.67	4944.44	7328.62	5519.37	6723.33	4705.73	5400.83	6249.34	4780.88	7776.7
M284.63154T14.26	284.632	14.2644	-	-		13262.2	8132.32	8920.49	6545.03	11702	11493.7	14642.2	9612.17	9692.98	12149.3	7617.72	12133.2	11473	12667.2	12896.2	13143.9	11501.4	8589.44	11921.9	8981.01	10493.2	12470.9	7311.61	10276.6	14189.8	9048.39	10909	9495.49	9272.65	11660.3	8200.3	10545.3	7860.04	8517.58	7975.74	8192.84	10138.1	8915.26	10380.8	7382.34	8680.71	10389.1	9167.87	12004.8
M285.02947T9.19_1	285.029	9.18866	-	-	[M+K]+ 246.07	5699.26	6537.5	6508.14	3615.97	7449.54	7273.66	7084.64	6706.21	6106.18	7691.29	7077.87	7814.59	5971.51	9110.54	7684.1	3528.23	6123.38	9807.28	5994.14	9175.29	6357.3	4176.49	6555.29	537.866	2933.08	6121.33	5742.92	6186.35	7286.57	6318.54	6369.09	7422.76	6911.02	4868.36	8242.7	7086.71	6958.51	7340.67	6137.73	6063.51	8413.38	7974.67	5479.2	6911.28
M285.12421T14.03	285.124	14.0319	-	-	[M+Na]+ 262.131	4741.33	4906.87	4227.57	4186.71	3104.86	4452.4	2470.2	5622.48	4750.89	4052.59	5007.84	4764.42	3997.71	4272.26	4812.52	4383.51	4096.91	4244.5	3770.07	3208.95	3060.57	5319.69	4300.91	3683.34	5365.44	4510.07	5037.08	4600.5	3368.58	4655.26	5664.02	4716.85	4452.32	5095.13	3665.6	5321.6	4612.09	4395.21	5645.57	4861.02	4310.6	6441.04	5876.12	4464.97
M285.13329T10.74	285.133	10.743	-	-		3518.94	3557.24	3300.03	3333.52	4423.83	4797.35	2656.76	3436.03	3641.88	3347.7	4041.59	3451.91	2306.25	4060.72	3759.54	4137.8	3680.34	2349.17	3279.79	2143.52	3919.77	4160.33	3402.91	2003.87	4137.83	5493.82	3655.24	3578.15	4203.55	4782.52	3901.19	3450.31	4029.86	4157.88	3485.79	4980.39	3068.54	4187.16	5838.55	2790.93	3174.82	3846.57	2342.34	2928.63
M285.18098T9.18_2	285.181	9.18373	-	-	[M+Na+NH3]+ 245.164	5005.75	9216.6	11090.9	5272.72	6661.62	6800.55	8820.82	7152.4	4951.5	8042.74	9187.29	7324.51	3381.75	10179.9	8230	5075.94	7867.28	12149.4	11083	7999.51	8543.09	4653.9	5856.15	-463.804	4858.89	9598.14	6158.25	8913.25	7457.23	9566.31	7744.12	10509.3	7465.85	5076.52	9463.4	9667.81	7733.49	9082.33	8168.26	7828.22	9031.87	8594.73	5829.53	7620.53
M285.22105T18.2	285.221	18.2029	-	-	[M+K]+ 246.258 [M+Na]+ 262.232 [M+H]+ 284.214 [M+H-HCOOH]+ 330.22	5487.44	2711.28	7361.11	2423.74	6193.14	4769.6	3683.74	4667.02	5160.4	6261.77	4033.49	4963.31	3208.7	4115.33	4389.9	5209.45	4640.26	3661.1	5758.38	3939.46	6638.98	6467.81	4248.63	4298.41	6891.94	5652.25	5787.88	7101.3	6721.43	4695.22	3578.14	1839.72	4201.65	5119.33	4436.26	7299.18	3860.62	5156.2	5244.48	4611.92	5385.07	5384.26	2149.66	3617.63
M285.62968T14.26	285.63	14.2642	-	-	[M+2K]2+ 493.321	5169.82	4580.94	4882.99	3048.4	4810.56	4290.48	6223.62	3737.06	3201.71	3848.74	3737.5	5006.27	4543.93	5750.5	6190.09	4272	5308.49	3309.46	5116.28	2909.59	3509.45	5422.32	3018.61	5109.39	7284.61	4555.83	5346.49	4848.33	4209.03	5418.48	5156.88	4290.23	4895.09	5255.55	5364.83	4306.03	4145.7	4087.19	5143.12	5013.76	6875.13	5604.99	4227.49	6710.01
M285.639T15.24_1	285.639	15.2395	-	-	[M+2Na]2+ 525.298	8592.36	8508.21	9947.41	6200.2	8651.9	9691.95	11396.4	9874.62	9956.72	10233.8	8215.9	10671	8948.86	10857	9497.62	9302.11	8591.8	8973.3	9256.59	8064.78	8954.49	9989.09	9522.16	9439.83	9553.58	8201.5	10627.9	8265.84	10618.8	9218.88	10095.8	8838.49	9256.71	9177.19	9602.51	10253	9888.76	10971.3	9972.2	11063.3	9056.62	9483.69	9324.98	7993.78
M286.12267T14.03	286.123	14.0286	-	-	[M+2H-HCOOH]2+ 616.233	84411.6	81047.9	69981.9	64292.3	64362.7	65400.7	71911.3	57709.3	73829.6	69003.2	76349.8	76131	60335.1	79563.4	82011	65384.4	67137.4	57051.5	67656.6	60244.8	54311.6	66361.1	54816.6	66077	77134.5	80225.1	92554.8	68654.4	70629.8	86338.4	74556.9	68214.2	82219.6	85727.6	70014	76246.8	93669.8	74724.8	86605.6	78235.4	70606.3	94481.4	88459.5	79477
M286.13209T14.72	286.132	14.7204	-	-	[M+2H]2+ 570.249	5199.09	4498.66	5779.9	5253.62	5875.04	3435.39	5521.8	4804.79	5555.99	6499.59	5989.54	4729.2	3987.68	4824.54	4431.54	3484.31	3945.94	4569.88	4455.92	3704.63	3952.41	4814.1	4138.05	4412.34	4884.3	4599.62	5119.71	4105.93	4333.72	5510.15	4495.24	4190.14	6271.53	6606.73	4895.43	4606.12	5308.54	5180.54	6037.75	4860.26	3905.04	5206.38	5598.74	4923.9
M286.1407T15.24_2	286.141	15.2377	-	-		2139.72	2419.02	2313.78	1403.73	2586.94	2691.51	2857.32	3267.32	2242.88	2822.97	2079.17	2152.04	2216.11	2605.33	2489.92	2879.16	1516.62	2230.6	3275.86	1886.43	1850.1	2093.65	2639.22	2153.03	2659.89	1795.69	3007.64	2102.86	2059.28	2285.14	1976.58	2707.38	2343.1	2330.64	3415.09	2641.41	2224.79	2526.76	2914.13	2665.06	2192.98	2387.79	3242.3	2649.29
M286.22906T18.2	286.229	18.202	-	-		52350.7	32403	55826.7	19907.9	59486.3	59014.7	41902	55434.4	64382.8	62679.8	30928.3	35408.4	34087.8	42945.7	34220.5	37022.6	35002.2	32382.9	51769	36810.5	58948.4	50627.3	51067.1	44510.3	73046.6	42130.6	50399	57895.2	55569.9	49728.1	51625.7	20253.5	49581.3	62296.3	54800.5	60206	47801.4	48714.3	47616.1	52005.3	58196.6	60809.5	31314.4	47247
M286.62448T14.03_1	286.624	14.0284	-	-	[M+2K]2+ 495.33	28960.4	29979.6	25270.2	20193.1	24269.9	22316.5	27151.5	22861.3	26658.2	23558.2	25682.5	26929.4	22020.3	22838.6	25960.8	22130.9	22168	18771.8	20899.7	14788.9	15667.2	25407.1	18687.6	20386	26227.1	26223.7	32983	27116.3	20675.7	26304.9	21233	23409.4	27900	27928.4	26025.1	23572.5	31201.6	30510.1	31330.6	25788.3	23757.8	27744.4	26659.8	26628.2
M286.63716T15.24	286.637	15.2387	-	-		4500.38	3023.14	3973.04	3927.48	3553.06	4567	3965.64	3846.52	4291.26	3324.97	4154.85	3550.5	3967.2	4993.57	3842.2	4378.08	3636.08	3845.91	4179.76	2570.64	3453.87	3335.57	3703.09	4006.33	4789.63	4105.75	4070.53	3526.93	3754.34	3919.77	2933.53	3031.08	4097.89	3823.16	3526.94	3704.41	3560.23	3629.75	3835.77	4567.01	3225.9	4790.12	3642.01	3391.61
M287.1309T14.72_2	287.131	14.7182	-	-		81612.9	83591.4	88691.9	75319.9	73403.8	68939	89732.7	77819	79214.9	92586	99254	92288.1	75527.6	81994.8	81724.5	76667.7	70582.2	73993.4	75459.6	68571.7	74421.3	80335.6	65490.3	89957.5	88247.8	92825.2	99974.5	85665.3	80314.9	93519.5	79497.1	78114.3	88653.2	96813.1	88160.3	75042.9	99761.9	93244.5	113716	88933.5	85529.2	94325.4	87660.8	103226
M287.23274T18.2	287.233	18.2039	-	-		13713.3	5797.2	13591.9	5022.58	12604	14379.5	8402.92	14207.9	12652.4	12513	6603.13	7448.76	9160.24	8252.17	9570.11	10936.5	7773.45	7603.48	11844.6	6536.92	13417.2	9889.01	10278.3	11194.3	15281.1	9496.41	11689.2	14754.8	12257.8	8811.92	12368.7	5653.96	11246.6	15406.4	11014.5	11555.7	9897.34	10453.1	10398.6	11108.9	9979.51	12379.1	6257.84	10114.4
M287.62601T14.03_1	287.626	14.0284	-	-		167976	171140	127230	101218	125149	146129	151071	113744	142047	127778	119290	142311	175329	184857	194237	160081	172531	124223	172742	136668	135789	155798	125953	150272	152979	144379	175369	128613	122136	147781	122718	109034	121157	143018	119243	119319	149416	129594	132340	133068	118671	143184	138347	149322
M287.62606T13.84	287.626	13.8365	-	-		22683.3	17310.5	13828.7	15356	16457.7	19171.2	17843.7	12038.8	20148.5	17336.2	17007.2	17336.6	23449.5	20179.5	23315.3	23781.1	19411.4	15945.6	23243.9	15786.4	15321.9	25175.9	14597.8	17215.8	21329.5	17582.8	21969.1	12567.2	12740.8	18930.3	13492.4	17096.8	17725.2	20079.2	15765.7	11522.7	20439.4	22784.1	20010	19710.7	18378.2	22148.7	23049.2	22839.7
M287.63253T14.72_1	287.633	14.7164	-	-	[M+2K]2+ 497.346	32446.3	33804.7	30775.4	28611.2	29515.1	29348.4	32674.6	26864.8	31349.7	35639.2	34248.7	34266.9	27320.3	32344.6	31698.3	27665.2	26302.2	25820.7	29778.4	22709.3	25778	29739.2	27825.9	35404.7	34510.1	33851.6	40166.9	32326.7	28812.7	32803.6	27863.1	31394.4	38888	36392.4	28108	27396.5	39001.1	35484	39073.1	31552.5	33164.3	36907.5	29589.4	29684.2
M288.12762T14.03_2	288.128	14.0277	-	-		44785.5	48665.9	39574.3	34527.5	37131.6	47384.9	45828.8	32316	42055.7	41409.2	36378.3	41353.9	53466.7	53174.4	60283.8	47037.8	49879.7	36470.5	53532.8	44287.6	42739	52061.4	38652.9	41513.8	48104.2	44762.2	54966.9	37231.4	40428.7	44120.5	34603	33481.6	40767.5	45591	32267.3	38629.8	46135.6	40781.7	47610.6	39747	36424.4	45380	40018.5	46484.3
M288.13378T14.72_2	288.134	14.7197	-	-		7003.8	7977.18	7917.99	6953.3	5340.06	4848.63	7285.44	5112.48	6832.41	6444.83	5941.6	5658.36	4601.48	6049.72	5815.76	5152.67	4400.04	4523.5	6042.05	4474.69	5018.66	5636.11	5745.62	5732	8550.28	7139.71	7856.15	6441.79	6084.52	6183.63	7052.44	6695.89	8906.63	8565.74	8350.5	6068.94	8786.53	7647.58	8298.23	6826.89	6778.55	8864.63	7472.95	8402.9
M288.13881T15.62	288.139	15.6192	-	-	[M+2H]2+ 574.268	69635.8	71430.8	69484.3	74875.3	71715.5	52901.2	67817.5	67564.8	68225.6	76093.2	65846.4	63921.4	50337.8	66154.1	65968.8	63488.1	66863.2	61870.3	54533.7	61262.3	67675.7	73092.1	59110.7	69902.3	74481.3	69834.7	76751.9	65197.6	72885.8	72321.2	66947.4	71380.5	67640.2	75908.7	67987.1	68406.7	79495.1	73645.6	84827.2	64585.1	68202.8	73547.4	73518.5	73860.5
M288.13888T15.38	288.139	15.3796	-	-		18839.6	18094.4	18931.4	22764	18969.1	15497.5	17239.9	16876.7	19921.5	21001.1	19276.2	18322.8	11368.1	15748.5	18322.1	16242.5	17539.4	18907.8	12227.9	14056.8	15992.2	20565.4	14153.4	19557.3	23001.7	22957.6	20387.5	20592.2	20342.2	20761.5	18924.1	21829.3	20712.5	23176.6	17536.8	20245.5	23298.7	21306.8	29756.8	21195.9	21729.8	21706.3	20498.5	23246.2
M288.13893T15.78	288.139	15.7759	-	-		19570.1	15673.4	18440.7	15093.1	16028.5	10144.1	13264.9	17144.1	17320	21380.2	19753.8	16979.5	12741	17215.4	16645.9	15324	11485.7	15019.5	13492	15412.8	14227.4	14769.7	12923	13898.3	21095.8	17321.7	17079.8	16387.2	15388.7	17675.9	15239	16108.1	16197.2	16235.8	18715.4	17498.1	17547.2	18075.2	19590	13985.5	14199.3	18292.9	22552.4	17697
M288.56853T8.4_1	288.569	8.39719	-	-	[3M+H+K]2+ 179.058	5808.43	6662.99	7153.23	6608.83	7277.19	6699.6	6158.37	6955.46	6791.37	5368.99	8456.88	8054.4	8143.65	7461.23	6885.86	8382.42	8361.03	8030.48	7187.57	7092.83	7254.58	6654.5	6589.97	7287.84	7980.31	8194.89	8564.05	8434.6	9351.16	9084.08	8878.4	7973.47	7289.58	8378.97	7628.79	7799.71	8067.74	7116.5	7059.32	7722.36	5900.63	7268.8	8705.5	7028.7
M288.62428T14.03_1	288.624	14.0276	-	-		72732.3	64434.8	51524	47451.7	54101.2	69222.8	60760.9	50642.4	66029.3	52218.4	58523.6	58030	78493.1	76567.6	92269.9	74118.4	75323.7	55902.1	82126.5	62882.5	64184.7	69739.5	57262.2	63813	70893.6	69946.1	80679.2	56812.7	55169.5	67962	53843.5	50583.4	57927.8	60628.8	50724	50711.8	68176.8	56055.2	62882.2	54946.2	52109.7	64434.5	53821.1	58747.3
M288.63383T14.72_1	288.634	14.7182	-	-		229482	228278	207715	185574	198747	264416	266169	223824	246700	242807	239584	249006	271639	283309	294912	243882	242747	229346	267729	222422	239297	242615	226158	271845	264057	252108	277590	225334	222599	239683	227301	213633	227942	246685	207663	207501	248459	231064	271391	237717	213652	255321	225056	254781
M288.63408T14.51	288.634	14.5077	-	-	[M+K]+ 249.675	51614.4	45368.2	46883.3	36433	40954.1	51582.2	59603.5	42545.8	51165.8	51950.9	50037.4	53835	51582.3	58189.3	60621.9	49650.2	53211.4	48264.9	55302.3	40819.7	47372.3	51377.6	47375.9	67043	55093.8	58007.5	54246.1	38113.1	44690.2	46635	39322.2	34962.3	46638.8	49517.3	37960.7	35321.2	46733.7	47265.5	55480	46605.7	32739.1	45097.6	49368.8	52828.7
M288.64051T15.62	288.641	15.6188	-	-		25770.9	25592.8	25239.9	27162.9	26264.3	22059.1	23606.1	24791.1	24398.3	25413	24427.6	23544.6	16143.7	23797.9	23303.8	22658.9	22573.8	26009	19192	18674.8	21544.7	24775.2	21672.5	25363.5	28824.7	28841.5	24291.6	23513.2	27825.7	29065	26629.9	24368.2	29540.8	26853	21831.8	26138	30670.3	26229.3	29462.7	23157.3	25914.2	29876.9	28717.4	28019
M288.64052T15.78	288.641	15.7765	-	-		6173.32	6404.2	5703.39	5386.85	6353.05	4589.86	4568.25	6518.94	7153.73	5892.14	6289.46	5760.96	5449.87	6390.97	6506.89	6834.01	3340.77	6159.43	5203.38	4247.14	5579.65	6252.63	4755.05	9572.01	8216.6	7977.39	6829.52	7583.22	8092.35	7380.88	5673.48	5946.8	6501.32	5934.2	9947.86	5103.62	6555.94	5298.12	8982.11	5377.99	6339.65	6380.64	6780.8	7478.19
M288.92186T0.79	288.922	0.794625	-	-	[M+K]+ 249.957	9970.95	10514.8	134739	101417	153807	88769.8	116087	90361.6	119063	102375	121706	88882.7	14849.2	138095	128039	79637	94260.4	111684	97614.7	112827	138091	93060.3	122303	137431	130008	89192	92088.1	80089.9	112207	128748	90975.7	113293	83807.1	109942	124234	13668	-6893.7	129619	114960	113449	92383.3	14296.8	144003	138694
M289.00351T11.08	289.004	11.0842	-	-		3707.59	9101.13	7127.1	2111.81	11190.3	7120.14	3689.59	4905.4	8576.2	6643.61	8778.57	4392.53	5597.05	8292.94	5988.04	7436.61	5061.13	8220.98	5361.49	5063.88	4924.55	7387.07	7790.48	3806.88	9615.83	4794.55	5392.24	6689.08	4882.92	4661.48	5674.7	2594.89	6461.84	5886.4	4513.31	8218.17	5401.69	4502.73	3169.79	4148.19	3736.09	3041.75	5864.05	5688.66
M289.04834T11.15	289.048	11.1502	-	-	[M+Na]+ 266.056	6955.71	6604.16	4375.04	2006.73	4702.67	4804.73	4275.52	4937.6	4946.18	6983.49	6795.13	4679.76	4958.38	3759.52	5298.99	4589.64	5058.85	5082.25	4017	4763.39	3985.63	4752.13	3833.5	4473.58	6158.43	5075.1	5010.8	6516.34	4035.9	4254.96	3313.27	4177.9	5612.63	4237.95	3177.69	6021.77	5497.32	3407.52	5992.69	4014.69	4314.58	5604.84	4052.09	5777.34
M289.07007T8.39_2	289.07	8.39299	-	-		2254.84	2433.4	2096.38	1861.11	2231.47	2686.33	2533.35	2354.63	2519.95	2660.45	2865.11	3072.81	2043.53	2110.5	2075.6	2836.69	3172.42	2706.16	2367.62	2468.76	2547.45	2805.97	4577.02	2943.14	3356.29	3293.26	2693.94	3488.35	2444.58	2945.78	4129.87	3310.32	3313.61	3242.21	2922.93	3279.42	2958.94	3623.11	2737.91	2924.24	2561.86	2433.58	2930.88	2380.71
M289.0973T8.5	289.097	8.49883	-	-	[2M+3K-H]2+ 231.161	4341.4	13248.9	5039.63	2821.65	5051.29	4449.42	4680.29	5740.75	771.164	9090.92	6500.86	6799.2	4003.13	6164.67	7544.79	5842.42	9328.63	4497.67	5852.35	4789.31	5405.31	7129.34	4843.81	3693.41	2430.99	6388.06	10439.1	6220.99	12076.2	5740.07	7452.49	8028.76	6783.43	5912.61	1257.13	4733.16	11531.9	5540.47	3410.31	703.567	5882.85	9371.2	5131.95	7076.92
M289.13546T14.72_2	289.135	14.7182	-	-		74168.8	74637.4	64228.9	63602.7	63335	82758.6	79389.7	72711.9	69198.4	81456.5	76540	74162.3	82877.2	78826.3	93104.1	87162.5	78673.8	67898.2	86344.2	67101.2	72134.2	80365.2	67780.5	96122.8	83769	87987.5	90416.1	68010.7	67747.7	75256.5	73682.4	63578.6	72505	75177.3	66959.3	64244.5	75940.6	77894.7	94146.6	76819.7	64170.9	75666.2	70404	79723.3
M289.14887T15.67	289.149	15.6669	-	-	[M+K]+ 250.188	15882.8	10488.6	16029.7	14543	13915.5	12651.5	14722.2	16425.1	12942.3	15671.8	18285.3	13633.5	9902.82	12389.4	11933	12058	10383.8	3021.36	10479	10575.6	10714.6	12801.7	13151	12335.2	18884	12845.4	13934.7	13170.6	12894.1	13911.2	11803.7	11585.4	13848	15806.2	16187.1	15311.9	18743.5	16189.5	14602.6	15314.6	11195	13807.6	12600.3	10364.7
M289.6237T14.03	289.624	14.0285	-	-		11783.7	11400.7	11646.5	8339.06	8233	10525.7	8766.81	9402	10536.1	10184.6	10847.9	10818.4	12352.7	13175.3	14197.1	13535.6	13146.6	8758.96	13283.4	12095.7	10096.1	11515.4	7795.78	10927.6	12437.9	13831.8	12898.2	8775.46	9359.89	11939.5	8166.23	7917.51	9461.88	8900.69	8504.16	9288.83	11288.6	8867.77	9753.16	10262.6	8372.64	11171.7	7644.48	11139.8
M289.63213T14.72_1	289.632	14.7177	-	-		100952	103300	89862.8	75092.7	91604.2	115494	124029	98736	96394.9	112716	98179.8	108950	122877	117090	130063	111170	107471	97368.1	111639	94886.2	96141.4	101723	95853.4	113511	122691	106896	116013	98518.4	105509	96097.4	95172.3	93451.7	101677	102878	91222	78944.9	102394	108109	123319	102830	93353.9	107163	97373.8	120793
M289.64161T15.78	289.642	15.7751	-	-		75961.5	73438.7	79296.9	54131.9	72906.9	65138.9	67752	73223.4	81350.4	91279.6	73892.9	74267.5	56756.5	72414.8	69854.5	65128.4	45979.7	70928	67621.1	64282.7	69443.9	78054.1	66704.2	81789.5	94630.8	90066.5	83976.9	82825.3	84879.8	88197.2	74476.7	68724.6	76698.4	79841.7	99867.7	71746.4	83993.4	85759.5	86551.9	72882.2	61531.8	80163.8	92017	81935.8
M289.64163T15.38_1	289.642	15.379	-	-		66403	68701.4	60687.5	64380.4	75051.2	71034.2	68572.4	69051.7	79645.4	75387.4	60948.1	67342.1	41183	62610.1	74284.7	71228.2	68526	77238.1	63156.5	56414.4	64535.1	79766.5	64666.7	71472.3	78586.9	86224	71996.7	58888.3	70116	82742.9	63422.7	64948.6	64871.6	67050.1	56469.7	63213.1	72939.7	66418.6	89102.5	61379	69966.9	83586.1	69147	75536.8
M289.6416T15.62_1	289.642	15.6196	-	-		225318	222761	230225	235481	226433	231567	222174	229031	239663	236788	223174	217673	162326	202786	225732	227337	204279	219700	194204	197331	201819	228689	193951	220746	242957	239413	230560	231477	242198	245674	239660	225454	209974	245741	216037	231720	268515	238845	267025	205394	230847	265314	248609	246991
M290.04468T6.67	290.045	6.66546	-	-		7349.72	2330.43	4293.97	1742.16	5000.89	2662.72	3963.08	3800.63	1137.15	3949.54	-178.226	4250.82	2975.65	4601.07	3338.95	3069.1	4848.44	7926.18	2276.28	2611.28	2179.79	4213.16	3587.06	3474.82	2258.07	5695.9	2645.98	3046.45	8265.36	2955.96	2808.93	2779.72	3403.85	4350.01	4033.23	3592.97	3468.09	3318.27	2062.63	4041.6	2937.17	4143.33	2572.88	4802.99
M290.13332T14.72_2	290.133	14.7182	-	-		38026.7	37268.3	28335.5	26016.2	29033	36867.8	42558.7	28904	32269.7	38086.7	33258.9	36503.3	38898	38636.1	42925.2	34855	34838.7	32078.9	36930.6	30180.4	32756	34101.3	27032.3	42396.3	36209.2	33688.3	39993.9	27996.4	29974.6	31507	30045.2	26097.5	32868.9	37455	27288.5	29136.1	32614.1	34402.3	35900.3	30932.3	32807.5	36812.2	31950.7	39426.9
M290.13797T14.53	290.138	14.5277	-	-		13471.8	14831.1	13921.8	5898.33	10846.9	14080.2	15882	11842.3	8356.8	13886.9	13277.5	10671.7	12883.1	16886.5	16035.2	12705.1	10255.4	14428.4	13416.3	12140.1	12274.4	11940.7	12036.5	13729	16832.8	11744.5	13925	10733.9	15647.4	13099.2	13405.6	12793.8	12254	14208.9	13984.5	13313.3	17653.4	11505.9	15028.9	13878.1	12677.8	11837.6	14622.8	15636.2
M290.13908T16.65	290.139	16.6476	-	-		10463	8269.59	8494.55	4872.34	9284.27	4982.17	6873.21	8554.7	6641.18	8488.16	7643.12	6264.04	7072.75	7067.96	7908.27	9222.84	4766.29	11360	5913.06	7174.65	8755.75	7968.68	7682.32	8478.03	9379.99	7943.86	9020.03	11887.3	8140.6	7332.56	9108.04	9124.18	7797.82	7828.33	12629.8	8279.17	7919.49	7746.8	8219.23	7612.42	6669.61	7373.55	6567.04	6779.6
M290.14279T15.38_2	290.143	15.3812	-	-		24619.9	20697.6	21057.4	22758.7	23468.8	22886.9	22940.7	25312	23949.6	24045.3	16940.6	21221.5	13464.6	18597.2	22918.9	21777.2	19330.5	22187.5	18604.3	15906.3	19171.8	22224	18826	22365.4	20391.7	24165.7	20194	19122	25680.7	24187.4	20661.3	22443.2	21218.2	17579.2	17991.2	19261.5	25426.9	22089.6	27430.5	9062.41	21129.2	22240.8	25713.6	23361.7
M290.14321T15.77	290.143	15.7744	-	-		23008.7	23454.2	23159.2	16205.9	23145.9	19108.8	21914.7	22772.9	23857.2	29256.8	23941.9	22776.9	19411.8	23529	18427	19646.3	15790.2	24963	21048.9	21159.8	21002.7	23279.9	21019.6	22144.3	25411.3	24505.3	25258.6	23276.9	25995.5	25738.5	21975.1	21777.4	25785.2	22054.5	29827.6	23284.2	24615.8	26074.4	25925.2	18710.8	19941.4	26497.5	26785.8	23971.7
M290.14326T15.62_2	290.143	15.6206	-	-		79165.2	71643.1	78196.5	71293.7	75199.2	69596.7	73998.3	72906.1	79430.9	71123.8	67681.5	71325.3	53424.5	67737.2	70417.2	67791.7	69898.3	67819.1	58432	63514.1	67565.9	71692.5	61297	66324.2	74714.2	75747.5	79768.2	69264.5	77779.7	79579.6	77327.2	73093.9	73133.5	79394	72234.6	70900.8	84192	77588.2	82384.1	65784.1	72796.6	83385.9	80393	78962.2
M290.62315T14.02	290.623	14.025	-	-	[M+H]+ 289.618	13174.8	10057.4	12503.2	8556.96	9431.94	9321.46	9440.75	7886.02	7817.23	7500.11	7062.9	7670.82	5837.03	7218.5	9519.18	7179.77	6343.62	6239.37	6086.62	4931.68	2215.9	7573.13	2739.75	6256.7	7878.31	6992.31	7464.77	5085.45	6061.25	6730.51	5304.19	5891.72	7652.7	6793.42	6198.74	6517.35	8762.78	6137.07	8491.02	6925.58	8451.83	8294.2	9489.19	8836.08
M290.63165T14.72	290.632	14.7203	-	-		22040.2	20242.6	17073.9	17007.1	16326.3	19349.3	22634.4	20013.5	21376.4	20030.4	19661.8	20244	22025.7	21773	26110.5	20269.1	21734.9	18554.3	18454.6	17587.5	20491.1	18200.7	16854.3	25047.5	22985.7	23773.3	23258.9	15206.1	17473.6	19147.6	18073.1	15788	21427.7	17419.4	16342.1	14369.1	17799.8	20579.7	20705.4	18296.7	17659.4	19307.8	16307.2	19640.7
M290.6395T14.08	290.64	14.0833	-	-	[M+H+K]2+ 541.315	5816.23	6732.45	5367.31	4179.36	4610.32	4360.39	4599.55	4777.96	4891.28	4123.2	3572.18	6005.1	4395.99	3635.32	5372.1	4932.71	5752.21	5616.39	4637.79	3831.46	5747.48	5377.63	4940.37	5162.01	4822.83	5781.9	6914.06	6119.3	6479.69	5180.59	4430.31	4122.48	5988.3	6030.84	3834.49	4898.27	5804.47	5844.44	6945.07	3689.67	5520.02	6800.86	4914.83	4815.07
M290.63984T15.38_1	290.64	15.3794	-	-		28797.3	26818.6	27124.8	29517.6	27966.1	31958.7	31710.7	26530.5	32423.1	34310.8	27399.9	29609.1	19512.6	33054.8	31689.8	29220	25014.2	31363.5	26000.1	23078.7	26380.4	35647.2	21736.9	28272.3	35055.8	33294.9	30206.8	27047.7	31178.6	33906.9	27575.2	27993.2	28441.8	29744.9	24202.2	27668.5	34031.2	35219.2	38919.9	26577	28795.4	34484.6	28084.4	39075.8
M290.63987T15.78_1	290.64	15.7751	-	-		31466.2	31828.1	34626.3	24633.2	35163.7	28982.4	28761.9	34285.4	33897.8	35997.9	33228.9	30465.9	22379.9	33402.9	28091.2	26329.7	20954.9	30928.9	26782.7	26751	27968.4	31018.4	28239.7	29433.4	36781.1	30928.3	34227	34600.2	30806	32783.9	31088.1	29845.3	31119.9	33355.1	40936.7	28254.7	31336.7	33350.6	34723	30122.8	27492.6	34884	34020.9	35013.6
M290.6399T15.62_1	290.64	15.6196	-	-		103369	95902.3	96550.1	94762.4	99518.9	95562.4	89375.5	98567.9	105416	101526	98551.7	101601	74382.8	98137.2	105619	103069	96073.8	100424	86728.7	84560.8	96381.3	107909	90515.9	95975.5	114747	115074	112081	103321	114430	112788	101844	109897	96878.4	106862	101535	100397	118164	111992	122650	98790.9	102212	109883	108072	106519
M290.64914T16.79_1	290.649	16.7886	-	-	[M+2H-CO2]2+ 623.285	19470.6	15635.3	19206	16091.3	17128.5	14711.2	14736.4	15336.4	19252.2	15284.3	18507.1	18789.3	13700.3	18229.7	16590.7	16601.1	15446.3	16494.5	17113.7	15592.7	17175.8	15490.6	17139.6	15988.1	17428.1	19672.6	14762.3	17210.7	15684.2	15449	15508.9	15586	16192.9	17088.5	17652.5	16982.6	17396	17960.5	16543.9	14977.2	16781.2	17484.4	17778.1	17495.3
M291.01887T11.15	291.019	11.1499	-	-	[M+H-CH2]+ 304.025	29338	26439.2	24801	10856.8	25590.1	20960.5	22037.5	22168.1	21787.1	22949.2	29464.9	22772.7	19512.2	16705.9	22002.5	18867.6	20611.3	24500.9	13361.6	20802.8	16558.6	17793.6	15951.6	17116.4	13759.3	20691.2	22278	25931	16059.9	16823	16436.3	16819.9	20971.6	19944.2	18965	22683.3	25037.4	15598.6	25028.1	18139.1	18912.2	24154.6	22045.2	25817.6
M291.13708T16.65	291.137	16.6486	-	-		3761.54	3679.28	4372.58	2529.81	4240.61	1980.59	3104.66	4235.62	3367.13	3373.97	4023.7	2502.93	2521.44	2578.61	3837.1	4143.93	2743.63	2874.83	3185.28	3519.21	3787.78	3559.02	3459.11	3467.51	3269.81	3808.53	3327.06	3574.79	3127.94	3241.57	3617.23	3407.6	3906.46	3722.33	6275.36	4478.19	3768.42	3313.75	4649.34	3542.79	3878.13	3494.75	4727.52	4924.59
M291.14079T15.38_2	291.141	15.3793	-	-		7885.86	7725.51	7627.25	9611.32	9235.03	9934.59	10272.7	9858.89	10408.5	10118.8	8217.94	10479.3	6026.9	8387.33	11203.2	9027.03	6689.79	10190.2	6550.51	6482.62	8417.75	9824.74	7278.22	8813.09	10028.9	11678.7	8835.28	8006.41	8900.13	10016	7394.17	9011.07	7344.25	9015.51	6910.67	9154.15	10426.7	9679.32	12847.9	9238.96	9703.99	9791	9528.71	11295.7
M291.14105T15.62_2	291.141	15.621	-	-		30700	28574.3	31773.5	30728.2	31568.6	30023.5	27874.3	28442.8	35425.4	28999.4	30617.3	31348.7	23492.2	32896.8	31989	33203.6	29271.9	32994.1	29554.3	27847.1	27594.2	33479.3	27321.1	29985.5	36106.7	38907.3	33956.5	31022.8	37327.9	37274.5	36482.6	35931.5	36097.9	33350.8	30724.5	33902.3	41622.8	33361.5	38064.5	29345.3	33046.7	37388.9	31400.1	33581
M291.14124T15.78_2	291.141	15.7754	-	-		10839.9	12287.8	10036.4	9015.41	11420	7406.86	10389.6	9782.73	11065	14304.1	9597.94	9792.25	8083.77	9189.14	9424.6	8464.9	7280.59	8799.98	8802.65	8872.22	9052.34	9975.84	9035.44	11852.6	9986.38	10685.6	12484.6	11305.6	11647.7	12087.2	9741.32	9094.39	11268.2	10200.2	13596.7	9474.25	12317.3	10924.8	11719.4	9212.75	9616.82	11207.8	11917.5	9027.18
M291.14694T14.78	291.147	14.7844	-	-		7637.83	9081.62	8169.63	4509.62	7739.32	12371.5	8411.75	10637.1	6882.56	7005.52	8169.08	4532.2	7622.12	7054.63	7945.38	9570.82	4549.15	5682.8	7129.48	6061.87	8176.34	6127.84	7174.82	6811.48	9578.48	6921.41	8628.1	8641.92	6791.37	6920.63	6224.52	8593.95	7964.26	7068.86	11327.3	8374.5	10483	7459.24	7380.46	7841.35	5738.18	9217.05	9028.17	7198.7
M291.15074T16.79_2	291.151	16.7884	-	-		5797.36	4905.75	4948.76	5537.55	5621.73	5296.08	4774.54	5494.39	4823.49	6012.11	6604.29	5758.11	4718.72	7250.48	7055.63	5947.56	5215.49	5795.73	5861.55	5069.37	6254.24	5293.97	6606.03	5347.4	6212.41	6020.16	7165.67	6223.36	7253.83	7731.74	6004.84	5902.94	6481.54	6644.65	6589.55	5403.01	6137.38	6623.29	6834.59	7021.43	5254.11	5133.24	6623.55	5985.18
M291.62172T14.03	291.622	14.0284	-	-	[M+Na]+ 268.631	3582.52	4697.45	3920.52	3802.11	3583.79	3217.4	3567.46	2312.15	3326.72	3251.73	4121.68	3739.39	2566.98	3419.99	3207.31	3143.83	3439.35	2201.57	2946.53	2632.03	2381.2	2814.54	2875.99	1807.23	3284.2	3533.07	4881.66	4043.45	2768.09	3284.13	3199.71	3815.88	4229.52	5090.9	3005.24	5485.22	5182.34	3066.27	4388.08	4154.37	2571.29	4363.17	4708.73	4090.45
M291.63097T14.72	291.631	14.7241	-	-	[M+2H-C2H4]2+ 609.267 [M+2H-CO2]2+ 625.235	7648.95	7588.1	7913.79	7310.53	8531.62	6880.4	8033.26	7447.76	10768.1	10022.1	10358.3	11204.5	9385.48	10765.9	9114.55	8427.54	8711.21	7070.29	8182.52	7212.2	7425.1	10260.3	7241.99	8620.7	9652.8	9097.78	8514.17	7202.41	7690.46	7007.74	6623.68	9363.46	9024.41	9784.61	6797.32	7153.38	8612.12	9089.36	9579.11	8039.66	7779.85	8485.63	7079.68	10208
M291.63934T14.93	291.639	14.9287	-	-		12371.4	15807.2	13604.1	9491.37	16907.3	13642	16898.3	12567.2	16920.6	16678	14968.8	17561.7	12152.8	15388.1	16489.5	16834	13623.6	16514.1	16152.9	12284.4	13154.9	14895.6	11662.3	14562	15839.7	14665.8	14173.8	14322.5	15167.1	16483.3	12352.5	13212.8	12665.7	14346.1	11340.6	13747.6	17160.2	12515.6	13881.6	10353.7	12748.2	13966.2	12494.7	14807
M291.63941T15.62_1	291.639	15.6227	-	-		17689.6	18322	19166	18207.9	19816.7	16860.6	18102.1	18153.8	17577.8	18702.2	16933.9	16289.1	12587.5	14706.6	17029.8	15917.2	14305.2	16668	14153.4	13359.4	15187.1	15982.3	13450.2	13731.2	19852.3	18124.2	18136.7	16719.1	21465.2	17032.1	18183.6	17637.4	17741	18230.7	17426.3	17875.1	17807.2	19196.6	19233	15193.8	17086.6	17768.4	21100.8	19932.8
M291.64743T16.79	291.647	16.79	-	-		8131.63	7796.76	8713.98	8698.75	7003.52	6663.72	7531.83	6522.22	7393.98	7652.63	8667.14	8492.5	7163.34	8383.54	6671.11	8111.31	7895.29	7223.24	7368.44	7003.3	9852.34	8581.41	8560.28	6533.6	6586.83	7907.94	7522.62	7860.81	7443.45	8544.93	8833.6	8336.16	7043.63	8676.71	10037.2	9475.54	8273.69	7869.8	8078.91	6595.13	7957.01	8529.29	9441.99	7620.2
M291.95129T1.63	291.951	1.63156	-	-		9074.48	9990.41	9406.38	3083	9146.23	10229.3	10621	7813.9	10435.6	7788.45	8099.23	9777.99	8651.95	10490.6	8419.85	8319.8	11608.1	10287.2	9770.23	10118.2	11836.7	10073.8	9296.41	8942.58	7902.03	8328.26	10554.3	9208.78	10526.7	10332.2	7165.8	10035.8	8311.93	9426.82	8241.61	9907.81	9454.79	7014.87	8291.38	7905.64	7836.24	8493.05	7024.83	7926.94
M291.9514T1.24	291.951	1.23682	-	-		6774.49	6149.4	6755.41	3620.8	5402.86	6717.11	9123.51	6679.8	7182.09	6419.89	7382.4	7721.05	9270.25	7244.55	6169.19	7878.49	7840.18	8262.94	7681.66	6412.51	7335.7	7251.44	7368.07	6287.46	6742.17	5027.79	6658.09	7125.91	7847.32	7491.1	5332.07	6090.06	5993.61	7615.41	6337.85	9313.53	7299.82	4057.56	6646.78	7730.65	7750.94	8112.41	6725.14	8511.23
M292.01436T8.39	292.014	8.38585	-	-		3716.75	3799.46	3537.01	3945.16	3465.6	4170.28	3495.83	3709.4	4400.33	3614.12	3986.72	3954.31	4595.18	4186.06	3423	3553.84	3486.11	3659.89	4171.25	4259.12	3512.76	3673.99	3824.54	3908.57	3445.65	3929.22	4083.62	3593.82	4146.21	4408.63	4213.42	3794.66	3890.91	4513.84	4440.19	3609.69	3851.96	3785.95	3503.85	4324.7	3945.52	4523.42	4097.31	3972.61
M292.02184T11.15	292.022	11.1504	-	-		4256.16	4393.75	4644.84	1562.14	3685.38	3776.15	4667.35	3445.81	4017.72	4601.42	3642.48	4018.42	3509.52	3191.66	3919.17	3426.76	3982.54	3777.78	2874.02	3215.95	2874.17	2686.25	2803.69	2883.69	2140.71	3191.02	3858.21	4198.04	3419.92	3065.11	2740.73	2516.02	3276.97	2764.09	2874.81	3603.82	3795.77	2312.59	5642.2	2195.17	4229.31	4611.75	2745.16	3482.78
M292.11394T1.01	292.114	1.00724	-	-		8444.83	6289.25	6153.38	5645.19	6014.38	7045.92	5889.31	5926.41	8674.74	6672.4	5621.83	7650.59	5889.49	5983.81	5889.93	5792.31	5505.19	5764.55	5632.26	6361.91	6872.41	6754.47	6088.89	5690.3	6098.5	6545.92	6232.64	6103.77	4317.96	6149.7	5473.53	6320.9	6282.26	5770.11	5524.77	5871.42	5421.11	6434.59	7012.09	6261.01	5095.72	6102.58	6153.88	6054.33
M292.13673T13.87	292.137	13.873	-	-		7393.45	5979.09	5967.17	2500.91	4808.37	5854.65	6303.21	4566.79	3878.84	3845.18	3624.94	5877.37	5082.49	8251.63	8718.81	6474.38	5426.27	5729	6049.99	5990.58	5333.68	4795.79	5480.85	7229.75	7899.3	5358.41	6634.25	4382.19	5106.22	4859.94	6120.64	4933.08	5389.2	6261.67	4382.83	6002.75	8761.03	4920.42	7610.61	5146.8	6835.78	5421.29	6126.13	7310.83
M292.14044T15.62_2	292.14	15.6212	-	-		5045.18	5519.05	4197.8	4486.77	5071.97	4025.48	4377.02	5382.84	4489.11	4448.01	4313.48	3794.5	3709.94	4161.53	4577.58	4338.46	4124.81	3663.61	4328.78	3759.5	4422.52	4727.71	4911.39	4264.5	5934.39	4222.57	5106	4549.84	4648.87	4516.03	4233.59	4748.07	5708.22	5872.28	5155.59	4886	6492.37	6103.97	5838.01	4551.97	5614.02	6343.86	6154.51	5537.41
M292.14173T14.92	292.142	14.9217	-	-		5262.38	6911.26	4798.25	4302.17	6460.39	9950.12	6108.39	5398.53	5883.19	7558.11	5448.89	3652.5	4109.66	4572.68	5629.1	5259.38	4548.08	4428.27	5924.9	5123.86	3919.33	5440.39	4114.91	4663.75	4803.61	6998.45	5255.53	4948.94	4802.06	6467.58	5235.96	5449.39	5652.06	5435.82	5340.67	6130.03	6368.89	6050.68	5390.09	4591.74	5220.28	6954.58	5494.63	4825.1
M292.14868T16.79	292.149	16.7945	-	-		2455.42	2565.9	2370.85	2094.57	2898.13	1624.99	2273.7	2370.55	2961.58	2662.64	2614.82	2654.09	2900.95	3256.2	2550.03	2767.58	2895.8	2576.19	2559.37	2663.69	2480.9	1990.99	2132.04	2509.24	2782.61	2045.03	2844.63	2276.14	3201.28	1944.15	1815.13	2414.84	2811.93	2226.66	2927.89	2536.97	2654.12	2655.35	2289.56	2258.5	2416.11	2454.43	2294.01	2025.62
M292.42111T0.74_2	292.421	0.738001	-	-	[M+H-CO]+ 319.411	11269.4	9324.62	7069.23	7523.75	8319.38	9144.41	9724.8	6894.26	9125.83	7925.76	8013.02	9648.16	11100.8	9993.8	10851.7	13008.2	8835.93	10673.6	10392.6	10482.8	11175.1	10208.6	10399.6	10844.7	11616	8413.88	9851.23	8584.65	10468.3	8784.78	7587.98	6182.86	9446.65	8921.18	9842.66	9620.2	8264.56	8359.3	8585.42	6707.9	9026.18	12785.6	7617.86	8004.7
M292.57367T12.92	292.574	12.9167	-	-		2583.51	2721.66	1411.51	2032.8	2434.48	1805.36	1433.48	1679.12	723.789	1942.24	1437.68	2129.81	1447.15	1416.17	1640.34	2443.96	1882.61	1856.91	1832.5	1688.4	2832.7	1887.17	1879.86	2585.12	2744.24	2234.53	1783.65	2891.83	1633.95	1869.95	1850.77	2572.89	1908.29	1808.15	2465.68	1378.85	2128.08	2233.24	2325.37	1651.95	2274.34	3115.89	3416.1	2512.26
M292.63012T14.72	292.63	14.7241	-	-	[M+2K]2+ 507.333	3663.98	2461.14	3300.23	2595.65	2913.67	3336.64	2804.64	2162.74	3332.54	3269.03	3706.91	1937.12	2514.83	2312.14	2700.39	3247.67	3296.31	2749.82	2668.01	1944.97	1758.79	3024.23	2292.16	3611.47	3619.96	3844.18	4244.01	3232.64	3507.49	3333.45	3024.06	3090.66	4231.84	3091.47	2740.71	3735.11	3365.36	2930.69	3877.89	2377.26	2124.37	3447.8	4066.8	2217.23
M292.6375T14.93	292.637	14.9319	-	-	[M+2K]2+ 507.336	5619.86	5939.54	5061.67	4957.17	5729.06	7987.55	6105.37	6722.44	8026	7208.64	6139.77	6709.09	4528.49	5358.48	7030.89	6734.22	7139.74	7059.41	6706.78	5063.72	5515.18	7047.36	4733.39	7257.42	6824.28	6940.4	7160.46	7533.71	7509.64	8749	5744.96	6079.16	5913.37	6762.55	4810.81	7545.7	6736.27	6820.98	8899.13	4828.86	7038.81	6307.22	6463.83	7841.26
M292.6385T15.62	292.638	15.6213	-	-		6768.91	5687.83	7654.71	7716.89	6558.2	5664.77	5975.24	5978.18	6571.89	6425.56	5482.7	5700.89	5386.06	6795.46	6767.31	4637.91	4518.28	6170.82	5513.22	5552.22	4888.95	6856.13	4624.74	4534.24	6741.5	5713.1	6766.6	4323.76	6490.31	6628.27	5627.57	5581.98	4876.74	6808.71	6090.35	6266.58	5430.77	4872.99	6545.67	5561.03	5789.41	6335.12	7455.61	5552.29
M292.99815T8.83	292.998	8.82899	-	-	[M+Na+CF3COOH]+ 136.022	5588.07	7233.91	7225.9	5366.91	7387.13	5226.76	6085.58	4976.7	5207.71	5116.23	5332.92	4815.9	4561.37	6180.01	6471.72	6073.41	5753.63	5625.09	6208.36	5831.7	7290.85	5401.47	4969.3	2385.7	8031.91	4791.39	4572.39	5333.66	4875.08	5326.66	4522.96	5909.64	4896.52	4498.83	4809.66	6056.72	5214.7	5240.29	4877.33	4868.55	7347.65	5281.43	5012.34	5613.4
M293.09795T1.28	293.098	1.28484	-	-		4.99446e+06	431476	4.68812e+06	3.52449e+06	4.18618e+06	4.50326e+06	4.65215e+06	4.34266e+06	4.56583e+06	3.80856e+06	3.13985e+06	3.53406e+06	4.04118e+06	3.73501e+06	942121	3.67599e+06	3.43699e+06	3.60008e+06	3.91446e+06	3.54247e+06	4.05709e+06	4.24744e+06	3.95392e+06	4.13348e+06	4.10446e+06	4.11524e+06	3.37773e+06	3.64004e+06	3.90491e+06	3.73389e+06	3.79512e+06	3.90302e+06	4.78478e+06	1.00035e+06	3.91955e+06	4.09293e+06	3.94654e+06	4.76834e+06	4.23289e+06	3.80448e+06	3.76553e+06	3.99894e+06	4.77495e+06	3.83449e+06
M293.09805T1.03_2	293.098	1.02939	-	-	[M+H]+ 292.091	2.11532e+07	2.1022e+07	2.24576e+07	2.15733e+07	2.20951e+07	2.09497e+07	2.2774e+07	2.20094e+07	2.24794e+07	2.21542e+07	2.14847e+07	2.15841e+07	2.17627e+07	2.15675e+07	2.15244e+07	2.13355e+07	2.10331e+07	2.06859e+07	2.10842e+07	2.16503e+07	2.19071e+07	2.1753e+07	2.16469e+07	2.10635e+07	2.16244e+07	2.12916e+07	2.12975e+07	2.12533e+07	2.13367e+07	2.0849e+07	2.16106e+07	2.12196e+07	2.14222e+07	2.15831e+07	2.18004e+07	2.16928e+07	22562918	2.26121e+07	2.21551e+07	2.14284e+07	2.12121e+07	2.16117e+07	2.22567e+07	2.15734e+07
M293.09806T1.63	293.098	1.6319	-	-		337057	339082	263171	307536	355177	299035	351496	312326	396713	291615	257624	316166	368752	333562	333922	301854	293927	295852	253464	301118	369064	289543	290056	272982	338278	337505	308731	315283	314835	294476	296839	309799	293841	376102	319121	364416	359947	424638	305407	283055	311969	317559	392518	322166
M293.23002T1.03_3	293.23	1.0289	-	-		9969.69	10350.4	11815.8	9618.32	10382.2	9585.23	10535.4	10836.8	11305.4	11035.2	9395.57	9539.96	11019.5	10611.8	10489.7	10040.7	9386.64	9868.84	9244.52	10238	10155.6	9843.85	10184.3	8925.54	9858.43	9631.27	10203.2	9821.46	9068.05	9124.54	9516.15	8306.82	9261.66	10458.2	10039.7	9303.41	10168.1	10953.1	10321.3	9240.78	9160.25	8859.76	8684.17	9758.75
M293.32152T1.03_4	293.322	1.0287	-	-		29317.6	28720.3	30438	25767.4	26161.5	25955.7	29099.1	24840.7	28616	27509.8	22558	25228.1	29348.6	26637.1	26910.3	24448.2	23572.4	22443.7	24280.5	28597.9	27417.7	28053.9	26179.9	25911	29097.9	30530.7	28580.1	27707.1	29899.7	25724.3	26550.8	24217.5	28578	27587.1	28089.8	29267.5	31292	30364.4	28767.1	23389.6	23891.3	27304.9	28299.1	26442.4
M293.43761T0.74_2	293.438	0.735259	-	-	[M+Na]+ 270.454	5401.36	4900.28	5512.15	3746.04	5192.15	5026.65	7669.88	3708.6	5249.19	5767.73	4370.52	4434.88	5641.88	4833.24	5739.16	5140.96	6357.19	5507.82	4966.81	5411.39	6118.51	5802.84	5652.67	5485.29	5962.06	4999.67	5391.18	4191.3	6367.43	5248.16	6074.33	3174.85	5520.04	3978.18	4736.29	6302.94	4244.73	4418.58	5066.06	3004.72	4680.9	4670.82	5213.25	4111.62
M293.62149T1.03_1	293.621	1.02945	-	-	[M+K]+ 254.665 [M+Na]+ 270.639 [M+H]+ 292.621	4686.5	5079.41	4257.81	5421.11	4004.34	4402.4	4779.66	4407.04	5028.67	5133.58	4453.41	3991.75	9435.45	3626.48	4275.75	3529.96	3717.17	4013.67	4235.83	4128.17	3917.65	9442.34	4351.52	3666.22	4300.2	4005.95	4513.67	4000.91	4094.85	3864.29	4168	3744.24	4385.17	4235.52	4658.11	4191.66	5160.69	4201.91	4814.78	4015.55	3783.26	4542.94	4628.86	4417.19
M293.63521T1.03_2	293.635	1.02913	-	-	[M+K]+ 254.665 [M+Na]+ 270.639 [M+H]+ 292.621	11136.6	10606.3	10141.8	9667.51	10195.8	9053.52	10428.7	9532.24	10823.1	9530.54	8943.85	8989.62	9754.03	9487.38	9367.26	9608.92	9592	7170.48	8630.31	9423.44	9480.66	9897.68	9827.32	7913.46	10061.5	10525.8	10673.6	9622.78	9345.76	9654.42	9191.77	8941.38	9760.48	9304.42	9703.05	9986.95	10860.2	11040.5	9700.82	8140.76	8589.64	10125.9	10123.3	9355.86
M294.03187T9.19	294.032	9.18919	-	-		2955.48	3787.87	3669.12	2225.02	3288.38	2424.24	3839.55	3321.29	2766.6	2919.69	3757.42	3401.15	2796.17	4078.99	3255	1632.32	3550.01	2940.55	3127.12	2849.23	2187.65	1804.42	3110.74	379.779	1498.48	2939.48	2144.69	2628.48	1933.56	2096.84	2268.06	2419.11	2042.13	1468.21	3069.54	2989.97	2458.61	2886.88	1772.89	2324.98	2876.5	2279	1793.7	2103.29
M294.10118T1.03_3	294.101	1.02913	-	-		3.04033e+06	3.0006e+06	3.05215e+06	2.91653e+06	2.93153e+06	2.93562e+06	3.09856e+06	2.91033e+06	3.01455e+06	2.92825e+06	2.78779e+06	2.8508e+06	2.96631e+06	2.85623e+06	2.88305e+06	2.79655e+06	2.73823e+06	2.87774e+06	2.78344e+06	2.88603e+06	2.91076e+06	2.90585e+06	2.8664e+06	2.76709e+06	2.89796e+06	3.11032e+06	2.77865e+06	2.80707e+06	2.79604e+06	2.77793e+06	2.82123e+06	2.77485e+06	2.8114e+06	2.84428e+06	2.81323e+06	2.93167e+06	3.0767e+06	3.11335e+06	2.94536e+06	2.75823e+06	2.76529e+06	2.87882e+06	3.0327e+06	2.88147e+06
M294.10135T1.29	294.101	1.28529	-	-		781695	488893	593126	510584	600315	737506	706246	647153	650447	638118	460445	575650	490832	536428	491141	500751	466272	489637	457148	535567	495606	623425	498252	533661	577242	526948	506829	539178	509682	636131	501679	670414	644435	580280	600745	584607	605412	776018	713904	675792	541747	573401	680007	614268
M294.15487T1.22	294.155	1.2157	-	-		136586	148999	130847	100627	112392	109164	101027	122708	116905	137599	145563	80728.4	89314.5	103461	128617	100771	126947	103494	106848	68763.2	90430.2	73941.7	110463	165622	142284	128052	198947	78323.2	137885	115537	130823	130013	172828	157854	113547	109714	109638	105156	137504	100645	226562	170119	96059.9	62556.2
M294.64487T15.24_1	294.645	15.2413	-	-		20244.7	20811.4	21599.6	14550	24521.1	26970.6	24956.3	22558.4	26227.2	26029	20321.7	23637.2	24767.9	25641.5	22957.2	22359.5	20713.2	19531.8	21326.6	21703.8	20247.3	19214	22165.2	23692.8	23037	18364.6	23651	21756.8	20137.2	19779.5	21456.2	17332.9	19985.1	21963.8	21926.3	18915.4	20083.2	21495.7	24480.8	21766	20433.6	21261.8	21539.2	21987.4
M294.939T0.83	294.939	0.829795	-	-	[M+Na+NaCOOH]+ 203.961	170994	173607	174500	182913	179731	180364	167895	175829	174564	181294	184825	187449	170627	168122	164802	172974	181515	177925	171025	171861	183831	179573	188203	190591	168410	168662	177141	184954	185023	176062	182906	170208	185563	192638	182469	189622	169801	149767	195129	179167	195787	187517	168679	190907
M295.10279T1.03	295.103	1.02939	-	-		524844	515433	528691	522120	531761	528967	534503	518278	533720	518811	492958	493545	527114	523200	552005	517299	519295	521753	541224	535043	513783	499039	499445	481740	548134	539420	529178	526930	526502	528400	532075	526889	533629	508767	544071	509131	538147	563032	514957	520355	504279	510395	552425	534210
M295.129T7.95	295.129	7.95084	-	-		31221.2	26988.4	24594.1	11594.5	28686.9	29301.8	24397.7	24180.7	22131.1	37365.7	19404.9	24075.2	22310	33863.2	24935.5	20844.8	17478.6	16307.8	27738.9	25449.9	22952.4	25459.9	26134	23740.4	21882.6	23323	40513.7	26973.3	29186.5	28314.3	30082.9	20537.5	27600.7	18872.6	21559.3	32598.2	31357.4	25043.1	27008.2	22888.7	26973.2	27082.3	31393.9	25356.7
M295.14678T15.24_2	295.147	15.2411	-	-		5675.19	6462.58	5564.75	4577.77	5247.65	6491.15	6140.64	5543.58	5449.04	5986.79	4686.19	6175.91	6729.07	7339.97	5693.98	8247.38	5435.74	6816.76	6950.47	5084.04	6183	5726.43	4976.13	6337.09	6465.73	5521.7	6249.89	6890.14	6546.79	5713.9	6516.88	6243.14	5307.57	6100.41	8113.28	6618.38	5613.61	6670.89	6803.65	5305.35	5196.84	5713.98	6117.93	7707.67
M295.64378T15.24_1	295.644	15.2395	-	-	[M+K]+ 256.675	54193.4	46544.3	50201.4	40506.8	48394.3	39745.8	43851	45616.5	44496.1	46175.2	50127.7	45794.4	42501.6	46255.4	42636.5	45234.3	35583.2	41751	42927.7	39324.5	41615.6	45764.2	45559.7	43356.6	58314.4	48207.3	47880.4	46176.7	47322.7	45159.5	41917.4	47048.6	46157.9	46771.7	53515.4	43192.3	51769	47365.4	53945.3	44631.4	44879.8	45404	52189.1	49608.7
M295.64401T14.97	295.644	14.9726	-	-		18661.4	16155.4	17713.9	12032	16562.5	14510	19235	15503	18775.6	18882.4	15329.1	17141.7	14050.5	19156.2	17904.6	19059.7	13792.3	16119.6	17401.9	15364.6	15644.8	16797.8	18074.1	17230.5	27860.1	16943.6	20019.7	15678.6	16801.9	17547.1	17285.1	16859.2	20331.8	16724	19180.2	18567.6	15278	18679.8	24587.5	17384.2	16384.2	19079.7	16623.6	15532.5
M295.94238T0.83	295.942	0.831324	-	-		9434.58	9172.68	11249.9	8265.45	9221.65	8021.7	7298.36	8698.33	9017.76	9782.58	9491.07	9002.7	8018.58	8978.94	7524.58	8520.52	8927.41	8197.88	8235.07	7667.85	9148.24	8310.78	7878.78	9421	8128.11	7485.07	8021.86	9278.66	8170.11	8742.42	10191.9	7658.95	8595.62	7992.25	7708.49	8597.6	8409.62	6979.32	9597.59	2794.68	8589.85	7657.96	8367.04	6832.51
M296.10562T1.03	296.106	1.02913	-	-		47321.1	42423	50047.3	50127.7	45167.5	44701.8	49686.5	47238.2	50416.5	47087.7	46937.7	48937.6	44642.8	47038.8	47457.4	48586.1	44679.4	45080.9	47386.3	47293.8	47795.5	48527.8	48842.9	46632.2	45965.3	46084.3	47615.5	45727.3	48908.6	44067.5	45193.7	49644.8	47611.8	47724.4	49966.2	49239.1	49274.3	55227.1	47345.1	48183.9	47832.5	46965.6	50329.8	45747
M296.13241T7.95	296.132	7.95442	-	-		4221.32	4243.86	3790.84	1732.66	5251.73	5193.07	3443.07	4021.77	3697.68	5939.35	3390.64	3622.6	4211.73	4624.97	4095.34	2908.96	3173.66	2757.44	5795.85	5054.74	3660.56	3523.8	3491.38	4091.93	3113.78	4111.01	5723.24	4242.34	4211.29	3916.96	4209.98	4455.92	5651.9	3344.2	3696.49	4529.94	5833.09	4170.52	4254.71	3563.17	5238.61	4980.76	4830.6	4008.94
M296.14547T15.24_2	296.145	15.2377	-	-	[M+H]+ 295.142	17076.5	19935.1	18273.5	17497.7	17643.4	12937.2	17891.1	15995	14951.4	15512.5	14331.5	16327.2	13658.5	17143.2	15034.6	15864.5	16073.9	16026	16776.2	14623.8	15456.3	17220.6	15385.2	16818.5	19928.8	16683.2	15042.3	15848.4	16394.8	16025.4	14825.5	17220.7	15432.3	15284.1	16853.8	15694	17833.5	17295.5	18900.1	15005.6	14669.9	18029.9	20412.9	15989.8
M296.15725T16.19	296.157	16.188	-	-		3248.94	3681.65	2877.49	2392.87	3206.82	2220.13	3282.41	3202.34	4123.65	1802.05	4202.38	2165.29	2441.87	3181.82	3050.04	3146.47	3487.08	1419.69	2454.32	2582.72	1994.77	2997.88	2788.13	3612.51	5721.47	3703.5	7117.21	4231.55	3438.13	3277.06	2213.04	3530.81	3440.63	3153.77	3981.56	3583.9	4077.1	3897.28	3985.92	3116.4	3209.3	3342.88	2770.2	3293.79
M296.25855T15.48	296.259	15.482	-	-		5356.29	4464.74	8376.82	2449.06	8233.59	4908.87	16444	7470.39	8136.81	4700.26	11250.5	17761.1	10604.1	5619.83	13569.4	3132	5101.92	8386.86	7547.29	3735.01	8726.33	2904.7	5665.84	4929.98	21758	12949.4	10338.1	4942.08	12486.6	4065.41	4453.32	7573.49	6300.69	3756.81	123.142	4304.13	2129.39	4426.6	5476.69	5561.79	5241	4537.65	12732.5	8941.44
M296.25864T15.27	296.259	15.2748	-	-		3046.67	2479.69	5401.21	2356.06	5309.67	3822.94	11426	4781.35	4268.03	4189.14	8280.61	12538.9	7505.82	3377.93	10777.7	1972.44	4396.16	6944.99	5045.16	2779.74	6801.25	2703.79	1881.75	4423.3	5468.75	8653.48	5435.46	2222.12	5500.83	2123.11	1720.24	5255.57	3296.79	1798.7	533.39	1009.95	1269.95	1505.15	4417.84	4331.49	1105.84	1677.85	7281.28	4528.37
M296.64573T15.24_1	296.646	15.2398	-	-		5140.86	3757.37	5198.14	3869.15	4540.95	3769.53	4730.58	3744.5	3633.96	3851.14	4128.96	4106.5	3807.58	6170.54	3721.9	3490.11	4194.98	3271.89	4061.25	3441.51	4167.37	5249.3	3243.84	4436.41	5567.01	3783.26	4093.41	4023.72	5066.16	5961.02	5111.22	5202.53	5703.01	5324.77	6216.07	4076.16	5950.16	5462.32	6002.27	4386.16	4393.19	5288.12	5061.09	4176.6
M296.64946T16.32_1	296.649	16.3204	-	-		7860.51	7275.29	6840.78	5808.04	7440.07	5795.18	6460.72	6101.5	6143.23	7114.36	9954.57	6637.26	4458.22	5936.89	5776.49	5123.02	4879.31	7123.96	5539.83	5074.87	6555.15	7797.99	5184.29	5842.77	5176.53	6227.78	5967.43	6146.85	6712.9	8096.48	5158.84	6328.85	8565.58	6565.22	6911.19	6715.96	9657.35	6798.03	5021.9	5994.12	6768.56	7813.33	8089.38	7563.09
M296.97015T0.74	296.97	0.735482	-	-	[M+K]+ 258.006	3990.14	4220.89	4183.54	4664.9	4784.48	4691.14	4711.27	3826.78	4750.86	4463.44	4527.71	5279.87	4692.63	5734.9	4696.3	4251.71	4687.46	5155.19	5751.9	4641.89	4228.18	3852	6179.12	5146.56	5310.12	5145.78	4329.07	3837.61	5179.63	4804.14	4890.8	3540.23	4830.97	5091.02	5308.51	5326.6	5515.9	4329.99	4570.29	3899.32	6284.36	4570.38	5029.61	4983.94
M296.9934T8.39	296.993	8.39037	-	-	[M+H]+ 295.988 [M+H]+ 295.988	11417	12618	11661.1	10452.2	13720.4	15017.4	12479.7	13380.3	13165.1	12462.5	13210.2	14474.9	12923.6	11405.7	12708.3	12151	13044.3	13855.7	14193.1	13514.4	12480.6	13810.1	12008.1	13852.5	13136.4	13165.4	13930.4	12709.2	13369.1	14068.8	14239.9	15846.3	13950.8	16102	13651	12325.5	13044.5	12902.6	12706.9	15861	13772.7	13918	12813.3	13319.3
M297.02139T8.83	297.021	8.82932	-	-	[M+H-CH3]+ 311.036	1578.77	2228.9	2275.5	3115.34	2200.69	1871.91	2574.5	2162.38	2328.22	1573.57	2086	2486.22	2274.18	2592.29	3279.89	4122.57	2446.71	2123.58	2301.49	2335.37	3496.55	2653.51	2161	1099.95	3237.41	2278.21	2742.04	2362.41	3227.47	2323.27	2861.01	3485.11	1998.58	2633.45	2202.14	2500.46	2726.8	2965.36	3064.61	2297.39	2288.51	3014.16	2773.05	3195.28
M297.10755T1.04	297.108	1.03734	-	-		6343.99	5530.2	6236.32	5591.38	6012.18	5426.91	6426.2	5467.03	6583.83	6624.71	6721.28	5136.08	7156.54	5654.44	5635.28	6418.42	7085.42	6477.74	6131.92	6425.85	7912.98	6642.06	5883.48	6538.62	6727.16	8078.44	6849.61	6070.94	5813.27	5913.81	6285.3	5940.54	5999.1	6862.02	5612.66	7414.46	6776.21	6535.8	5832.28	5129.7	5194.27	5995.6	5673.95	5650.11
M297.14688T15.24_2	297.147	15.2391	-	-	[M+H]+ 296.138	107696	93737.2	92777.2	76004.6	92541.6	93107.3	97121.1	94368.7	94615.3	89210	91103.5	102368	91033.6	96647	95609.3	100354	84535.8	90175.9	92671.5	88001.1	92010.1	99430.6	95286.6	93101.4	121856	95008.9	104364	92020.4	97437.2	92336.7	95202.8	96301.7	101346	94354.2	109982	101608	104969	118584	126187	96048	93668.1	97097.6	108934	94976.4
M297.14709T14.97	297.147	14.9709	-	-		54755.9	47255.7	53620.6	33171	51507.4	59072.5	58626.3	54291.6	51802.3	55226.7	47036.1	55498.2	49966.8	57802	54479.9	54284.7	41121.4	41674.5	50047.3	45576.2	47067.1	48264.5	51296.7	52327.9	72542.5	50008.4	53354.1	50044.7	51700.8	51013.3	50734	47473.7	48776	52058.2	54489.1	47013.6	44788.5	54905.9	70725.3	50086.3	44396.5	50653.2	49046.8	48916.9
M297.14793T15.62	297.148	15.6227	-	-	[M+Na+K]2+ 532.352	8175.03	9019.46	8508.11	7043.37	10159.8	9086.08	11526.6	11363.6	10220.8	11364.9	9867.07	10197.1	6802.17	8564.63	8786.11	7902.28	7520.19	8163.98	7081.04	6597.07	7709.82	9822.02	5857.89	9362.79	10060.9	10951.2	10249.1	7986.7	10651.1	11234.9	8693.1	9083.39	8810	10043.9	8633.38	10073.8	11464	9544.86	12486.6	9183.98	8164.59	10476.1	8535.69	10378.5
M297.64089T14.32	297.641	14.3193	-	-		7214.08	6303.61	5995.54	3359.3	4950.68	5691.38	7707	4615.74	3984.34	6136.05	5781.66	7230.54	2900.01	8159.24	6613.45	5202.81	4381.78	5844.43	6074.39	3689.27	4485.72	4823.95	4260.36	7643.08	4275.92	5244.35	6666.11	4770.59	6102.99	6555.93	6591.64	5383.24	5764.5	7081.67	5663.33	5267.65	7978.84	5012.7	6472.92	4575.95	5252.66	7490.27	5398.96	5637.82
M297.64122T14.53	297.641	14.5333	-	-		11950.2	9995.05	10547	5790.28	9572.65	9412.54	13211	10127.2	9087.33	13850.5	11884.2	11019.7	10295.3	10387.3	8959.17	8349.5	5750.67	8032.14	11203.4	8047.84	8750.06	9242.33	8683.41	11736.5	12622.8	11361.2	12157.4	10253.3	11177	10980.7	13420.6	12702.8	13708.2	13513.7	16927.7	11477.9	18529.3	13977.1	17810.2	10251.7	14248.4	12250.9	12364.3	13630.9
M297.64835T15.24_1	297.648	15.2386	-	-		33973.1	28429.9	30631.1	27195.4	38224.7	32887.5	33383.4	28930	31066.9	30740.6	29492	32676.9	27873.9	32582.6	33275.9	32118.7	30452.9	28722.9	29433.7	29231.6	29036.9	32566.3	27756.3	28980.9	33477.4	30402.9	30069	26088.5	32887.3	30081.4	31107.7	29038.8	29662.4	29284.3	33323.2	28794.8	31923.4	32003.8	35858.7	31193.8	28360.3	34702.8	38486.9	29733.7
M297.64877T14.97_1	297.649	14.9712	-	-		20399.6	14281.2	17221.1	11123	14931.4	18956.1	20499.6	15078.8	18654.2	15499.7	15598.9	19364	18796.6	19290.4	19039.2	16823	14636	13866.8	15323.4	13079.1	16056.3	15094.7	14824.3	15332.4	23855.3	19054.5	15344.6	15159.4	16328.6	18791.4	15539.8	11506	15252.1	13154.6	17924.5	16187.4	12837.3	16961	20644.5	12940.2	15477.6	15224.3	15294.2	14442.6
M297.9733T0.74	297.973	0.735325	-	-		1819.83	1781.51	2689.13	1548.52	1644.5	1310.7	2025.39	2013.59	1787.41	1572.11	1526	1938.66	1260.26	1534.03	1988.45	1810.17	2462.45	1624.19	1700.93	1652.94	1252.81	2504.96	1212.1	2029.73	2062.49	2165.92	1926.87	1552.7	2564.74	1400.79	1586.93	1959.95	1445.58	1732.54	1545.57	2248.87	2564.66	1722.14	2797.64	1744.17	2011.63	2103.43	1962.49	2152.57
M298.06128T9.19	298.061	9.19027	-	-		5263.67	4270.98	4705.07	2642.78	4784.2	4980.65	5167.59	6044.16	3896.92	5589.01	5862.79	3937.6	4654.72	5701.96	5812.86	2833.83	4590.15	7033.86	4540.22	5432.72	5374.66	2296.38	4868.46	1227.55	2209.12	5521.1	3263.47	5012.42	4410.74	4288.88	4943.05	4865.38	4510.93	3410.33	6881.77	5076.05	5359.84	5269.24	4820.76	4554.61	5285.77	5170.59	5026.8	5521.01
M298.12259T14.08_1	298.123	14.0815	-	-		21406.5	29196.5	21359.2	16558.2	19920	18507.4	20303	20950	17891.4	20810.7	20171.2	30191.2	18152.7	18992.8	32147.1	21494	26067	24599.2	27527.2	14873	26044.3	18531.3	15659.2	18590.9	24910.3	28911.9	29002.7	23266	28645.1	29236.5	19990.3	26925.1	33915	37615.4	21902.7	29672.1	26540.1	28191.6	33496.8	21564.5	28425.5	27939.4	21114.6	20598.8
M298.14511T15.24_2	298.145	15.2386	-	-		45218.8	37320.4	42316	37455.9	39751.5	43437.2	44615.5	44667.9	40704.6	39043.7	43193.9	45458.8	38398.2	46857.6	44315.6	43361.3	40550.2	41830.9	40869	35652.3	39503.3	42708	40690.1	42402.5	47042.3	40610.5	44193.3	39263.6	46527.2	42724.7	41794.4	41013.7	40795.2	39766.6	42631.4	40691.4	45836.9	47927.3	52729.8	37877.1	40318	42519.7	42098.3	37963.9
M298.14527T14.97_2	298.145	14.9699	-	-		25376	20344.2	23797	12164.8	23581.3	24183.8	26753.8	20789.2	20685.9	24467.9	19921.2	23008	22487.6	24833.2	23934.1	24424.7	18579.5	18831.2	23201.9	18730	18454.7	24681.1	20782.4	20385.5	29231.3	21505.6	23432.8	19852.1	23613.4	23394.9	21529.1	21213.7	21682.7	22284.3	24394.2	18210.7	25075.7	24664.9	30079.3	21585.2	18397	20556.5	20682.9	21607.8
M298.1548T15.67_1	298.155	15.6682	-	-		8807.52	11133.7	9801.68	7589.74	8381	11797.5	11526.3	10999.3	10266.6	10151.1	11665.7	9246.53	8294.62	8635.93	9518.02	8260.91	7185.06	4351.17	8347.08	8197.41	7292.78	11267.6	9287.84	9786.4	15942.8	10052.7	11449.4	10977.9	10372.4	11525.1	10317.8	9592.8	10886.5	13224.6	11470.7	11473.8	12135.8	12518.9	12106.7	11242.4	8019.12	11801.4	9779.39	9846.12
M298.62451T14.08	298.625	14.0821	-	-		7659.87	12584.3	10223.2	7339.63	6789.95	5798.58	8363.83	10008.3	6914.66	6931.87	5833.85	11733	6939.27	5510.74	8710.41	6260.36	7864.1	8592.15	9743.22	5399.4	9033.28	7367.08	5983.63	5726.02	8451.93	8799.53	9414.92	7717.12	9060.22	9144.22	6200.56	8398.59	9761.77	11690	6063.43	10301.9	9514.87	9024.04	9929.81	5462.22	9288.73	9685.94	9160.02	8399.68
M298.64705T15.62_1	298.647	15.6212	-	-		122017	118855	125937	120524	137409	131466	139586	132210	146051	145810	126512	125261	101450	116573	138894	131225	125818	123245	114463	111198	121278	136886	111720	126863	139489	139385	134025	123520	138275	142140	126304	126427	122140	141564	120666	133746	139664	124236	146766	124227	126644	144057	132371	140425
M299.12808T10.14	299.128	10.1414	-	-	[M+H-C6H8O6]+ 474.153 [M+Na+2K]3+ 796.471	3466.2	5499.78	6420.39	3152.6	5383.81	3369.74	5125.65	4901.59	5189.33	6604.82	5521.41	4186.81	2128.05	5115.44	5033.63	3840.99	5756.78	4385.55	6805.19	4793.05	4097.25	3921.81	4925.76	7295.32	5189.68	4252.77	4851.97	6819.79	3163.85	4922.03	4731.68	4598.24	6588.61	5175.1	5983.44	6421.9	7014.9	4899.29	9993.88	4044.93	5248.65	5094.9	5012.34	3672.47
M299.13098T14.75	299.131	14.7463	-	-	[M+2H-HCOOH]2+ 642.249	22664.2	28928.8	19401.9	17754.9	17397.2	19165.6	21131	23186.3	26053.1	17979.4	19710	25950.8	18156	22622.1	23763.3	19517.9	18617.5	22218.7	18839.3	18556.8	18589.9	18537.5	15921	16791.6	25029	23916.9	22709.9	22578.2	23971.1	27565.7	18422.9	22437.1	28197.5	27002.1	25121.9	32882.5	27716	29148.5	30652.3	20175	20232.5	22209.1	21643.3	21448.3
M299.14378T14.53	299.144	14.5346	-	-		39259.1	35868	31117.7	12265.2	31055.7	34581	34394	32510.8	35120.6	36083.7	31728.5	32925.4	34660.2	39291	36069.4	32572.1	23569.2	30519.7	31918.2	27451.2	26543	30268.8	25375.8	30909	35980.4	26675.3	31952.2	24600.8	29002.3	31653.1	24993.1	29711.5	31308.8	31403.9	31759.1	27509.6	31092.9	31227.8	36510.3	21618.4	27676.8	29063.6	31503.7	31303.8
M299.14445T15.24	299.144	15.2386	-	-		9335.14	7394.45	7516.34	6802.9	7106.22	7496.08	6350.9	9103.36	7787.04	7887.1	9055.66	8044.4	8722.75	10115.2	8619.89	8104.01	8729.51	9406.13	9913.28	7363.38	8471.86	8534.74	7898.5	9750.09	11067.4	9086.63	10038.5	9717.12	9506.44	10313.5	9402.61	7598.25	7891.59	9572.25	9841.32	8780.3	9539.95	10647.2	9926.42	8500.07	8600.07	10833.6	12159.3	8811.86
M299.14478T16.65	299.145	16.6498	-	-		7221.25	5128.22	5602.62	4090.15	5946.72	4345.93	5463.31	5706.16	4391.8	5992.88	5389.32	2355.18	4693.8	4655.91	4763.8	5824.22	2328.11	5513.4	4198.76	4747.74	4666.66	6995.63	6180.6	5547.52	4862.2	5845.6	7258.63	7163.99	6191.39	5551.58	7967.66	6458.33	6334.3	7048.01	11788.1	6978.86	7137.33	6206.66	6899.34	6439.88	4919.9	5585.81	5590.67	6779.16
M299.14887T15.62_2	299.149	15.6213	-	-		39918.6	35900.6	36159.2	37842.3	37816.2	36380.1	38885.7	41990.6	44931.4	43826.8	44074.7	38321	33294.5	39078	46018.9	40017.7	35682.4	46712.3	34722.3	38076.4	36926.5	38572.8	32085.9	40219.4	40200.9	39679.9	47036.2	34493.2	38644.7	40158.5	35924.9	39845.2	41077.1	43420.7	33152.8	38830.5	41280.5	43197	45937.9	39570.6	37258.2	43448.1	40936.1	42413
M299.626T14.08_1	299.626	14.0806	-	-		45047.3	58060.2	41100.7	31492.8	35185.7	44104.4	42317.3	39246.6	38197.1	36490.6	26698	51555.4	45199.4	41071.3	72516.8	51707.9	57043.3	59924.4	64211.8	47135.8	63913.1	52899.9	41393.7	48881.1	53343.5	62105.4	58406.3	47117.1	64945.2	51720.1	33488.6	45252.7	57064.4	51701.7	36370.1	48019.8	44452	46219.7	51715.8	35797.9	40168	46742.3	31942.2	42245.5
M299.6325T14.75	299.632	14.7454	-	-		9578.2	9033.04	7147.42	5882.58	6022.68	6578.65	5890.94	9048.71	6661.6	6111.61	7229.88	7189.43	4620.66	9689.48	7978.6	5935.48	6748.97	6844.3	4661.85	5294.69	5984.73	6288.01	4578.73	5262.29	7964.19	6146.74	5883.27	7982.06	8247.17	7523.55	4348.25	7563.99	7786.69	9523.13	6884.03	9955.75	9615.99	8397.95	10004.5	7112.41	6708.44	8693.54	7223.12	9772.35
M299.64527T15.62_1	299.645	15.6213	-	-		51596.3	51991.5	48615.9	50950.4	55307.6	52780.1	58957.4	55786.3	58166.8	56218.5	49734	49855.5	41820.2	47314.5	56213.6	56087.7	49411.3	54149.5	44900	45433.9	47553.6	57260.6	51267.7	50466.8	65133.7	57623.1	59260.6	54918.1	65710.8	64374.8	59828.6	57489	53662.9	59909.1	55448.8	55757.5	63455.3	60986.7	64974.2	55484.3	61157.4	61063.4	58987.1	63734.7
M299.65455T16.79_1	299.655	16.789	-	-		13628.9	13311	13022.6	11857	13887.4	11955.3	11099.1	12714	11472.8	15851.6	13053.5	12312.1	10342.2	13421	13173.3	10604	11466.1	11572.5	11087.1	10815.6	14773.2	13853.8	12520.1	11049.9	13303.6	12940.8	13681.4	15194.5	14956.2	13016.2	13942.4	14039.9	15957.2	14000.1	14608.5	13666.1	16414.6	13792.4	15293.1	12410.2	12633.2	17079.2	15260.5	12904.5
M300.12766T14.08_2	300.128	14.0803	-	-		17515.7	17706.1	12507.4	12092.9	11678	13109.4	13319.5	11755.5	13280.2	10813.9	8746.17	16818.4	16453.2	14355.4	26160.5	16618.3	21319.2	18980.7	24379.9	17859.3	19582.6	17398.5	14024.3	14343.6	17528.4	17992.4	19180.4	15184.8	18552.9	14958	9751.62	14868.9	18134.6	17711.7	11856.4	16174.3	14678.2	15361.5	16638	12678.6	14167	15501.3	9923.45	12389.1
M300.14091T15.22	300.141	15.2248	-	-		14388.7	12819.8	12287.6	10237	12781.5	10475	11548	11596.2	14009.9	13319.5	12954.2	12420.4	10972.1	15846.2	12771.7	11591.7	12312.1	10755.2	8567.01	6691.18	10384.1	10797.6	6982.36	13345.1	11919.1	10272.7	12706.2	9174.09	10221.3	2020.64	10029.6	11267	16680.8	13742.1	11630.4	16118.2	13000.4	13283.5	15766.5	12275.3	10969.9	12559.6	9973.16	14494.4
M300.14247T14.54	300.142	14.5362	-	-		13539.8	11716.5	12181.8	5023.78	10934	16266.2	14415.8	12453.2	10865.9	13709	10910.5	13435.8	15945.4	16128.6	14659.1	12087.6	10981.4	13852.6	14309.5	11935.7	11966.2	12064.2	11625.8	9665.7	14885.2	11082.6	13615.3	9458.83	12520	11919.3	12897.9	12165.6	12287	14602.6	12382.5	13459.7	11632	11991.9	17255.3	10510.8	11117.5	12500.7	11323	11907.6
M300.14634T15.62_2	300.146	15.6212	-	-		17340.9	15884	15382.9	15228.6	16866.8	16466.1	17409	19147.7	15536.2	18802.5	16293.8	17411.1	13763.3	14261	15564.1	16518.7	14639.7	13942	15966.2	11520.6	14499.6	17437.4	16244.2	17949.6	19006	19984.4	20158.1	17611.2	21110.5	18861.3	17694.7	18561	19837.8	19280.9	17922.6	19424.3	21731.7	20681.1	19757.7	18572.1	15845.5	18889.6	21340.7	18006.4
M300.40989T0.74	300.41	0.737823	-	-		8074.74	9459.01	8861.26	9410.97	8192.54	12619	9189.25	6346.78	10696.8	6299.83	6814.4	7568.3	10096.1	9008.77	7769.7	9606.28	8963.78	8922.44	9481.73	9232.36	11695.3	7905.52	11070.7	9671.25	7542.71	6532.99	8502.99	6452.18	6778.78	10039	7060.33	5476.35	10047.5	8404.41	9905.76	6979.72	5831.3	8249.28	7629.34	5205.5	6666.94	5078.91	8438.49	6346.68
M300.62436T14.08_1	300.624	14.0809	-	-		18353.3	28234.3	17305.2	14142.3	14751.8	17872.5	18549.7	19772.5	13519.2	17979.7	9431.19	20136.4	18034.1	16158.3	29471.1	20901.1	22511.1	24787.9	25081.3	16169	24128.9	20925.8	16907.3	15841.7	19205.5	26090	26459	17521.2	22818.9	21146.6	12977.4	19126.1	22860.7	22746.5	17649.6	22697.9	20944.7	22576.8	25866.5	17777.5	20869.2	24795.4	19360.6	19270.5
M300.63388T14.75_1	300.634	14.7463	-	-		67225.4	72784.3	60678.6	52075.2	56938.8	78336.4	62632.6	66872	78165.6	57170.3	59575.8	82028.3	64073.4	78514.8	88129.1	68291.7	71937.5	68863.6	68196.6	58309.5	66866.6	63314.8	49300.8	56938.2	67625.2	78239.3	60635.6	69474	82956.1	74408.5	53167.2	67830.5	76289.6	73745.4	55379.1	86328.1	70487.7	71463.3	81147.6	56093.3	51790.9	61676.9	49962.5	59670.9
M300.63402T14.52_1	300.634	14.523	-	-		56619.1	52137.6	38959.4	28008.8	48199.2	47103.9	31346.7	37977.8	58497.6	48825.5	48972.2	44166.1	37754	62976.2	70939.2	68308.7	62146.4	36579.3	55270.4	46872.8	47008.3	53458.9	28098.6	66369.9	63430.5	56248.5	67243.4	42789.5	48665.3	57327	41882.1	47883.8	59141	58961.1	42719.4	47770.5	81593.1	56322.5	65812.9	46508.2	51539.2	62382.4	45313.2	52927
M300.64203T15.22	300.642	15.2238	-	-	[M+H]+ 299.63 [M+2H]2+ 599.261	4695.41	6238.98	4797.15	4010.85	4414.79	5368.02	3974.26	4336.28	5784.47	4866.4	4947.51	4509.71	4201.96	4867.89	4668.56	4811.37	4226.2	4683.37	3911.77	3526.67	4617.31	4299.4	2547.92	4199.96	4541.42	4407.42	4863.81	4003.96	4747.86	5167.15	3599.67	3800.17	6170.64	5445.08	4127.38	5905.71	5355.94	5048.5	5366.14	4788.77	4499.91	5394.08	4652.68	4849.63
M300.64476T15.62_1	300.645	15.62	-	-		8890.5	9268.49	9785.86	9381.24	8766.33	9482.53	9921.2	9982.58	12011.7	12269.8	9849.31	9654.97	8405.23	8336.35	10746.2	9534.43	8995.99	10107.7	10092.7	8010.63	10059.7	11301.4	8276.9	10028.8	9870.39	12563.8	11388.1	10640.9	11278.6	10635.4	7962.9	11459.2	9876.79	12974.2	10113.1	10468.9	12359.4	11261	12308.3	9676	9453.87	11004.3	11300.7	13058.5
M300.65274T16.79	300.653	16.7882	-	-		6949.17	7241.2	5660.86	5819.9	6028.45	6204.62	4700.95	6012.5	6294.16	6151.77	7953.15	6912.86	6303.24	8439.85	5487.66	5707.24	6777.64	4291.93	7008.87	4529.59	5063.91	7633.13	5054.74	5974.11	5747.24	6420.6	5866.1	6377.97	5966.27	6378.9	5747.57	5632.42	5997.89	8327.93	7797.03	7818.98	7615.56	8811.56	6015.15	6772.54	5652.15	6692.63	6417.63	6373.85
M300.97034T9.12	300.97	9.12289	-	-		10647.4	9839.1	10274.8	11004.8	10603.8	9766.9	11006.4	9404.33	11532.9	10063.9	9300.23	12635.1	11656.1	11378.2	9767.37	10005.7	10339.5	9644.41	10885.3	11948.4	10110.4	9741.07	10063.2	9739.24	9696.74	9117.58	9733	9286.2	10927.4	9065.66	9987.69	9655.75	9184.8	10669.9	9818	9687.21	9750.93	9998.42	8746.03	10964.4	10288	10572.4	9671.33	10617.9
M301.02469T9.06	301.025	9.06329	-	-	[M+H]+ 300.018	8811.7	8490.87	10279.7	10438.6	10962.6	9271.56	10875.9	6191.29	8475.5	6052.73	8870.29	8923.84	4893.81	10456.2	7962.8	10330.3	8922.88	4048.04	9173.83	11298.6	7952.96	10994.1	4399.12	9308.55	10061.1	5174.06	10184.1	10413.9	8034.6	6846.63	7905.89	8901.27	8052.85	10556.1	7677.03	11797.4	8842.19	7253.91	11659.8	9723.27	5582.29	10986.6	3271.19	9604.4
M301.02965T0.93	301.03	0.92894	-	-	[M+H]+ 300.02	5996.6	6805.25	5914.47	3788.34	6280.48	5048.08	4643.68	8531.07	6245.71	6286.54	5513.6	6182.12	4820.93	7022.14	6179.33	5414.01	7147.95	8097.11	5023.24	5793.26	5872.95	6358.98	6004.73	5725.47	5502.67	6190.35	5504.73	6008.66	7756.94	6047.17	5831.33	5297.06	5528.26	4969.08	5477.39	5568.7	6115.76	7457.91	6293.88	5519.92	4944.29	8349.11	7592.64	5351.05
M301.0778T6.7	301.078	6.7026	-	-		-7925.51	-6715.16	-2842.26	8509.36	-426.649	9505.58	9153.46	12278.8	-8015.24	10171.4	-7216.84	11154.4	-1735.91	9413.47	1448.53	15490.7	13961.6	10841.4	-6561.19	9598.03	-5428.33	9784.63	1002.94	-1210.78	11169.7	11472.2	8495.09	9436.93	-5942.24	1290.48	-7333.08	126154	9545.01	9558.27	9381.18	318.734	10829.1	1790.13	-8178.39	-5955.5	8474.35	1015.17	9844.8	-2753.55
M301.13553T14.75_2	301.136	14.7472	-	-		21169.1	24612.7	16776.2	14896.5	17685.5	26120.3	23279.9	23812.2	28016.8	19126.6	22861.9	26251.2	22153.1	30418.4	29528	24068.2	26302.7	25778.1	25555.7	20336	24283	21189	18830.8	21586.1	23922.5	23394.2	23707.3	21816.6	29007	27086.1	15452.9	23207	25354.1	22906.9	20499.7	29791.7	23066	24773.2	25903.6	19871.3	17165.8	21580.4	18638.9	19382
M301.1358T14.52_2	301.136	14.5232	-	-		21298.7	19942.9	14299.7	9782.22	18933.3	16794.7	13699.6	15111.8	21467.9	17640.1	16293.9	15165.5	15073.1	21927.3	24907.5	22167.2	21864.5	14789.7	19267.8	13339.7	15671.9	17885.5	9563.16	16465.6	21162	18715.5	21196	13939.6	15210.2	19347.7	13546.6	16303.3	19745.2	18116.3	12993.8	16405.1	25420	19275.5	21366.7	15299.8	17386.2	19994.2	17366.3	18832
M301.21618T15.33	301.216	15.3274	-	-		8980.53	18087.1	9957.67	15362.1	10842.5	4675.61	9595.18	9405.97	11011.7	629.387	9869.69	11874	8529.13	10737	10607.8	10065.3	15002.8	10468.6	11400.5	9167.82	7036.98	10112.8	8844.52	9671.89	5458.09	10278.3	15934.8	10440.6	12652.7	10351.5	7799.17	9719.53	9721.79	9558.35	-803.458	9839.52	17949.6	10417.4	6271.36	9866.42	9646.25	10336.6	9892.88	9504.04
M301.57927T12.92	301.579	12.9192	-	-		1591.49	1255.37	1515.55	1220.61	1193.11	1465.92	1556.11	1317.7	1157.14	1303.65	1401.28	1292.51	1096.98	907.985	650.074	989.726	1660.81	1107.69	993.688	1586.89	1235.63	1427.28	995.727	1892.69	1671.28	1680.78	1440.63	1535.78	2136.41	2089.48	2150.37	1670.43	1763.95	2157.84	1739.31	1133.86	2112.03	2123.23	1785.58	1134.88	2369.19	2116.66	1344.2	2159.64
M301.63215T14.52_1	301.632	14.5223	-	-		25674.3	25712.7	19660.7	13125.9	24051.7	20274.9	16819.6	17509.1	25007.1	22952.3	24951.6	21441.6	17913	29746	30051.4	33111	25022.8	15950.5	22875.4	21201.7	20012	19577.1	12002.5	25261.3	25739.4	18509.6	27602	19094.6	16326.2	20987.5	15624	19721.7	22304.4	19768	14492.7	18518.8	31040.6	20882.4	22408.7	19258.5	19321.3	27187.7	18908.4	19632.2
M301.63216T14.75_1	301.632	14.7462	-	-		32041.6	30685.2	26975.1	22884.9	22564.7	29601.1	28966.4	31110.9	33811.8	24344.3	20951.8	34719.5	28223.1	35511.1	35546.5	27634.2	31417.6	32710	29138.1	22073.8	29432	27438.8	25064.7	26242.7	30174.1	32986.2	29898.1	27226.3	37982	28255	24245.1	29553.1	34621.3	35706.6	27476.1	40530.9	29984	34431.6	37771.3	24946.9	25225.8	27945.2	23891.8	27060.8
M301.64171T15.22_1	301.642	15.2206	-	-	[M+2Na-H]+ 256.675	40129.6	38362	30180.9	28696.9	46041.8	51434.6	42121.1	47553.4	57237	42848	46493.7	41373	31096.6	51056.8	49150.7	52830	49023.9	43177	39405.8	31635.3	45470.6	44692.8	23608.1	46465.4	43162.7	36664.2	48168.4	33567.4	45751.5	48304.6	32707.5	38327.6	53950.8	50750.3	32842.3	55635.9	55385.9	49645	55285	41385.1	40119.2	50777.4	32010.4	47717.7
M301.64176T15.02	301.642	15.0195	-	-		8457.92	8543.53	6843.87	5468.34	9010.12	7227.86	5741.75	8330.1	10388.9	9876.7	8837.56	10601.9	5533.47	13641.6	11083.4	10354.3	9154.16	6766.39	8207.4	4890.04	9313.97	8559.61	6321.92	11752.4	10466.9	9104.31	9342.46	5822.57	8194.4	9863.6	7379.2	7167.67	10806.2	9232.65	5609.76	8971.75	11278.9	7922.16	9810.6	7749.63	7836.58	7874.29	6900.76	8875.83
M301.65211T15.99	301.652	15.9899	-	-	[M+2K]2+ 525.381	4568.77	5041.93	5238.62	4210.12	4639.06	5082.4	5763.34	5080.57	7107.73	5374.97	5518.62	4895.57	4030.63	4603.5	5596.36	6702.37	2859.32	4416.72	4407.71	5052.29	4774.63	5046.08	5341.23	3786.59	5908.63	3817.01	5492.64	5148.82	3933.16	4810.34	3595.63	3805.31	4744.43	3685.1	5003.13	3837.64	4184.74	4498.48	4498.73	5822.67	3468.6	5813.81	4659.25	6373.26
M302.13328T14.75_2	302.133	14.7458	-	-		9154.99	10399.7	7672.31	5807.93	9409.54	11499.2	10121.9	11856.8	11188.8	8545.71	8038.87	13209.8	10266.4	10572.7	10807.2	8831.5	8824.78	11162.1	11138.8	6902.6	10141.2	9444.19	8536.89	6142.27	10039.8	11655.3	8998.62	8777.65	12645.4	11430.5	8078.1	11740.1	10540.2	10603	9536.12	11979.6	11076.9	12450.6	12259.6	7857.35	11562.9	11022.5	10320	9730.81
M302.13343T14.52_2	302.133	14.5212	-	-		7991.32	7548.15	6475.37	4207.29	7740.96	7386.07	6375.02	6746	8515.18	7372.38	8980.75	7262.07	5605.4	11975.1	11630.4	10203.5	8106.85	5563.26	7341.61	6632.66	6885.05	8824.49	4334.72	7934.48	8542.36	6535.06	8099.96	5463.07	6185.65	7679.42	4301.6	5742.03	7793.33	7013.15	6194.25	7186.88	12658.2	7350.76	8095.77	6774.28	6048.06	9221.76	5662.38	8369.64
M302.14322T15.22_2	302.143	15.2206	-	-		12873.8	15801.7	12116.9	10289.6	13261.2	14450.6	15345.7	15112.1	16105.4	14207.1	13963.1	15149.1	9001.76	16053.9	18881.3	16649	13950.1	15411.9	13931.2	11904.5	14827.3	15468.9	9278.85	17697.2	15703.7	13264.3	16745.7	14512.8	15895.1	14339.5	12395.3	14548.4	17249.6	16600.9	12515.8	18711.1	19291.7	15690.8	21599.3	13405.6	12424.8	15772.8	9121.19	14407.9
M302.19644T12.21	302.196	12.2119	-	-		4296.87	4130.23	6290.43	3505.13	4938.23	4902.45	5232.03	5218.18	3634.21	5751.16	5452.86	5699.67	2882.77	5608.44	2592.06	6749.01	5275.94	5024.41	5192.4	4232.24	4373.46	5051.74	3729.84	6470.08	6190.13	3679.35	5210.71	5483.22	5421.45	5575.64	4338.2	5093.99	6100.36	5264.5	4337.27	4746.92	4855.78	3656.92	7037.5	5523.25	5419.5	8885.87	2866.23	6042.03
M302.44342T0.74_2	302.443	0.741153	-	-	[2M+Na+K]2+ 271.469	9029.63	9981.59	7754.02	8284.85	10164.5	9909.42	9511.15	8342.74	8030.56	9678.48	7661.03	7492.36	10729.3	8300.21	8930.47	9097.05	9200.25	8059.43	9413.16	9977.08	7978.17	9400.55	8477.74	7295.5	8921.84	9526.79	9494.12	8391.5	9580.99	7779.2	8885.3	7812.06	8923.54	7850.79	7359.07	9096.97	10208.7	9180.63	8840	6728.87	8422.6	9219.37	7434.09	8738.32
M302.62273T14.08	302.623	14.0777	-	-	[M+2H-CH3]2+ 618.251	3674.87	4215.22	1911.97	1933.25	2105.42	1730.07	2148.9	2060.22	2316.34	2188.51	1754.96	3062.48	2487.75	1916.28	2383.74	2812.91	2866.4	3268.99	3415.58	2051.03	3261.59	2650.87	1690.81	2845.71	3537.28	3827.16	3475.6	3014.82	3067.1	4792.88	1818.5	3119.21	3514.06	3599.49	2513.39	3477.45	4146.05	3284.48	2641.25	2328.29	2454.91	2107.19	1743.29	1587.31
M302.63984T15.22_1	302.64	15.2202	-	-		18526.8	17670.2	14522.1	14430	19818.9	15458	19292	21111.8	20552.4	18123.6	19135.6	16483.1	12125.7	17822	19496.9	17958.3	19880.4	18401.7	16029.3	10442.9	20977.3	19048.2	12629.8	21036.2	20566.6	17333	21381.5	17125.8	20956	18831	14002.7	18224.1	25524.8	23190.8	17592.6	24262.5	25873.3	22906.6	24495.5	17845.4	19658.2	20470.2	14908.9	19092.8
M302.64871T11.81	302.649	11.8068	-	-		4655.17	7534.37	2343.25	4944.86	5482.76	2574.14	1771.15	4301.24	5698.9	5957.96	4576.77	4238.63	6168.82	1758.67	4431.72	6112.33	2620.41	7676.4	4770.96	5836.61	6964.51	5274.81	6346.84	3616.52	5150.66	7592.76	2869.08	6252.41	4162.5	6869.67	3582.74	2419.1	5191.55	5871.49	6927.05	5538.78	6829.89	6261.06	7420.91	4832.18	5664.96	6549.77	8050.99	7650.69
M302.65042T15.99	302.65	15.9935	-	-		13596.4	16443.2	13928.3	13790.1	12279.6	11695.1	14495	14603.9	14774.9	16537.2	17102.8	12220.1	12009.5	12864.4	12291.6	14376.3	9450.63	12354.8	13797.5	10230.8	12882.4	15451.4	11658.4	14385.8	14598.3	17054.7	15100.4	12190.3	11982.4	14091.9	12530.9	11444.2	16768.8	12653.7	15164.1	14657.6	18497.5	16855.1	16531.6	13292	10757.7	15658.8	13622.6	15808.9
M303.04022T9.19	303.04	9.18966	-	-	[M+Na]+ 280.054	10163.9	11179	11538.8	6015.43	11843.2	8681.73	11768.7	12726.8	11475.6	12349	9818.74	12077.5	9242.18	10531.8	10079.6	6852.23	10331	13763.2	9408.66	11476.3	9932.9	5443.6	9014.77	1519.62	4687.55	12514.6	9112.65	10678.8	10933	11015.2	10335.2	11228.9	11493.6	8783.21	15712.8	12780.5	12709.9	11585.1	9751.14	12963.6	13544.8	12749.4	10595.2	13812.5
M303.15215T15.99	303.152	15.9905	-	-		5588.59	5495.61	8708.7	2500.06	7410.86	529.573	7051.29	7132.4	5475.82	2506.98	16398.6	18224.4	6475.08	8145.35	6256.47	6209.48	437.577	-50.0989	3838.7	6172.88	4299.66	7742.74	5985.43	7606.73	19931.8	6778.27	1861.04	5657.51	12286.5	6009.17	4998.04	5536.33	7675.48	7512.26	2449.61	6379.13	33592.6	7134.88	5248.31	3785.28	6920.72	7789.73	6457.77	8163.65
M303.23186T18.2	303.232	18.2031	-	-	[M+H-CO]+ 330.22	12015.3	6484.93	13596.7	5373.63	14286.3	12264.5	7259.94	12611.6	14196.4	14712.4	9636	10184.9	7854.18	13448.5	10846.3	11489.3	10391.8	8195.28	13341.3	10487.3	17719.7	14100.1	12004.3	12936.1	17074.2	8582.07	13354	14358.6	15263.6	12367.9	11831.9	6681.15	13423.7	17012.7	13306.2	13010.8	11435.1	11975	13171.6	12598.7	14835.6	16319.6	5006.24	10737.4
M303.23191T16.06	303.232	16.057	-	-		10947.9	18347.6	12163	15494.6	10887.8	8100.2	12978.2	13063.8	11922.3	4704.18	15816.4	5609.11	12077.3	10186.3	12315.1	11313.3	11582.1	4480.8	10658.8	12360.7	8406.39	14202.1	13099.9	10899.2	10240.2	13388.8	14608.7	12164.8	13469.4	11932.7	8941.6	12466	9976.75	9827.93	9586.72	12346.5	27078.3	12718.5	10862.7	15822.6	13714.8	12755.7	13158.5	12674.4
M303.44296T0.74_2	303.443	0.739992	-	-		4071.49	3196.61	4054.52	2828.2	3664.71	3988.08	4525.82	4272.86	4972.35	5341.75	4618.4	3757.69	4005.62	4065.87	4195.67	4875.18	5015.79	5623.94	5131.66	3896.35	4182.29	3106.24	4300.36	3127.1	5185.27	4134.21	3687.64	5497.71	4102.04	4457.16	2719.54	3721.86	3108.31	3053.56	2682.57	4106.94	3871.55	3990.59	4200.3	2813	3485.89	3845.4	3744.46	4296.52
M303.64839T15.99	303.648	15.9945	-	-		3781.09	4076.14	4109.75	4370.22	3596.2	3397.61	4229.48	3188.99	4057.5	4364.27	5421.34	3085.35	2889.14	3727.29	3229.61	3865.54	3331	3046.67	3127.1	2959.3	3004.9	4817.18	2465.75	5270.65	4184.76	5595.97	3681.32	2636.49	3903.35	4665.06	3305.78	3776	4829.69	4617.6	4635.66	4045.99	6154.73	5115.97	5192.53	4823.29	5007.6	5796.95	5337.35	5851.38
M303.64918T15.25	303.649	15.2542	-	-		5288.48	3949.48	5526.7	4261.84	6373.93	5026.48	5242.81	4347.7	5137.95	5040.24	5379.02	6379.43	4909.1	4952.39	3740.82	5853.37	4616.41	4773.43	4858.09	5098.26	6276.15	5857.08	3856.29	4055.31	5523.34	4442.97	4633.27	4437.96	4856.64	4955.04	4900.66	5302.17	4073.55	5282.08	3959.54	7092.79	6264.84	4188.59	4722.68	5558.44	5504.81	5527.49	5134.08	4698.82
M303.6569T17.07	303.657	17.0728	-	-		2829.39	3959.15	2625.57	2754.38	2863.75	3723.4	3918.68	3154.85	3112	4170.4	2831.88	2664.97	2570.39	2988.79	3026.34	3313.47	2669.49	3585.82	3218.84	2144.97	2664.59	3460.74	2444.85	3561.13	2672.48	2799.91	1746.4	3564.54	2315.52	3483.36	2401.94	2884.29	2857.29	3209.18	2600.7	2933.26	3828.25	4006.66	3446.92	2122.04	2652.15	2753.19	2420.03	3331.83
M304.15452T15.99	304.155	15.989	-	-		28559.5	25401.2	30771.6	22647.2	25694.2	14279.9	21239.5	23969.5	26227.3	27918.5	30765.3	23921.7	20469.5	23917.5	23663.6	24191.5	17310.8	18145.9	21662.7	21161.9	26060.7	26373	26147.4	21662.4	26284.2	25575.3	31282.1	27972.6	26296.2	27565.3	24923	22976.9	29331.4	26995	37826.7	24653.8	35249	31073.3	31539	23968.9	26544.6	30224.9	32336.9	24705.6
M304.15466T15.73	304.155	15.7284	-	-		14581.1	17069.5	14097.3	13215.4	15873.1	9739.02	12214	13414.5	12321.7	13607.6	16195.6	16219.2	10584.7	13186.1	12461.8	16362	10413.6	11500.7	11758	12228.7	10299.4	11031.1	12504.6	13392	11828.9	13342.7	13057.3	12546.9	15047.2	13108.2	13499.3	9727.11	13926	11967.9	17835.3	15180.8	15264.7	15618.4	13593.8	12962.6	12433.3	14918.2	17362.5	12549.4
M304.64941T15.24_1	304.649	15.2396	-	-		57399.5	54014.5	57675.3	46015.6	53501.3	51611	55487.2	55607.4	54127.3	59776.2	55238.7	47052.1	48998.3	51588.1	46279.9	49069.3	40067.5	45337.3	46347.6	40971.6	42131	46170.2	49718.3	53392.7	63260.8	54023	52176.6	49731.2	51042.7	51722.7	51948.3	50845.5	56320.1	52530.2	50509.2	50929	56027.3	57792.7	61353.3	52449.4	53112.7	53493.9	59227.4	49489
M304.65421T15.03	304.654	15.0345	-	-	[M+H+K]2+ 569.346	4992.73	5069.93	5230.74	5070.99	4995.74	3729.3	5014.34	4248.51	4867.38	4532.58	5680.55	6343.71	3827.73	6055.69	5128.81	4301.75	6536.39	3774.82	5433.12	3180.97	5970.36	5791.83	3921.61	3624.63	5806.55	6670.94	6353.26	4055.72	6224.89	5270.77	4087.69	5783.96	5403.1	5884.83	5097.39	6670.96	6599.15	6247.67	6691.27	4579.28	6288.83	6869.18	5764.41	5089.11
M304.65579T15.99_1	304.656	15.9893	-	-		10764.6	9859.59	9615.42	5113.78	8923.08	5941.26	6100.01	6998.21	8914.19	9113.04	10276.6	7846.83	5603.48	9689.35	6468.35	8338.03	4886.52	7281.15	6911.59	8023.73	7125.53	7893.39	6888.8	8755.54	8851.74	7863.71	9279.9	8887.35	8234.68	9614.29	8099.79	8314.62	10718.9	8891.02	13677.4	8892.98	10612.4	12192.9	11143.2	8098.5	9085.96	8504.29	11464	10179.9
M304.65616T15.73	304.656	15.7287	-	-		7022.66	5990.21	5616.44	4283.74	5742.87	4120.71	5180.94	5555.21	5208.65	5718.32	4717.76	5183.56	4783.82	4957.49	4340.69	5655.23	3988.61	6710.04	4235.24	5239.95	4330.93	4980.74	4554.95	5453.1	4471.75	5482.29	6327.07	5274.92	5327.85	6371.66	5398.34	3732.9	5330.82	4167.69	7316.04	5429.69	5690.61	6763.14	5051.35	4852.61	5064.05	4659.65	4847.38	4287.8
M304.66462T17.22	304.665	17.2219	-	-	[M+H-H20]+ 321.669 [M+H-C2H4]+ 331.68	4199.22	6351.85	4878.76	4567.73	4117.49	5791.4	3434.17	4451.89	3562.32	4451.4	4825.9	5312.08	3276.43	3645.39	4077.99	4026.81	4668.03	2474.52	3884.26	3774.3	2731.13	4721.04	3956.28	3484.84	2816.13	3726.55	4593.92	3122.14	2863.42	3470.27	2953.09	3376.2	4188.73	4038.21	929.981	3904.32	4844.57	3625.55	3312.48	3468.64	3710.59	4073.78	4560.24	5158.18
M305.15073T15.24_2	305.151	15.2377	-	-	[M+K]+ 266.184	23389.7	22014.1	20439.3	18116.1	20776.7	18460	20756.5	21531.1	18605.4	19702.5	23275.4	18892.9	16071.6	17583.9	19220	16921.1	16254.8	17578.8	20482.8	15773.1	18830	17879	19895.8	20673.7	21546	19267.2	19006.8	22522.3	4037.69	18218.5	18619.6	18361.1	15370.8	20840.7	19486.6	17677.9	21400.4	20273.1	20957.8	21239.1	19987.9	19822.4	21883.5	18886.9
M305.15308T15.99_2	305.153	15.9885	-	-		12643	12151.1	14511.2	11066.4	11792.9	8223.73	8921.62	9202.86	13534.2	11454.3	14246.2	12778.7	7703.78	12334.6	12487.9	12723.8	7380.43	8376.73	10508.2	9363.2	10954.7	11112.5	11883.7	9526.76	10031.3	10952.4	15799	12104.7	10132.7	12762.2	11994	9938.53	14718.3	11861.6	17380.4	11735.9	14223.6	14391.2	12640.5	12005.7	12724.6	12113.8	13682	10854.3
M305.44594T0.74_2	305.446	0.740342	-	-		2355.97	2179.02	2878.78	1558.82	1334.79	3052.14	3212.19	2008.77	2253.04	2673.36	2378.46	2707.23	2953.56	2742.71	2877.67	3070.25	2642.94	2996.85	2795.83	3411.97	3285.74	3194.7	2775.88	2596.18	2276.31	3073.53	2472.32	2264.6	2971.73	2284.01	2197.76	2716.31	2309.22	2050.57	2620.83	3453.42	2687.52	1996.79	2542.27	1787.44	2638.79	4416.64	2584.14	2277.42
M305.65161T15.24_1	305.652	15.2414	-	-		7160.52	4794.55	6036.06	4343.47	5233.03	3712.91	4957.53	4169.27	3884.62	4314.08	4969.01	4916.12	2903.14	3569.79	3823.38	4925.8	3589.58	3388.47	2821.1	3420.94	3940.76	3692.17	3025.06	3389.74	4456.71	4931.51	4072.05	5339.1	4299.38	5457.68	3788.24	4161.23	4388.56	5090.02	5268.21	4530.9	5207	4806.93	5101.21	4634.47	5135.79	5513.36	5246.37	5986.32
M305.65393T15.99	305.654	15.9862	-	-		4291.88	5155.68	4134.43	3716.59	3540.31	3224.59	3997.23	4745.99	4312.3	4409.55	5752.41	5012.41	4108.09	4153.17	4305.89	4729.2	2288.49	4444.61	3205.3	5159.83	4245.21	4154.52	4754.88	4072.63	3968.8	3362.97	5835.05	4098.09	5025.2	3465.36	3682.84	3768.35	4173.03	3876.18	5615.5	4543.11	4989.27	6768.1	4033.67	4147.98	3499.59	3900.57	5746.66	4334.75
M305.96245T0.74_1	305.962	0.739547	-	-	[3M+2Na-H]+ 86.991 [3M+2Na-H]+ 86.991	6181.9	4275.01	5133.67	3811.08	4050.65	4112.09	4739.13	4941.66	4885.23	5757.56	5823.15	4683.53	5842.14	6490.75	6996.27	5316.13	6562.05	4903.6	5280.46	5462.75	4425.13	5644.59	4729.18	6550.03	5889.13	8216.04	5723.69	7448.97	7548.77	4735.59	5177.05	5360.68	4351.64	4580.57	6395.79	5800.14	7452.21	5399.22	7267.93	4892.3	5143.12	6942.76	5221.79	6016.81
M306.02999T8.83	306.03	8.83275	-	-	[M+H-CO]+ 333.018	3068.25	3574.89	4606.16	3546.8	3343.09	3273.77	3460.12	2568.77	2793.27	2663.2	3303.63	3121.17	2104.29	3700.53	4389.53	3190.98	3092.18	3245.49	4678.78	2840.57	3149.28	3486.34	3021.9	1564.99	4277.05	2733.48	2981.47	3508.44	3091.26	3291.8	3012.38	3192.64	2929.99	2984.51	2410.97	2662.51	2934.64	3710.39	3540.87	2234.42	4068.75	3280.75	3287.89	3592.33
M306.15247T14.98	306.152	14.9794	-	-		19211.7	16659.1	17114.9	9160.63	16868.1	19913.4	19721	17576.9	17000.5	16499.3	13689.1	17127.1	15090.2	16284.7	14695.8	14990.4	10359.5	12644.9	14570.7	9409.22	12173.4	14148.7	11767.3	15376.3	19758.7	12288.4	15170.7	14045.5	13728	13404.3	12021.2	14915.1	14773.6	13203.9	16760.3	13530.2	12407.3	15029.7	19315.7	12240.1	14215.2	13236.2	17745	17374.8
M306.15247T15.24_2	306.152	15.2396	-	-		220904	203118	212906	166212	217354	240288	261165	236259	231029	224073	210931	226261	221689	229123	227843	219744	205181	209406	229487	188120	199942	212207	214169	217774	238546	203881	211684	206578	217039	216661	196180	194290	202320	201857	222591	208045	212738	224151	231735	222186	195406	216476	222647	207948
M306.46297T0.74_2	306.463	0.739701	-	-		3940.38	2687.22	4651.91	2497.25	2153.29	3246.49	2738.39	3138.77	3576.69	2909.78	1805.94	1872.69	2283.69	2769.21	3225.67	2999.99	2622.08	2523.26	2742.72	2595.79	2233.53	1860.39	2023.94	1940.71	2970.21	2876.2	1719.24	2447.32	2699.19	2822.97	1843.8	2028.63	2238.94	1797.53	2014.68	3291.92	3280.18	2045.55	2658.17	1949.4	3122.27	3090.2	3739.98	2766.3
M306.65403T15.24_1	306.654	15.2396	-	-		69087.3	65285.4	71749.5	54732.8	72975.7	86704.4	87939.6	71379.1	78488.8	70728.5	64908.7	70085	72125.2	73620.3	75677.9	78885.4	67497.8	70560	78516.6	64793.2	69642.6	72246.9	68201.4	72719.2	75264.2	73250.2	72954.7	70777.5	75608.1	73021.6	68828.1	64521.6	68638.7	62980.4	76967.3	72501.2	75797.7	76215.5	79845.7	71972.3	65352.7	69764.6	67185.6	67576.2
M306.96205T0.74	306.962	0.741153	-	-	[3M+2K]2+ 178.664	4437.57	3629.69	3730.29	4978.32	2788.87	2956.02	3991.8	3715.73	2728.44	3338.65	3896.26	3966.8	3576.8	2916.95	4652.32	4040.76	4151.31	3017.26	3255.72	4042.54	3385.64	3811.24	3477.31	4053.47	3418.19	4814.35	2676.35	3463.89	3587.94	2896.68	3409.34	2584.32	3109.89	2520.04	2574.61	3868.1	3823.67	2955.62	3320.27	2847.48	3154.64	4901.95	3412.68	3508.78
M307.11377T1.2	307.114	1.20392	-	-	[2M+Na]+ 142.063	46261.8	48848.8	47957.8	36458.7	45043.2	52450	54144.2	44084.1	75152.8	39943.5	28104.7	36415.4	52095.8	49901.6	48353.4	44362.3	55090.9	36326.1	45664.2	48119.3	56185.9	53485.3	48705.8	42209.4	56487.9	63109.2	60848.9	49350.2	46388.1	50693.6	45361.4	49582	45996.9	55224.5	44566.4	51173.6	75871.9	64338.4	51791.6	37196.2	43131.1	46642.6	48909.5	53022.5
M307.15074T15.24_2	307.151	15.2396	-	-		100251	91521.4	96244.5	71154.4	92099	108929	113345	103296	99557.5	98197.5	89869.7	99315.7	103675	95884.3	93441.5	95573.9	88547.2	94117.3	99048.8	86859.1	87457.7	92772.6	93556	88463.9	105540	92052.8	87959.3	89618.7	96620.8	97498.7	91636.8	88676.1	91660.6	91106	97009.5	92973.4	93836.9	103289	105649	93484.5	92095.4	97288	100896	97955.6
M307.15097T14.98	307.151	14.9818	-	-		9953.92	8242.59	8400.65	4640.97	6856.77	8311.88	8183.04	8742.5	6628.66	7755.19	6622.09	9545.65	6960.55	10037.8	7563.4	8635.98	7576.56	6454.72	7956.97	4985.32	5796.73	5971.69	6900.84	9550.3	9940.19	6486.53	7488.7	6595.5	7158.14	8380.95	7665.83	5933.82	6906.93	5926	7084.14	6124.08	6087.21	7322.08	8685.39	6661.29	6244.35	6630.29	7417.28	5509.15
M307.6518T15.24_1	307.652	15.2397	-	-		36122.5	32513.9	33124.7	27960.6	35628.9	37484.5	36869.1	35682.9	36840.7	40867.4	31055.2	37311.2	37181.4	35729.2	38114.9	37501.6	31105.3	30550.1	35137.9	30556.6	34436.3	33004.8	33126.6	38168	41023.1	34324.7	31957.4	33708.6	33462	34317.4	33695.6	31311.1	33912.8	31106.6	35582.3	29401.4	29225.9	31020.7	37418.3	29895.5	28976.6	30942	30314	29350.3
M308.11717T1.21	308.117	1.20625	-	-		8056.12	6806.09	6457.29	5933.91	6563.87	6463.89	7242	5989.69	10765.6	6592.61	4306.35	5528.51	7189.73	6657.15	5987.92	6334.15	8069.56	5426.08	6687.09	5929.47	8243.88	7029.42	5925.69	6266.76	7178.34	7584.07	7691.78	7372.27	6681.8	7472.48	5425.09	5406.91	7458.8	6773.02	6512.46	6920.77	8762.13	9391.71	6849.65	4214.1	5981.65	6316.02	6677.83	7130.37
M308.15037T15.24_2	308.15	15.24	-	-		18994	15651.6	17499.3	14606.4	18362	22281.8	20553.8	20173.9	17033.1	17130.5	17389.9	17737	17361.1	19111.5	17137.9	17928.1	16581.5	14198.1	16778	14044.5	15327.3	15532.7	16043	16510	21891	19800.3	18330.4	15651.1	19303.6	17908.7	16934.3	17852.5	18960	17370.6	17867.3	17430.5	16647.1	20011.2	20451.3	17637.1	16762.7	17572.8	15825.6	18025.8
M308.18579T13.22	308.186	13.2238	-	-		-887.377	-117.535	166050	68429.4	49035.7	27202.3	22123.8	120588	64154.9	13418	91224.2	13305.6	-10674.9	19839.2	9599.03	58160.7	43074.6	14575.9	10120.3	51916.6	111750	3781.78	125723	-11163.8	14102.5	6243.19	48526.9	5119.64	9487.8	-10855.9	52748.7	-3871.12	7625.79	4863.72	32184.4	39174.5	13561.5	2239.76	6408.43	-1191.15	44397.2	-11008.8	3004.66	3416.37
M308.65107T15.24_1	308.651	15.2395	-	-		5257.31	6542.25	5985.3	4733.19	5283.27	5925.52	6876	6188.18	5645.46	5466.07	5423.83	6686.77	6525.18	5500.61	5882.88	6914.1	5319.13	5738.5	6346.87	4620.95	5510.03	4325.42	4625.3	6617.22	6699.93	5960.44	6194.1	4823.19	6612.82	5327.3	4997.58	4156.89	5184.23	4332.88	5359.79	5449.78	4129.93	5912.89	5079.31	5140.19	4394.09	4769	6425.88	5010.93
M308.66036T16.79_1	308.66	16.7929	-	-		21062.1	21282.5	19197.6	20587.5	22235.5	22296.8	22829.4	21579.8	22489.5	22929	24529.2	20716.1	22354.8	22530.9	23000.1	21074.6	18710	19159.8	23294.2	18853	20164.4	21198.9	19244.2	20474	21741.3	22081.8	21886.9	19011.1	23386.1	19979.8	20168.1	18696.4	20551	21459.2	24135.9	23961.8	22543.5	22837.8	20427.2	20259.3	22379	21612.1	23719.6	23674.3
M309.02145T9.12	309.021	9.12158	-	-		2384.81	2003.4	1441.92	2228.94	1613.37	2325.25	2269.29	2060.85	2259.54	2437.18	2172.08	1998.46	2588.09	2197.89	2777.81	2228.91	2318.05	2306.27	2561.34	2673.89	2819.68	2211.21	1973.53	2840.67	3101.05	3298.42	2917.69	2246.3	1995.11	2520.87	2797.48	2406.29	2346.4	2828.98	2244.85	2730.89	2178.37	2558.6	2389.28	2965.56	2210.39	2817.3	2416.71	2719.88
M309.03006T11.15	309.03	11.1515	-	-		21828.2	19385.6	17338.2	7035.62	19502.9	14438.3	16943.1	17851	17049.1	17980.1	23594.1	16739.8	16129.4	15445.4	16985.3	15437.4	16126	17406	10663.7	14938.5	12176.4	14026.8	12496	10525.3	10611	15162.6	17291.9	20349.5	14968.9	14474.6	14117.3	12441.9	14449.6	14506.8	16892.5	18391.8	18980.9	13799.5	19529.5	16455.6	16000.7	19761.2	15971.2	19236.6
M309.12949T0.94	309.129	0.937834	-	-		3947.32	5382.5	3749.27	2755.17	5339.74	3307.76	3141.53	6213.98	7352.31	5401.52	4200.38	3735.71	4788.44	2836.32	4031.82	3347.53	3451.29	3086.74	3025.68	2964.31	2842.91	2725.46	1998.15	3293.03	2947.77	2617.38	5018.08	2118.01	3852.14	2990.3	2340.22	4199.35	4473.14	4509.57	2792.33	4081.32	3903.93	2664.48	4062.49	2962.08	5603.22	4713.18	4536.85	3238.24
M309.16226T16.8_2	309.162	16.795	-	-		7876.91	7383.77	7236.77	7725.27	9725.57	8286.01	6748.04	8182.53	8100.03	7118.24	7735.42	6333.18	6293.2	6138.31	6002.46	8553.35	6503.4	7044.66	6311.7	6213.37	6418.44	6365.33	6721.19	6967.5	6101.46	6159.22	6132.09	6753.9	5661.12	6249.37	5256.95	5298.9	6628.96	6283.83	7751.15	6317.55	5945.06	6746.08	6403.08	6615.95	5659.5	6303.15	6610.33	6434.89
M309.41529T0.74	309.415	0.737823	-	-	[M+K]+ 270.454	9416.38	14294.2	9920.76	10331.8	9956.23	13223	10952.6	9714.11	9332.21	8401.67	11112	8231.25	9812.69	10104.2	10294.9	9599.45	10187	12658.5	10246.2	9453.99	11519.4	10994.8	11232.4	10928.9	9920.53	9266.39	12237.3	8300.76	9642.28	13927.1	11128.4	9375.31	13978.2	14747.5	13886.8	12832.2	9245.01	10782.7	11019.1	8814.65	12735.6	10500.5	10887.1	11171.1
M309.66082T16.79_1	309.661	16.7879	-	-		24571	22800.6	28049.3	25702.5	24160	22115.4	24958.1	25177.8	25459.8	24729.5	26812	23957.3	19216.3	24250.7	19751.1	21666.3	19993.5	23505.6	19722.1	19679.2	23457.8	22124.7	21537	25112.4	21218.1	22252.7	22666.4	21340.7	22753.8	21172.9	20212.9	18316.5	24423.7	22654	22450.4	20544.5	20614.2	22255.8	21492.5	20709.6	18868.9	22815.3	17681.5	22147.2
M310.15561T15.63	310.156	15.6271	-	-		5357.81	6029.19	5882.41	6677.79	6564.43	5682.61	6770.19	5864.39	6509.26	6735.42	7062.83	5303.36	5867.54	6472.83	7247.42	6360.24	6647.11	6751.54	6014.9	5232.94	7442.79	7499.91	6229.45	6209.51	7660.27	7476.96	8144.47	7636.79	6971.16	8213.19	7135.25	7184.65	6059	7602.19	7186.4	6469.83	6856.52	6133.85	7865.65	6622.01	7067.79	8752.76	7787.68	7075.89
M310.16221T16.79_2	310.162	16.7898	-	-		10193.5	10379.1	9630.52	10533.1	10770.1	8010.78	8183.93	8648	8836.5	9193.7	9086.54	8340.52	8986.73	9806.51	9197.28	7833.11	7369.36	8183.15	8920.48	8475.65	8870.22	10312.6	8729.18	10465.5	9289.91	9455.69	9655.65	9875.36	9166.65	9206.51	8623.63	6635.3	9618.54	8635.68	10454.6	9144.14	11187	8280.9	9202.69	9995.38	8734.66	9196.59	9431.46	8768.54
M310.31047T19.52	310.31	19.5174	-	-		18227.7	16501.1	15563.6	14293.7	23546.3	27362	24194.9	9197.91	19490.2	64198.3	66896	49852.4	22740.6	9484.99	26945.7	496.517	26091.3	23732	33609.8	2865.95	33407.6	2345.36	52093.7	173729	14243.1	13565.8	88057.4	221648	197661	26411	29707.9	76046.8	19933.1	57660.1	16828.9	46318.7	35920.8	25798.4	22011.3	49466	67394.6	7613.24	106799	38778.8
M310.4323T0.74	310.432	0.739918	-	-	[M+K]+ 271.469	17522.4	20837.1	20692.6	18425	17112.3	21209	20723.8	17674.2	20206.1	20061.5	20409.2	20892.4	21471.6	20036.5	20428.9	22110.1	19147.6	20396.2	22746.2	17026.2	21890	22635.3	23183.2	20373	19887.6	20044.1	24291.8	17354.4	20369.4	22520.8	20864	16659.4	22395.6	22147.5	19271	21540.8	20117.9	18254	19516.8	15559	21189.5	19310	18725.9	20516.5
M310.6574T15.63	310.657	15.6311	-	-		3012.56	3539.77	4620.26	3104.87	3043.66	3107.85	3149.64	3909.51	2669.19	3444.6	3143.25	3201.51	2638.62	3366.59	3077.32	2945.08	3405.32	3216.98	2833.84	2365.09	3202.4	3323.07	2327.33	3446.73	3164.72	2480.95	2676.94	2641.91	2990.12	2407.69	2669.31	2541.58	2593.82	2934.68	1922.64	2875.1	3135.16	2377.91	2635.38	2593.59	2239.23	2483.99	2207.31	2316.69
M310.66098T16.8	310.661	16.7963	-	-		3063.06	3846.52	3648.16	3360.76	4018.26	2985.4	4525.22	3170.05	3345.87	2801.04	3729.92	3977.75	2765.2	3406.82	2690.01	3549.55	2843.1	3523.94	3779.19	3314.64	3005.41	3691.55	3719.96	3453.39	4640.94	2974.78	3659.81	3982.74	3609.5	3839.86	3016.24	2809.06	3542.48	3871.11	4273.51	3579.35	3744.17	3625.06	3321.44	4510.96	2651.56	4366.6	3090.1	3255.71
M310.91295T0.84	310.913	0.836018	-	-	[M+K+NaCOOH]+ 203.961	155975	155231	132667	161858	156272	155802	150862	151596	152475	143507	152158	149768	161938	161767	146553	149177	154800	137026	143850	152404	167400	153408	150363	146111	170307	156004	159176	166639	145389	163636	159012	184775	155723	157741	167203	151919	168510	185685	152114	186304	155926	160436	180869	151761
M311.00902T8.83	311.009	8.8302	-	-	[2M+K]+ 136.022 [M+K]+ 272.047 [M+Na]+ 288.02	7565.34	9735.71	11850.5	8868.09	11073.3	9867.69	7818.51	10406.8	9888.72	7740.85	8645.77	7948.51	8702.35	12267.1	10183.4	9638.5	8140.04	8932.05	11708.4	8993.64	9559.38	9981.93	8519.84	4634.68	11502.4	7377.59	9605.91	8979.56	9109.7	7563.78	9753.37	10296.3	7076.21	8116.68	9029.69	9623.37	9083.27	9711.25	10805.3	7278.14	11120.3	8923.11	9179.98	9874.96
M311.12393T6.87	311.124	6.87389	-	-		8304.17	10993.1	7513.43	3876.31	10282.1	11074.9	8629.71	9391.69	8131.91	15245.3	9315.36	10897.9	7400.07	13998.3	14120.3	9525.85	6949.7	6404.38	12000.7	9375.7	9565.65	9512.94	10572.1	8383.88	8081.75	10701.2	16017	7490.39	10661.5	8041.55	8734.77	10199.6	10050.9	7399.77	7150.62	11695.3	13766.2	9641.29	11583.5	8924.69	11226.8	11799.3	10358.3	8012.54
M311.16242T16.79	311.162	16.7871	-	-		174737	163668	176582	163649	162662	143395	145923	159417	177124	163106	181733	173154	139719	173664	151484	159391	149130	167801	150448	158593	160105	163591	158713	163421	158818	164979	169909	172484	181526	166963	164895	164454	185460	179262	190813	175125	186156	192739	190671	165709	168207	197658	184887	166336
M311.16266T16.49	311.163	16.4894	-	-		104447	91811.7	99769	72748.2	102017	70544.4	88566.7	94454.5	97353.1	89606.4	94206.3	86316	72039.1	84291.4	79667	88670.3	67198.2	83919.3	84332.5	81633.9	85531.1	85586.8	73294.5	89293.8	94244.7	92074.5	82405.5	84479.2	86577.4	91213.9	82842.1	74916.8	100887	91651.6	118807	96350.4	108562	100527	101126	82360	77702.6	100689	95668.5	85888.4
M311.29455T17.07	311.295	17.0717	-	-		2918.61	4295.25	3731.24	2018.99	3206.05	4574.02	2614.79	3563.18	3608.54	4609.73	3522.35	2964.5	3329.71	3809.14	4294.32	2982.35	3194.28	2620.85	4421.28	3275.55	3609.45	3912.29	3529.32	1943.62	2966.15	3509.19	4657.04	3375.4	4159.41	3829.9	2878.32	2885.79	2874.55	2994.82	2022.05	3427.37	3787.42	3078.27	2930.03	2072.53	3075.32	3397.97	4366.41	3699.44
M311.31391T19.52	311.314	19.5176	-	-		4602.26	3353.76	2670.07	3110.25	3696.48	6644.67	7673.67	2940.76	4550.24	13417.4	12719.5	10903.4	5022.02	2122.44	5565.23	210.668	4952.99	5199.09	6733.12	833.918	7617.48	788.9	9963	42888.2	2856.15	2819.72	19304.8	49251.4	45308.6	5774.32	6915.19	15245.1	5651.85	10965	3430.38	10802.3	8696.49	6370.56	4745.32	11353	13594	1177.47	21780.3	9457.8
M311.43195T0.74	311.432	0.741876	-	-		5918.17	4573.58	5216.76	5120.23	5980.35	4116.99	6959.85	5593.77	4682.66	4883.57	4823.01	5051.92	4435.51	5861.69	4385.87	4642.6	4932.83	5289.38	4832.47	4576.66	3640.28	4992.35	5208.13	5116.16	5108.36	3863.64	4914.81	4131.3	5928.38	4404.55	4047.13	4729.01	5475.94	4440.57	5043.93	5086	5176.35	5643.25	4994.02	4219.91	4882.91	5476.85	4327.71	4066.54
M311.658T15.99	311.658	15.9905	-	-		7660.84	6730.79	7944.25	5522.6	8894.13	5887.78	6985.46	6702.07	8090.75	8614.9	9120.77	7888.42	6611.64	6748.69	5648.62	7345.27	4149.86	5443.73	7484.42	8162.66	5792.45	8434.25	6195.32	6939.02	8266.66	7554.09	7822.13	6438.84	8181.31	7740.26	7774.07	6641.42	7900.77	6768.6	10174.1	6689.79	7057.15	7938.46	6488.5	6654.91	5972.22	7640.7	7010.27	7139.57
M311.66395T16.79_1	311.664	16.7879	-	-		61279.5	57344.6	59443.7	50314.1	60973.2	52004.6	49904	55711.2	55881	59006.4	56326.1	53124.1	45420	55769.5	48645.7	51078.9	48950.2	56275.8	51804	60726	52423.5	52758.8	54563.8	59234.1	56557.4	56721.1	59159	58214.7	65823.4	56916.4	52960.6	52956.6	60205.4	55675	64628.6	59883.6	63609.3	59626.4	64895.2	53098.5	52796.1	58046.3	60266.2	54117.1
M311.66421T16.49_1	311.664	16.4888	-	-		33710.5	31178.3	30672.9	23335.6	33516.3	26713.9	29261.7	28918	36955.2	33491.6	31781	27286.9	21324.8	31811.5	27697.6	29810	19820.4	34939.1	27304.7	25632.7	28248.6	29749.4	27977.8	31758.6	31519.8	32007.1	31377.2	28960.9	29124.2	29196.5	26377.2	27911.3	32852.2	30682.7	39849.2	32859.9	32930.2	34840.7	31989.2	28647.2	28525.4	34218.9	30853.3	27089.8
M312.13891T15.03	312.139	15.0252	-	-	[M+2H-HCOOH]2+ 668.266	22802.3	27442.4	26087.4	21330	22845.3	21616	20373.4	25874.3	27470.7	22668.2	28846.4	28530	19232.8	26946.5	30011.9	31500.1	29431.2	18521.6	21893.7	16401.2	29195.6	23737.5	18907.2	22610.6	30036	28505.4	34702.6	23112.2	33202.6	31625.2	22919.1	28909.1	35458.3	35207.5	27337.2	31936.8	35209.5	31572.8	46921	25137.1	30876.5	32683.8	24384.8	25954.6
M312.16081T16.79_2	312.161	16.7855	-	-		79941.7	70377.5	76502.4	71748.1	79958.1	64130.5	70567.4	70332.4	76135.1	73257.5	79546.1	82184.9	62013	79802.1	69601.3	71821.8	70315.4	70851.7	73297.6	70193.7	77158.8	66616.5	70399.9	75963.8	70490.2	75801	79614.9	79096.6	76995.8	76140.6	75335	72867.6	79793.1	76493.3	75871.2	74005.7	84255.1	79582.6	82075.5	67372.9	68881.5	75851.2	76948.6	73461.8
M312.16101T16.49_2	312.161	16.4894	-	-		39831.1	41186.6	43014.8	32805.9	42716.4	32217.5	37572.2	37310.7	45307.5	45822.2	46394.6	45107.7	31635.7	44033.2	39758.3	37340.2	31356.7	41791.2	39120.8	36988.3	38680.3	36514.1	36429.8	42634.9	42733.8	45714	38581.5	40546.8	41134	40129.7	36233	34141.7	46993.8	38097.7	53407.2	42071	38482.6	43407.1	41951.6	37784.6	36858.8	46563.8	42217	37683.6
M312.42879T0.74	312.429	0.737912	-	-		2574.46	2899.88	3286.42	3062.25	2444.69	2605.06	2390.74	3231.85	3052.37	2592.57	2940.84	2468.42	2898.73	3127.65	2677.05	3170.16	2227.74	2532.67	2931.33	3772.18	3213.9	2936.05	1906.2	3246.77	2554.31	2795.15	3384.43	1855.83	2238.18	2694.61	1686.9	1606.97	2491.27	2174.35	3140.09	3625.66	3468.28	2826.57	2543.36	1867.34	2626	2730.89	2329.39	2956.04
M312.63385T14.69_1	312.634	14.6924	-	-		23773.3	31566.4	24800	14992.3	16098.6	19595.4	22780.8	23481.5	28468.5	16836	27743.4	29862.2	26665.2	19074.6	24237.3	27530.9	28573.1	32206.4	28873.2	16811.3	27821.8	29032.3	22706.8	19062.2	26055.6	26813	26567.2	20876.7	30120.3	24107	19263.2	28091.7	21451.5	35861	17038.9	31608.3	35343.4	26810.2	29136.3	12820.6	24079.5	23126.3	21605.3	22084.6
M312.64069T15.03	312.641	15.0273	-	-		1948.02	13039.9	11518.3	10925.9	9291.13	9262.69	8454.83	11165.2	11434.9	8989.91	11071.4	12712.4	6528.25	12038.7	10262.3	9778.76	10374.5	7562.75	9833.33	8224.05	13082.1	9399.7	9363.69	7493.53	11109.8	9762.33	10317.3	9673.26	12703.9	9556.45	9670.68	12047.5	11742.2	13685.7	11621.3	13186.8	11633	12877.1	16921.4	9685.93	11488.1	11955.5	9127.04	10459.3
M312.66197T16.79_1	312.662	16.7884	-	-		25185.7	25314.5	25054.3	24756.3	26896.6	23678.4	25032.2	24418.9	26791	24294	27412.7	26211.2	23028.4	26563.1	24117.4	24080.9	26013.2	26714.2	23807.9	23580.7	23678.8	26816.7	24779.5	25090.1	26927.6	25983.9	28781.7	27664.9	28787.5	28278.2	24773.5	26101.8	31149.7	27217.3	26974.5	25048	28691.6	28614.7	32171.5	27840.1	23658.8	29885	27675	26948
M312.66212T16.49	312.662	16.4874	-	-		14446.1	12087.3	15176.9	9768.11	15404.2	10620.9	12993.2	12073.9	13925.7	15328.8	13976	15602.7	10485.9	13950.9	13313.3	11781	11890.7	11303.4	14130.2	12270.6	14383.5	13483.7	13406.9	14001.7	16579.2	15416.5	13235.2	13223	14575.5	14548.9	12351.6	12401	14688.1	13295.1	15296.6	14124.3	13991.5	12770.4	15473	11783	13965.7	14944.1	14235.8	10799.8
M312.91192T0.84	312.912	0.836385	-	-		13541.6	13362	13515.8	13124.2	13726.5	14613.3	14134.1	13568	13709.2	13924.6	13491.4	13964.6	13334.8	15772.1	12972.8	13424.1	12658.4	10738.9	11189	12161.5	11625.1	10344.8	10365.5	10804.5	12697.3	11326.4	11417.5	11444.4	10811.6	13535.1	11978.6	13030.4	12509.7	10842.2	11353.9	12695.6	12195.9	13993.1	10843.2	12766.4	11780.4	11042.9	13378	11668.9
M312.93406T0.74_2	312.934	0.736865	-	-		10928.6	10636.6	13263.8	12441.5	10776.8	10995.4	12912.5	8691.78	11728	9905.79	10307.6	12139.7	11606.2	13346.3	13159.1	10585.8	12736	11196	12497.1	12014.1	13511.1	11627.4	14571	12696.5	11514.9	14115.9	13602.5	11836.1	10592.3	11329	11151.1	8087.55	11688.3	9091.76	9969.97	10972.9	10998.4	9619.46	11737.4	9144.26	12968	13200.7	11904.1	11499.1
M313.13541T14.69_2	313.135	14.6937	-	-		7110.26	11226.6	8273.56	5647.19	6631.01	9232.54	7150.14	9970.29	11994.3	6637.45	8936.6	9760.15	10446.8	9389.77	8546.05	10480.3	10208.9	12618.5	11402.1	5477.38	11400.5	12390.8	8595.13	9012.53	11632.9	10076.3	9293.44	6638.2	9442.01	11187.8	8012.17	11531.2	8811.17	10921.7	7519.87	8928.52	10205.7	7950.4	10421.4	7087.61	7768.03	8108.12	8114.1	7977.04
M313.16024T15.99	313.16	15.9906	-	-		60634.4	66846	67514	43094.6	64534.6	54664.7	53605.3	53285.3	59222	71092.2	66464.2	67426.7	50202.4	57288.2	54205.4	61098.6	36941.6	50402.5	55671.9	49264	49847.2	56202.6	50238.8	53394.4	46190.8	60583.8	66061.5	56114.4	59814.9	62620.7	56387	51343.1	66985.8	61975.5	75554.3	57052.2	62314.1	72160.3	64043.2	60975	53235.6	57066.2	69132.2	58439.2
M313.16045T16.79_2	313.16	16.7858	-	-		17624.5	16147.6	17223	14171.5	16382.1	14216.4	14217.7	14519.5	14722.5	16018.5	16250.3	16421.5	12146.4	13576.3	15863	14504	13199.9	13158.4	14194.3	13204.4	13912	15786.3	13444.6	15276.6	13474.9	14043.5	14625.8	16564.3	14032.9	14082.3	13928.2	12610.4	15720	14827.9	14286.6	14004.9	15727.5	14095.9	13864.9	15208.5	13692.3	15017	14492	15002
M313.43536T0.74_3	313.435	0.741153	-	-		3317.72	3911.95	3694.76	3200.54	3460.37	3701.89	3536.94	3526.32	4536.79	3075.98	2948.36	5945.6	4354.81	5433.88	4010.41	5057	4935.63	3874.12	4881.49	3440.91	6064.07	3899.62	6545.55	4110.77	4459.79	4358.13	4641.52	3675.38	4435.87	4619.29	3328.84	3443.48	4414.41	4363.38	3869.25	3995.02	5154.95	5205.51	4396.05	3533.63	3824.95	3627.1	5212.47	3676.3
M313.63245T14.7	313.632	14.6953	-	-		6703.01	15203.9	12880.7	9640.74	7696.02	10126.9	8348.21	11211.4	15658.1	9914.6	12561.1	15423.5	12668.9	9735.47	13045.2	14135.3	12295.2	15309.9	12003.6	9606.74	17528	14147.6	11173.5	8957.91	11975.8	11871.8	10823.2	13739.5	12394.7	12141.7	7715.7	12752.2	10035.2	16659.3	9696.76	16167.4	15255.6	11215	18971.9	7802.52	9834.85	10243.6	9919.27	10302.6
M313.64166T15.03_1	313.642	15.0289	-	-	[M+2H-CO2]2+ 669.27	96261.7	103141	97952.6	75858.8	92078.4	101153	94322.9	118033	105759	89990.5	105731	119308	88368.8	108103	104046	111300	101911	79936.8	101438	65425.4	114757	102913	84387.8	86208.8	120878	108154	124340	93491.8	123050	115422	82379.8	104174	120400	118657	104645	122638	124621	128601	166021	96715.4	112390	122173	96680	103820
M313.66137T16.79_1	313.661	16.7855	-	-	[M+H-NH3]+ 329.667	4903.67	4410.02	4784.09	4053.19	5575.32	3471.8	4459.84	4228.35	5016.09	5359.55	5092.99	3874.38	3978.33	4390.44	4579.44	4969.19	3421.71	4530.36	3783.53	4081.67	4498.16	4177.11	3850.35	4736.57	5519.02	4428.23	5545.17	4143.21	4167.89	4424.66	5471.51	4555.31	4154.63	4014.79	4551.23	3581.07	4744.94	4593.57	4349.33	5162.63	4888.83	4264.89	4747.2	3759.88
M313.66162T15.74	313.662	15.7413	-	-		8134.52	7474.55	7571.89	5557.92	6570.3	8337.98	6892.46	9030.92	7491.45	9502.82	7840.86	7482.07	5379.02	7813.26	6001.44	6569.04	4754.2	8045.52	6991.33	5121.56	5832.71	6682.71	7690.8	7371.92	5976.73	7946.31	8075.27	6925.85	8654.54	7571.29	7462.78	7903.32	7634.27	8417.26	11758.7	9540.23	8575.4	8604.76	7171.56	9220.74	8526.3	8451.42	10215.6	9119.11
M313.66175T15.99_1	313.662	15.9895	-	-		17658.6	21049.6	20132.6	11591.5	19820.1	16827.9	17015.6	19765.9	19171	19316	22871.9	20818.2	15101.1	18152.2	15717.3	18614.8	10261.8	15952	17060.1	17133.2	16928.2	17459.5	16287.5	16620.3	15383.5	21060	23288.7	19035.2	18764	22049.1	16416.5	16575.2	19675	18810.4	24490.5	16581	24900.2	23018.4	19399.1	19736.5	16417.2	18663.6	16563.8	19136.5
M313.66993T17.22	313.67	17.2184	-	-		3211.49	4517.33	3190.92	3995.8	3404.98	3640.55	2637.53	4117.14	2671.88	2531.1	4307.21	3707.23	2435	3060.67	3500.04	3093.48	4108.38	2448.87	3102.48	2938.97	3146.5	3916.02	3773.51	3352.64	4107.22	3471.77	4763.42	3086.41	2874.62	3291.29	2832.18	3346.07	3670.48	4131.12	1182.79	3152.42	4727.03	3871.87	2840.89	2645.13	3017.37	3894.89	3272.48	3199.79
M313.95128T0.74_1	313.951	0.737912	-	-		18951.1	17500.9	18686.4	17730.7	15735.3	17167.1	19456.1	17405.2	17747.5	19619.9	18134.6	15771.2	16099.3	20205.9	20724.4	18361.8	19437.4	18291.5	18142.4	15953.8	17283.9	17940.7	16323.2	15765.9	20681.9	21992.5	17537.4	15566.4	18814.7	17642.7	15833	16248	16266.6	15873.9	13839	19448.9	18753.3	17219.8	18497.1	13191.4	18269.8	22496.1	19876.5	20779.1
M314.14336T15.03_2	314.143	15.0285	-	-		33509.8	38369.7	34236.7	24967.6	30355.3	36359	35190.6	39372.7	35307.6	29585.6	35361.8	38425.3	26835.3	35509.5	37252	36542.4	36252.3	31268.6	30581.8	22452.7	40683.6	35244.4	32309.3	29417.2	39593.8	37365.5	39325.1	30036.6	37690	37334.5	29404.1	35273.4	47336.1	40315.2	35847.1	39028	38845.5	44577.6	56587.2	31849.7	34014.4	42206.5	32753	37307.4
M314.15857T15.99_2	314.159	15.9895	-	-		26588.2	26914.5	30429	14559.9	26030.7	21378.6	24802.3	24440.2	24794.2	36811	29080.5	25116.8	21899.4	24690.5	22638.3	24610.3	14209.6	21284.3	25915.7	22259.2	21085.4	25625.4	19998.3	23542.8	21981.4	26550.4	28772.9	22304.4	24979.2	26263.7	23465.7	20114.2	25448.1	22379.6	32045.4	23190.6	27596	26579.9	24971.2	23177.1	22915.3	26671.6	25796.1	24463.4
M314.15948T16.79_2	314.159	16.7858	-	-	[M+H-CH3]+ 328.169 [M+H-CH4]+ 329.17	3993.87	3722.44	3784.53	3782.91	3562.94	2841.35	2979.27	3115.08	3256.38	3629.74	2976.86	3417.33	2703.45	3232.03	3223.2	2916.55	2610.26	3557.4	3671.77	3001.78	3188.14	3403.29	3188.49	2880.21	3193.9	3226.34	3300.2	2952.32	3196.44	3017	3278.2	4181.21	3595.51	4045.93	3592.99	3058.75	3892.22	3592.61	4350.57	3228.54	3570.65	3744.9	4522.23	3623.7
M314.19643T12.52	314.196	12.5159	-	-		10393.3	11897.9	9366.55	5722.67	5510.13	10843.3	5700.15	5872.03	7169.92	11728.3	9915.21	11965.7	7610.55	8614.3	8243.96	17667	11960	7722.94	12450.7	7863.81	14202.7	7377.12	6491.38	12524.7	9273.48	11930.3	10199.8	11313.1	7769.62	12029.4	13072.1	13673.9	13843.8	7848.01	8895.73	13396.4	16955.7	10153.6	11512.7	12516.7	6724.66	18427.3	23315	10641.4
M314.45194T0.74_2	314.452	0.741443	-	-		6944.02	7470.47	7904.62	5766.23	5685.42	8757.03	8372.18	6380.26	6556.09	7481.23	8494.31	7120.01	8797.43	8447.42	9855.81	8571.82	9315.32	7360.34	9581.39	7505.78	8048.7	7879.42	8098.62	8322.6	8206.32	9626.96	9937.28	8387.59	11886.5	8577.47	7514.69	8483.55	9011.74	7494.92	7074.47	7250.14	11175.3	8525.7	8592.91	6176.08	10395.5	9981.25	7900.6	8491.61
M314.64009T15.03_1	314.64	15.0292	-	-		39795.6	47519.3	46837.9	35928.3	39053.3	46027.5	38701.5	48940.2	48889	37401.4	38337.8	43165.9	34540.1	44325.7	45429.8	46890	41542.7	32489.6	45087.7	26753.8	44209	39831.5	36263.4	30984.7	46674.2	42337.1	44363.1	39358.7	47316	45288	35929.7	42065.6	55362.3	47047.7	43997	49351.9	52504.7	48678.9	64827.9	35937.4	43273.1	48512.3	36816.4	42632.1
M314.65961T15.99_1	314.66	15.9908	-	-		7809.61	9896.61	9431.9	6230.74	9866.97	11295.5	8939.72	8937.55	12329.9	11271.3	12023.4	9551.13	9007.87	10708.1	9740.44	9696.74	6355.18	9532.63	10327.1	7283.9	8049.55	11095.8	8115.03	8325.97	7093.32	9800.09	9973.42	9486.42	7805.21	9169.06	8971.15	7692.57	9199.68	8957.23	15021.5	8880.88	8793.57	11970.1	8160.45	9369.83	8688.21	10417.8	8705.46	8880.27
M314.95074T0.74	314.951	0.740342	-	-		7917.12	5964.77	7453.06	5263.87	5629.64	6974.82	6358.86	5161.37	6478.04	6461.9	6328.87	5671.52	7059.77	7615.42	7682.11	7890.57	7804.02	6829.12	6050.95	6427.22	6347.63	6719.36	5756.65	6372.35	6834.08	7899.43	7490.86	7176.05	8402.96	5880.29	6963.82	5682.17	7040.68	7102.78	6819.52	10907	8877.76	7326.98	7124.86	5317.98	8942.96	8865.07	7210.31	6929.88
M314.98611T10.21	314.986	10.2144	-	-		4642.29	4946.11	7759.71	1992.01	4749.72	3622.59	5292.99	3232.84	3613.22	4178.81	5769.07	3449.26	2696.17	3338.93	3331.18	3240.05	3177.39	2865.94	3450.07	4095.77	3880.77	2167.98	5170.95	2558.12	3463.89	1871.05	3949.42	6361.27	2792.49	2392.15	2740.72	2394.87	1997.67	4802.95	3024.62	4554.85	4594.32	1930.03	3646.52	2536.95	2812.21	2154.59	2541.63	2062.99
M315.07993T1	315.08	1.00374	-	-	[M+Na]+ 292.091	793949	739163	864852	736581	847878	898097	839614	630555	874635	768496	763543	689246	752722	919388	891330	789375	891892	704676	959278	688743	869322	829910	791132	790330	928184	931011	843329	762215	801709	799726	666709	690342	901339	944905	870805	877646	975780	767448	829811	530421	777650	816381	766258	891176
M315.08005T1.26	315.08	1.26445	-	-		239940	357749	279440	254129	295059	273903	293642	265589	289111	296397	272816	300326	287889	289578	276907	266513	270257	264823	278396	267530	252980	272394	248384	244772	247642	280906	274715	240964	261522	280518	239222	238136	278803	276902	268523	277482	273289	269701	264576	239494	258000	286963	284714	290286
M315.14121T15.03_2	315.141	15.0292	-	-		15934	15064.6	16795.9	14629.4	14687.9	15241.8	15531.5	16687.7	17702.9	15129.5	16212.7	18329	14795.8	19718.2	18073.4	16265.8	17860.9	13433.7	19176.9	11713.8	18466.5	18512.6	13205.6	12885.4	16634.3	18860.7	19217.2	13801.4	19006	19175.4	16280.6	15425.8	17837	18068.4	18111.2	16889.7	16439.8	20497.9	24884.3	13863.4	16787.6	19365.6	14326.7	16313.1
M315.15259T15.76	315.153	15.7584	-	-		6950.11	6011.13	5574.43	5029.76	5692.98	5338.83	5157.74	7118.88	7721.85	5797.31	8073.51	5326.32	3622.41	7186.16	5028.65	6613.99	5467.43	6580.55	5698.5	3632.69	5819.17	7815.07	5747.3	6630.8	6107.04	4928.41	7768.79	7483.31	6095.15	7522.78	5086.5	4728.51	7696.91	6617.98	8064.7	8618.51	8560.24	9510.78	9621.68	4955.51	6023.1	7781.57	5911.08	5726.6
M315.15807T15.99_2	315.158	15.9895	-	-		4110.58	5853.27	5644.83	3562.97	6419.51	4765.47	4833.36	5085.89	5010.97	5820.04	5024.19	4026.67	3380.96	3959.53	4065.38	5043.53	3905.25	3804.54	5176.66	4127.8	4036.5	4332.27	4168.5	4118.46	3904.5	5915.4	5927.21	4555.36	5541.69	5811.86	4346.99	6592.27	6725.83	4823.3	6875.37	4140.03	5726.71	5060.35	5375.68	6797.4	3958.34	5541.12	5758.19	4175.52
M315.63984T15.03	315.64	15.0319	-	-		8443.35	8478.55	8298.65	6092.14	10421.9	8371.25	8025.99	8459.34	9885.63	7765.15	8541.09	9494.46	6938.48	9146.7	10077.9	10645.6	7325.4	6412.45	8108.76	5523.1	9317.61	7202.12	5916.12	6981.62	10245.1	9191.89	10221.2	8038.31	10803	7883.4	6474.25	7062.5	10280.9	9235.58	8309.28	11123.4	10002.2	9590.25	12665.4	6038.78	8327.79	8358.06	6613.55	8038.52
M315.6406T14.03_1	315.641	14.0319	-	-	[M+H+HCOOH]+ 268.631	3068.6	3366.69	2519.34	2767.93	3127.51	3972.64	3159.08	3472.33	3772.11	2480.03	3157.59	3505.32	2398.22	3097.59	3367.13	3766.13	2725.63	2562.14	2512.69	1964.96	4084.42	2840.04	2212.27	2426.73	3573.89	3777.46	4771.15	3324.11	3941.51	4941.36	3499.57	4453.76	3846.26	5985.6	4887.79	6004.46	4665.87	5055.84	4499.43	4515.5	3330.13	3868.24	5116.06	3304.9
M315.64802T15.76	315.648	15.758	-	-		5453.24	6373.26	5916.34	5877.42	6756.59	9789.31	6365.28	8564.58	8025.83	6560.82	9753.16	4773.54	4004.93	7619.25	5616	7770.62	6063.67	5403.44	5338.1	3434.32	5836.51	6313.32	6807.16	5896.62	7928.27	5310.68	6042.91	7918.86	7102.16	6222.26	6509.58	5445.88	10495.9	6651.58	8128.61	10658.7	9127.08	10138.5	12221.7	6177.1	7276.74	6493.94	5535.61	9299.78
M315.65588T15.24_1	315.656	15.2418	-	-	[M+H+NH3]+ 297.631	3564.42	4369.01	4565.7	4140.68	5330.98	4590.72	4609.01	5345.53	4759.81	5345.15	5011.99	4599.16	4206.52	4198.05	4635.29	3646.42	4246.87	3888.49	4670.71	3535.84	4057.7	4470.09	4604.26	3486.07	4508.64	4637.23	4299.88	4499.72	4527.6	4624.22	4487.04	3981.81	4388.95	4396.49	3419.58	4328.3	4532.01	4091.65	4628.13	4638.69	4127.34	4728.48	4855.14	4126.52
M316.08316T1	316.083	1.0032	-	-		91557.8	86375.2	100521	81965.1	98750.1	104259	96138.4	68562.4	114398	93396.6	82163.3	80251	87775.4	102499	108470	95953.3	102783	77596.7	115326	81998.4	108256	101794	95550.3	89039.5	110293	110232	92781.3	87742.2	88677.1	93152.9	76388	75096.5	102946	110875	99302.9	109341	111686	86140.1	93285.7	61878.8	96454.4	95124	88782.9	105017
M316.08326T1.27	316.083	1.2653	-	-		28213.6	46941.6	37783.7	29499.5	34640.8	34286.2	35894	33811.4	32709	35339.1	32111.6	36544.9	32449.6	34751.4	33360.7	32300.6	29802.3	31029.6	30843.4	31315	31893.6	32332.2	28829.8	33627.4	30073.8	29631.8	31124.7	26939.9	29558.3	32924	25830.3	28214.1	35586.3	35578.2	32042.1	32034.3	34453.9	32857.5	33969.1	26060	30817.1	34279.7	35295.7	33252.1
M316.17536T6.15	316.175	6.14637	-	-		4544.99	5145.12	4541.11	4010.98	5075.33	4951.78	4118.68	3852.71	4098.44	3804.97	3619.55	4039.78	3544.77	3083.57	3703.46	3671.21	2770.11	4165.26	3493.01	5619.14	3033.39	4691.14	3688.37	4187.95	2913	3451.02	4053.82	3719.24	4051.41	3104.14	4051.76	3587.28	5545.5	2417.29	3623.39	4889.7	4170.31	4980.53	5597.4	3275.34	3515.34	4164.93	5287.67	3504.93
M316.6484T14.72_1	316.648	14.7184	-	-		3700.84	3239.34	4065.74	3640.94	4370.78	2722.39	4125.4	3171.94	3620.83	4227.61	4963.24	3867.99	3075.53	4334.09	3418.12	3660.83	3203.64	3741.63	2906.72	3533.47	3309.73	2556.72	3060.97	2961.79	3767.76	3826.5	4140.92	3526.37	3092.32	4250.11	3987.07	3306.98	3143.65	4218.09	3823.63	3359.06	3924.54	3959.85	4197.11	3526.8	3580.93	4682.3	4371.61	3538.37
M316.65402T15.24	316.654	15.242	-	-		2183.95	2893.41	2064.34	2411.14	2544.11	2557.99	2511.92	2199.29	2022.5	2648.95	2494.84	2724.14	2414.3	2098.74	1731	1665.17	2125.94	1827.2	1529.88	2216.58	2253.94	2098.65	1365.36	2168.91	2086	2235.79	2434.79	1952.5	2212.14	2241.41	2356.3	2078.06	2534.89	2484.59	2102.91	2173.31	1497.02	2346.03	1768.46	2460.56	1679.52	2360.95	1993.47	2183.37
M317.05614T0.99	317.056	0.987555	-	-		49431.7	88595.9	64696.6	57926.5	82923.1	42857	52105.5	99874.3	44105.4	57109.6	62624.9	81817.7	68821.3	30143.2	29625.5	37571.5	66899	73174.1	43967.3	64473.3	52173.5	38250.3	45624.7	45425.4	48218.2	27770.5	50421.3	61631.4	74487.8	60597.2	78553.4	140320	75949.3	48671.2	75661.8	45554	51156	43221.3	69712.7	88670.7	141654	67325.5	73991.8	57951.4
M317.08467T1	317.085	1.00337	-	-		19072.3	16724.4	16860.7	15505.5	18724.9	18263	15966.6	12343.5	20571.2	16495.2	18085.5	13334.9	16160.5	23428.6	20786.2	17576.8	20042.6	16283.5	21866.2	14553.4	17790	16237.5	17170.9	16478.6	18590.9	20221.1	18810.5	16823.4	16312.8	16536.7	14224	14073.6	18574.4	20914.4	18854.9	20594.1	20501.5	17231	16523.5	10848	17113.9	17546.1	16425.6	18015.9
M317.14776T14.72_2	317.148	14.7184	-	-		2888.48	4041.7	3758.9	3634.71	3693.5	3838.57	4575.75	3283.91	4519.02	3677.48	4356.39	4285.63	3239.09	3535.33	3378.2	3500.8	2989.34	2522.54	2787.39	1774.2	2818.32	3086.88	3135.31	3389.68	3988.43	3516.82	3649.25	4853.02	3986.04	2821.41	4838.75	3649.9	4024.81	3593.55	3484.94	3543.78	4605.72	4657.52	3831.28	3069.12	4009.62	4662.5	3679.2	3504.11
M317.65627T15.62	317.656	15.6192	-	-		3457.76	3206.27	4118.77	4525.39	3198.71	3209.62	2570.69	3493.66	3232.25	4714.59	3947.96	2937.01	2415.07	3860.72	3444.44	3017.26	2755.32	2350.26	3022.97	3307.51	4295.31	3250.7	2615.25	3570.8	3501.66	3093.41	3411.22	3952.64	3434.64	3493.89	3423.17	3543.96	3667.31	4471.49	4655.08	3996.3	4404.71	3979.68	3672.05	5237.32	4171.14	5362.13	4303.75	3421.29
M317.6611T15.24_1	317.661	15.2437	-	-		10112.3	9263.02	8138.22	7920.13	8697.84	8150.56	9854.85	9361.89	9472.98	11172.2	7840.65	10319.2	9392.45	10350.7	9788.98	10944.5	9221.26	7623.31	8867.02	8684.61	8223.95	8685.19	9473.44	9037.23	10020.7	9113.42	9275.31	8976.06	10411.7	10032	8853.65	8864.35	8004.27	8333.56	9325.1	8729.26	8640.26	9595.19	9010.48	8308.84	7828.48	8309.72	8118.52	8197.38
M318.1298T1.18	318.13	1.18291	-	-		8020.28	12891.2	7936.07	8719.93	8999.63	9646.86	13794.2	6534.43	11251.6	8810.61	6750.04	8889.51	6132.86	10393.2	11138.8	6579.8	8383.56	10073	10320.9	12610.9	8795.9	13390.2	4505.93	4614	7817.44	4517.09	7721.39	8476.98	10129.6	13289.8	6147.52	7654.84	8027.07	6030.55	11928.8	11632.4	9839.5	11223.3	9313.53	9946.86	11504.2	10884.8	9551.14	13397.5
M318.1626T15.24_2	318.163	15.2418	-	-		3046.72	4889.71	4126	4911.57	2162.25	2862.67	3664.47	2933.86	3078.55	3833.9	3256.44	3417.56	2919.73	3896.69	3654.48	3377.92	3372.56	2150.39	3746.65	2731.17	3105.27	4186.56	4428.22	4655.73	4990.35	3822.12	3674.99	2905.92	3680.34	3499.23	3649.43	2931.07	3781.24	3216.69	3515.7	4539.81	3089.32	3481.4	3575.39	3694.07	2712.28	2030.79	3316.45	2116.68
M318.19623T9.04	318.196	9.03939	-	-		45143.7	45548	45050.7	202028	45354.4	177175	45678	46579.2	45764.1	-1361.56	44496.4	-12392.1	45090.5	46411	46506.5	45101.5	20375.9	-22888	46077.8	44862.5	44589	45667.1	45592.4	46648.9	26270.1	45572.5	-24136.7	45504.8	45866.7	45049.7	45595.8	44974	46149.1	45837.4	26311	45314.6	18599.4	45436.1	46146.5	46596.6	45979.8	45675	45081.5	47731.4
M318.42114T0.74	318.421	0.741782	-	-	[3M+H+K]2+ 198.957	15437.9	17867	19402.7	16973.4	16310	18953.8	18389.5	13220.5	15893.6	14565.3	16756.1	14481.4	17731.2	15409.8	17066.1	16013.1	13931	18815.5	18094.5	16001.6	16742.8	16264.8	17857.4	16657.8	13591.8	14302.7	20153.6	15942.9	12717.9	17435.9	16154.1	14289.5	19664.8	19148.8	18250.9	15021.9	16028.9	15064	16845.8	13168.5	17278.1	14549.3	15073.4	15324.3
M318.65951T15.24	318.66	15.2439	-	-		2741.39	2236.66	3459.86	2613.84	3305.73	2861.36	3400.81	3257.1	3234.76	3608.25	4743.08	3597.02	3954.61	3730.98	3499.16	3612.17	3503.8	3180.59	4168.16	3255.43	3413.87	2848.59	2978.85	3751.17	3252.37	3031.58	3678.95	3017.7	2976.22	2744.56	2879.3	2606.38	2764.97	3339	3263.69	3348.95	3291.73	3172.56	3147.16	3410.01	3612.36	3112.37	3397.39	3333.84
M318.66754T16.79_1	318.668	16.7886	-	-		18715.6	18672.5	22169.6	16642.6	19198.5	17777.2	16621.6	18384.7	19748.2	19808.1	19656.3	17438.4	14905.6	20704.2	16875.2	18664.3	16001.6	18803.7	17579.1	16990.8	15950.7	16947	17888.2	19611.3	18451.8	20620.3	21021.8	18311.1	17000.6	19170.1	16705.5	15161.4	15785.2	16743.7	18792.4	19877.9	18152.4	17947.3	17411.8	19966	16419.1	15612.9	18607.3	16381.4
M318.96994T0.92	318.97	0.922308	-	-	[M+Na]+ 295.981	27508.8	22832.2	29386.2	23019.3	21984.4	26249.3	23871	24611.4	32142.6	24334.8	24009.2	24218.8	20266.9	29174.9	29613	25340.1	27627	28636.6	28977.6	24648.8	25446.5	24609.8	27995.4	29049	29636.1	31690.6	27115.2	25481.6	28251	27893.3	26232	19701.4	27023.7	35477.9	29053.5	31387.6	31078.5	28149.3	28875.6	20089.2	29209.5	26581.6	25190.1	34321.2
M319.16879T16.79_2	319.169	16.791	-	-		7915.3	8371.54	9064.24	6619.31	7935.24	7088.52	7177.1	8953.98	6439.85	8959.75	7229.06	7716.81	6815.35	6404.11	7183.06	7392.89	7066.61	7856.76	7904.13	6658.96	7709.7	7308.57	8256.73	6504.13	9550.31	8172.66	7806.21	9237.25	7530.33	7599.83	7488.19	7026.47	8331.06	8216.29	10391.4	10303.1	7347.3	7940.5	10750.5	8030.42	9014.39	7595.33	7305.5	7948.75
M319.4377T0.74	319.438	0.741732	-	-		7222.35	8301.53	8010	7800.49	9335.09	8465.68	7708.57	11166.4	9023.02	10957.6	8650.69	7725.18	9244.62	8852.16	9143.41	8272.52	8311.93	8949.99	9965.81	6722	8201.68	8767.35	6759.32	6925.94	7069.03	8068.04	9349.36	8451.59	9063.3	8698.96	6337.95	7372.41	8136.34	9080.54	7834.48	8166.28	8919.51	8914.77	10213.9	8652.2	9205.02	10841.3	8380.1	9398.41
M319.65829T15.62	319.658	15.6212	-	-		5779.72	4567.08	4860.78	5641.7	5179.2	4899.35	4383.82	5177.54	5358.59	6684.52	5026.32	4257.17	2828.53	4353.35	3946.7	3470.52	3976.47	4462.76	4955.75	4459.78	4317.13	4021.44	4235.79	5893.39	5857.23	4501.3	4725.69	4991.8	5579.7	5545.12	4990.12	4642.82	6838.62	7851.37	4677.44	6739.68	5168.41	6344.93	5621.99	5557.07	4958.52	4862.34	5672.04	5600.81
M320.00924T8.39	320.009	8.38704	-	-	[M+Na]+ 297.021	19265.3	17261.1	18593.8	17287	15407.5	18370.7	16921.1	19508.8	16688.7	17329.8	19626.4	18146.4	18988.9	16551.7	18211.7	17160.3	18162.8	17676.6	18126.5	19223.9	17433.3	16397.1	15172	16532.6	16714.3	18544.2	18297.7	18394.5	17880	18787.6	17744.8	16812.7	16343	19687.3	17936.4	18643	17467.4	17923.3	16749.3	18615.4	18397.6	20223.1	17631	19464.4
M320.16793T16.49	320.168	16.4894	-	-		27185.1	26636.7	27867.7	20529.7	32943.5	27830.8	30454.3	29322.7	31524.1	35946.8	27898.4	25658	23571	28518.8	26665.1	27846.2	21397.5	22259.3	28176.1	23533.4	26493.9	27731.9	24436.7	27386.2	27010.8	28149	24914.1	26532.2	26412	28116	25721.1	20763.6	26718.2	27640	37506.9	29416.5	29064.2	31812.3	32637.7	26676.9	28023.7	32911.9	28187.7	26767.8
M320.168T16.79	320.168	16.7876	-	-		309791	314183	324137	301375	326667	310236	313041	322293	330685	333796	331979	304463	275524	311135	279999	302578	271930	303973	281913	272926	293798	289971	289323	288102	295924	296459	297552	303287	311343	309720	291587	283645	323461	300404	340798	328243	306852	321604	327105	302965	317396	334670	316134	307450
M320.43713T0.74_2	320.437	0.739609	-	-		2265.98	1968.6	2583.45	2075.18	1784.59	2489.42	2366.58	2194.68	2324.05	2813.87	1960.02	1486.45	2605.41	2225.82	2062.82	1872.14	1640.64	2616.77	2740.84	1693.21	2348.89	2249.21	1848.21	2571.95	2214.71	2144.92	2869.43	1856.01	2256.02	3023.32	2255.43	1714.22	2449.02	2625.09	2668	1795.53	1786.22	2201.54	2233.7	1721.46	2220.04	2047.22	2718.52	2376.97
M320.6568T15.62	320.657	15.6244	-	-		2437.23	2522.03	3061.63	3176.52	3187.71	2315.96	2003.77	2596.11	3264.82	2675.06	2047.85	2605.79	1779.94	2162.16	2459.57	2238.97	1927.37	2212.46	2655.41	2578.89	1790.84	3254.97	1479.08	2389.77	3247.99	3322.6	3335.78	2804.47	2942.87	2901.38	2393.75	2652.85	2518.95	2934.05	2649.83	3197.36	2602.38	2152.66	3226.53	2275.73	2376.14	3234.18	2938.02	3232.97
M320.66969T16.79_1	320.67	16.789	-	-		123794	112970	119882	100307	121286	104120	118060	119014	124938	127786	116345	116821	108670	113482	103328	104175	100901	104862	110469	97012.1	106327	105181	106255	102867	109659	115405	109345	106687	116191	114341	97931.4	97158.4	115079	113254	123088	111822	111326	115151	113885	107508	108992	119045	109896	106431
M320.92323T0.74	320.923	0.735796	-	-		8553.37	11423.6	9360.14	9436.55	11428.4	10851	9612.17	7990.6	9981.25	8513.04	9087.82	8747.86	9374.57	12290.5	10176.1	10653.5	12317.8	10250.9	13225.8	10135.1	12869.6	10179.5	12602.4	10858.9	8962.39	8136.46	11197.2	9806.84	9431.76	10364.8	10812.8	7460.78	10386.6	12148.1	13258.6	8758.01	7176.49	9382.33	9261.93	7196.55	10213.2	11417	8419.62	8788.61
M320.96708T0.92	320.967	0.922308	-	-		20460.7	16355.6	20496.4	16682.5	17667.4	18704.4	16532.3	13655.7	22362.1	15705.5	15464	15863.2	16042	19086.6	19911.7	17796.6	19876.3	18149.1	19765.4	15149.4	16386.4	17311.1	16963.9	17329.6	18583.5	21349.3	19021.7	15134	19233	17848.2	15246	14540	22263.9	22649.9	16206.4	21576.1	18351.8	14286.1	19014	12083.2	17250.4	17290.8	15477.7	19704.5
M320.9939T8.39	320.994	8.39421	-	-		1899.43	1973.06	1934.86	1790.54	2161.94	2021.2	1939.85	1917.25	4058.79	3978.82	4058.33	4258.94	3775.36	4615.78	2103.78	2556.54	4230.86	4317.29	3729.95	3937.45	1953.27	4895.27	4425.18	4734.58	5606.4	2899.95	2700.42	2717.82	4316.87	4500.91	2600.18	3015.02	4826.9	2460.99	2776.06	4579.5	3251.3	3041.25	3887.8	3919.59	4237.41	2492.51	2093.73	2334.05
M321.01194T8.39	321.012	8.38552	-	-	[M+K]+ 282.05	3031.01	3311.2	3293.23	2920.51	3070.57	3394.44	2943.43	3101.39	3668.59	3546.84	3355.38	3491.64	2827.63	3416.91	3266.78	3362.76	3242.87	3280.2	2784.87	2731.77	2931.19	3375.44	2993.57	3153.54	3958.99	3319.13	3714.6	3457.67	3035.24	3004.53	2840.36	4459.21	3447.22	3475.61	3067.92	3485.67	2735.69	3068.08	3376.97	3500.57	3941.49	3739.47	3356.34	3566.88
M321.16637T16.79_2	321.166	16.7895	-	-		146647	152254	152950	132825	152618	139632	146004	148488	164144	156668	153429	149991	133967	155268	132169	135459	124060	136969	140536	130210	136087	138483	137257	138186	143160	146488	141872	142769	147213	138199	137508	138827	153238	145472	158771	149202	156247	155574	149643	142089	139575	157711	151646	146440
M321.66745T16.79_1	321.667	16.7895	-	-		50360.2	51175.6	53735.4	47118.6	54685	51389.1	53088.5	56311.6	56208.2	52533.5	54600.5	52673.7	46906.8	49294.9	51889.4	51571.8	46161.7	50638.1	49539.9	46887	46817.2	43882.2	46413	46223.9	45396.2	50905.2	50220.3	48847.2	52993.7	52890.3	47373.3	42650.2	51025	49839.7	53362.9	49535.3	50220	47548.4	50229.9	47050	46905.1	53683.7	47731.9	50128.6
M321.94015T0.74_1	321.94	0.73815	-	-		26799	31361.8	29904.5	27917.7	30221.8	33888.2	30441.2	27081.1	35057.9	30242.3	30167.8	27883.4	30445.1	31408.6	31201.8	32630.4	33695.2	32053.4	32221.1	33191.5	31951	33296.6	33630.9	31156.1	26087.9	29649.8	31655.7	26238.2	28067.9	29537.1	28253.4	23755.6	28765.2	32232.9	30832.4	31898.8	27531.8	29406.2	29466.6	23472.6	31973.1	31779.3	32175.9	36147.3
M322.16607T16.79_2	322.166	16.791	-	-		27279	26147.4	26084.6	24027.8	26514	26903.6	27190	27171.1	28148	28672.1	28485.2	25533.8	22903.5	25703.6	26194.1	22605.2	22115.5	22585.1	24080.8	22401.4	26172	25352.1	25406.2	25042.1	26916.2	27059	23293.2	26782.4	23996	27406.3	23473.4	23406.9	28022.1	27634.6	28538.8	29882.2	29488	26819.4	27859.9	27941.7	24630.1	29515.3	29427.4	24804.6
M322.44097T0.74_2	322.441	0.741443	-	-		9635.44	9305.88	10119.6	10422.8	9844.32	8565.02	9258.62	8284.14	10033.7	8686.53	10671.7	9628.27	8886.23	11001.7	9964.44	10256.3	10517.2	10504.2	12904.1	10098.2	10952.1	9936.3	11670.2	10319.3	7856.63	10322	10136.5	8867.54	8346.09	9376.11	8762.94	7815.52	10866.6	10349	11138.6	10770	9380.79	8312.85	9301.5	7083.58	7676.41	9059.35	7566.03	8344.91
M322.66683T16.79	322.667	16.79	-	-		8466.99	8003.47	7393.46	6768.26	7807.88	7459.23	8525.97	8259.59	7167.65	7866.36	7362.33	7907.38	9191.8	9005.3	8180.41	7706.92	7964.94	7403.34	7524.61	6676.15	6832.83	6542.26	6241.86	5689.23	7165.04	7839.52	8133.89	7189.17	8893.87	8153.47	7930.69	6385.36	6413.36	7939.56	8078.9	8021.34	7407.82	7316.81	7728.46	6594.14	7207.54	8035.7	6905.29	7793.34
M322.67568T17.22	322.676	17.2228	-	-	[M+H]+ 321.669	4887.54	7362.4	3993.98	5547.38	4204.48	7131.94	4390.03	4953.17	4364.63	4674.45	5059.97	6035.49	4028.47	4328.33	4684.72	4208.42	4356.53	909.679	3781.05	4025.28	3394.46	4130.29	3707.42	3998.66	4707.12	5454.94	5222.99	4888.82	4395.34	5276.67	2760.08	4975.8	4597.41	5206.54	4209.09	4559.04	6668.4	4226.42	3639.98	4427.63	3621.84	5154.52	4493.27	5488.18
M322.9398T0.74_1	322.94	0.740342	-	-		6887.66	7863.83	8953.03	8732.26	7350.57	8023.51	6801.54	7376.4	6963.05	7330.12	7421.3	9027.06	6837.15	6813.35	7622.43	8936.09	7736.36	6737.34	8632.43	7694.6	7074.51	7006.49	7578.52	6681.04	6570.55	6776.36	7984.26	6908.2	6897.39	8305.55	7330.45	6157.3	9619.59	7399.37	6913.2	7409.65	6991.26	7012.56	9423.06	5941.53	7422.64	8776.8	6473.71	6543.75
M322.96443T0.93_1	322.964	0.925592	-	-		4151.71	3393.48	44269	5627.74	-648.908	5602.59	2254.57	48843.4	39633	5773.28	3175.18	6790.24	32849.7	2612.12	45223.9	3394.6	5665.47	55840.6	3388.09	2749.57	3799.55	3061.31	-747.729	293.488	5636.72	2918.47	5553.18	1976.07	3417.74	-88.3215	41944.6	-1397.25	2584.27	3287.7	5554.97	-553.68	5370.81	16.7884	3720.49	3189.55	41551.3	-496.184	3136.77	-350.647
M323.01087T0.93_2	323.011	0.927283	-	-	[M+Na]+ 300.02	50669.1	51982.6	50646.7	43207.8	58518.2	40340.8	47004.7	52886.2	46944.5	55784.4	45452.9	46957.4	40425.9	50303.7	54537.9	45774.3	59128.9	56482.2	50478.7	52302.8	53874.2	60053.1	51774.6	59088.6	50166.1	55105.1	50834.8	54853.7	62087.9	46152.7	50215.7	46999.6	55305.5	50086.5	49336.2	51033.7	58823	56457.5	57384.2	41937.5	47420.4	56802.7	51358.8	50016.9
M323.165T16.79	323.165	16.7937	-	-	[M+K]+ 284.203	7302.94	6444.57	6592.18	5537.76	7006.13	5753.98	7252.59	5679.08	6905.84	7124.55	6601.83	6963.69	6277.93	6624.35	6251.63	6796.54	5404.61	6493.47	5762.51	6130.05	6126.92	6626.55	5889.35	6787.97	7713.86	6604.47	8485.66	8237.03	9909.55	8320.95	8050.87	5989.07	7446.26	7628.59	8291.28	7425.94	9035.8	7230.59	5999.65	7106.79	6611.87	7891.9	6905.04	6878.78
M323.25797T18.31	323.258	18.3052	-	-		6528	3268.8	2777.34	2338.16	4344	5554.11	3245.78	2574.61	6091.16	3894.71	3104.05	2342.78	3756.16	2545.37	3079.11	2987.72	2222.45	1640.12	3639.6	3102.98	2992.87	3032.94	3694.01	2504.3	8220.12	4919.15	4988.26	4310.22	3789.82	3828.71	3685.52	3367.96	2298.64	8170.75	2262.38	3662.67	3130.19	4165.06	2714.38	2855.3	2067	4098.25	4845.69	4823.29
M323.66613T16.8	323.666	16.7957	-	-	[M+K]+ 284.698	1514.28	2536.11	2093.6	1875.2	1945.67	2199.24	2521.62	1715.59	2448.89	2090.34	2086.72	1805.09	1901.2	2448.7	1414.1	2112.52	2352.41	2305.75	1579.35	1722.49	3267.59	2295.64	2402.82	2900.04	2018.46	2841.67	2708.44	2391.7	1820.41	2618.48	2233.4	2003.42	2482.59	2179.08	2105.52	1912.11	1967.93	2550.03	2923.62	1819.85	2113.66	2142.56	1861.62	2802.87
M323.67632T17.22	323.676	17.2183	-	-		3766.82	4686.71	3836	4608.23	3683.63	3916.26	3092.43	3620.38	3748.91	3937.85	3942.72	4500.48	2818.68	3907.88	4173.63	3772.42	4588.77	1122.01	3463.51	2959.13	2923.64	4178.02	2764.01	3442.13	3652.69	3470.68	4125.73	4008	4345.36	3494.5	2471.87	2882.5	3354.13	3091.95	1244.95	3129.66	5797.19	3691.19	2534.49	2622.11	2870.7	4014.69	3263.22	3658.31
M324.01436T0.93	324.014	0.927111	-	-		3520.65	4318.48	3503.04	3505.91	4526.01	3766.4	4879.81	4037.07	3903.95	3735.14	4188.16	3581.88	3237.72	4549.01	4434.45	3595.26	4185.73	3921.17	3775.2	3774.93	4109.94	4112.95	3674.95	4390.8	3459.06	4029.56	3862.3	3945.06	5491.62	3925.33	3156.41	3268.63	4021.34	4056.47	4840.59	3940.29	4717.96	4852.16	4026.71	3780.66	3372.2	3612.32	3658.58	4666.55
M324.04041T9.06	324.04	9.06289	-	-		6120.84	10161.4	13433	6806.17	10973.5	7653.17	8836.38	8729.36	5592.35	8190.25	8959.89	8142.06	1855.45	11083.5	7991.9	6196.36	7495.06	12754.6	8629.92	7202.65	9003.4	5605.99	2806.4	-86.8591	7881.97	10543.5	7199.16	10022.7	8055.69	9796.02	9589.56	11547.8	9477.72	6577.55	10035.1	15693.3	9081.78	8911.4	10101.4	12054.9	9395.8	10041.4	7074.72	7782.87
M324.66864T15.99	324.669	15.9941	-	-	[M+H-C4H8]+ 379.717	3073.73	2943.2	3693.34	2803.42	3082.43	2339.89	2807.38	3559.1	3578.65	4297.18	3276.68	3510.73	2809.06	2432.58	3903.29	3995.27	1742.34	4063.66	4395.62	3213.85	3551.31	4026.88	3816.74	3953.46	2840.22	3034.96	3981.67	3786.47	4044.31	3653.21	3201.67	2130.65	3289.36	2649.79	4994.01	3070.62	3452.42	3533.55	2946.18	2966.95	3478.98	2942.99	2994.83	2680.09
M324.99417T9.12	324.994	9.12182	-	-		13537	9562.56	9012.17	11325.5	11451	10404.2	10950.2	9419.78	10142.6	8308.44	10812.4	10149.1	10796.6	11285.7	11635.2	10432.4	11570.4	11455.8	10266.5	12104.6	10933.8	10161.6	11682.4	11822.6	12168.3	10381.3	11539.5	12292.3	9881.41	9216.83	11289.2	9713.55	8663.67	10044.3	9740.75	10414	9180.53	9296.52	10344.1	10635.2	9500.65	9181.53	8454.12	9468.11
M325.11309T0.93	325.113	0.925592	-	-		73424.5	84612.5	77282.1	65540.6	79204.2	66849	74424.9	77356	85991.6	76599.8	67194.3	81246.7	59509.9	45471.6	66801.1	64321.2	69565.7	73581.8	63701.9	75374.7	60386.9	73177.3	71549.2	68786.5	57796.2	66392.2	76128.1	51208.7	70903	73084.4	67526.2	58941.1	83924.7	94155.7	56303.2	66916.7	68257.3	81908.1	81646.1	60648	65396.9	76840.8	76086.9	66466.8
M325.15609T12.92	325.156	12.9152	-	-		4422.06	3893.42	2839.92	2255.95	3511.49	4048.95	3506.77	3484.6	2554.16	4096.53	3313.97	4497.08	4433.8	3030.41	3687.52	5890.86	5677.45	5628.24	3931.94	4615.59	7135.99	6603.01	5887.31	5301.61	5908.99	3563.33	3348.45	4357.3	5371.05	4660.07	4436.04	4049.76	4653.03	4523.74	4455.52	2904.01	3820	4575.91	4468.88	2837.15	3505.93	4709.11	3983.93	5158.01
M325.17809T17.22	325.178	17.216	-	-		37193	54456.7	37512.7	38889.7	35845.9	48837.2	35385.1	37870.7	33875.4	27400.5	45830.6	43704.9	30577.8	41571.5	43984.3	38959.5	47497.4	13098.4	37438.5	31895.7	30327.5	37565	33645.9	37026.9	43756.8	38528.6	56371.8	38349.2	36189.4	40196.2	36042.7	38006.6	39181.1	41811.2	16621.1	36255.8	65449.1	38600	32473.8	32116.6	34936.5	39945.6	36922.8	41379.2
M325.24894T11.07	325.249	11.0702	-	-		1549.77	19468.4	32553.3	8914.71	38646.1	32000.6	37274.2	60569	75230.5	7441.85	65216.1	26307.4	28115.4	7098.18	27552	47969.9	25862.8	20402	26136.4	9664.71	28658	6888.23	65225.2	-3404.95	123252	24661.1	67994.2	75859	57790.7	29361.2	26187.8	-7352.22	35895.6	15557.2	8682.27	109256	47339.9	46194.7	21085.8	1753.29	37124.3	20337.6	61747.3	33824.8
M325.27383T15.4	325.274	15.4045	-	-		4147.7	3170.08	3209.97	1265.09	3780.69	3227.64	4025.14	3554.33	2677.48	5187.22	3637.87	3086.88	2899.58	4055.77	3383.48	3687.48	5716.84	3022.12	3794.29	3447.47	5057.5	4707.73	4487.6	3055.93	7403.32	2706.21	6314.38	5763.09	5641.37	4934.38	4135.38	6277.76	4363.15	4807.32	1787.45	3473.62	2956.59	3519.25	3422.77	4899.83	3508.21	4202.14	3275.34	4676.86
M325.27412T14.16	325.274	14.1636	-	-		5638.06	4441.83	3855.23	1784.41	5347.02	3510.89	3014.68	5364.04	3603.46	4643.58	4904.83	4138.97	1430.04	1877.2	2591.11	2322.04	3504.72	5263.55	2819.97	3089.6	2815.37	2765.64	3841.82	1740.7	1384.22	4519.73	2880.53	4653.28	2237.31	3301.34	2885.85	1747.87	3772.05	2733.75	3531.77	5791.48	3775.87	3102.14	2804.59	3147.62	2727.02	3517.9	2977.58	3549.94
M325.67951T17.22_1	325.68	17.2162	-	-		14165.4	20335.2	12642.8	14819.1	12045.6	15513.8	12096.6	13615.1	11907.5	10121.8	15728.2	16561.5	11080	13183.1	14582.7	13152.2	16178	5354.21	11672.1	11144.3	10020.2	14673.8	13584.6	12403.4	12965.5	14928.9	15569.2	14226.6	13403.8	14714.7	12445.1	14780.9	13897.5	15084.7	8315.09	12611.4	25929.8	14792.8	12788.4	11619.9	12915.3	14917.7	15174.9	15936.4
M326.05609T9.19	326.056	9.18904	-	-	[M+Na+HCOOH]+ 257.067	31881.7	29082.7	31198.2	13688.9	31422.8	26641.6	30585.9	30561.4	26199	33539	24983.2	29405.9	27662.2	34976.3	29437.3	15852.9	30544	38224.4	25933.6	29730.5	27997.6	15433.4	28240	2647.93	11476.8	33052.1	24319.3	32986.8	32228.7	32663	29647.2	31564.6	31345.3	21614.2	43138.4	29065.8	33488	28958.6	31554	27981.3	34411.8	32393.5	26664	31960.7
M326.15401T12.92	326.154	12.9173	-	-		1691.77	2452.44	1656.6	1431.52	2377.45	1679.83	1323.83	2234.87	1500.65	3479.97	2711.42	2191.07	2253.9	1657.61	2461.28	3390.01	2752.37	2270.62	2252.77	2440.68	3041.28	2819.88	2779.03	2730.88	3001.35	2584.35	1795.03	2667.02	2414.74	3047.14	2716.05	2595.88	2452.87	1931.04	2599.41	1371.06	2015.31	2164.24	2569.64	1850.04	2138.49	2013.49	1799.9	1989.61
M326.17647T17.22_2	326.176	17.2181	-	-		16451.5	24305.9	16700.7	17522.2	15518.3	18722.6	16181.5	17396.3	14131.7	12133.5	21324	18068.4	13473.2	17749.3	18417.7	15270.6	16742.5	5096.03	13628.2	13779.7	13347	16490.5	14346.5	15860	18267.8	17779.4	22845	16337.8	17510.2	18235.1	14949.7	16419.9	15154.5	18606.3	10384.3	15325.8	35019	16926.9	16511.1	14360	15416.1	19199.7	16544.6	16282.9
M326.25212T11.07	326.252	11.0704	-	-		1552.75	4509.82	7472.13	2611.24	6698.96	6393.8	6796.14	11615.7	15491.2	1980.1	12601.4	5244.72	6945.65	2387.78	6035.78	10389.7	5938.87	3771	5418.62	2863	5590.55	2146.43	12530.9	-1215.38	25326.9	6197.04	14293.2	14583.4	13628.8	6610.32	5317.16	-1105.38	6909.34	4306.83	2129.61	23559.3	10040.7	9080.42	4328.27	759.29	7848.04	4421.09	12874.7	7884.35
M326.3055T17.7	326.305	17.7002	-	-		21275.7	17522.3	13393.6	23539.8	14361	15257	23044.6	26117.3	18059.5	20227.8	23429	15008.6	18528.4	19166.7	27058	16910.5	18917.3	16150.6	19839.2	17100	15254.8	23295.6	14917.8	6020.76	26498.6	9806.35	24498.9	13161.9	15012.3	15785.1	18925.3	22563.7	23307	17135.8	16054.7	18946.8	18002	31187	29531.6	12854.8	15582.1	21233	21589.8	22222.4
M326.6776T17.22	326.678	17.2175	-	-		6627.66	9186.94	5826.45	6755.24	6152.01	8703.78	5751.27	7015.66	5611.3	5597.63	8365.91	8417.2	4943.1	6616.39	6873.41	5965.15	7042.45	3456.84	5455.8	5415.96	5832.09	7242.1	5668.86	6056.92	5675	6656.98	9595.21	6225.68	6881.27	7281.44	5741.73	6264.88	6160.72	6806.54	3086.99	6307.71	11535	6988.48	5925.85	5371.01	5717.1	6848.78	6098.32	6459.8
M326.9943T9.12	326.994	9.12234	-	-		7644.62	6693.12	6915.93	6453.21	7733.55	9060.57	6955.27	6668.76	6282.23	6251.99	7384.27	6209.35	8141.73	7355.98	7655.12	7829.47	8106.4	7550.7	7949.48	9170.44	7331.56	6410.67	8333.75	7450.79	8403.14	7624.43	7057.61	8256.61	6981.64	7464.17	7575.1	7242.64	7200.22	6693.48	7161.58	5545.99	6505.24	7296.45	7064.65	7673.6	7186.77	7047.37	6227.05	6751.67
M327.05895T9.19	327.059	9.18966	-	-		4157.79	4013.53	6625.17	2985.93	4915.05	3920.85	4660.14	5778.24	4090.74	4689.11	5433.96	4484.16	4405.51	5826.15	5078	4124.81	4814.53	6318.45	5403.23	4607.06	4107.55	3330.01	4509.58	638.728	2362.21	4417.34	3698.71	4825.21	4491.26	5007	3897.55	3979.67	4496.56	2746.64	6736.89	5182.84	4947.36	4466.17	4904.59	4543.57	4987.84	4702.97	4462.38	4751.68
M327.28966T15.12	327.29	15.1177	-	-		3635.39	4597.28	3738.17	1917.17	5377.68	5362.45	2990.55	5776.88	5522.16	4109.36	5156.3	4165.76	3290.14	5409.84	3790.98	4731.54	3320.63	8514.84	5955.44	4251.72	7105.4	5595.71	7020.05	3304.82	12154.3	4452.73	6512.47	5419.54	7238.79	7157.16	4692.91	3633.97	7628.59	8752.31	4162.61	8309.86	4815.01	5002.34	5071.67	4502.09	3803.12	7427.42	6921.2	7681.14
M327.42666T0.74	327.427	0.742216	-	-		8104.17	12210.5	11100.4	10112	9662.6	10638.1	10309	9991.85	9565.8	10024.5	9870.16	10471.1	12277.7	9742.61	10330.6	8974.71	8034.26	10205.1	13700.1	11656.8	12804.9	9332.03	12974.8	9694.09	9674.45	9073.18	12404.1	9561.66	10388.5	10908	10598.1	8804.76	13486.3	12396.5	14564.7	11006.4	10818.8	9659.32	9437.43	9759.05	11563.8	9121.29	10435.1	10983.5
M328.13242T15.03	328.132	15.0287	-	-	[M+2H-CH2]2+ 668.266 [M+2H-CH3]2+ 669.27	1946.2	2624.41	2941.35	2417.77	2167.35	1284.76	1564.16	1762.1	2132.83	1707.9	2258.39	2074.88	1401.59	1976.77	1690.05	2247.7	2101.53	1778.31	2256.72	1564.32	3143.37	3044.6	1826.72	3012.19	3273.1	3861.74	3830.9	2525.94	3345.97	3421.79	2043.56	3228.3	3777.2	3310.8	4050.31	3429.69	3972.11	3277.38	4344.77	2945.64	3508.52	3475.77	2822.89	2094.57
M328.13922T6.4	328.139	6.40428	-	-		4975.54	5871.47	3274.97	2709.89	3651.7	2992.72	3585.84	3604	3655.25	4196.96	3507.82	2882.73	2732.72	3677.38	4601.67	3479.68	3792.78	3254.52	3032.14	2911.14	3222.78	3015.43	3192.38	4594.35	4421.38	4047.48	5275.43	2044.64	3633.12	3799.37	3923.73	4128.81	4984.9	4937.66	4291.46	4066.24	3161.55	3783.17	4698.69	3600.62	6871.57	5942.97	3317.44	2708.82
M328.5837T14.03	328.584	14.0285	-	-	[M+K]+ 289.618	4567.74	2488.16	1873.33	2385.28	2641.1	4148.42	1797.88	2913.84	3343.22	2814.78	2573.02	3904.78	3448.79	3053.45	3705.07	4868.05	2957.58	3159.57	4491.55	4731.83	3575.86	3743.68	4188.15	4991.31	3815	4006.61	3695.47	3423.36	2781.96	4497.35	3187.63	1989.91	2951.58	2860.89	3360.56	2443.07	3293.15	3334.53	2600.91	2803.16	1449.08	2701.96	2812.62	2798.27
M328.89781T0.74	328.898	0.741153	-	-		20669.9	17904.4	7458.47	16023.3	19825.4	22136.9	20836.5	15084.6	19371.3	19896.3	17430.7	21337.6	20653.7	18355.2	22391	20736.7	19384.6	17943.6	20484.3	19470.6	21414.8	22453	20748.5	21934.7	20827.1	21079.3	18444	18233.1	20879.7	21273.9	18124.5	15322.9	21043.1	19701.4	18408.5	23166.1	20232	20859.8	22275.6	14480.6	21505	21358.6	21066.6	24571.9
M328.96523T9.12_1	328.965	9.12236	-	-		2758.31	2309.95	2617.65	3475.95	2451.66	2689.64	2108.62	3634.21	2831.83	3058.99	3224.3	3232.42	3811.91	3671.89	3044.1	3358.77	3829.95	2673.98	2935.27	3927.59	3724.89	2629.8	4175.89	3974.82	4252.71	3335.46	3305.99	4327.19	3750.66	3098.26	5117.31	3528.13	2590.11	3010.52	2920.24	2722.38	3168.03	2849.4	2759.16	3537.27	3243.17	3538.3	1789.62	1814.44
M328.98991T9.12_2	328.99	9.12077	-	-		2726.26	2839.01	2722.3	3494.22	3069.75	3322.39	3121.26	3498.82	3495.37	2767	2771.95	3064.67	3529	3467.61	2551.57	2814.03	3150.5	2799.34	3231.14	2897.91	2585.71	2788.28	3046.01	2828.21	2762.01	2923.91	2607.86	2322.32	2574.01	2658.47	3768.1	2480.77	2275.85	2509.18	2198.1	2916.68	3068.04	2718.44	2679.16	2817.09	3062	3372.37	2917.33	2704.91
M329.09587T1.21	329.096	1.2105	-	-		4407.59	6604.11	5492.91	6792.78	4801.83	5882.46	5324.96	5968.52	5996.6	6167.61	5148.71	4927.2	7052.51	6370.02	6265.22	6459.38	6207.06	3900.73	6395.63	5771.55	7518.23	5212.49	5077.35	5559.41	7508.64	6357.7	6574.7	5408.15	4869.3	6038.52	4764.16	4640.26	6485.52	6472.9	4843.95	7061.32	8243.55	7673.35	6641.39	4397.8	5730.63	6172.14	6936.58	6663.6
M329.67183T16.79_1	329.672	16.7937	-	-	[M+2Na-H]+ 284.698	4510.97	4291.09	3532.79	4591.48	4090.72	3534.81	4954.63	3950.68	4902.38	5426.1	4787.92	3690.25	3511.69	3479.06	3036.33	4416.14	3282.65	4104.67	3561.16	3353.04	3437.08	3714.34	3748.35	3480.94	4286.43	4784.18	3776.57	3599.07	4501.46	4177.98	3876.43	4383.49	4507.82	4829.31	5991.76	6005.04	3633.95	4008.18	5170.72	3733.73	4570.44	5292.83	4687.03	5577.39
M329.92892T0.74_2	329.929	0.739918	-	-		19346.6	24771.8	24212.8	23834.1	20257.8	22567.1	22254.5	20441.5	20637.1	21292.9	19063.8	20494	20290.5	20920.2	20229	18916.4	20681.3	21394.3	25058.9	21838	21668.6	19689.1	24915.7	19200.2	19702.5	17762.2	22164.3	19723.4	18017.4	23516.4	20739.8	16984.6	23304.3	24954.5	24570.8	20905.6	19261.9	19420.9	17476.5	18857.2	21540.1	17223.8	15789.3	19976
M330.08197T7.41	330.082	7.41391	-	-		7047.01	11393	7090.35	4486.4	5016.72	5889.99	4556.49	8616.31	3369.67	6421.01	8329.4	9185.17	4886.08	6665.1	13173	5729.28	8707.39	6429.01	7200.89	9520.04	11506.5	3436.14	6820.9	4215.51	6230.39	5126.12	5267.28	6612.78	3611.22	4602.38	5069.95	5623.23	5459.63	4763.12	5441.56	4866.53	6740.93	4723.11	2386.67	3687.36	5588.97	8645.57	6620.93	3031.53
M330.1549T9.28	330.155	9.28092	-	-		5014.77	3726.26	3059.71	2349	3036.62	2997.35	3416.97	4478.61	2548.75	2306.54	2577.74	2611.04	2877.81	2645.44	1823.67	1488.79	3390.64	2169.43	4126.91	2019.76	1765.96	1689.24	1971.61	4947.12	2225.44	3751.5	2823.31	3220.41	2484.05	2512.69	2408.59	2878.26	2893.07	3489.54	2379.92	3159.47	3772.51	3901.34	3897.63	2224.38	5463.5	3588.04	2020.03	2820.52
M330.16607T7.78	330.166	7.77593	-	-		4831.15	8902.77	4770.27	1868.06	4909.66	5026.73	6433.99	3802.39	3734.27	5957.02	2983.16	4220.68	4131.08	6039.17	5327.3	2600.85	5573.62	5234.2	4771.01	6838.15	6112.28	7014.86	5375.36	3875.45	5522.51	4867.96	5979.78	4425.35	6459.28	5886.65	4485.65	4739.89	4034.75	6380.8	4828.17	6507.75	5522.02	5972.33	6459.77	4789.68	4991.38	5511.81	5270.29	5692.39
M330.17296T16.8_2	330.173	16.7952	-	-	[M+H]+ 329.17	3111.15	2933.24	3481.99	1512.35	2951.06	2848.32	2708.87	2938.8	2678.46	2920.7	2793.96	2885.44	2280.5	3212.7	2406.37	2323.01	2470.94	3095.51	2653.03	2487.91	2431.93	2409.79	2800.91	2147.76	2640.16	2655.84	2611.81	2699.36	2431.51	2836.39	2125.87	2701.84	2390.32	2452.06	2684.52	2663.82	2781.11	2431.96	2524.68	2654.61	2669.2	2886.01	3140.5	2499.75
M330.43019T0.74_3	330.43	0.739609	-	-		3821.18	3829.56	4873.09	4829.96	4571.73	3883.52	5212.8	3595.23	4421.73	5208.58	5539.1	3428.78	3906.35	3524.38	4550.17	3715.02	4260.18	4782.22	3624.88	3800.54	4710.49	4584.07	4471.13	4508.33	4614.43	3783.78	5734.88	5629.87	4635.14	5230.21	4590.04	4086.1	4772.65	4273.77	4044.39	3606.18	3699.69	4893.44	4178.89	5571.32	5081.26	3460.55	4624.36	4440.45
M330.66987T16.79	330.67	16.7909	-	-	[M+H]+ 329.667	2162.15	2291.24	2355.55	1928.2	2624.12	1998.01	2854.2	2721.65	2233.29	2111.42	3215.05	2241.1	2305.58	2066.54	2313.96	3006.41	2294.78	2570.46	2452.61	1788.35	1779.7	1875.86	2750.59	2728.85	2738.49	1959.85	2198.17	1881.02	1540.02	2360.96	2554.89	2187.29	2004.12	2815.34	2175.88	1956.58	2076.64	2071.67	2586.92	2822.77	2667.03	1792.57	1659.98	1852.63
M330.94497T0.74_2	330.945	0.74013	-	-		8253.28	9789.07	10458.7	7563.87	10510	10243.1	10291.1	8732.68	9926.62	7829.51	8360.35	7984.27	7634.41	7321.8	8773.88	7477.84	7475.4	7293.86	8614.67	8627.55	7268.85	6541.5	7257.48	6648.66	7013.07	8729.99	9893.39	10186	7485.35	8187.06	7552.02	6825.78	8897.81	10053.6	8442.3	10682.2	8964.55	8936.44	7823.07	7483.53	8853.25	9865	9904.97	9838.41
M331.05372T1	331.054	0.997781	-	-		104891	104084	134978	95753	118150	136259	140656	89411.5	150040	118673	101897	86265.8	114592	151912	144223	116495	130473	100345	154089	95902.6	146278	137172	123063	111551	136200	160809	133089	109326	100272	107960	80058.7	99474.2	125289	129685	135764	135987	176206	157841	114120	61557	111100	111212	116019	124746
M331.44583T0.74_3	331.446	0.741153	-	-		3800.44	3783.17	4394.53	4411.01	4909.88	3922.93	4328.32	3590.55	4521.31	4144.88	4489.08	4046.32	4241.21	3756.79	4684.26	4377.76	4791.62	3912.53	5623.59	3630.24	4504.31	4045.44	3195.74	4115.26	3102.46	4545.24	5028.81	4912.84	4011.11	4589.7	3129.84	3342.78	4394.4	4171.96	3837.2	4500.28	3898.73	3798.95	3454.16	3934.52	4562.53	3936.11	3639.42	4246.8
M331.67655T16.8_1	331.677	16.7954	-	-		16583.5	17532	16440.7	15751.2	18021.1	15667.7	14863.1	16728.1	17028	16490.1	15257.1	17208.4	15509.8	15487	15712.9	16817.8	14380.1	17275.7	16788	14335.7	16294.3	16281.1	15329	16771.5	16060.8	17430.4	17038.1	17563.4	16749.6	17879.8	16462.4	15410.6	17787.5	17630.9	16999.6	16632.2	17625.7	16628.6	17300.7	16862.4	16167.2	18776.1	18302.7	16282.6
M332.05684T1	332.057	0.997621	-	-		12224.6	13029.5	14835.3	10722.9	13517.3	13719	16108.1	9848.83	15552.3	13015.6	13579.7	11392.2	14368	15426.2	15604	13807.7	13548.2	11625.4	16881	11264.4	17676.1	15439.9	12513.4	15229.4	18850.5	18119.8	16385.2	14899.4	11061.7	14898.7	8989.59	10969	14598.9	15183.3	16208.6	15762.1	19511	19861.4	15633.3	6536.99	15077.9	12426.6	13789.2	13578.7
M332.17823T16.79_2	332.178	16.7949	-	-		5770.68	5678.31	6933.14	7699.82	7440.88	7417.17	5845.94	6443.71	6759.33	6595.84	5925.75	5630.35	5949.07	5900.98	5009.49	6351.72	5893.34	5246.1	5919.72	5389.78	6342.69	6107.23	6493.64	6485.43	5564.42	6244.23	6220.27	6429.55	6345.47	5721.82	6671.67	5625.15	5598.04	6299.49	5423.07	6332.21	6705.34	6215.8	7102.68	6153.15	5837.21	5911.83	7106.09	5435.48
M332.27977T10.64	332.28	10.6367	-	-		3747.1	4383.04	3869.6	2264.79	5225.78	3537.44	3236.23	5268.84	3880.07	3333.03	4293.28	2583.12	3197.65	3904.43	2015.92	3077.92	3151.8	3250.1	2863.61	1811.57	2235.23	2200.04	2781.03	2741.59	3174.67	2505.53	4812.33	3473.93	2932.11	3572.6	3326.26	2001.81	5265.8	2321.95	2931.49	4459.31	3588.81	3569.73	5106.11	2819.07	2716.48	3386.63	4890.57	3851.63
M332.59651T14.93	332.597	14.932	-	-		2791.06	2221.49	2269.96	2142.09	2333.07	2615.61	1639.67	2813.11	2516.31	2198.86	2039.12	2579.69	2900.39	2833.18	2712.7	2516.47	2538.64	3098.41	3160.28	1984.95	2462.82	3266.25	1791.78	2793.88	2765.08	2262.39	2777.21	2358.98	2707.24	2707.72	2613.61	2431.32	2027.25	2747.69	2080.02	2714.26	2513.78	2037.97	2365.63	2243.51	3045.07	2739.5	2165.95	2228.39
M332.67501T16.8_1	332.675	16.7952	-	-		11506.1	8787.06	8912.68	7818.21	9931.44	8704.43	8370.69	8769.32	8218.19	6869.45	8023.79	9777.49	9021.5	8417.69	7535.64	8191.59	7225.08	8326.23	7341.31	6963.72	6667.87	7769.81	8553.47	7598.23	8951.61	8219.68	8009.71	8292.14	8969.17	7767.29	7952.85	8064.53	8151.05	9332.37	9085.07	8377.19	8543.18	7234.27	8275.4	8617.04	8980.1	8671.16	9110.36	8901.1
M332.68378T17.22	332.684	17.2221	-	-	[M+H]+ 331.68	3372.59	4049.34	2505.79	3053.9	2454.26	2473.43	2980.39	2494.45	2242.9	2963.51	3699.88	3918.16	2047.92	2664.46	2830.45	2195.61	3700.97	692.01	2232.33	2276.49	2060.42	3808.34	2186.73	3021.52	2948.42	2626.19	1707.45	2790.74	2573.69	2938.69	1992.03	2739.52	2471.31	2770.88	1375.25	2242.3	5159.29	2822.61	2542.98	2489.94	2132.28	3233.98	3363.58	3550.94
M332.98882T9.12	332.989	9.1242	-	-		8277.41	7733.59	8938.09	7447.35	7262.34	9201.75	8786.88	9362.54	7880.17	8451	8544.54	8449	9689.14	8469.51	7707.16	7775.36	7435.72	7820.1	8746.17	8675.55	9046.8	7603.41	7778.43	8375.57	9155.83	6589.98	9711.51	8760.45	10058.7	7716.22	8391.49	7691.53	7336.64	8417.46	7503.88	9455.49	9584.35	9481.99	8126.9	8686.36	10100.4	8953.38	8782.25	7611.07
M333.05307T1	333.053	0.996763	-	-		8965.63	9084.33	12833.1	8609.53	9979.39	11248.4	12433.3	7899.22	15390.1	10271.3	8261.28	7725.66	10969.2	13650.7	10678.8	10108.4	12921.9	8259.32	12606.1	10169.2	11838.9	10080.9	10913.3	9535.01	12300	15115.3	11580.9	8958.68	9385.49	8997.43	7401.94	9583.08	12450	11048.2	11731	13404	15062.4	13161.7	8588.93	5025.01	10322.2	9215.21	8719.32	11685.3
M333.44783T0.74	333.448	0.74192	-	-		3431.9	3750.82	2700.71	2989.69	2809.05	3354.74	3226.18	3281	3404.61	3488.41	3117.36	2871.28	3002.64	3366.2	2898.55	3625.37	3961.71	2618.67	3670.7	3256.82	2413.56	2625.67	3359.47	2882.84	3212.65	2954.82	2498.27	3130.57	2461.27	2283.66	3064.84	2218.13	2760.93	2178.76	2654.36	3083.16	2463.29	2811.49	2140.73	2566.72	2564.09	3872.26	2266.63	3315.08
M334.02486T8.83	334.025	8.83003	-	-	[M+Na]+ 311.036 [M+H]+ 333.018	15766.7	20815.9	19247.5	16570.4	17420.1	15261.3	13694.2	16483.4	20442.3	15044.5	14504.6	15883.8	14010.3	22064.9	18351.7	16708.2	16811.3	15472.9	17472	16703.9	20596.9	16938.6	15393.2	5625.95	23050.1	16687.5	17104.6	15022.5	14788.7	16690.4	15876.4	20043.9	15169.5	16179.8	15767.3	22599.5	16367.9	18037.1	17321.6	15641.6	22269.2	17122.7	15773.2	19152.5
M334.14007T8.42	334.14	8.41963	-	-		3605.65	4948.57	6220.71	3790.29	5312.72	4785.7	6622.22	4476.22	4167.01	6288.81	3783.46	5791.6	3380.53	5899.05	4209.65	4119.12	5068.36	4563.73	6907.15	5021.19	7209.2	5563.68	3653.98	6392.07	4354.41	4778.47	5988.05	4074.64	5060.58	5569.97	5274.61	6279.92	5184.74	5892.17	5257.13	5378.08	7005.28	3976.86	3989.38	3228.65	6475.3	7028.79	5611.53	6315.04
M334.18359T17.22	334.184	17.2212	-	-		70351.2	113803	70589.8	64479	73614	83480.2	69280.7	87813.4	74578.8	79637.2	99071.8	87315.4	61035.5	77504.4	81090.1	76767.9	83309.5	31419.4	61506.1	61697.7	59621.5	76931	70945.2	72687.9	92601.9	84360.6	109733	81439.1	83782.3	84623.9	64423	79937.7	80084.6	86384.2	44289.9	78641.7	147253	83161.7	72416.2	66901.4	68362.4	89119.3	80521.9	85701.2
M334.68524T17.22_1	334.685	17.2211	-	-		27219.4	40730.2	26459.2	28329.5	26947.1	33905.3	28781.1	30549.3	29628.3	25102.3	35836.3	32671.7	23057	28300.6	28935.2	27997	34166.4	13477.6	23816.7	21668.1	20081.5	29648.3	24801.5	25551.1	29747.3	30576.1	44695.5	28391.5	29349.9	30832	25374.5	28286.9	28629.8	30197.5	16327.7	29280.6	50401.6	29542	22347.2	26939.1	26257.3	33244.8	26635.7	30694.7
M334.94387T0.92	334.944	0.922328	-	-	[M+K]+ 295.981	12228.3	10679.4	11374.4	9303.14	9618.59	11214.3	11628	9299.93	15176.4	10748.9	9734.26	10226.7	11368.6	11496.4	13973.3	11270.8	12808.6	12509.3	13724.3	11254.7	11064.1	12772.3	11262.7	10340	13479.5	14551.2	13065.2	10745.6	10980.3	11514.9	11394.6	8633.37	13031.1	14930.3	10858.4	13395.3	13711.7	15722.7	10062.3	7738.28	10565.2	14115.6	13349.4	13575.5
M334.98539T9.12	334.985	9.12377	-	-		5743.63	5318.18	4777.93	6523.94	6076.25	5523.75	5101.48	4631.94	5177.38	5194.36	5377.54	5023.72	5985.78	5019.95	5929.9	6000.89	5923.63	4558.74	5676.19	4794.05	5270.86	5249.57	5273.25	5586.63	6306.12	4797.39	5779.35	6734.53	5535.7	5705.15	5596.01	4572.39	5335.75	6459.91	4337.29	4678.48	5805.42	5748.29	5946.22	6672.72	5446.81	5273.44	5484.42	5449.2
M335.02781T8.83	335.028	8.82984	-	-		3596.28	3081.55	4061.99	2424.19	3414.69	3100.57	3548.65	3652.09	3481.78	2545.84	2660.14	3729.31	2529.64	4769.6	4636.09	3117.38	4169.88	3515.45	3394.97	2863.05	4576.83	3597.74	2737.35	1794.88	5573.28	4167.7	2925.06	3537.25	3200.13	3425.97	4430.43	5103.18	3166.86	3236.47	2942.33	4160.49	3716.38	4087.03	3905.6	4123.27	4079.29	2804.68	3251.51	4231.59
M335.04561T11.15	335.046	11.1515	-	-	[3M+2Na]2+ 208.036 [M+Na+HCOOH]+ 266.056 [M+Na]+ 312.059	3982.55	2817.53	2734.3	1959.83	3080.07	1902.82	2905.1	2679.1	2006.81	2691.16	2303.48	1946.79	1923.35	1894.3	2893.49	1820.47	2473.26	2704.37	1777.68	2132.22	1929.49	2566.13	1771.55	1821.92	1670.26	2936.17	2662.62	2660	1455.03	2255.39	2447.91	2002.63	2047.2	2829.8	2786.96	2325.42	2853.06	2417.6	4012.61	2597.95	2613.61	2998.59	1965.52	2825.32
M335.0976T15.24	335.098	15.242	-	-	[M+K]+ 296.138	3140.92	3133.43	3027.15	3164.76	3137.56	3028.26	3097.85	4380.44	3550.27	2484.4	2996.6	2703.01	2215.34	2811.1	2571.49	3829.71	2526.8	3164.42	2866.75	2489.62	2658.22	2754.01	2930.53	2576.63	3200.88	2805.28	3467.77	3428.31	2200.21	2923.44	3309.17	3533	3293.5	2403.97	3728.63	3378.72	3822.55	4730.16	4538.27	3390.82	3714.75	3300.36	3131.82	3815.99
M335.15164T17.55	335.152	17.5511	-	-		15813.3	14342.2	16193.5	11278.8	14425.7	15453.9	11700.5	12380.8	18678.6	17184.2	14896.2	14940.4	14359.2	15503.4	15746.1	11126.9	10557	11591.4	14041.7	12181	11283.5	12376.3	12647.1	10624.1	17553.9	16600.5	15928.6	13575.9	12515	13370.8	15014.9	13687.1	14535.8	23739.3	15077.6	13305.8	17885.9	15894.4	13889.5	14925.4	9696.17	15302.9	19629.7	17489.7
M335.18208T17.22_2	335.182	17.2212	-	-		31248.6	52027.6	32576.7	34436.6	35684.1	40402.4	31490.2	38261.8	31332.3	36636.6	43968.3	36356	27539.4	34909.7	37616.8	31274.3	40941.6	14070.9	31693.5	27518.5	23806.6	35292.3	28901.1	30043.3	38541	34616.6	47967.2	38528.3	34604.9	38935.9	31638.1	33105.2	33767.4	35834.3	16122.7	32981.7	59834.1	35265.2	30108.3	28520.4	31001.1	39231	36113.9	36728.1
M335.60094T15.24	335.601	15.2439	-	-		3186.2	3069.36	2669.29	1803.03	2828.06	3272.91	2432.18	3347.14	1991.99	2504	2342.84	2850.32	3037.88	3243.72	2823.01	2685.6	3095.65	2746.92	3096.52	3166.39	2769.9	2679.36	2828.92	3021.38	2880.58	2674.26	2952.42	2668.44	2565.48	2101.35	2333.73	2495.71	2660.26	2993.07	2294.65	3503.8	2852.75	2858.85	2703.28	2782.3	3020.92	2388.95	2665.22	3679.38
M335.68306T17.22_1	335.683	17.222	-	-		12775.5	20048.5	11628	12549.4	12258.1	14158.3	11557.4	14166.8	11074.9	12287	13828.9	15247.9	9779.54	12136.9	13167.2	11953.8	14530.2	4824.16	10019.8	8966.85	9823.31	11730.6	10695.2	11600.3	12332.6	12960.8	16522.9	12585.8	12737.8	12889.6	10324.5	11873.8	14119.7	12577.3	4633.26	11900.7	22036.7	12716.4	10427.1	9546.06	10340.3	13248.7	12237.7	13576.7
M335.97751T1.22	335.978	1.21571	-	-	[M+H-CH2]+ 348.986	2301.3	4315.26	3153.25	2564.12	3454.67	4140.62	2817.86	3805.28	4849.49	4036.94	4275.11	4435.08	3251.95	4052.12	7831.23	2655.3	4018.77	3813.69	2930.88	5527.2	5800.91	4121.06	2973.89	1845.68	3837.18	5939.37	3191.67	3351.79	3013.54	2890.31	5419.32	5094.06	2801.34	6289.97	5740.81	3555.52	3644.63	7302.58	3653.07	3747.22	2617.03	4333.51	4312.3	2603.95
M336.01579T0.84	336.016	0.835681	-	-	[M+K]+ 297.053 [M+Na]+ 313.026 [M+H]+ 335.008	2639.45	3366.98	3353.59	3855.31	3542.45	3533.95	3337.23	3666.54	2639.56	2794.6	3886.68	3446.34	2776.85	3234.86	1964.86	3693.36	2886.33	3695.51	3885.55	4026.59	3012.09	2481.95	2816.04	4906.52	2993.76	1629.05	3629.04	3193.47	2809.13	3578.6	2992.3	2849.47	3022.11	2287.71	2243.6	3229.23	2532.55	2392.3	3150.97	2748.45	3386.14	2474.99	2384.41	2458.51
M336.15531T17.55	336.155	17.5513	-	-		3502.55	2989.69	2746.44	2272.03	3378.99	3740.76	2545.46	3373.34	3927.58	3019.8	3456.69	2542.39	2533.18	3241.96	3552.16	2240.93	1545.19	2447.8	2647.55	2348.19	2744.25	2944.16	3498.22	2628.78	4683.15	4093.24	4185.2	2896.83	3252.87	3059.03	3385.06	2985.15	3751.82	4729.58	3710.3	2892	4777.81	4531.99	3146.91	3325.67	1990.15	3540.56	4587.65	3396.81
M336.18182T17.22_2	336.182	17.2221	-	-		6269.92	10579.8	7545.99	4964.61	6741.53	8644.89	6426.58	8394.84	5739.36	7267.34	9184.96	7278.28	5945	7483.61	7868.23	7670.9	7960.4	2330.4	6133.74	5884.66	5468.9	6940.6	6446.17	6669.81	7260.98	7767.89	8765.19	7175.32	8386.19	7887.84	5628.21	7315.26	7703.8	7984.71	3093.7	8028.85	13178.9	7191.49	7644.95	6770.78	6652.72	7631.85	7456.2	8269.81
M336.32594T19.76	336.326	19.7633	-	-		2058.66	2523.46	2735.13	2775.85	3646.83	3895.57	-188.485	206.649	3016.14	11269.8	10766.5	4182.22	2031.45	1074.55	2675.41	53.373	2528.02	2818.65	2852.91	-230.288	6246.89	-241.236	10191.9	30803.6	1914.92	683.399	15258.9	47493.4	41501.5	6645.67	5879.62	11638.1	4923.38	12942.5	3682.57	10238.7	9543.9	6049.48	3752.66	7549.74	12707.6	2264.35	13237.1	3741.38
M336.60037T15.24	336.6	15.2436	-	-	[M+K]+ 297.631	1235.23	1859.54	1433.23	1265.99	1859.24	2140.7	1490.92	1754.5	1588.62	1267.48	1699.87	1484.83	1567.12	1732.51	1924.17	1690.67	1179.29	1710.29	1963.2	1808.11	1298.88	1485.88	1268.24	1134.96	1306.42	1367.18	957.018	1092.74	1268.72	1326.29	1382.3	1718.6	1331.67	1625.95	1317.12	1414.75	1131.79	1372.15	1372.65	1083.59	1451.11	1921.99	2066.61	1957.1
M336.68259T17.22	336.683	17.2242	-	-		2843.14	2995.87	2084.93	2406.9	2526.05	3401.38	2083.84	2330.81	2674.51	1860	3150.44	3540.05	1852.79	2335.26	2534.54	2620.95	2843.75	1158.36	1609.43	1745.46	1510.49	2285.1	2076.23	1726.36	2331.1	2264.76	1563.39	1943.3	1596.82	2495.6	1844.65	2122.5	1963.8	3021.5	707.658	1974.12	2926.34	2738.61	2279.72	2692.53	1950.09	3002.72	3014.34	2424.79
M336.94112T0.92	336.941	0.922328	-	-		8645.73	6741.24	8618.27	7376.23	6489.89	7085.3	8043.07	6246.22	10418.1	8138.94	7188.66	7762.63	8725.45	7969.45	11215.2	6930.4	10437.4	7528.24	10024.5	7864.4	12246.6	10422.9	8375.8	7145.07	12375.4	12911	10798.5	8679.61	10456.9	9128.28	8561.84	7579	11437.3	12822.9	9039.71	9971.71	11603.6	13139.9	9544.88	6326.95	7230.44	8743.75	8422.17	9847.4
M336.98407T9.12	336.984	9.12377	-	-		4176.1	3898.86	4093.37	4242.74	3605.49	3978.26	4124.73	3568.9	3570.07	4410.71	4189.75	4029.19	5364.07	4695.73	3223.39	3178.77	3079.8	3842.06	4184.23	3563.88	3855.46	3325.24	3291.1	3552.06	3901.21	3089.03	4306.1	5016.09	3366.26	3314.63	3845.99	3860.97	3669.72	3803.89	2678.46	3998.17	3366.82	4116.85	3228.4	4194.68	4151.93	3626.9	3669.42	3810.34
M337.01471T1.15	337.015	1.14854	-	-		16911.1	16247.8	16667.3	15965.5	16321.6	15600.8	15494.8	13275.3	15066.3	15030.8	18919.1	16142.9	15892.6	14271.9	13024.3	15587.9	14825.4	19503.7	16581.9	17375.6	15577.9	15836.6	15572.1	17267.1	14769.7	16506.7	13915.2	17501.3	14058.6	15952.5	16847	17191	16929.6	16695.3	17020.6	15592.4	16006.4	14791.6	15164.4	16164.5	18249.9	16475.3	14911.2	17888.5
M337.14729T17.55	337.147	17.5507	-	-		7334.48	5632.16	5496.42	3177.25	7703.71	8298.27	5590.69	5424.06	8597.58	6945.59	6782.2	5832.35	6648.54	6937.04	6657.35	5252.98	4919.71	5286.73	6796.33	6097.63	5926.4	6155.11	5886.22	5249.02	9097.9	7340.61	8984.84	5385.21	5782.72	5679.78	7534.79	6005.92	6125.8	9452.68	6621.24	6241.95	6023.8	7305.21	5079.41	5983.79	4180.05	6344.99	7648.88	6371.62
M338.00839T8.98	338.008	8.98479	-	-		5089.65	4996.23	4110.49	5844.12	5871.25	4224.47	3085.11	3799.24	4217.04	3222.34	4268.82	5468.68	4357.9	6510.28	5283.48	5902.85	4841.81	5237.88	5759.87	3883.49	5084.11	6551.88	3826.68	1748.25	4488.29	7116.49	7143.26	5544.21	6545.47	6368.69	5351	7705.94	4324.49	4567.22	5760.28	5554.23	5651.25	6232.07	4666.4	5160.38	5611.23	5596.68	5050.61	5291.43
M338.34176T21.26	338.342	21.2648	-	-		19122.7	26732.6	44143.8	29299.9	35811.1	44335.7	18001.2	21267	25364.3	105802	107865	52247.3	17997.3	24120.1	21263.1	12597.7	24249.9	27535.8	23170.5	8181.52	41186.4	9785.85	91319.2	202104	19749.1	15607.4	95243.6	268602	260609	47094.3	49539.3	92689.7	44600.7	91794	29405.7	68169.6	61570.7	39342.5	27898.9	70192.4	77956.1	8036.89	108927	33469.1
M338.59658T14.72_1	338.597	14.7168	-	-	[M+2H]2+ 675.178	7637.11	5410.16	6588.11	5794.4	7231.3	7385.79	6396.47	5227.81	7322.97	7382.75	6267.54	6764.07	10722.6	9113.5	8224.35	10862.9	8659.66	7395.25	8435.03	10269.8	8926.11	8705.36	8539.8	9424.78	7995.65	7191.82	8797.79	6179.95	6995.17	7075.45	7451.04	5593.48	6559.22	5512.66	6660.67	6587.39	6993.46	5801.23	7244.75	7427.9	6697.08	6629.8	7008.15	7306.39
M338.60558T15.62	338.606	15.6223	-	-		2932.73	2695.32	2742.61	3110.54	3315.25	3300.77	2948.67	2957.95	2923.78	3218.03	3166.99	3056.82	3051.85	3222.03	2745.37	2839.5	2619.93	3272.68	3120.42	2803.04	2610.29	3046.64	3300.62	3105.49	3158.49	2987.33	2877.63	3158.71	2995.67	3273.4	3911.79	3633.27	3346.97	2725.73	3155.08	3289.65	3026.81	2628.63	3893.68	2850.63	3352.41	2655.64	3398.72	3045.9
M338.9344T0.74_1	338.934	0.741153	-	-		11232.1	12849.2	12675	11769.9	13881.8	13315.5	13298	12291.2	13410.1	12901.5	12181.7	10155	10768.8	12495.3	11055.5	11471.8	9476.91	11613.3	12126.6	11240.1	10543.5	8977.88	13298.9	11550.6	8927.73	9219.94	13331.8	11377.2	9014.88	12069.5	11059.4	8536.39	12556.5	13936	14894.9	12858.7	10567.4	11367.9	13579.9	10576.1	12476.5	10552.7	11216.3	11940.9
M338.98463T0.93_2	338.985	0.92836	-	-	[M+K]+ 300.02	14374.9	14208.5	13350.8	10791.8	14803.4	12027.7	20557.3	13193.5	12100.5	13876.4	10249.5	11027.4	23218.3	16461.4	16142.4	13590.3	15868.5	13021.4	14298.8	15356.5	14921.3	16936.1	14211.4	14304.8	15466.6	17318.1	16826	13222	17749.9	12738	25105.5	12581.1	14266.5	14587.9	14292.9	15667	16509.7	18345	13695.4	12987.9	12412.2	14723.5	13770.7	11586.8
M339.26463T11.56	339.265	11.5615	-	-		266.789	3036.66	3876.2	1693.43	7181.7	4384.35	6190.56	7303.42	10957.9	2187.44	9996.56	4627.62	3065.29	1727.39	2628.9	8572.06	3987.43	3341.91	3873.18	2187.26	5158.88	1518.27	11217	-498.412	17224.4	4160.1	10930.3	9306.14	8197.64	3647.86	4003.35	-995.624	5857.67	2895.73	1664.62	19310	7258.79	6066.7	3562.68	385.224	5904.61	4584.67	10213.1	5751.95
M339.34511T21.26	339.345	21.2633	-	-		5263.28	7612.86	9762.62	6781.15	8244.83	11047.1	4689.7	5272.9	5182.51	25855.8	26412.6	12659.3	4639.7	5795.26	4777.11	2884.51	6752.83	7310.86	5936.69	1597.48	11029.2	2419.84	20615.8	51398.4	5518.26	4244.95	23050.9	69172	59314.1	11309.8	12724.2	20682.9	9443.4	21533.2	6931.15	18112	14894.5	9807.72	6799.95	18072.7	18123.2	2872.27	25724.7	8678.04
M339.43501T0.74_2	339.435	0.741153	-	-		2168.48	2785.75	2997.71	3474.99	4245.85	3151.05	2710.29	2382.46	2478.73	2505.85	2792.18	1741.61	2262.65	2859.88	2393.09	2675.67	2333.94	3045.39	2775.68	2863.67	2969.5	1951.16	2658.88	3020.46	1810.43	2413.44	2267.43	2273.29	2474.29	2943.08	3107.01	1953.15	3098.78	2748.27	3559.59	1857.25	2339.35	2937.96	2849.87	2132.13	3282.3	2989.35	3382.46	2382.22
M339.59559T14.72	339.596	14.7174	-	-		6763.89	5407.9	4096.57	4488.32	5205.05	5711.94	5353.06	4792.18	4803.02	5073.2	4370.61	5638.61	7126.42	6326.77	6736.89	7015.59	5851.17	6088.33	6803.96	6065.9	6251.47	5770.99	4930.02	7552.3	5978.75	5919.48	6241.33	5143.18	4614.46	5186.66	5399.19	5349.93	4753.96	4809.64	4687.08	4407.24	4785.45	4892.2	4792.11	5730.71	5011.92	4125.23	4207.15	5561.32
M339.60426T15.38	339.604	15.379	-	-		6464.81	7882.15	4984.42	6765.2	5448.65	7655.84	6315.94	6589.99	6733.62	5354.18	4947.94	5844.47	6095.32	7209.14	7871.41	8017.64	7985.86	7035.74	6255.02	6828.09	6187	7079.96	6235.24	7280.83	8265.9	8732.96	6421.34	7007.52	8140.67	6408.76	5844.3	7016.6	5829.32	4737.29	4715.71	4962.99	5801.89	7067.92	6297.59	6312.49	4971	7182.63	5380.17	8144.25
M339.60437T15.78	339.604	15.7755	-	-		7055.23	7027.39	8446.36	5745.59	6121.99	6587.88	6376.96	5177.5	6194.88	6763.03	6203.67	5863.56	6315.81	6931.66	7074.66	6847.78	4963.64	5707.7	5271.67	6152.93	6364.95	7554.77	7250.19	6177.95	7900.63	5899.4	7397.25	6824.94	7283.13	6078.5	6221.27	6686.07	7395.16	5747.05	6909.99	5765.86	6215.61	5856.68	7268.14	6011.4	6190.59	6177.18	7046.97	6194.47
M339.60446T15.62_1	339.604	15.6237	-	-	[M+2H]2+ 677.194	15867.7	16908.4	16037.4	14655.1	15918.1	19718.1	16026.2	15736	17393.4	16227.5	15952.5	18059.4	19069	20660.6	18670.8	19984.8	18483.7	19559.2	19578.1	17582.5	18070.5	20447.8	17960.9	18193.2	18947	16345.8	17298.9	16498.5	17339.7	17518.2	18940.9	16254.8	15887.7	16278.5	17410.9	16590	16249	17599.9	17481.6	17558.7	16609.9	15870.4	16318.8	18694.2
M339.98762T7.88	339.988	7.8838	-	-		6011.67	4474.78	2352.87	4166.73	3517.41	4400.42	3943.34	4627.86	3973.23	4712.74	2651.22	4889.2	1530.24	8000.56	5341.26	2632.42	4598.88	4726.66	2574.19	3337.42	3348.96	3137.03	1597.37	790.199	4334.35	5044.17	4522.31	4750.08	8226.91	6306.21	7675.2	9407.08	5849.74	3036.18	4725.21	6808.04	4695.99	6661.13	5933.33	3558.49	5248.87	4189.53	5342.28	6448.6
M340.10565T15.62_2	340.106	15.6247	-	-		5878.1	6517.06	7270.21	6222.78	7869.14	9881.72	7760.36	6726.93	8275.35	7329.84	8406.55	7744.3	8787.19	8474.24	10488.3	10068.9	8482.39	8209.8	9260.88	9366.8	8245.52	9714.96	7383.79	7284.48	8889.3	7426.51	7133.8	7497.88	9688.23	7381.73	7174.96	7018.02	6574.39	6556.42	9122.01	7278.47	7170.72	7361.07	6925.03	8228.88	7633.19	8021.46	5695.91	7352.63
M340.59406T14.73	340.594	14.7282	-	-		3086.13	2638.64	2467.5	2398.03	2053.47	3028.75	2631.47	2880.31	2906.13	2887.61	2581.43	2671.6	3518.67	3339.29	3788.12	3297.1	3070.25	4013.82	4323.95	3777.86	3690.68	3950.22	3022.54	4258.1	3621.51	3193.85	3157.79	2364.62	3426.98	3118.19	2919.41	2698.83	2608.68	2892.49	3022.33	3129.82	3129.59	2904.02	2503.56	3113.88	3213.8	3061.84	3059.08	3187.66
M340.60322T15.78	340.603	15.7771	-	-		4576.37	4643.01	4098.63	3291.04	3496.96	3630.73	4203.32	4042.34	5994.59	4491.88	4489.26	5110.34	3709.54	5031.07	6016.8	5645.53	3809.45	4131.94	4366.22	4679.49	4572.04	4622.72	3545.38	5028.74	6393.18	5472.02	5215.44	4271.36	5049.12	4784.6	4792.73	5693.26	4867.4	4864.75	6822.1	5339.44	5704.03	4937.13	5754.85	4865.9	4954.92	5584.28	5183.22	5603.41
M340.60335T15.62	340.603	15.6227	-	-		11055.4	10135.9	10790.5	9403.8	12143.7	10607.2	10829.2	8874.37	8810.85	9839.36	10058.5	9572.84	9216.08	12122.8	9632.34	9100.39	9750.04	10166.2	11739.5	10747.4	10560.2	11244.7	10566.9	8785.45	12225.2	10721.5	10467.3	10627.6	11243.6	10268.8	10558	11024.1	10426.4	9368.48	11101.4	11579.1	12283.1	8587.32	11117.4	10898	12688	11499.8	9451.88	12108.7
M340.61203T16.79	340.612	16.7942	-	-	[M+2K]2+ 603.303 [M+2H]2+ 679.21	2594.54	1601.28	1739.99	1609.32	1546.65	1685.87	1767.5	1359.08	1642.81	1573.33	1799.35	1700.41	2795.6	2028.65	2226.76	2432.94	2011.3	1658.64	1828.53	2638.03	1966.03	1645.55	1927.37	2228.14	2177.99	1967.85	2054.93	1648.34	2018.91	1673.39	1658.5	1510.07	1740.18	1497.2	2548.32	1506.78	1972.69	1990.3	1651.77	1687.48	1949.72	1814.94	2176.78	1891.84
M341.01011T10.22	341.01	10.2164	-	-		3406.54	3991.96	4275.39	2429.85	3998.81	2804.91	5257.3	2625.7	3278.1	4106.08	5872.08	4028.53	3269.36	3996.3	2954.04	2722.27	2255.11	2511.47	2508.07	2336.74	4512.88	2595.63	4848.04	3051.24	3447.39	2017.99	4547.36	5646.39	3947.03	2057.31	3068.03	3265.6	2168.95	4788.61	3345.2	4106.36	3927.14	2701.1	2970.22	2307.07	3411.17	3427.08	2405.72	2018.43
M341.5922T14.75	341.592	14.7456	-	-		3430.56	5143.72	2563.17	3781.84	1854.18	3464.88	3208.53	3132.54	1854.08	2844.27	2617.37	3190.61	3321.19	4212	3857.12	3918.83	3878.9	2913.14	2719.48	2727.13	3303.96	4030.34	3989.64	3027.93	3007.69	3242.38	4288.44	3290.02	3863.83	4223.84	3046.42	3059.79	3395.4	3077.31	3220	3863.87	3357.2	3612.26	4610.26	3219.99	3575.16	3567.78	3464.71	4333.58
M341.6114T16.8	341.611	16.8012	-	-		2327.16	2130.48	2440.49	2223.47	2232.48	1969.27	1950.63	2496.05	2077.25	2044.25	1943.13	2022.5	1802.55	2229.21	2259.31	2240.22	2110.29	2213.41	2124.9	1425.51	1921.24	1881.32	2040.39	1661.94	2379.3	1742.29	2214.96	2533.88	2431.28	2814.9	2697.42	1952.93	2166.2	2014.95	2168.69	2025.75	2239.04	2250.15	2307.31	1840.93	2208.19	2366.57	2687.57	1728.56
M341.99733T9.12	341.997	9.12397	-	-		3743.92	2437.76	3113.78	2740.33	3061.48	3501.56	3180.79	3620.38	3031.56	4023.03	3766.58	3273.26	4211.44	3706.57	3819.69	3013.28	3310.54	3841.98	3469.08	3666.76	4012.18	3613.35	3226.44	4064.96	4454.31	4628.73	4291.32	3456.74	4754.56	4143.69	3987.29	4156.43	3554.63	3948.52	3455.33	3556.47	3650.16	3195.56	3739.05	4181.31	3898.78	3607.8	3819.98	3950.8
M343.00386T9.12	343.004	9.12339	-	-		3110.66	2873.6	2935.11	2371.03	2617	2426.25	2480.88	2113.26	2520.07	1994.13	2563.15	2497.67	3055.55	2868.69	2276.95	2722.78	2437.76	2543.39	2373.78	2660.95	2534.08	2542.65	2470.05	2975.96	3127.31	2595.37	2840.51	2248.96	1978.83	2171.44	2414.74	1920.95	2425.08	2559	2239.36	2454.8	2544.01	2419.93	3318.93	2378.21	1991.32	2538.03	2749.07	2122.22
M344.01423T1.81	344.014	1.8144	-	-		4062.28	4698.97	3842.17	4527.27	4140.87	3697.03	4131.61	3934.64	4053.88	3777.71	3769.76	4172.07	3942.18	4563.57	4177.98	4334.29	4501	3853.27	3989.59	3531.38	4207.53	3755.47	3606.5	4610.8	3833.11	4313.81	3393.74	4411.17	3693.06	4207.43	4562.27	4049.34	3965.35	3483.76	4246.01	3681.4	4213.39	4039.41	3369.12	4854.32	4161.37	4458.53	3722.42	3552.25
M344.0142T0.98	344.014	0.980846	-	-		6017.26	7907.96	4602.62	6369.9	6192.36	4633.18	6801.9	5829.92	4307.11	5473.55	6440.27	6160.14	7149.89	4181.92	5045.86	7189.36	6865.93	6113.26	5821.01	6077.33	5874.18	6104.97	6839.63	7648.58	5904.8	5100.73	7268.22	6958.38	5914.53	6472.26	7142.39	6719.35	4696.24	4623.39	4978.22	4406.88	4332.33	2903.79	4703.89	6138.44	5386.04	3847.22	4194.25	5315.99
M344.0142T1.42	344.014	1.41745	-	-		6239.9	5455.09	6083.66	5287.93	5277.34	5745.68	5062.81	5832.6	6237.42	6717.65	6363.86	6038.62	5648.25	6384.97	5605.97	5879.19	5620.19	5388.61	6189.2	5859.83	6502.32	6294.71	5225.41	6075.72	7507.82	6580.76	6228.69	6193.36	6231.44	6363.23	6378.95	6495.31	6063.74	5469.05	6384.14	5473.47	5841.87	5753.17	5101.07	6294.62	5847.9	5625.19	5341.78	7183.95
M344.0142T2.1	344.014	2.10193	-	-		2896.53	2581.3	2298.18	2366.56	3429.04	3028.52	2872.56	2673.57	3150.67	3691.47	2755.66	2831.51	2796.62	3469.51	2931.58	2328.8	2850.23	2857.12	3441.27	2673.57	3205.84	2612.5	3473.36	2731.61	3169.39	3124.73	2697.54	2523.84	3024.58	3024.17	3469.83	2732.59	3135.57	3007.51	3508.25	3100.02	2926.08	3037.96	2955.63	2609.87	2904.08	2894.15	4423.05	3299.99
M344.01437T2.45	344.014	2.44947	-	-		2282.59	2322.72	2442.24	2253.43	2580.06	2019.2	2658.86	1816.98	2353.53	1902.1	1727.97	1834.59	2025.64	2488.79	2318.97	1650.05	2626.28	1789.61	2295.92	1761.56	2208.39	1854.7	2196.96	2106.27	2556.13	2237.15	2245.55	2268.55	2205.91	2291.42	2177.78	2131.18	2666.5	3123.63	2544.81	2513.02	2470.89	2798.2	2594.06	2596.68	1984.03	1946.01	2696.76	1857.6
M344.01438T1.14	344.014	1.13532	-	-		4570.62	4784.21	4973.01	5262.68	4985.76	4919.64	5549	4685.91	4404.81	5518.27	5696.21	6442.78	6067.54	5230.32	5458.94	5129.57	5051.68	4972.24	5359.48	6192.31	5799.65	4370.9	6996.65	5470.85	5035.12	5454.54	5088.5	6938.83	6226.6	4784.1	7163.81	5054.49	5117.43	4350.41	5368.93	4989.06	5014.1	4186.79	4431.19	5199.29	4753.14	5411.11	5817.61	5211.64
M344.10235T15.24	344.102	15.2443	-	-		8649.84	6302.89	6251.57	6594.74	5680.18	6422.53	6718.66	7710.41	7189.86	6494.33	6044.33	5531.19	6033.52	6187.23	5914.23	4618.97	6273.53	5492.78	5507.3	6553.13	4601.27	4747.18	5658.12	6454.6	5198.06	5166.62	6218.71	6088.63	5836.7	5459.31	5232.38	6605.63	5539.91	5301.45	6334.89	6656.97	5533.85	5612.72	6614.17	5555.5	5526.01	5863.72	7038.81	5006.44
M344.17065T9.76	344.171	9.75763	-	-		28184.8	17562.2	16618.3	16090.3	19458.5	21208.8	14136.7	23808.6	49549.5	19414.8	15288.6	18115.1	23966.6	28746.9	29208.5	20047.3	17147.6	17114.8	11667.6	19040.2	16037.3	19841.2	20984.5	9510.14	61267	22480.1	24295.6	20035.1	17312.3	19744.6	11714.6	32614.9	28528.1	32437.9	16339.3	31112.5	16837.7	22806.4	51433.2	13046.9	19141.1	31657.1	28323.5	18884.6
M344.25876T16.05	344.259	16.0511	-	-	[M+H]+ 343.249	4586.79	5529.33	4135.68	3671.59	4156.18	3374.25	4122.79	3918.88	4029.91	99.0282	4527.93	2033.13	3894.34	4067.08	4598.75	4387.14	3912.89	2845.48	3283.93	4143.87	2596.1	4171.7	4005.66	4116.27	6055.23	4283.3	5265.04	4594.05	5346.59	4675.69	3467.24	4184.99	4420.4	4513.41	2593.4	4288.73	10470.9	4692.29	3405.7	5110.96	4468.1	4199.18	4167.21	4310.18
M344.58614T14.04	344.586	14.0424	-	-		4807.18	4865.32	5560.04	4079.84	4286.87	3788.2	4118.52	5821.89	4616.3	4984.82	6645.23	5200.89	3287.91	5337.43	4153.16	3160.25	3530.46	2423.95	3073.77	3468.37	3543.7	3612.74	3332.48	3591.18	4360.83	3682.5	4991.6	3879.19	3071.84	4477.75	3874.11	3829.54	4375.28	4549.69	3796.92	4015.57	5213.48	4273.3	4132.81	4369.23	2705.82	3540.8	5269.6	5632.71
M344.60494T15.24_1	344.605	15.2431	-	-		1725.4	3123.94	2273.09	2451.48	2377.42	2490.42	2722.82	3094.48	2996.57	3464.98	2652.13	2339.36	2407.86	2740.16	2403.3	2439.55	2537.99	3435.63	2377.93	2475.51	2194.19	1848.57	2465.26	2494.71	1959.75	1851.38	2838.94	3277.93	1876.35	3355.42	3333.38	2521.78	3374.19	2310.81	3066.29	2696.62	2734.95	2567.04	3241	2767.28	2672.14	2878.99	2670.92	3036.97
M344.8755T0.74	344.875	0.737347	-	-		42622.7	41527.6	44197.7	38874	46885.3	43632.7	46732.9	38950.1	46971.3	42705.6	40737.4	42975	42412.2	36750.9	39354.2	43131.9	39224.7	41990.6	47751.2	45055.6	46682.7	48989.7	45805.6	46069.1	37634.2	37338.9	43240.6	35415.6	39070.4	41532.7	35858.7	35408.1	47532.9	43561.7	41114.5	39488.4	46067.9	41183.2	43178.3	33367.1	43775.3	38932.6	38186.1	44152.4
M345.00469T9.12	345.005	9.1242	-	-		4112.27	3423.32	4167.1	4774.26	3403.22	3176.07	3448.33	4367.98	3411.31	3175.81	3105.89	4110.24	3206.77	3709.39	3096.6	3571.76	3420.13	3117.4	3884.78	2933.43	3350.8	3958.13	3026.85	4248.97	3193.21	2851.57	3130.21	3023.86	2894.53	3824.78	3096.82	2445.55	3070.39	3295.6	3264.29	2466.73	3103.13	3538.04	3697.19	3255.47	4136.24	3944.81	3400.19	4397.43
M345.10099T15.25_2	345.101	15.2462	-	-		3148.21	2391.93	3988.09	2744.92	3566.07	2808.41	3876.99	2895.03	3371.29	3257.44	3481.61	3037.54	3114.73	2741.02	2663.12	2508.25	2706.84	2926.16	2773.03	2524.56	2556.25	2672.53	2278.51	2531.53	2685.95	2623.54	1856.2	2401.12	2443.98	3044.77	2571.68	2205.65	2883.36	3161.42	3258.89	2810.83	3131.79	2553.99	2822.85	3033.59	3401.43	3219.84	2828.37	2540.51
M345.59392T14.72_1	345.594	14.7174	-	-		8786.87	8692.58	8675.76	9442.89	10875.5	7420.78	7999.81	8787.81	9827.8	10380	10182.3	10051.5	5537.36	7829.32	7442.72	6946.82	8738.62	7791.75	6817.23	7305.56	7439.38	8093.31	6442.69	10220.5	9880.17	9047.76	10304.7	9552.91	9496.03	11692.1	9867.61	10440.6	11123.9	10682.4	9304.07	9645.8	9443.22	9000.57	11636.5	10573.8	11446.9	9660.51	8967.74	8150.1
M345.60632T15.24	345.606	15.2419	-	-		4788.39	4095.54	3111.01	4669.83	3755.94	3557.28	3249.58	4620.33	4419.19	3211.98	3588.22	4458.7	4129.42	3935.05	4323.21	4642.95	3995.56	3003.54	3840.54	3681.67	3566.8	3816.6	3371.58	3570.88	3503.68	3558.98	3390.81	3049.1	3558.71	3682.94	2778.55	3533.81	3643.74	3214.29	3362.53	3627.26	3540.48	3346.74	3507.18	3091.85	3603.77	3757.63	3951.77	4757.4
M345.69196T17.23_1	345.692	17.2256	-	-		4876.08	7502.5	5386.75	4304.49	5137.52	4819.31	5904.91	6114.69	5786.12	6636.04	6572.12	6704.51	4262.14	5931.4	7067.58	5320.7	7923.43	1304.68	5315.42	4022.41	4526.78	5281.27	4622.55	5584.25	4995.52	6348.51	8652.37	5292.14	5622.41	6234.35	5642.91	4913.46	5696.37	6576.48	3651.65	6138.37	9342.81	5215.95	4704.01	4526.6	4603.41	6803.09	5646.62	5372.89
M346.00958T0.98	346.01	0.980846	-	-	[M+H]+ 345.002	88182.9	96179.9	73569.3	103140	69575.2	77768.1	81521.9	100587	74447.4	86767.3	93924.7	92902.5	96568.8	78580	69479.5	94683.3	102452	86910.5	66105.8	104098	80793.1	77915.1	100861	97901.2	76775.6	72747.2	84383.8	92791.6	102485	91494.3	103141	116208	74200	85429	82591.2	80967.7	73187.7	64364	74834	119269	93445.8	90184.7	73911.8	78736.4
M346.00962T1.33	346.01	1.32945	-	-		81630.2	74126.9	80222.6	103813	81030.4	78265.8	78244.7	81766.8	79550.7	77772.6	80486.4	75526.5	82548.7	79118.9	84999.2	81434.4	85155	79462.7	79331.3	82572.1	82808.5	76895.3	82633.2	82831.7	81847.4	84952.8	96956.3	83091.5	84605.1	84468.7	79206.4	81470.7	79177.9	104322	78653	81820.6	78507.9	77934.6	72764.8	125055	80597.6	85131.1	77580.5	84662.7
M346.00966T1.14	346.01	1.14318	-	-		82380	76296.2	76920.5	82932.7	76341.5	76980.4	73795.4	74649.4	76575.4	77635.8	80582.4	79082.8	75385.8	80065	77267.8	75401.6	83230	86918.4	79427.2	73742.9	80114.8	67942.9	76428.5	118414	83892.2	77129	78815.6	105418	81779	80989.1	81342.6	85546.7	72550.3	74866.6	81184.2	74714.1	71887.2	66061.4	78020	90756	112054	76976.3	74810	77380.3
M346.08968T14.04	346.09	14.0421	-	-		3626.69	4144.26	3735.32	3207.68	4548.25	5401.98	4221.37	2767.46	4016.7	3476.37	4276.46	4439.69	5555.05	4928.26	4899.19	5645.57	3787.16	3531.3	4528.69	4665.11	4201.22	5260.62	3414.81	5307.61	5106.92	4061.56	5133.73	4078.14	4547.71	4206.13	4593.93	3644.51	3632.31	4980.12	3039.18	4074.73	5335.2	4142.44	4985.32	5315.01	3183.81	4470.11	4804.98	4231.17
M346.09649T14.72_2	346.096	14.7214	-	-		4628.47	4294.42	4212.24	4262.09	3407.28	4086.44	5036.45	3829.77	4622.47	4084.84	4831.35	4180.78	3529.44	4031.97	3710.77	3175.15	2892.64	3624.04	3264.07	3176.99	2563.59	2962.14	3366.35	3232.36	3548.88	4342.46	3778	3052.94	2780.92	4644.59	3384.59	3643.97	4249.45	3466.43	4057.02	3534.27	3904.12	4476	4248.49	4751.04	4628.87	4922.1	5018.04	4291.29
M346.60161T15.62	346.602	15.6192	-	-		5643.1	5113.2	5344.33	6843.09	4675.18	4106.06	5016.93	5432.07	5671.91	4942.52	5763.53	6068.47	3790.16	4232.1	3656.93	4158.41	4025.39	5129.96	3604.63	4225.96	4454.76	4776.68	4301.02	6353.97	6236.63	5350.87	4995.78	6644.66	5927.7	6006.98	5455.7	5800.07	5896.86	5846.48	7173.73	7686.71	6247.23	7119.69	5502.42	7770.02	7369.41	6563.54	7519.26	5171.11
M346.69069T17.23	346.691	17.2267	-	-		2191.44	3405.37	2098.25	2150.09	1943.93	2451.12	2213.51	2670.32	1706.99	2585.62	1983.91	2514.28	1979.53	2103.45	2267.58	2355.28	2692.52	516.874	2289.52	1812.89	1833.6	2152.88	2064.48	2161.3	2062.93	2585.56	3726.22	2408.86	2809.82	2459.01	2359.28	2039.15	2323.53	2756.24	1272.14	2489.1	3233.8	2424.47	2128.25	2204.16	1936.14	2571.17	1920.96	2741.66
M346.90883T0.74	346.909	0.738298	-	-		15126.1	13504	16430.2	11481.5	13329.2	15984.4	15420.9	14873.3	14760.3	16216.3	12671.7	13682.4	13673	13589.1	14963.1	15244	12944.6	15699.3	15646.6	13850.9	13080.6	16547.3	14077.8	12650.2	14419.1	16399.7	17130.5	13211.4	18908	16518.3	16234.3	12492.7	14890.1	15047.7	14174	18703.1	15374.3	16744.3	15859.6	12568.2	16075	17926.1	18464	16105.4
M347.01236T0.98	347.012	0.980064	-	-		10861.4	12555.4	10909	12977	10313	9616.02	10572	14029.3	9735.58	11688.9	11159.8	11944	12561.2	9861.95	8397.98	10919.9	13120.7	12170.2	10179.3	15798.7	12048.3	9650.29	13560	12610.7	10422.9	10303.9	13022.3	13143.3	15410.8	14289.4	12855.6	14566.2	11877.4	11807	13404.4	10342	11094.1	9211.41	11148.5	18496.4	12314.3	12772.9	11218.4	11962.7
M347.01311T1.34	347.013	1.33611	-	-		13739.9	12840.1	15353.7	14591.3	14154.3	14062.7	13806.2	14027.8	14657.5	14155.7	13613.9	13407.1	13125.7	13995.4	13149.8	13524.6	13875.9	13043.2	13794.3	13355.2	14243.2	13046.9	13201.2	14187.9	13288.1	13630	12411.4	14322.9	14038.1	12572.1	13002.2	13983.7	13107.9	13129.4	13281.3	11682.2	13148.1	13559.7	13206.9	13497.3	13565.6	12782.7	12298	14057
M347.01344T1.14	347.013	1.13673	-	-		15567.2	12405	15171.9	14582.6	13501.1	12661.6	14749.1	15336.1	15582.3	14359.7	13919.6	14015.2	13137.5	14683.8	15249.7	13250.8	13983.3	15529.9	13884.4	13861.6	17289.3	13241.2	14447.7	14879.3	16878.6	13174.9	14185.8	14851.6	13305.5	13500.5	13776.6	14698.3	13405.1	15222.8	13130.8	13640.5	13040	12695.1	11841.6	14670	14416.3	14685.4	13656.5	14242.9
M347.09767T14.72	347.098	14.72	-	-		9500.02	10166	3874.78	9611.63	11712	11198.9	11837.9	10804.6	9876.08	10959.5	10452.2	10065.3	8865.44	9980.53	9282.95	7183.07	8434.68	7337.81	7528.53	7667.62	7410.85	7281.01	8386.07	7603.13	7699.85	8433.38	8071.59	7506.51	6752.28	8151.96	8832.5	8921.7	7779.5	9106.28	7869.63	9584.08	7688.66	10201	9243.62	8165.07	8044.82	9424.81	9047.37	8664.64
M347.10979T15.24	347.11	15.2419	-	-		9732.8	10334.7	8970.52	9540.41	10373.8	11789.3	10561.3	8136.73	10333.9	10148.1	8715.17	8199.41	12212.9	11264	11409.9	12317.5	10582.5	10765	11299.9	11601.3	9922.36	11483.5	11204	10811	12334.6	12404.1	9905.43	9302.95	11084.9	10381	9612.38	8936.19	9660.19	9353.04	10367.9	9940.09	8592.12	9495.79	11652.1	10106.6	10248.1	9853.66	8977.93	11721.8
M347.59901T14.72_1	347.599	14.7214	-	-		3388.03	2765.75	3056.73	3551.36	3421.52	2995.34	3693.37	3232.02	3300.04	2843.9	2796.62	4316.87	3756.77	4743.83	3521.42	3311.01	3711.1	2928.93	3788.01	2810.23	2649.41	3951.41	3183.35	3907.62	3470.24	3286.24	5048.28	4043.76	4015.02	3853.84	3492.95	3366.44	2654.18	3067.05	2965.19	3462.81	3516.49	3745.61	3798.24	4862.64	2789.94	2439.6	3072.91	2940.25
M347.61062T15.24_1	347.611	15.2428	-	-		3618.61	4175.91	3764.78	4060.88	4338.58	4855.81	4990.38	4683.34	5623.02	4514.66	4015.82	4825.93	7287.1	5677.82	5100.51	5812.4	5739.84	6214.58	6798.61	5753.51	6179.08	5407.01	5102.63	5098.7	5510.19	5048.49	4561.03	4967.91	4765	5700.17	5010.25	4226.9	4112.53	5105.01	5115.47	4727.31	4327.8	5086.18	4476.12	4462.39	4407	4656.39	3666.16	4542.32
M348.09608T14.72_2	348.096	14.7241	-	-		4846	4191.52	4453.93	3492.95	4034.12	5687.85	5695.11	5384.72	4007.44	4632.69	4745.6	5097.24	6132.1	4721.06	5621.78	4416.22	3585.17	3996.97	3835.75	4084.14	4720.37	4335.42	3312.32	4217	4944.45	4166.45	4740.99	3536.8	4547.6	3664.22	4488.99	4445.69	4374.87	3716.29	4205.9	3350.2	4954.07	4296.8	4504.99	4508.63	4502.6	4106.3	3760.78	5059.99
M348.10545T15.62	348.105	15.6193	-	-	[M+2Na]2+ 650.233	10402.5	8130.58	9539.19	9499.25	9353.83	8885.22	8677.96	8291.37	9668.8	9747.74	11479.4	9369.96	6054.88	8561.77	8141.35	7512.77	7010.46	7066.76	7571.57	6397.65	7999.76	8111.79	8992.92	6687.48	7635.41	8844.39	9558.98	9628.55	7772.9	9438.37	8188.78	9182.72	8499.03	8923.72	8287.2	9858.79	9559.84	8818.64	8207.46	8702.83	9201.58	9568.31	11839.5	8853.63
M348.10857T15.24_2	348.109	15.243	-	-		8645.32	7685.1	6500.12	6751.6	6161.92	7954.77	5803.1	6310.27	5781.46	6645.2	5456.65	6614.69	7804.96	6879.13	8038.96	7629.53	6673.5	8176.28	8532.6	7910.66	7570.55	6948.53	7309.34	10028.3	6186.96	6234.03	6745.75	7228.46	6403.04	7122.4	6695.15	5472.37	7941.93	6113.13	7735.34	6602.12	6242.18	7002.26	6205.7	7023.16	7265.01	6563.31	8290.52	5948.18
M348.60956T15.24	348.61	15.242	-	-		2918.88	3030.44	2909.24	3121.8	2626.21	3359.43	3167.08	2060.98	3313.79	2222.73	2268.05	3141.61	3855.94	3013.73	2487.9	3180.45	3235.93	2841.14	3752.27	3900.15	3081.99	3442.08	3188.09	3073.68	3535.25	3373.04	3124.49	2779	3046.62	3127.16	3152.72	2574.07	2905.72	2452.64	3155.65	2439.14	2545.73	3159.59	2590.14	2564.76	2708.96	3018.26	2895.92	3420.46
M349.10408T15.62	349.104	15.6213	-	-		4223.93	4299.25	4404.15	4595.26	4216	4617.5	4204.47	4406.2	5476.73	5101.92	4840.5	3994.26	3078.7	3799.48	3644.19	4382.19	3548.95	4474.34	3607.65	3621.55	3236.24	4077.95	3985.21	4765.66	5420.29	4821.31	5019.81	5125.67	4632.47	5007.93	6665.37	5644.84	5250.51	5593.34	3986.55	5297.32	5538.8	5230.9	4686.27	5385.27	4953.18	4107.3	4131.15	4984.79
M349.4113T0.73_2	349.411	0.734206	-	-		7689.38	6884.16	7307.42	7392.38	6315.05	7401.83	7498.17	6401.03	7958.14	6865.28	6608.94	9248.77	9980.45	8228.14	9447.81	10257.6	8398.63	8780.85	10000	9646.97	8666.74	8885.1	8562.08	8673.23	9732.51	9715.71	8496.38	7114.91	9311.44	9060.16	6749.11	5808.83	7033.92	6286.02	6046.18	9238.43	8100.67	7358.04	7355.59	6110.27	8685.95	9305.55	7929.27	6625.74
M349.61718T16.79_1	349.617	16.7942	-	-		2698.13	2774.49	2263.43	3030.25	2888.49	3727.49	3416.16	2938.98	3390.11	2740.99	2699.07	3261.07	4487.43	2630.08	4192.76	3655.24	4418.99	3312.89	4097.28	3070.83	3591.29	3326.4	3598.01	3661.98	3904.73	4088.77	3631.18	4059.3	4404.12	3229.15	3693.74	3896.73	3972.78	3816.21	4532.67	3515	3743.74	3471	3921.87	3643.92	3690.39	3725.87	3942.98	3678.25
M349.9123T0.74	349.912	0.737823	-	-		4007.05	3628.88	2659.93	2773.15	3009.84	3449.15	4689.01	2598.7	4107.16	3948.82	3414.32	3655.96	3901.63	4794.35	4037.91	3886.66	4328.19	3436.36	4621.33	3705.39	3904.64	4324.41	3491.8	3990.26	4445.5	4516.73	4454.44	2601.89	5039.54	4752.64	3228.49	3282.95	3143.86	4122.14	2743.92	4990.29	3748.67	4500.43	3884.23	2139.58	4339.96	3886.58	2895.27	3114.15
M349.99339T1.23	349.993	1.23195	-	-	[M+H]+ 348.986	5394.33	5501.46	6214.9	3702.99	4228.59	3656.02	4721.36	4951.25	3211.07	4622.35	6254.64	4632.97	3164.65	3458.64	2758.39	3168.19	3574.71	4002.79	3678.9	4251.55	5077.45	3245.63	3946.97	6128.21	3305.43	3744.69	4478.44	4267.71	4155.97	4342.3	2720.18	3495.37	4634	4115.65	3776.11	3329.99	4852.07	3248.08	4324.76	3831.02	5649.26	4409.57	3688.11	4629.01
M350.11702T16.8_2	350.117	16.8	-	-		2087.14	2395.04	1907.37	2489.4	2261.03	2002.97	2594.44	2517.35	2153.09	1748.01	2944.09	2188.9	1850.61	2042.37	1725.34	1676.23	1855.43	2264.91	1798.86	2584.14	1409.86	1546.53	1691.93	1825.32	2531.52	1894.24	1945.33	1556.25	2314	2308.49	1655.76	2244.6	1782.19	2581.74	1506.71	2288.75	1771.39	1961.54	2029.26	2145.39	1874.04	2057.13	1728.71	2256.11
M350.11971T1.17	350.12	1.16946	-	-		13271.4	10057.1	11317.5	8348.24	11521.3	12825.1	11666.5	11843.3	13606.4	13066.8	9158.3	8066.13	12726	11854.9	11585.7	11329.6	11941.5	10761.8	10930.8	11785.3	14156.9	12379.8	11381.3	10928.1	13868	12609.7	11263.5	11680.5	8800.35	12563.3	10986.5	11578	10643	11899.7	10127.8	11568.3	14342.9	11642.7	8590.51	8766.14	11743.4	12025.1	11354	11952.4
M350.61622T16.8	350.616	16.8005	-	-		2028.54	2017.79	2484.73	2192.13	2997.67	2198.57	2256.34	2384.32	3365.49	2906.86	3523.75	2794.17	2345.3	2404.65	2839.49	2877.13	2416.52	2506.57	2219.53	2385.31	2515.84	2947.71	2891.51	2299	2768.53	2607.83	2381.85	2614.11	2535.87	1832.23	2571.65	1735.23	2031.85	2212.38	2156.49	2515.44	2194.71	2551.32	1750.54	2363.16	2245.91	2449.8	2513.44	2539.26
M351.28932T19.3	351.289	19.3033	-	-		7915.97	6777.78	5193.64	4452.41	5876.38	6254.22	5867.38	4929.78	7774.4	8269.3	6359.91	5922.94	7745.87	10248.6	8158.73	6571.41	3599.6	5608	7837.39	5968.4	8265.66	7273.93	5793.56	4318.24	9181.43	6634.1	8232.1	5508.56	5138.47	7011.03	6645.86	5755.33	4438.36	10023.1	5753.07	5592.86	8914.71	7461.96	6476.2	6123.28	5111.74	8682.39	7868.35	8853.64
M353.03113T8.83	353.031	8.83185	-	-		1913.56	2275.81	2756.13	1720.28	2471.43	1527.51	2149.88	2205.37	2293.32	1882.96	2420.47	1983.68	1840.47	2202.96	2324.6	2637.15	2269.83	1616.15	1962.6	2149.6	2542.79	2882.84	1569.98	1257.13	3964.37	2324	3566.87	2329.29	2322.14	2283.78	2203.21	2559.35	1962.27	2651.12	1977.67	2566.22	2771.86	3251.83	2731.63	2613.51	2643.74	2402.62	1909.47	2764.14
M353.12874T13.15	353.129	13.1519	-	-		11961.4	16606.3	10607.1	7163.79	13722.5	10210.2	8831	10168.5	12487.9	12677.6	11318.9	10649	7754.11	7901.74	7486.13	11001.9	9555.82	11732.1	9918.6	6182.64	7033.24	9220.71	12470.4	7526.08	8521.14	15016.9	9415.26	17738.6	10660.6	10544	8280.11	7491.68	11171.3	8708.58	12423.2	12874.6	10589.5	8624.24	14644.6	7269.3	7921.71	11775.3	9530.82	12518.2
M354.01208T1.05	354.012	1.04802	-	-		3858.95	3520.34	5077.43	8947.19	4117.37	4750.2	3687.14	3401.71	4581.51	1511.01	3872.03	4003.66	2986.92	3389.85	3759.17	4091.65	3196.57	6994.51	3253.42	3189.89	3024.6	5215.53	5016.97	4052.95	1998.15	3222.53	542.76	3123.98	3584.4	3648.57	3748.36	2252.23	4278.97	3410.18	4401.4	3188.84	2060.28	3549.75	3443.76	2902.85	3162.87	2292.52	3261.95	3493.53
M354.10685T15.24	354.107	15.2433	-	-		5383.49	5063.15	4901.12	5793.97	5005.78	4265.14	4621.38	4573.54	4506.2	5141.73	5137.55	3645.6	3482.22	3918.39	3727.75	3834.95	3901.57	3463.49	2804.36	3655.8	3421.77	4123.16	3562.74	3535.63	3717.13	4974.95	4283.57	4049.23	3756.22	4804.56	5262.25	4731.03	4892.07	5353.41	5412.56	5292.13	5652.56	5433.07	5537.68	6001.82	5658.57	5572.06	6123.22	5730.58
M354.11744T15.99	354.117	15.9905	-	-		5723.36	5589.24	6179.65	3794.18	4684.62	4787.41	5053.16	5521.2	5746.46	5311.43	5635.42	5188.88	4670.47	5567.61	6612.98	5055.84	5645.66	5811.7	5792.55	5919.39	5510.25	5704.69	4430.18	6795.07	4392.57	5332.61	6188.14	5721	5417.99	5029.66	5502.49	4982.86	4590.6	4344.33	5363.63	3957.46	5198.9	4702.18	4395.01	3913.13	3814.74	4688.65	4007.06	3898.44
M354.59912T15.03_1	354.599	15.0324	-	-		5369.72	5777.86	4729.69	3781.23	3407.51	5342.1	5255.63	4507.47	5048.5	3688.8	3584.58	4960.05	5135.41	5720.17	6398.56	6408.5	5531.12	4616.81	6009.16	4303.94	7213.54	6250.61	4956.14	4615.45	6004.17	6269.68	7292.84	5042.61	5168.89	5587.17	4095.07	5042	4398.66	4353.62	3848.57	5543.7	5623.14	6169.55	7058.11	4997.84	5594.9	5339.76	4988.37	6169.23
M354.60856T15.24	354.609	15.2427	-	-		3413.63	2951.05	3203.81	3283.56	3388.04	2701.17	3467.61	2524.13	2347.08	2466.65	3511.62	3122.49	2480.53	3038.59	2562.94	2422.85	2426.42	3798.91	2409.71	2443.9	2989.58	3135.01	3058.66	2415.27	2822.3	3088.18	2913.24	3005.89	2784.16	2891.97	3789.4	3167.43	2575.35	3223.98	2776.29	2868.14	2504.5	2897.16	2390.25	2766.96	3245.6	3612.11	2797.87	2422.89
M354.61837T15.99_1	354.618	15.9899	-	-		2527.53	2600.16	2639.26	2160.32	3044.98	2215.82	1933.31	2235.76	2666.62	2662.78	2272.01	2959.86	2378.23	3095.63	2930.91	2788.59	2198.69	2852.91	3724.75	2054.2	2936.91	2710.74	2358.42	3477.12	2477.99	2957.34	3074.86	3184.74	3885.46	2793.46	2346.02	2251.58	3658.25	2147.83	2984.93	2552.88	3328.76	2733.77	2144.22	2273.73	2320.94	2418.03	2671.19	2179.87
M355.01215T1.1	355.012	1.09713	-	-		13540.8	11950.9	12314.7	12623.2	12477.6	11586.6	12222	13068	11865.6	11282.4	11596.5	11813.1	9739.91	10959.4	11488.2	11465.5	11233.7	10195.2	11093.4	11108.6	11651.1	11124.1	11985.9	11210.1	10902.2	10620.7	15982.4	13104.3	11993.8	12859.1	12135.4	15345.7	11917.2	12964.5	11624.3	11431.6	12281.9	10390.5	11589	12317.1	12643.9	11559.9	12192.1	12587.2
M355.02593T11.12	355.026	11.125	-	-		2434.36	3105.92	2866.07	945.316	2806.28	1203.68	3891.42	2269.19	2024.56	2322.09	2546.05	1959.28	2676.62	1450.43	1550.68	1975.86	2243.4	3305.53	2687.32	2448.57	2295.78	1312.1	2764.07	3040.93	1450.9	1616.44	2673.33	3440.87	1799.79	2106.45	2653.35	1262.75	1894.38	2547.54	2042.02	1983.13	3707.83	1274.96	1596.47	2009.13	1996.24	1300.06	855.89	2066.98
M355.06113T8.99	355.061	8.98566	-	-		2051.52	2972.01	1899.09	2214.92	2402.07	2910.18	2092.09	2333.33	2460.64	2055.15	2334.05	2342.97	1592.9	3425.21	2532.64	1974.28	2376.99	2278.14	2271.87	1994.58	3069.3	2586.26	2888.81	1083.01	2458.88	3017.91	3551.33	2842.16	2967.3	3412.75	2591.32	3742.09	2942.96	2655.3	2785.01	3777.04	2810.49	3322.37	2696.62	4388.2	3263.22	2109.53	2393.22	2758.25
M355.10017T15.03_2	355.1	15.0289	-	-		1693.26	4454.84	3065.21	2310.56	2185.86	2026.8	1283.89	2785.24	2082.67	1966.82	2207.43	3956.49	2493.23	4005.28	3012.69	3763.17	2899.59	2761.55	4162.41	2536.36	3128.21	3558.68	2266.18	3276.43	4027.06	3004.63	3064.48	2317.47	3820.36	3201.69	2397.94	2898.21	3302.09	3559.62	2511.27	2952.08	3320.74	3772	4418.55	2536.92	3087.21	3315.69	1993.04	2757.42
M355.11619T15.99_2	355.116	15.9895	-	-		3444.3	3925.65	3987.1	2565.2	3282.88	3215.89	2824.79	2891.1	2888.35	3475.13	3211.78	3232.43	2636.94	3425.1	2426.19	3508.26	2567.24	1856	3438.5	3182.76	2379.4	2596.44	2730.07	2603.27	2033.7	3806.69	3128.82	4440.82	2922.29	2986.18	3430.9	3373.62	3364.12	2401.26	4907.3	2667.52	3365.55	4540.21	3901.42	3066.49	2497.08	3706.89	3468.49	3466.04
M355.1865T7.57	355.186	7.56765	-	-		5069.02	3550.8	3096.75	3808.99	4224.28	4226.32	4047.04	3011	3537.25	4109.85	3106.23	3122.67	3907.39	4112.03	2681.1	2603.2	2857.53	2806.54	3244.09	2589.28	3095.63	4333.44	3651.46	4298.13	4459.34	3912.61	3944.04	4447.39	3934.14	3165.29	4248.64	3868.63	3721.33	4329.69	3242.15	4971.62	3980.74	4120.37	4814.44	3958.87	6018.86	4850.05	4544.23	4835.04
M355.26334T12.92	355.263	12.9152	-	-		154671	170138	111499	47806.7	150823	84463.5	61031.2	80783.3	78977.3	213492	127783	87686.8	78542.1	93012.7	95005.4	269204	107183	316207	90216.6	110753	409651	318405	299693	189780	462677	200021	78234.5	339088	253568	188058	171859	146618	258377	161582	141638	104556	194169	195440	213427	92887.4	94974.5	294649	117833	250401
M355.59787T15.03	355.598	15.0262	-	-		2492.1	2126.92	2882.02	2158.35	2332.55	2273.18	1792.82	2045.77	1765.45	1469.6	2290.2	2164.55	2772.28	2653.53	3620.23	2731.07	3077.96	2491.82	3632.58	2408.79	3428.78	2098.69	2338.34	2298.35	3389.6	3701.48	3146.86	2689.88	3244.52	3037.49	3211.63	1786.32	3352.9	3185.92	2725.67	3310.39	3291.57	2321.5	3071.64	2390.22	3224.71	2775.4	2670.26	3080.94
M355.61095T15.24	355.611	15.2444	-	-	[M+K+NH3]+ 299.63	2156.97	1839.4	2524.3	3002.1	3091.35	2691.7	2907.68	2814.06	2674.12	3563.7	2476.43	2764.21	2084.26	2444.74	1627.02	3116.42	2145.75	2267.39	2833.91	1892.47	2748.93	1930.2	2567.64	1993.93	2265.78	2150.2	2070.01	2692.27	2358.22	2675.61	3222.37	4103.62	3059.18	3015.07	3330.96	3082.54	2878.75	2787.31	2819.19	3084.44	3395.13	3669.31	3667.81	2878.32
M356.13661T13.15	356.137	13.1511	-	-		2962.34	4435.69	3045.12	2400.15	3538.28	3225.22	2464.56	2352.19	3441.62	2917.15	2177.42	2206.99	3190.83	2870.08	3073.52	3516.46	3015.97	3556.75	2907.87	3027.57	3660.76	2874.17	4438.61	2223.32	2680.54	3690.95	2610.22	4171.97	3804.95	2958.58	2939.36	2313.44	3072.24	2636.85	3251.05	3537.69	4848.22	2384.41	3831.46	2193.68	3040.07	2861.52	3113.31	3265.08
M356.26681T12.92	356.267	12.9152	-	-		42965.8	48554.1	29990.3	13710	39924.5	24260.7	17563.4	23249.4	20140.4	56609	34512	21802.7	21851.7	26070.8	22006.5	69542.4	28174.6	81524.1	21544.8	29052.4	103589	80833.7	83069.7	44797.5	122720	49124.5	20369.9	92400.9	63765.1	49353.9	48510.6	37893.7	71941.6	40528.8	40912.8	27053.9	49196.4	50844.6	57088.1	25257.7	23754.5	80770.5	31548.3	68053.8
M356.27988T12.73	356.28	12.7289	-	-		13967.3	2871.36	4866.24	4741.98	5942.56	3309.89	6017.31	5278.72	17604.1	5516.65	2388.32	4769.03	7682.32	8631.95	7812.6	6532.42	5131.82	3526.35	3388.47	5786.81	2814.24	5674.57	5622.88	3870.1	16953.3	5359.89	6772.35	5841.93	3645.03	5024.58	3805.37	8375.81	8225.07	5494.18	7623.19	7230.34	4951.43	7696.35	19555.3	1923.31	6979.38	8761.64	8450.56	5387.37
M356.59703T14.98	356.597	14.9823	-	-		3119.8	2158.28	3771.02	2426.01	2405.61	1975.68	3006.16	3034.09	2156.33	2865.82	2645.26	2928.95	1276.57	2605.62	1902.32	1982.37	1905.48	2159.63	1967.11	1947.18	1998.04	2507.57	1964.62	2647.41	2722.94	2321.51	2156.95	2576.99	2259.36	1855.03	2943.32	2307.76	3620.47	2781.22	3424.08	2955.56	3250.72	3515.51	4831.21	2417.77	2041.41	3571.73	2883.53	3134.98
M357.00862T1	357.009	1.00179	-	-	[M+Na]+ 334.024	6684.68	5397	4710.96	6814.42	8393.08	7126.09	5083.88	6732.45	4815.01	6722.16	7660.13	6153.89	5484	5728.5	6304.22	7139.41	5589.72	4792.52	6473.92	7297.19	9102.09	5378.55	9973.42	6994.81	6466.23	5862.91	7512.15	7854.4	7033.16	7407.47	6461.14	6593.84	9896.12	8114.4	7779.97	5822.27	7680.1	5213.73	5583.94	8889.54	6178.11	7925.22	6261.28	6704.19
M357.0508T9.34	357.051	9.34068	-	-		9345.28	20261.5	19623.3	8146.16	15634.7	13707.9	12059.2	12745.1	12422.3	13109.7	14767.1	11100.8	2125.14	16600.4	6931.72	6784.36	11181.3	12667.1	12611.3	9719.8	8573.28	6083.71	13343.4	1215.23	8298.27	12708.1	8597.01	16142.5	15102.9	11606	9060.46	8693.07	12142.4	6531.13	13097.3	15350.1	12103.6	14246.2	9192.89	7980.32	10643.7	8176.15	9288.15	14503.6
M357.0659T2.44	357.066	2.44301	-	-		2411.04	3536.32	5806.07	2251.9	3233.12	2551.27	2588.38	2752.23	1415.36	2555.96	3085.55	2048.56	548.948	2125.94	243.378	2478.12	3363.34	2268.97	900.703	2085.36	3182.88	1594.67	3072.58	5998.13	1717.13	2340.61	2777.51	2136.58	2741.6	3097.86	2275.22	466.447	2971.44	2070.93	1682.53	90.0999	2771.74	945.535	3450.62	1649.4	3514.87	2756.5	1913.73	2314.18
M357.26984T12.91	357.27	12.915	-	-		5458.87	7179.35	3922.25	1614.47	5169.34	3551.78	2353.83	3728.76	3132.58	7180.97	3715.01	3107.55	2290.49	2832.48	3311.22	8747.71	3204.97	10124.9	3118.58	4135.68	14568.9	10279.3	11132.5	5381.15	16310.7	6654.96	2710.49	10990.1	7112.21	6324.16	6250.21	4598.28	11125.4	5901.39	4957.83	3326.86	5726.29	7199.09	6937.54	3749.53	4472.32	12528.1	3833.7	9872.21
M357.27889T14.74	357.279	14.7449	-	-	[M+H-H20]+ 374.285	13642.4	18490	15897.1	6732.49	28252.9	8552.41	11458	13872.3	4860.3	27003.9	13533	8024.97	9362.16	16862.4	12794.4	34060.5	14825.8	65137	7416.36	21193.2	84360.6	48034.3	45340.3	19333.1	78842.6	16309.3	10447	52622.3	39608.8	23109.5	45596.9	27274.5	42265.3	19464.4	15264.1	19061.9	18798.9	23541.5	16137.1	7948.03	18752.2	43586.1	20571.4	47912.2
M357.40006T0.74_2	357.4	0.736872	-	-		12540.4	12658.3	13780.7	13111	12039	14463.8	12276.8	10585.9	12660.2	12121.3	10154.4	12200.4	11439	12935.4	12608.5	14829.8	12198.9	14396.9	13440.4	13677	12421.5	11442.4	12554.6	13594.9	11348.4	9302.22	10788.2	9652.32	11167.9	11635.6	10558	8992.16	11678.4	13162.8	10273.8	11869.3	9996	10822.7	11657.5	8503.46	11054.6	9763.02	11241.9	12739.9
M357.90105T0.74_1	357.901	0.736865	-	-		3431.38	3894.32	4529.37	3811.42	4322.16	3965.29	4754.47	3431.7	5498.59	3325.46	4296.38	4181.53	5063.67	4700.46	4865.19	3787.71	4496.92	5152.41	5501.05	4730.57	4800.79	4574.69	4921.31	2769.11	3600.88	3141.99	4293.8	3507.95	3494.61	3281.2	2623.11	3007.25	3380.9	4182.5	4629.22	4359.15	2846.46	4369.37	3428.6	3047.97	4481.56	2816.53	3361.83	3732.03
M358.10759T13.96	358.108	13.9626	-	-		3166.81	4055.49	3722.88	2955.91	3866	2993.79	4165.84	5094.8	4240.75	4482.01	2558.34	2644.09	2922.63	3161.19	4579.32	5151.31	4737.58	4762.91	5335.66	3722.89	2483.58	2190.52	4273.9	4663.67	5266.76	5107.51	5323.81	6978.69	6476.24	4434.01	3732.81	3415.42	3977.32	3801.84	4223.14	4833.39	5646.79	4489.67	5623.19	3928.33	1151.69	2294.96	2995.74	4003.5
M358.28244T14.75	358.282	14.7461	-	-		3861.74	6754.16	4739.55	2140.07	7466.68	2986.63	3761.05	3382.11	1086.23	5828.65	2526.39	2091.69	3004.1	3953.54	3391.09	8427.21	3152.92	16342.1	1524.63	5704.1	20377.7	11589.7	10978.9	4373.71	19066.2	4404.03	2569.39	15193.7	9490.37	6401.43	12820.2	6480.03	10827.8	5536.81	3544.95	4997.55	6055.41	7632.97	4851.41	2717.88	5441.07	10669.5	5116.55	13202.1
M358.29542T13.11	358.295	13.1077	-	-		13114.4	3421.28	4002.19	3454.74	5279.3	2013.65	4912.15	2475.22	10354.4	3419.96	1593.58	4078.88	6155.88	8119.32	4597.51	4949.92	3535.25	1982.84	1577.68	2735.61	2984.98	6019.3	4715.78	2887.09	18942	5086.07	5359.96	4521.56	3411.35	4536.89	2497	5074.56	6028.25	4627.91	3525.31	5345.88	4195.17	6018.72	10597.9	1379.91	4327.76	6059.47	5028.43	4158.23
M358.41656T0.73_2	358.417	0.734977	-	-		12764.9	10015.6	9409.83	8858.23	10754.8	11214.3	11371.9	10359.2	11060.1	9845.67	7597.65	11011.7	10885.6	10703.6	11337.3	11982.4	10086.2	9698.99	11590.8	9070.55	10331	9693.2	10897.7	10049.4	11109.2	11446.7	9395.99	11528.3	11046.2	10005.8	8060.69	8215.75	10253.2	10709.2	8619.17	11973.2	12498	9706.96	10447.4	6286.28	9820.56	11312.6	8265.14	10655
M359.01263T11.15	359.013	11.1511	-	-		2301.89	1847.11	2162.15	1191.26	2224.97	1686.09	2181.33	2365.45	2187.28	2281.77	1744.96	2063.23	1835.73	1753.17	1859.45	1774.08	1606.51	2556.48	1179.9	1497.9	1896.03	1510.76	1568.97	1594.06	1522.91	2132.73	2251.58	2540.66	2119.71	2171.3	2591.92	2157.36	2210.43	2107.84	2140.31	2498.21	2634.49	2222.55	3376.18	2354.45	2433.34	2503.14	2277.2	1987
M359.12396T8.39	359.124	8.39123	-	-	[2M+H]+ 179.058	155400	246145	242277	148947	191354	191666	200306	220497	223173	157656	186098	183130	124252	202445	176591	152972	214336	219435	186348	173905	186437	173625	169223	114289	138962	196248	191562	205425	177352	223611	176156	213318	228876	156755	229719	215842	219512	223735	203397	183686	223264	202125	159013	196715
M359.15179T17.41	359.152	17.4107	-	-		19679	19768.7	20468.7	1677.87	16802	28637.6	17408.2	17154.6	21970.2	17621.1	18217.9	21421.8	16756.7	19622.1	19207.6	16693.7	11046.6	15423.8	18595.3	16983.4	14832.8	16712.2	16294.7	14870.7	22925.2	19237.4	27256.9	16939.1	16459.9	17252.6	15098.8	19204.5	19029.2	20078.8	17878.9	16671.1	22345.7	16958.8	16020.6	16908.4	14065.3	19711.8	17547.4	17272.2
M359.19272T6.95	359.193	6.94937	-	-		3151.19	3146.24	2838.95	2332.68	3026.63	2796.02	2984.26	2363.84	2028.63	2656.8	1436.05	3108.17	2382.11	4120.96	3506.54	2779.27	3545.09	1822.73	3316.11	3447.73	4328.06	2556.45	2448.09	2211.86	2559.79	2676.62	2919.07	2190.57	2717.7	3812.86	2024.08	2651.18	1790.37	2612.65	2903.82	3354.02	2139.17	1637.53	3524.83	2224.84	2081.91	2887.6	2747.46	1594.71
M359.43363T0.74_2	359.434	0.740065	-	-	[M+Na+NH3]+ 319.411	4025.81	4843.18	4963.75	4281.18	4110.66	5185.82	6464	5445.59	5255.93	5215.41	5047.22	6043.12	6014.67	5277.73	5110.46	5722.12	5895.42	4321.71	4919.36	4459.34	5030.02	5640.98	5816.38	5550.23	6272.29	6350.31	6639.52	5521.72	8817.56	5671.98	5677.27	5808.56	5572.59	4422.59	5144.91	6699.34	6623.48	5690.22	6685.63	4291.54	5933.53	5315.86	6015.41	6073.79
M360.12726T8.39	360.127	8.38883	-	-		34794.3	53264.1	50042.7	30969.8	39059.6	40735.7	42635.9	46694.4	49877.3	36997.9	41491	40073.5	26296.5	43672.9	37830.5	28481.2	47555.9	48141.6	39555.8	36762.7	37014.7	39027.5	36744.9	24977.8	29527.5	42597.1	40658.5	45527.5	40795	45219.5	37146.8	48977.4	45640.6	33605.8	45524.9	48089.6	47795.6	48937.7	38541.6	42654.4	48277.9	41118.1	33008.8	38637.9
M360.43293T0.74	360.433	0.742279	-	-	[3M+2Na]2+ 224.966	2833.74	2970.73	2558.64	2399.38	2107.32	3707.47	3023.43	2062.89	2995.84	3108.73	3076.73	3447.56	2726.14	2382.35	2980.91	3135.03	4100.36	2302.56	3253.19	3666.04	2683.78	3275.54	2379.36	3604.37	2691.1	3679.8	2894.11	2733.78	4069.06	3738.59	3238.54	2171.99	3165.33	3344.97	2456.31	4879.28	3189.21	2412.4	3368.13	1899.43	2822.28	3181.52	2387.16	2938.05
M361.09562T14.72	361.096	14.721	-	-	[M+H-C4H8]+ 416.159	2659.97	2949.5	3997.78	2461.41	3266.91	4452.73	3684.64	3315.93	4212.51	3601.12	3270.81	3330.89	3238.45	3669.83	3555.18	2887.15	3254.85	2546.73	3066.91	3010.33	2903.58	2184.93	2196.43	2598.75	2646.04	3079.09	2658.04	2713.16	2498.07	2715.96	2423.58	2327.43	2567.89	2843.95	2703.05	3131.37	2693.29	2861.82	2407.91	2662.2	3310.04	3411.95	3430.97	3395.87
M361.12537T16.49	361.125	16.4872	-	-	[M+H-CH2]+ 374.127	13015.4	11808.8	13431.4	8378.51	11195.5	10801.9	10495	10312.9	10735.6	12277.7	11555.8	10885.7	9864.92	12022.6	9781.84	12189.5	10199.8	10176.8	9740.49	9262.95	10841.7	9408.26	9116.82	10014.3	9194.19	10116.2	8155.95	9004.1	9180.35	8880.37	8626.67	7073.84	9392.61	9320.36	8742.06	10785.8	9887.16	9809.22	9271.88	7745.35	7201.74	9782.68	9934.08	8923.62
[truncated: 2,457 more rows]
[truncated: 4 more columns]
